# Supplementary material for: Spike S1 domain interactome in non-pulmonary systems: A role beyond the receptor recognition
Source: Front Mol Biosci. 2022 Sep 26;9:975570. doi: 10.3389/fmolb.2022.975570 (PMC9550266; doi:10.3389/fmolb.2022.975570)
Supplement: Supplementary file 1 [file Table2.XLSX]

## Sheet: 1
Supplementary Table 2. Putative interactors of the three different cell lines were obtained with REPRINT software by using the SAINT algorithm. In sheet 1, for each protein were reported: baitGene, prey SwissProt Code, preyGene, the intensities of pulldown and controls, the Avg. intensity, and finally the Fold change A and B (FCA, FCB). In sheets 2, 3, and 4 the prey SwissProt code and gene and t…
baitGene	prey	preyGene	Caco-2 Intensity	HK-2 Intensity	NCM460D Intensity	User Controls (SPC or Intensities)	Avg. intensity	FCA	FCB
S	P07195	LDHB	104870000	47714000	9002400	0|0|0	5.38621e+07	7.12982	5.30946
S	P17931	LGALS3	0	0	54654000	0|0|0	18218000	6.41908	2.58419
S	Q9H0U4	RAB1B	0	0	46413000	0|0|0	15471000	5.60197	2.45553
S	P30048	PRDX3	32861000	63601000	21518000	0|0|0	3.93267e+07	5.35699	5.07754
S	P51149	RAB7A	15965000	45316000	26090000	0|0|0	2.91237e+07	4.83967	4.16146
S	Q9HDC9	APMAP	4288500	0	34957000	0|0|0	1.30818e+07	4.65689	2.617
S	Q9NSE4	IARS2	9569300	0	26695000	0|0|0	12088100	4.07265	2.73064
S	P30040	ERP29	4984800	16409000	24941000	0|0|0	1.54449e+07	3.89117	2.81398
S	P30084	ECHS1	13169000	0	22624000	0|0|0	11931000	3.82916	2.77274
S	Q9P2R7	SUCLA2	0	0	25249000	0|0|0	8.41633e+06	3.5035	2.04167
S	P16435	POR	10436000	0	19215000	0|0|0	9.88367e+06	3.36955	2.52354
S	P62491	RAB11A	0	0	23897000	0|0|0	7.96567e+06	3.36945	2.00899
S	Q13011	ECH1	0	0	23667000	0|0|0	7889000	3.34664	2.00332
S	P40199	CEACAM6	0	0	23150000	0|0|0	7.71667e+06	3.29538	1.99047
S	P22392	NME2	36435000	41974000	0	0|0|0	2.61363e+07	3.12357	2.44973
S	O14950	MYL12B	0	176540000	0	0|0|0	5.88467e+07	3.11321	1.94338
S	P07954	FH	18973000	0	10259000	0|0|0	9744000	2.86139	2.42794
S	P02788	LTF	0	0	18455000	0|0|0	6.15167e+06	2.82986	1.86526
S	P34897	SHMT2	12781000	46673000	6642000	0|0|0	22032000	2.78593	2.78274
S	Q02218	OGDH	0	0	17839000	0|0|0	5.94633e+06	2.76878	1.84753
S	P61586	RHOA	9489800	22453000	10777000	0|0|0	1.42399e+07	2.75957	2.58231
S	Q9BS26	ERP44	0	0	17576000	0|0|0	5.85867e+06	2.7427	1.83986
S	Q99798	ACO2	8835900	0	11924000	0|0|0	6.91997e+06	2.57544	2.14792
S	P11177	PDHB	9064600	0	11559000	0|0|0	6.87453e+06	2.54942	2.14059
S	P08559	PDHA1	4627900	0	13477000	0|0|0	6.03497e+06	2.54219	2.00855
S	P36957	DLST	0	0	15104000	0|0|0	5.03467e+06	2.4976	1.7644
S	P61026	RAB10	0	0	15101000	0|0|0	5.03367e+06	2.4973	1.76431
S	P16615	ATP2A2	2775800	0	13610000	0|0|0	5.46193e+06	2.47297	1.90552
S	P06744	GPI	16070000	0	7537200	0|0|0	7.86907e+06	2.46235	2.16844
S	P11279	LAMP1	0	0	14730000	0|0|0	4910000	2.46052	1.75241
S	O00264	PGRMC1	0	40633000	8777400	0|0|0	1.64701e+07	2.35669	2.07078
S	P23526	AHCY	29684000	0	0	0|0|0	9.89467e+06	2.32075	1.70566
S	P38117	ETFB	0	0	12371000	0|0|0	4.12367e+06	2.22662	1.67267
S	O00299	CLIC1	17802000	0	4367700	0|0|0	7389900	2.22515	1.98002
S	Q9HAV7	GRPEL1	0	0	12247000	0|0|0	4.08233e+06	2.21432	1.66827
S	Q96RP9	GFM1	0	0	11179000	0|0|0	3.72633e+06	2.10843	1.62931
S	Q15758	SLC1A5	0	0	11111000	0|0|0	3.70367e+06	2.10168	1.62677
S	Q8NFV4	ABHD11	0	0	11083000	0|0|0	3.69433e+06	2.09891	1.62572
S	P62820	RAB1A	24364000	0	0	0|0|0	8.12133e+06	2.08405	1.62008
S	Q9UJZ1	STOML2	0	50350000	4741900	0|0|0	1.8364e+07	2.07287	1.89165
S	Q8NBS9	TXNDC5	14792000	0	3935400	0|0|0	6.24247e+06	2.04836	1.86207
S	P51148	RAB5C	0	12897000	8779000	0|0|0	7.22533e+06	2.02484	1.74175
S	P31025	LCN1	0	0	10180000	0|0|0	3.39333e+06	2.00937	1.59111
S	P12429	ANXA3	20904000	0	0	0|0|0	6968000	1.9301	1.55916
S	P31930	UQCRC1	2200300	10805000	6833700	0|0|0	6613000	1.90482	1.75936
S	Q02790	FKBP4	0	0	8364000	0|0|0	2788000	1.82931	1.51655
S	P00441	SOD1	18302000	0	0	0|0|0	6.10067e+06	1.81432	1.51
S	Q99805	TM9SF2	0	0	7678000	0|0|0	2.55933e+06	1.76129	1.48638
S	P63241	EIF5A	14015000	10796000	0	0|0|0	8.27033e+06	1.75281	1.58524
S	P34932	HSPA4	16844000	0	0	0|0|0	5.61467e+06	1.74945	1.481
S	P12277	CKB	16560000	0	0	0|0|0	5520000	1.73682	1.47521
S	O95571	ETHE1	0	0	7389700	0|0|0	2.46323e+06	1.73271	1.47332
S	P31944	CASP14	0	0	7341500	0|0|0	2.44717e+06	1.72793	1.47112
S	P49419	ALDH7A1	16179000	0	0	0|0|0	5393000	1.71986	1.46738
S	P30837	ALDH1B1	0	0	7099100	0|0|0	2.36637e+06	1.70389	1.45993
S	O75874	IDH1	15740000	0	0	0|0|0	5.24667e+06	1.70033	1.45826
S	P05556	ITGB1	6210000	35138000	0	0|0|0	1.37827e+07	1.69691	1.60528
S	P36776	LONP1	0	0	6876900	0|0|0	2292300	1.68186	1.44952
S	P20674	COX5A	0	56840000	0	0|0|0	1.89467e+07	1.68038	1.44881
S	P61626	LYZ	0	0	6860300	0|0|0	2.28677e+06	1.68022	1.44873
S	Q99536	VAT1	5459800	0	4342300	0|0|0	3.26737e+06	1.67348	1.58233
S	P13073	COX4I1	0	54847000	0	0|0|0	1.82823e+07	1.65653	1.43736
S	Q9UBI6	GNG12	0	54078000	0	0|0|0	18026000	1.64732	1.43289
S	Q9Y230	RUVBL2	0	0	6520800	0|0|0	2173600	1.64655	1.43251
S	P11047	LAMC1	12246000	8356800	0	0|0|0	6867600	1.6449	1.50741
S	P39656	DDOST	4554900	36881000	0	0|0|0	1.3812e+07	1.64414	1.55191
S	O43852	CALU	0	22496000	3712900	0|0|0	8736300	1.63742	1.5611
S	P10909	CLU	0	51715000	0	0|0|0	1.72383e+07	1.61904	1.41898
S	Q9NYU2	UGGT1	5981900	0	3405500	0|0|0	3.12913e+06	1.60382	1.5355
S	O14745	SLC9A3R1	13381000	0	0	0|0|0	4.46033e+06	1.59537	1.40713
S	O00592	PODXL	13192000	0	0	0|0|0	4.39733e+06	1.58696	1.40287
S	Q96HE7	ERO1A	0	0	5877300	0|0|0	1959100	1.58275	1.40072
S	P11310	ACADM	0	0	5874300	0|0|0	1958100	1.58245	1.40057
S	P14854	COX6B1	0	48244000	0	0|0|0	1.60813e+07	1.57749	1.39804
S	P01891	HLA-A	0	0	5764500	0|0|0	1921500	1.57156	1.395
S	Q9HCC0	MCCC2	0	0	5636400	0|0|0	1878800	1.55886	1.38844
S	P31948	STIP1	12366000	0	0	0|0|0	4122000	1.55021	1.38394
S	P07602	PSAP	0	0	5515000	0|0|0	1.83833e+06	1.54683	1.38217
S	Q9UHG3	PCYOX1	12230000	0	0	0|0|0	4.07667e+06	1.54416	1.38077
S	Q01581	HMGCS1	12186000	0	0	0|0|0	4062000	1.5422	1.37974
S	P40925	MDH1	12178000	0	0	0|0|0	4.05933e+06	1.54184	1.37956
S	P50395	GDI2	11865000	0	0	0|0|0	3955000	1.52792	1.3722
S	P08758	ANXA5	11714000	0	0	0|0|0	3.90467e+06	1.5212	1.36862
S	Q96HS1	PGAM5	0	43023000	0	0|0|0	14341000	1.51499	1.3653
S	P31939	ATIC	11532000	0	0	0|0|0	3844000	1.5131	1.36428
S	P45973	CBX5	0	0	5106400	0|0|0	1.70213e+06	1.50631	1.36063
S	Q9Y624	F11R	11337000	0	0	0|0|0	3779000	1.50443	1.35961
S	P05109	S100A8	0	0	5082900	0|0|0	1694300	1.50398	1.35937
S	Q92598	HSPH1	0	0	5056800	0|0|0	1685600	1.50139	1.35797
S	Q99797	MIPEP	0	0	4987500	0|0|0	1662500	1.49452	1.35423
S	Q9NP72	RAB18	0	0	4947900	0|0|0	1649300	1.4906	1.35208
S	P30044	PRDX5	0	0	4929700	0|0|0	1.64323e+06	1.48879	1.3511
S	Q03135	CAV1	0	40645000	0	0|0|0	1.35483e+07	1.48653	1.34986
S	P40429	RPL13A	10824000	0	0	0|0|0	3608000	1.4816	1.34715
S	P60953	CDC42	10805000	0	0	0|0|0	3.60167e+06	1.48075	1.34668
S	Q9Y6H1	CHCHD2	0	40033000	0	0|0|0	1.33443e+07	1.4792	1.34582
S	O75947	ATP5H	0	39037000	0	0|0|0	1.30123e+07	1.46728	1.33921
S	Q9BWD1	ACAT2	10498000	0	0	0|0|0	3.49933e+06	1.4671	1.33911
S	P16444	DPEP1	0	0	4709200	0|0|0	1.56973e+06	1.46693	1.33901
S	Q9NQC3	RTN4	0	0	4520000	0|0|0	1.50667e+06	1.44817	1.32847
S	Q02818	NUCB1	0	0	4465600	0|0|0	1.48853e+06	1.44278	1.3254
S	Q4G0N4	NADK2	0	0	4338300	0|0|0	1446100	1.43015	1.31818
S	P27487	DPP4	9340900	0	0	0|0|0	3.11363e+06	1.41561	1.30976
S	P52209	PGD	9205200	0	0	0|0|0	3068400	1.40957	1.30623
S	P22307	SCP2	0	0	4118000	0|0|0	1.37267e+06	1.40831	1.30549
S	P18206	VCL	6271800	10395000	0	0|0|0	5555600	1.40349	1.36135
S	P16070	CD44	0	33610000	0	0|0|0	1.12033e+07	1.40232	1.30196
S	P10515	DLAT	0	0	4007700	0|0|0	1335900	1.39737	1.29904
S	Q99733	NAP1L4	8833100	0	0	0|0|0	2.94437e+06	1.39302	1.29645
S	P35613	BSG	0	32257000	0	0|0|0	1.07523e+07	1.38612	1.29233
S	Q13185	CBX3	0	0	3816800	0|0|0	1.27227e+06	1.37845	1.28772
S	P51571	SSR4	0	30357000	0	0|0|0	10119000	1.36338	1.27857
S	P46459	NSF	0	0	3544300	0|0|0	1.18143e+06	1.35143	1.27122
S	P26038	MSN	0	28744000	0	0|0|0	9.58133e+06	1.34407	1.26665
S	P51649	ALDH5A1	7662700	0	0	0|0|0	2.55423e+06	1.34094	1.2647
S	Q15181	PPA1	7334600	0	0	0|0|0	2.44487e+06	1.32634	1.2555
S	P17301	ITGA2	0	0	3281600	0|0|0	1.09387e+06	1.32538	1.25489
S	Q14165	MLEC	0	0	3201900	0|0|0	1067300	1.31748	1.24985
S	Q6YN16	HSDL2	6890000	0	0	0|0|0	2.29667e+06	1.30656	1.24283
S	P20290	BTF3	6778200	0	0	0|0|0	2259400	1.30159	1.2396
S	P29692	EEF1D	0	23810000	0	0|0|0	7.93667e+06	1.28501	1.22871
S	P23141	CES1	6168500	0	0	0|0|0	2.05617e+06	1.27446	1.22168
S	Q8N1F7	NUP93	0	0	2761300	0|0|0	920433	1.27379	1.22124
S	O00151	PDLIM1	6104600	0	0	0|0|0	2.03487e+06	1.27162	1.21978
S	Q9Y512	SAMM50	0	22369000	0	0|0|0	7.45633e+06	1.26776	1.21718
S	Q92896	GLG1	6007200	0	0	0|0|0	2002400	1.26728	1.21686
S	P62888	RPL30	0	22171000	0	0|0|0	7.39033e+06	1.26539	1.21558
S	P35606	COPB2	5940200	0	0	0|0|0	1.98007e+06	1.2643	1.21484
S	P50402	EMD	0	21962000	0	0|0|0	7.32067e+06	1.26289	1.21388
S	P20073	ANXA7	5902200	0	0	0|0|0	1967400	1.26261	1.21369
S	P00387	CYB5R3	0	21628000	0	0|0|0	7.20933e+06	1.25889	1.21116
S	Q9NZI8	IGF2BP1	5811700	0	0	0|0|0	1.93723e+06	1.25858	1.21095
S	O75694	NUP155	0	0	2553600	0|0|0	851200	1.2532	1.20727
S	P20645	M6PR	5641900	0	0	0|0|0	1.88063e+06	1.25103	1.20578
S	Q5T2W1	PDZK1	5589000	0	0	0|0|0	1863000	1.24868	1.20416
S	P23588	EIF4B	5553500	0	0	0|0|0	1.85117e+06	1.2471	1.20307
S	Q96AE4	FUBP1	5308000	0	0	0|0|0	1.76933e+06	1.23617	1.19547
S	P13796	LCP1	5201100	0	0	0|0|0	1733700	1.23142	1.19214
S	Q9NX40	OCIAD1	0	19003000	0	0|0|0	6.33433e+06	1.22747	1.18935
S	P42224	STAT1	0	18214000	0	0|0|0	6.07133e+06	1.21802	1.18264
S	O43615	TIMM44	0	0	2151600	0|0|0	717200	1.21334	1.17928
S	Q92665	MRPS31	0	0	2077500	0|0|0	692500	1.20599	1.17397
S	Q14651	PLS1	0	0	2054700	0|0|0	684900	1.20373	1.17233
S	P09936	UCHL1	0	17014000	0	0|0|0	5.67133e+06	1.20366	1.17228
S	Q16555	DPYSL2	4324500	0	0	0|0|0	1441500	1.19241	1.16403
S	P04279	SEMG1	0	0	1912200	0|0|0	637400	1.1896	1.16195
S	O75396	SEC22B	0	15812000	0	0|0|0	5.27067e+06	1.18927	1.16171
S	P13674	P4HA1	0	15769000	0	0|0|0	5.25633e+06	1.18876	1.16133
S	Q13765	NACA	4239300	0	0	0|0|0	1413100	1.18862	1.16123
S	P36542	ATP5C1	0	15708000	0	0|0|0	5236000	1.18803	1.16079
S	Q99829	CPNE1	4168600	0	0	0|0|0	1.38953e+06	1.18548	1.15889
S	P63162	SNRPN	4161500	0	0	0|0|0	1.38717e+06	1.18516	1.15866
S	P54819	AK2	0	0	1832000	0|0|0	610667	1.18165	1.15603
S	Q15293	RCN1	0	14642000	0	0|0|0	4.88067e+06	1.17527	1.15124
S	Q9Y490	TLN1	3909400	0	0	0|0|0	1.30313e+06	1.17394	1.15024
S	P49257	LMAN1	0	14273000	0	0|0|0	4.75767e+06	1.17085	1.1479
S	P22314	UBA1	3668600	0	0	0|0|0	1.22287e+06	1.16323	1.14209
S	P48735	IDH2	0	12879000	0	0|0|0	4293000	1.15416	1.13509
S	Q70UQ0	IKBIP	0	12536000	0	0|0|0	4.17867e+06	1.15006	1.1319
S	P53396	ACLY	3303000	0	0	0|0|0	1101000	1.14696	1.12948
S	Q7Z434	MAVS	0	11824000	0	0|0|0	3.94133e+06	1.14154	1.1252
S	P49736	MCM2	3163000	0	0	0|0|0	1.05433e+06	1.14073	1.12457
S	P37837	TALDO1	2962800	0	0	0|0|0	987600	1.13183	1.11748
S	Q8NBJ5	COLGALT1	0	0	1311000	0|0|0	437000	1.12999	1.11601
S	Q15648	MED1	2914900	0	0	0|0|0	971633	1.12969	1.11577
S	Q15436	SEC23A	2879400	0	0	0|0|0	959800	1.12812	1.1145
S	Q6NUK1	SLC25A24	0	10639000	0	0|0|0	3.54633e+06	1.12735	1.11389
S	P61981	YWHAG	0	10566000	0	0|0|0	3522000	1.12648	1.11318
S	P50895	BCAM	2800200	0	0	0|0|0	933400	1.12459	1.11166
S	P53992	SEC24C	2710800	0	0	0|0|0	903600	1.12061	1.10843
S	O00469	PLOD2	0	10058000	0	0|0|0	3.35267e+06	1.1204	1.10825
S	P54578	USP14	2584000	0	0	0|0|0	861333	1.11497	1.10382
S	Q2TB90	HKDC1	0	9222000	0	0|0|0	3074000	1.11039	1.10005
S	P49588	AARS	2389500	0	0	0|0|0	796500	1.10632	1.09667
S	Q13200	PSMD2	2360500	0	0	0|0|0	786833	1.10503	1.0956
S	Q14677	CLINT1	2224500	0	0	0|0|0	741500	1.09898	1.09053
S	P61224	RAP1B	0	8238500	0	0|0|0	2.74617e+06	1.09862	1.09023
S	Q16658	FSCN1	0	7439800	0	0|0|0	2.47993e+06	1.08906	1.08213
S	P05106	ITGB3	0	6854100	0	0|0|0	2284700	1.08204	1.07611
S	O75439	PMPCB	1822500	0	0	0|0|0	607500	1.08109	1.07528
S	Q14978	NOLC1	1494700	0	0	0|0|0	498233	1.0665	1.06252
S	Q86UP2	KTN1	0	5082900	0	0|0|0	1694300	1.06084	1.05748

## Sheet: 2_NCM460D
prey	preyGene	NCM460D Intensity	Gene Ontology (cellular component)
P17931	LGALS3	54654000	cell surface [GO:0009986]; collagen-containing extracellular matrix [GO:0062023]; cytoplasm [GO:0005737]; cytosol [GO:0005829]; extracellular exosome [GO:0070062]; extracellular region [GO:0005576]; extracellular space [GO:0005615]; ficolin-1-rich granule membrane [GO:0101003]; immunological synapse [GO:0001772]; membrane [GO:0016020]; mitochondrial inner membrane [GO:0005743]; nucleoplasm [GO:00…
Q9H0U4	RAB1B	46413000	cytosol [GO:0005829]; endoplasmic reticulum membrane [GO:0005789]; endoplasmic reticulum-Golgi intermediate compartment membrane [GO:0033116]; extracellular exosome [GO:0070062]; Golgi apparatus [GO:0005794]; Golgi membrane [GO:0000139]; perinuclear region of cytoplasm [GO:0048471]; phagophore assembly site membrane [GO:0034045]; transport vesicle [GO:0030133]
Q9HDC9	APMAP	34957000	cell surface [GO:0009986]; integral component of membrane [GO:0016021]; membrane [GO:0016020]
Q9NSE4	IARS2	26695000	mitochondrial matrix [GO:0005759]; mitochondrion [GO:0005739]
P51149	RAB7A	26090000	alveolar lamellar body [GO:0097208]; anchored component of synaptic vesicle membrane [GO:0098993]; autophagosome membrane [GO:0000421]; cytosol [GO:0005829]; endosome membrane [GO:0010008]; extracellular exosome [GO:0070062]; extrinsic component of lysosome membrane [GO:0032419]; Golgi apparatus [GO:0005794]; late endosome [GO:0005770]; late endosome membrane [GO:0031902]; lipid droplet [GO:00058…
Q9P2R7	SUCLA2	25249000	extracellular exosome [GO:0070062]; mitochondrial matrix [GO:0005759]; mitochondrion [GO:0005739]; succinate-CoA ligase complex [GO:0042709]; succinate-CoA ligase complex (ADP-forming) [GO:0009361]
P30040	ERP29	24941000	cell surface [GO:0009986]; endoplasmic reticulum [GO:0005783]; endoplasmic reticulum lumen [GO:0005788]; melanosome [GO:0042470]; membrane [GO:0016020]; smooth endoplasmic reticulum [GO:0005790]; transport vesicle [GO:0030133]
P62491	RAB11A	23897000	axon [GO:0030424]; centriolar satellite [GO:0034451]; centriole [GO:0005814]; centrosome [GO:0005813]; cleavage furrow [GO:0032154]; cytoplasmic vesicle [GO:0031410]; cytoplasmic vesicle membrane [GO:0030659]; cytosol [GO:0005829]; endosome [GO:0005768]; extracellular exosome [GO:0070062]; glutamatergic synapse [GO:0098978]; Golgi apparatus [GO:0005794]; intracellular membrane-bounded organelle […
Q13011	ECH1	23667000	cytosol [GO:0005829]; extracellular exosome [GO:0070062]; membrane [GO:0016020]; mitochondrion [GO:0005739]; peroxisomal matrix [GO:0005782]; peroxisome [GO:0005777]
P40199	CEACAM6	23150000	anchored component of membrane [GO:0031225]; apical plasma membrane [GO:0016324]; azurophil granule membrane [GO:0035577]; cell surface [GO:0009986]; extracellular space [GO:0005615]; plasma membrane [GO:0005886]
P30084	ECHS1	22624000	mitochondrial matrix [GO:0005759]; mitochondrion [GO:0005739]
P30048	PRDX3	21518000	cytoplasm [GO:0005737]; cytosol [GO:0005829]; early endosome [GO:0005769]; mitochondrial matrix [GO:0005759]; mitochondrion [GO:0005739]; protein-containing complex [GO:0032991]
P16435	POR	19215000	cytosol [GO:0005829]; endoplasmic reticulum membrane [GO:0005789]; integral component of membrane [GO:0016021]; intracellular membrane-bounded organelle [GO:0043231]; membrane [GO:0016020]; mitochondrion [GO:0005739]
P02788	LTF	18455000	cell surface [GO:0009986]; cytoplasm [GO:0005737]; early endosome [GO:0005769]; extracellular exosome [GO:0070062]; extracellular region [GO:0005576]; extracellular space [GO:0005615]; nucleus [GO:0005634]; phagocytic vesicle lumen [GO:0097013]; plasma membrane [GO:0005886]; protein-containing complex [GO:0032991]; recycling endosome [GO:0055037]; secretory granule [GO:0030141]; specific granule …
Q02218	OGDH	17839000	mitochondrial matrix [GO:0005759]; mitochondrial membrane [GO:0031966]; mitochondrion [GO:0005739]; nucleus [GO:0005634]; oxoglutarate dehydrogenase complex [GO:0045252]
Q9BS26	ERP44	17576000	cell surface [GO:0009986]; endoplasmic reticulum lumen [GO:0005788]; endoplasmic reticulum membrane [GO:0005789]; endoplasmic reticulum-Golgi intermediate compartment [GO:0005793]; extracellular exosome [GO:0070062]; extracellular region [GO:0005576]; specific granule lumen [GO:0035580]
P36957	DLST	15104000	cytosol [GO:0005829]; membrane [GO:0016020]; mitochondrial matrix [GO:0005759]; mitochondrion [GO:0005739]; nucleoplasm [GO:0005654]; nucleus [GO:0005634]; oxoglutarate dehydrogenase complex [GO:0045252]
P61026	RAB10	15101000	adherens junction [GO:0005912]; cilium [GO:0005929]; cytoplasmic vesicle membrane [GO:0030659]; cytoskeleton [GO:0005856]; cytosol [GO:0005829]; endoplasmic reticulum membrane [GO:0005789]; endoplasmic reticulum tubular network [GO:0071782]; endosome [GO:0005768]; exocytic vesicle [GO:0070382]; extracellular exosome [GO:0070062]; focal adhesion [GO:0005925]; Golgi apparatus [GO:0005794]; Golgi me…
P11279	LAMP1	14730000	autolysosome [GO:0044754]; autophagosome membrane [GO:0000421]; azurophil granule membrane [GO:0035577]; cytolytic granule membrane [GO:0101004]; cytoplasm [GO:0005737]; cytosol [GO:0005829]; endosome membrane [GO:0010008]; external side of plasma membrane [GO:0009897]; extracellular exosome [GO:0070062]; ficolin-1-rich granule membrane [GO:0101003]; integral component of plasma membrane [GO:0005…
P16615	ATP2A2	13610000	calcium ion-transporting ATPase complex [GO:0090534]; endoplasmic reticulum [GO:0005783]; endoplasmic reticulum membrane [GO:0005789]; integral component of membrane [GO:0016021]; integral component of plasma membrane [GO:0005887]; longitudinal sarcoplasmic reticulum [GO:0014801]; membrane [GO:0016020]; platelet dense tubular network membrane [GO:0031095]; ribbon synapse [GO:0097470]; sarcoplasmi…
P08559	PDHA1	13477000	mitochondrial matrix [GO:0005759]; mitochondrial pyruvate dehydrogenase complex [GO:0005967]; mitochondrion [GO:0005739]; nucleolus [GO:0005730]; nucleus [GO:0005634]; pyruvate dehydrogenase complex [GO:0045254]
P38117	ETFB	12371000	electron transfer flavoprotein complex [GO:0045251]; mitochondrial matrix [GO:0005759]; mitochondrion [GO:0005739]
Q9HAV7	GRPEL1	12247000	mitochondrial inner membrane [GO:0005743]; mitochondrial matrix [GO:0005759]; mitochondrion [GO:0005739]; nucleoplasm [GO:0005654]; PAM complex, Tim23 associated import motor [GO:0001405]; TIM23 mitochondrial import inner membrane translocase complex [GO:0005744]
Q99798	ACO2	11924000	cytosol [GO:0005829]; mitochondrial matrix [GO:0005759]; mitochondrion [GO:0005739]
P11177	PDHB	11559000	mitochondrial matrix [GO:0005759]; mitochondrial pyruvate dehydrogenase complex [GO:0005967]; mitochondrion [GO:0005739]; nucleoplasm [GO:0005654]; nucleus [GO:0005634]; pyruvate dehydrogenase complex [GO:0045254]
Q96RP9	GFM1	11179000	mitochondrial matrix [GO:0005759]; mitochondrion [GO:0005739]
Q15758	SLC1A5	11111000	basal plasma membrane [GO:0009925]; extracellular exosome [GO:0070062]; integral component of membrane [GO:0016021]; integral component of plasma membrane [GO:0005887]; melanosome [GO:0042470]; membrane [GO:0016020]; plasma membrane [GO:0005886]
Q8NFV4	ABHD11	11083000	mitochondrion [GO:0005739]
P61586	RHOA	10777000	apical junction complex [GO:0043296]; axon [GO:0030424]; cell cortex [GO:0005938]; cell junction [GO:0030054]; cell periphery [GO:0071944]; cell projection [GO:0042995]; cleavage furrow [GO:0032154]; cytoplasmic vesicle [GO:0031410]; cytoskeleton [GO:0005856]; cytosol [GO:0005829]; dendritic spine [GO:0043197]; endoplasmic reticulum membrane [GO:0005789]; endosome [GO:0005768]; extracellular exos…
P07954	FH	10259000	chromosome [GO:0005694]; cytoplasm [GO:0005737]; cytosol [GO:0005829]; extracellular exosome [GO:0070062]; mitochondrial matrix [GO:0005759]; mitochondrion [GO:0005739]; nucleus [GO:0005634]; site of double-strand break [GO:0035861]; tricarboxylic acid cycle enzyme complex [GO:0045239]
P31025	LCN1	10180000	extracellular region [GO:0005576]; extracellular space [GO:0005615]
P07195	LDHB	9002400	cytoplasm [GO:0005737]; cytosol [GO:0005829]; extracellular exosome [GO:0070062]; membrane [GO:0016020]; membrane raft [GO:0045121]; mitochondrial inner membrane [GO:0005743]; oxidoreductase complex [GO:1990204]
P51148	RAB5C	8779000	azurophil granule membrane [GO:0035577]; early endosome [GO:0005769]; early endosome membrane [GO:0031901]; endocytic vesicle [GO:0030139]; endosome [GO:0005768]; extracellular exosome [GO:0070062]; lipid droplet [GO:0005811]; lysosomal membrane [GO:0005765]; melanosome [GO:0042470]; plasma membrane [GO:0005886]
O00264	PGRMC1	8777400	cell body [GO:0044297]; endomembrane system [GO:0012505]; endoplasmic reticulum [GO:0005783]; integral component of plasma membrane [GO:0005887]; membrane [GO:0016020]; mitochondrial outer membrane [GO:0005741]; neuron projection [GO:0043005]; neuronal cell body [GO:0043025]; plasma membrane [GO:0005886]; smooth endoplasmic reticulum membrane [GO:0030868]; specific granule membrane [GO:0035579]; …
Q02790	FKBP4	8364000	axonal growth cone [GO:0044295]; cytoplasm [GO:0005737]; cytosol [GO:0005829]; extracellular exosome [GO:0070062]; microtubule [GO:0005874]; mitochondrion [GO:0005739]; neuronal cell body [GO:0043025]; nucleoplasm [GO:0005654]; perinuclear region of cytoplasm [GO:0048471]; protein-containing complex [GO:0032991]
Q99805	TM9SF2	7678000	cytoskeleton [GO:0005856]; endosome [GO:0005768]; endosome membrane [GO:0010008]; extracellular exosome [GO:0070062]; Golgi apparatus [GO:0005794]; integral component of plasma membrane [GO:0005887]; membrane [GO:0016020]
P06744	GPI	7537200	ciliary membrane [GO:0060170]; cytosol [GO:0005829]; extracellular exosome [GO:0070062]; extracellular region [GO:0005576]; ficolin-1-rich granule lumen [GO:1904813]; membrane [GO:0016020]; neuron projection [GO:0043005]; nucleoplasm [GO:0005654]; plasma membrane [GO:0005886]; secretory granule lumen [GO:0034774]
O95571	ETHE1	7389700	cytoplasm [GO:0005737]; mitochondrial matrix [GO:0005759]; mitochondrion [GO:0005739]; nucleoplasm [GO:0005654]
P31944	CASP14	7341500	cornified envelope [GO:0001533]; cytoplasm [GO:0005737]; cytosol [GO:0005829]; keratin filament [GO:0045095]; mitochondrion [GO:0005739]; nucleoplasm [GO:0005654]; nucleus [GO:0005634]
P30837	ALDH1B1	7099100	cytosol [GO:0005829]; mitochondrial matrix [GO:0005759]; mitochondrion [GO:0005739]; nucleoplasm [GO:0005654]
P36776	LONP1	6876900	cytosol [GO:0005829]; membrane [GO:0016020]; mitochondrial matrix [GO:0005759]; mitochondrial nucleoid [GO:0042645]; mitochondrion [GO:0005739]; nucleoplasm [GO:0005654]
P61626	LYZ	6860300	azurophil granule lumen [GO:0035578]; extracellular exosome [GO:0070062]; extracellular region [GO:0005576]; extracellular space [GO:0005615]; specific granule lumen [GO:0035580]; tertiary granule lumen [GO:1904724]
P31930	UQCRC1	6833700	mitochondrial inner membrane [GO:0005743]; mitochondrial respirasome [GO:0005746]; mitochondrial respiratory chain complex III [GO:0005750]; mitochondrion [GO:0005739]
P34897	SHMT2	6642000	BRISC complex [GO:0070552]; cytoplasm [GO:0005737]; cytosol [GO:0005829]; extracellular exosome [GO:0070062]; microtubule cytoskeleton [GO:0015630]; mitochondrial inner membrane [GO:0005743]; mitochondrial intermembrane space [GO:0005758]; mitochondrial matrix [GO:0005759]; mitochondrial nucleoid [GO:0042645]; mitochondrion [GO:0005739]; nucleus [GO:0005634]
Q9Y230	RUVBL2	6520800	centrosome [GO:0005813]; chaperone complex [GO:0101031]; cytoplasm [GO:0005737]; cytosol [GO:0005829]; dynein axonemal particle [GO:0120293]; euchromatin [GO:0000791]; extracellular exosome [GO:0070062]; Ino80 complex [GO:0031011]; membrane [GO:0016020]; MLL1 complex [GO:0071339]; NuA4 histone acetyltransferase complex [GO:0035267]; nuclear matrix [GO:0016363]; nucleoplasm [GO:0005654]; nucleosom…
Q96HE7	ERO1A	5877300	dendrite [GO:0030425]; endoplasmic reticulum [GO:0005783]; endoplasmic reticulum lumen [GO:0005788]; endoplasmic reticulum membrane [GO:0005789]; extracellular space [GO:0005615]; Golgi lumen [GO:0005796]; intracellular membrane-bounded organelle [GO:0043231]; membrane [GO:0016020]
P11310	ACADM	5874300	axon [GO:0030424]; cytoplasm [GO:0005737]; mitochondrial matrix [GO:0005759]; mitochondrial membrane [GO:0031966]; mitochondrion [GO:0005739]; nucleus [GO:0005634]
P01891	HLA-A	5764500	cell surface [GO:0009986]; early endosome membrane [GO:0031901]; endoplasmic reticulum [GO:0005783]; endoplasmic reticulum exit site [GO:0070971]; endoplasmic reticulum membrane [GO:0005789]; ER to Golgi transport vesicle membrane [GO:0012507]; extracellular exosome [GO:0070062]; Golgi apparatus [GO:0005794]; Golgi medial cisterna [GO:0005797]; Golgi membrane [GO:0000139]; integral component of l…
Q9HCC0	MCCC2	5636400	3-methylcrotonyl-CoA carboxylase complex, mitochondrial [GO:0002169]; cytosol [GO:0005829]; methylcrotonoyl-CoA carboxylase complex [GO:1905202]; mitochondrial matrix [GO:0005759]; mitochondrion [GO:0005739]
P07602	PSAP	5515000	azurophil granule membrane [GO:0035577]; collagen-containing extracellular matrix [GO:0062023]; extracellular exosome [GO:0070062]; extracellular region [GO:0005576]; extracellular space [GO:0005615]; intracellular membrane-bounded organelle [GO:0043231]; late endosome [GO:0005770]; lysosomal lumen [GO:0043202]; lysosomal membrane [GO:0005765]; lysosome [GO:0005764]; plasma membrane [GO:0005886]
P45973	CBX5	5106400	chromocenter [GO:0010369]; chromosome, telomeric region [GO:0000781]; heterochromatin [GO:0000792]; histone deacetylase complex [GO:0000118]; histone methyltransferase complex [GO:0035097]; kinetochore [GO:0000776]; nuclear envelope [GO:0005635]; nucleolus [GO:0005730]; nucleoplasm [GO:0005654]; nucleus [GO:0005634]; pericentric heterochromatin [GO:0005721]; protein-containing complex [GO:0032991…
P05109	S100A8	5082900	collagen-containing extracellular matrix [GO:0062023]; cytoskeleton [GO:0005856]; cytosol [GO:0005829]; extracellular exosome [GO:0070062]; extracellular region [GO:0005576]; extracellular space [GO:0005615]; intermediate filament cytoskeleton [GO:0045111]; nucleus [GO:0005634]; plasma membrane [GO:0005886]; secretory granule lumen [GO:0034774]
Q92598	HSPH1	5056800	cytoplasm [GO:0005737]; cytosol [GO:0005829]; endocytic vesicle lumen [GO:0071682]; extracellular exosome [GO:0070062]; extracellular region [GO:0005576]; microtubule [GO:0005874]; nucleoplasm [GO:0005654]; nucleus [GO:0005634]; protein-containing complex [GO:0032991]
Q99797	MIPEP	4987500	mitochondrial matrix [GO:0005759]; mitochondrion [GO:0005739]
Q9NP72	RAB18	4947900	apical plasma membrane [GO:0016324]; cytosol [GO:0005829]; endoplasmic reticulum membrane [GO:0005789]; endoplasmic reticulum tubular network [GO:0071782]; Golgi apparatus [GO:0005794]; lipid droplet [GO:0005811]; plasma membrane [GO:0005886]; secretory granule membrane [GO:0030667]
P30044	PRDX5	4929700	cytoplasm [GO:0005737]; cytoplasmic vesicle [GO:0031410]; cytosol [GO:0005829]; extracellular exosome [GO:0070062]; extracellular space [GO:0005615]; intracellular membrane-bounded organelle [GO:0043231]; mitochondrial matrix [GO:0005759]; mitochondrion [GO:0005739]; nucleus [GO:0005634]; perinuclear region of cytoplasm [GO:0048471]; peroxisomal matrix [GO:0005782]; peroxisome [GO:0005777]
Q9UJZ1	STOML2	4741900	cytoskeleton [GO:0005856]; extrinsic component of plasma membrane [GO:0019897]; membrane raft [GO:0045121]; mitochondrial inner membrane [GO:0005743]; mitochondrial intermembrane space [GO:0005758]; mitochondrion [GO:0005739]; plasma membrane [GO:0005886]
P16444	DPEP1	4709200	anchored component of membrane [GO:0031225]; apical part of cell [GO:0045177]; apical plasma membrane [GO:0016324]; cell junction [GO:0030054]; extracellular exosome [GO:0070062]; extracellular space [GO:0005615]; microvillus membrane [GO:0031528]; nucleoplasm [GO:0005654]; plasma membrane [GO:0005886]
Q9NQC3	RTN4	4520000	anchoring junction [GO:0070161]; cell junction [GO:0030054]; endoplasmic reticulum [GO:0005783]; endoplasmic reticulum membrane [GO:0005789]; endoplasmic reticulum tubular network [GO:0071782]; endoplasmic reticulum tubular network membrane [GO:0098826]; integral component of endoplasmic reticulum membrane [GO:0030176]; neuron projection [GO:0043005]; nuclear envelope [GO:0005635]; plasma membran…
Q02818	NUCB1	4465600	endoplasmic reticulum lumen [GO:0005788]; endoplasmic reticulum-Golgi intermediate compartment [GO:0005793]; extracellular exosome [GO:0070062]; extracellular space [GO:0005615]; Golgi apparatus [GO:0005794]; membrane [GO:0016020]
O00299	CLIC1	4367700	blood microparticle [GO:0072562]; brush border [GO:0005903]; chloride channel complex [GO:0034707]; cytoplasm [GO:0005737]; extracellular exosome [GO:0070062]; extracellular space [GO:0005615]; membrane [GO:0016020]; mitochondrion [GO:0005739]; nuclear envelope [GO:0005635]; nuclear membrane [GO:0031965]; nucleus [GO:0005634]; perinuclear region of cytoplasm [GO:0048471]; plasma membrane [GO:0005…
Q99536	VAT1	4342300	azurophil granule lumen [GO:0035578]; extracellular exosome [GO:0070062]; extracellular region [GO:0005576]; integral component of membrane [GO:0016021]; mitochondrial outer membrane [GO:0005741]
Q4G0N4	NADK2	4338300	mitochondrial matrix [GO:0005759]; mitochondrion [GO:0005739]
P22307	SCP2	4118000	cytoplasm [GO:0005737]; cytosol [GO:0005829]; endoplasmic reticulum [GO:0005783]; intracellular membrane-bounded organelle [GO:0043231]; membrane [GO:0016020]; mitochondrion [GO:0005739]; nucleoplasm [GO:0005654]; peroxisomal matrix [GO:0005782]; peroxisome [GO:0005777]; protein-containing complex [GO:0032991]
P10515	DLAT	4007700	intracellular membrane-bounded organelle [GO:0043231]; mitochondrial matrix [GO:0005759]; mitochondrial pyruvate dehydrogenase complex [GO:0005967]; mitochondrion [GO:0005739]; pyruvate dehydrogenase complex [GO:0045254]
Q8NBS9	TXNDC5	3935400	azurophil granule lumen [GO:0035578]; endoplasmic reticulum [GO:0005783]; endoplasmic reticulum lumen [GO:0005788]; extracellular exosome [GO:0070062]; extracellular region [GO:0005576]; lysosomal lumen [GO:0043202]
Q13185	CBX3	3816800	chromatin [GO:0000785]; chromatin lock complex [GO:0061793]; chromosome, centromeric region [GO:0000775]; chromosome, telomeric region [GO:0000781]; condensed chromosome, centromeric region [GO:0000779]; euchromatin [GO:0000791]; heterochromatin [GO:0000792]; nuclear envelope [GO:0005635]; nuclear inner membrane [GO:0005637]; nucleoplasm [GO:0005654]; nucleus [GO:0005634]; pericentric heterochrom…
O43852	CALU	3712900	endoplasmic reticulum [GO:0005783]; endoplasmic reticulum lumen [GO:0005788]; endoplasmic reticulum membrane [GO:0005789]; extracellular region [GO:0005576]; Golgi apparatus [GO:0005794]; melanosome [GO:0042470]; membrane [GO:0016020]; sarcoplasmic reticulum lumen [GO:0033018]
P46459	NSF	3544300	cytosol [GO:0005829]; dendritic shaft [GO:0043198]; Golgi apparatus [GO:0005794]; Golgi stack [GO:0005795]; lysosomal membrane [GO:0005765]; plasma membrane [GO:0005886]; postsynaptic density [GO:0014069]
Q9NYU2	UGGT1	3405500	endoplasmic reticulum [GO:0005783]; endoplasmic reticulum lumen [GO:0005788]; endoplasmic reticulum quality control compartment [GO:0044322]; endoplasmic reticulum-Golgi intermediate compartment [GO:0005793]; extracellular exosome [GO:0070062]; protein-containing complex [GO:0032991]
P17301	ITGA2	3281600	axon terminus [GO:0043679]; basal part of cell [GO:0045178]; cell surface [GO:0009986]; external side of plasma membrane [GO:0009897]; focal adhesion [GO:0005925]; integrin alpha2-beta1 complex [GO:0034666]; integrin complex [GO:0008305]; nucleus [GO:0005634]; perinuclear region of cytoplasm [GO:0048471]; plasma membrane [GO:0005886]
Q14165	MLEC	3201900	endoplasmic reticulum [GO:0005783]; endoplasmic reticulum membrane [GO:0005789]; integral component of membrane [GO:0016021]; membrane [GO:0016020]; oligosaccharyltransferase complex [GO:0008250]; plasma membrane [GO:0005886]; specific granule membrane [GO:0035579]
Q8N1F7	NUP93	2761300	centrosome [GO:0005813]; cytosol [GO:0005829]; membrane [GO:0016020]; nuclear envelope [GO:0005635]; nuclear membrane [GO:0031965]; nuclear periphery [GO:0034399]; nuclear pore [GO:0005643]
O75694	NUP155	2553600	cytosol [GO:0005829]; membrane [GO:0016020]; nuclear envelope [GO:0005635]; nuclear membrane [GO:0031965]; nuclear pore [GO:0005643]; nuclear pore inner ring [GO:0044611]
O43615	TIMM44	2151600	fibrillar center [GO:0001650]; mitochondrial inner membrane [GO:0005743]; mitochondrial matrix [GO:0005759]; mitochondrion [GO:0005739]; TIM23 mitochondrial import inner membrane translocase complex [GO:0005744]
Q92665	MRPS31	2077500	mitochondrial inner membrane [GO:0005743]; mitochondrial small ribosomal subunit [GO:0005763]; mitochondrion [GO:0005739]; nucleolus [GO:0005730]
Q14651	PLS1	2054700	actin filament [GO:0005884]; actin filament bundle [GO:0032432]; brush border [GO:0005903]; cytoplasm [GO:0005737]; extracellular exosome [GO:0070062]; stereocilium [GO:0032420]; terminal web [GO:1990357]
P04279	SEMG1	1912200	extracellular exosome [GO:0070062]; extracellular region [GO:0005576]; extracellular space [GO:0005615]; nucleus [GO:0005634]; protein-containing complex [GO:0032991]
P54819	AK2	1832000	cytoplasm [GO:0005737]; extracellular exosome [GO:0070062]; mitochondrial intermembrane space [GO:0005758]; mitochondrion [GO:0005739]; sperm mitochondrial sheath [GO:0097226]
Q8NBJ5	COLGALT1	1311000	endoplasmic reticulum lumen [GO:0005788]; membrane [GO:0016020]

## Sheet: 3_HK-2
prey	preyGene	HK-2 Intensity	Gene Ontology (cellular component)
O14950	MYL12B	176540000	apical part of cell [GO:0045177]; brush border [GO:0005903]; cell cortex [GO:0005938]; cytoplasm [GO:0005737]; cytosol [GO:0005829]; extracellular exosome [GO:0070062]; myofibril [GO:0030016]; myosin II complex [GO:0016460]; stress fiber [GO:0001725]; Z disc [GO:0030018]
P30048	PRDX3	63601000	cytoplasm [GO:0005737]; cytosol [GO:0005829]; early endosome [GO:0005769]; mitochondrial matrix [GO:0005759]; mitochondrion [GO:0005739]; protein-containing complex [GO:0032991]
P20674	COX5A	56840000	mitochondrial inner membrane [GO:0005743]; mitochondrial membrane [GO:0031966]; mitochondrial respiratory chain complex IV [GO:0005751]
P13073	COX4I1	54847000	cytosol [GO:0005829]; integral component of membrane [GO:0016021]; membrane [GO:0016020]; mitochondrial inner membrane [GO:0005743]; mitochondrial membrane [GO:0031966]; mitochondrial respiratory chain complex IV [GO:0005751]; mitochondrion [GO:0005739]; nucleoplasm [GO:0005654]
Q9UBI6	GNG12	54078000	extracellular exosome [GO:0070062]; heterotrimeric G-protein complex [GO:0005834]; plasma membrane [GO:0005886]
P10909	CLU	51715000	apical dendrite [GO:0097440]; blood microparticle [GO:0072562]; cell surface [GO:0009986]; chromaffin granule [GO:0042583]; collagen-containing extracellular matrix [GO:0062023]; cytoplasm [GO:0005737]; cytosol [GO:0005829]; extracellular exosome [GO:0070062]; extracellular region [GO:0005576]; extracellular space [GO:0005615]; Golgi apparatus [GO:0005794]; intracellular membrane-bounded organell…
Q9UJZ1	STOML2	50350000	cytoskeleton [GO:0005856]; extrinsic component of plasma membrane [GO:0019897]; membrane raft [GO:0045121]; mitochondrial inner membrane [GO:0005743]; mitochondrial intermembrane space [GO:0005758]; mitochondrion [GO:0005739]; plasma membrane [GO:0005886]
P14854	COX6B1	48244000	mitochondrial inner membrane [GO:0005743]; mitochondrial membrane [GO:0031966]; mitochondrial respiratory chain complex IV [GO:0005751]; mitochondrion [GO:0005739]; respiratory chain complex IV [GO:0045277]
P07195	LDHB	47714000	cytoplasm [GO:0005737]; cytosol [GO:0005829]; extracellular exosome [GO:0070062]; membrane [GO:0016020]; membrane raft [GO:0045121]; mitochondrial inner membrane [GO:0005743]; oxidoreductase complex [GO:1990204]
P34897	SHMT2	46673000	BRISC complex [GO:0070552]; cytoplasm [GO:0005737]; cytosol [GO:0005829]; extracellular exosome [GO:0070062]; microtubule cytoskeleton [GO:0015630]; mitochondrial inner membrane [GO:0005743]; mitochondrial intermembrane space [GO:0005758]; mitochondrial matrix [GO:0005759]; mitochondrial nucleoid [GO:0042645]; mitochondrion [GO:0005739]; nucleus [GO:0005634]
P51149	RAB7A	45316000	alveolar lamellar body [GO:0097208]; anchored component of synaptic vesicle membrane [GO:0098993]; autophagosome membrane [GO:0000421]; cytosol [GO:0005829]; endosome membrane [GO:0010008]; extracellular exosome [GO:0070062]; extrinsic component of lysosome membrane [GO:0032419]; Golgi apparatus [GO:0005794]; late endosome [GO:0005770]; late endosome membrane [GO:0031902]; lipid droplet [GO:00058…
Q96HS1	PGAM5	43023000	integral component of membrane [GO:0016021]; mitochondrial outer membrane [GO:0005741]; mitochondrion [GO:0005739]
P22392	NME2	41974000	cell periphery [GO:0071944]; cytoplasm [GO:0005737]; cytosol [GO:0005829]; extracellular exosome [GO:0070062]; extracellular region [GO:0005576]; ficolin-1-rich granule lumen [GO:1904813]; lamellipodium [GO:0030027]; nucleus [GO:0005634]; perinuclear region of cytoplasm [GO:0048471]; ruffle [GO:0001726]; secretory granule lumen [GO:0034774]
Q03135	CAV1	40645000	acrosomal membrane [GO:0002080]; apical plasma membrane [GO:0016324]; basolateral plasma membrane [GO:0016323]; caveola [GO:0005901]; caveolar macromolecular signaling complex [GO:0002095]; cell cortex [GO:0005938]; cilium [GO:0005929]; cytoplasmic vesicle [GO:0031410]; early endosome membrane [GO:0031901]; endocytic vesicle membrane [GO:0030666]; endoplasmic reticulum [GO:0005783]; endoplasmic r…
O00264	PGRMC1	40633000	cell body [GO:0044297]; endomembrane system [GO:0012505]; endoplasmic reticulum [GO:0005783]; integral component of plasma membrane [GO:0005887]; membrane [GO:0016020]; mitochondrial outer membrane [GO:0005741]; neuron projection [GO:0043005]; neuronal cell body [GO:0043025]; plasma membrane [GO:0005886]; smooth endoplasmic reticulum membrane [GO:0030868]; specific granule membrane [GO:0035579]; …
Q9Y6H1	CHCHD2	40033000	mitochondrial intermembrane space [GO:0005758]; mitochondrion [GO:0005739]; nucleus [GO:0005634]
O75947	ATP5H	39037000	mitochondrial inner membrane [GO:0005743]; mitochondrial proton-transporting ATP synthase complex [GO:0005753]; mitochondrial proton-transporting ATP synthase, stator stalk [GO:0000274]; mitochondrion [GO:0005739]
P39656	DDOST	36881000	azurophil granule membrane [GO:0035577]; endoplasmic reticulum [GO:0005783]; endoplasmic reticulum membrane [GO:0005789]; integral component of membrane [GO:0016021]; intracellular membrane-bounded organelle [GO:0043231]; membrane [GO:0016020]; oligosaccharyltransferase complex [GO:0008250]; plasma membrane [GO:0005886]
P05556	ITGB1	35138000	cell surface [GO:0009986]; cleavage furrow [GO:0032154]; cytoplasm [GO:0005737]; dendritic spine [GO:0043197]; endosome membrane [GO:0010008]; external side of plasma membrane [GO:0009897]; extracellular exosome [GO:0070062]; filopodium [GO:0030175]; focal adhesion [GO:0005925]; glial cell projection [GO:0097386]; glutamatergic synapse [GO:0098978]; integral component of synaptic membrane [GO:009…
P16070	CD44	33610000	apical plasma membrane [GO:0016324]; basolateral plasma membrane [GO:0016323]; cell projection [GO:0042995]; cell surface [GO:0009986]; cytosol [GO:0005829]; extracellular exosome [GO:0070062]; focal adhesion [GO:0005925]; Golgi apparatus [GO:0005794]; integral component of plasma membrane [GO:0005887]; lamellipodium membrane [GO:0031258]; macrophage migration inhibitory factor receptor complex […
P35613	BSG	32257000	acrosomal membrane [GO:0002080]; axon [GO:0030424]; basolateral plasma membrane [GO:0016323]; endoplasmic reticulum membrane [GO:0005789]; endosome [GO:0005768]; extracellular exosome [GO:0070062]; focal adhesion [GO:0005925]; Golgi membrane [GO:0000139]; integral component of plasma membrane [GO:0005887]; intracellular membrane-bounded organelle [GO:0043231]; melanosome [GO:0042470]; membrane [G…
P51571	SSR4	30357000	endomembrane system [GO:0012505]; endoplasmic reticulum [GO:0005783]; extracellular exosome [GO:0070062]; integral component of membrane [GO:0016021]; Sec61 translocon complex [GO:0005784]
P26038	MSN	28744000	adherens junction [GO:0005912]; apical part of cell [GO:0045177]; apical plasma membrane [GO:0016324]; basolateral plasma membrane [GO:0016323]; blood microparticle [GO:0072562]; cell periphery [GO:0071944]; cell surface [GO:0009986]; cytoplasm [GO:0005737]; cytoskeleton [GO:0005856]; cytosol [GO:0005829]; extracellular exosome [GO:0070062]; extracellular space [GO:0005615]; filopodium [GO:003017…
P29692	EEF1D	23810000	cytoplasm [GO:0005737]; cytosol [GO:0005829]; eukaryotic translation elongation factor 1 complex [GO:0005853]; fibrillar center [GO:0001650]; nucleoplasm [GO:0005654]; nucleus [GO:0005634]
O43852	CALU	22496000	endoplasmic reticulum [GO:0005783]; endoplasmic reticulum lumen [GO:0005788]; endoplasmic reticulum membrane [GO:0005789]; extracellular region [GO:0005576]; Golgi apparatus [GO:0005794]; melanosome [GO:0042470]; membrane [GO:0016020]; sarcoplasmic reticulum lumen [GO:0033018]
P61586	RHOA	22453000	apical junction complex [GO:0043296]; axon [GO:0030424]; cell cortex [GO:0005938]; cell junction [GO:0030054]; cell periphery [GO:0071944]; cell projection [GO:0042995]; cleavage furrow [GO:0032154]; cytoplasmic vesicle [GO:0031410]; cytoskeleton [GO:0005856]; cytosol [GO:0005829]; dendritic spine [GO:0043197]; endoplasmic reticulum membrane [GO:0005789]; endosome [GO:0005768]; extracellular exos…
Q9Y512	SAMM50	22369000	extracellular exosome [GO:0070062]; integral component of membrane [GO:0016021]; MIB complex [GO:0140275]; mitochondrial outer membrane [GO:0005741]; mitochondrion [GO:0005739]; SAM complex [GO:0001401]
P62888	RPL30	22171000	cytoplasm [GO:0005737]; cytosol [GO:0005829]; cytosolic large ribosomal subunit [GO:0022625]; cytosolic ribosome [GO:0022626]; extracellular exosome [GO:0070062]; focal adhesion [GO:0005925]; membrane [GO:0016020]; nucleus [GO:0005634]; polysomal ribosome [GO:0042788]; postsynaptic density [GO:0014069]
P50402	EMD	21962000	cytoplasm [GO:0005737]; cytosol [GO:0005829]; endoplasmic reticulum [GO:0005783]; integral component of membrane [GO:0016021]; membrane [GO:0016020]; microtubule [GO:0005874]; nuclear envelope [GO:0005635]; nuclear inner membrane [GO:0005637]; nuclear membrane [GO:0031965]; nuclear outer membrane [GO:0005640]; nucleoplasm [GO:0005654]; spindle [GO:0005819]
P00387	CYB5R3	21628000	azurophil granule lumen [GO:0035578]; cytoplasm [GO:0005737]; endoplasmic reticulum [GO:0005783]; endoplasmic reticulum membrane [GO:0005789]; extracellular region [GO:0005576]; hemoglobin complex [GO:0005833]; lipid droplet [GO:0005811]; membrane [GO:0016020]; mitochondrial outer membrane [GO:0005741]; mitochondrion [GO:0005739]; nitric-oxide synthase complex [GO:1903958]
Q9NX40	OCIAD1	19003000	endosome [GO:0005768]; Golgi apparatus [GO:0005794]; lysosome [GO:0005764]; membrane [GO:0016020]
P42224	STAT1	18214000	axon [GO:0030424]; chromatin [GO:0000785]; cytoplasm [GO:0005737]; cytosol [GO:0005829]; dendrite [GO:0030425]; ISGF3 complex [GO:0070721]; nucleolus [GO:0005730]; nucleoplasm [GO:0005654]; nucleus [GO:0005634]; perinuclear region of cytoplasm [GO:0048471]; protein-containing complex [GO:0032991]; RNA polymerase II transcription regulator complex [GO:0090575]
P09936	UCHL1	17014000	axon cytoplasm [GO:1904115]; cytoplasm [GO:0005737]; cytosol [GO:0005829]; endoplasmic reticulum membrane [GO:0005789]; neuron projection terminus [GO:0044306]; neuronal cell body [GO:0043025]; nucleoplasm [GO:0005654]
P30040	ERP29	16409000	cell surface [GO:0009986]; endoplasmic reticulum [GO:0005783]; endoplasmic reticulum lumen [GO:0005788]; melanosome [GO:0042470]; membrane [GO:0016020]; smooth endoplasmic reticulum [GO:0005790]; transport vesicle [GO:0030133]
O75396	SEC22B	15812000	endoplasmic reticulum membrane [GO:0005789]; endoplasmic reticulum-Golgi intermediate compartment [GO:0005793]; endoplasmic reticulum-Golgi intermediate compartment membrane [GO:0033116]; ER to Golgi transport vesicle membrane [GO:0012507]; Golgi membrane [GO:0000139]; integral component of membrane [GO:0016021]; melanosome [GO:0042470]; phagocytic vesicle membrane [GO:0030670]; SNARE complex [GO…
P13674	P4HA1	15769000	endoplasmic reticulum [GO:0005783]; endoplasmic reticulum lumen [GO:0005788]; intracellular membrane-bounded organelle [GO:0043231]; membrane [GO:0016020]; mitochondrion [GO:0005739]; procollagen-proline 4-dioxygenase complex [GO:0016222]
P36542	ATP5C1	15708000	membrane [GO:0016020]; mitochondrial inner membrane [GO:0005743]; mitochondrial matrix [GO:0005759]; mitochondrial proton-transporting ATP synthase complex [GO:0005753]; mitochondrial proton-transporting ATP synthase complex, catalytic sector F(1) [GO:0000275]; mitochondrion [GO:0005739]
Q15293	RCN1	14642000	endoplasmic reticulum [GO:0005783]; endoplasmic reticulum lumen [GO:0005788]
P49257	LMAN1	14273000	collagen-containing extracellular matrix [GO:0062023]; COPII-coated ER to Golgi transport vesicle [GO:0030134]; endoplasmic reticulum [GO:0005783]; endoplasmic reticulum membrane [GO:0005789]; endoplasmic reticulum-Golgi intermediate compartment [GO:0005793]; endoplasmic reticulum-Golgi intermediate compartment membrane [GO:0033116]; ER to Golgi transport vesicle membrane [GO:0012507]; extracellu…
P51148	RAB5C	12897000	azurophil granule membrane [GO:0035577]; early endosome [GO:0005769]; early endosome membrane [GO:0031901]; endocytic vesicle [GO:0030139]; endosome [GO:0005768]; extracellular exosome [GO:0070062]; lipid droplet [GO:0005811]; lysosomal membrane [GO:0005765]; melanosome [GO:0042470]; plasma membrane [GO:0005886]
P48735	IDH2	12879000	cytosol [GO:0005829]; extracellular exosome [GO:0070062]; mitochondrial matrix [GO:0005759]; mitochondrion [GO:0005739]; peroxisome [GO:0005777]
Q70UQ0	IKBIP	12536000	endoplasmic reticulum [GO:0005783]; endoplasmic reticulum membrane [GO:0005789]; integral component of membrane [GO:0016021]; membrane [GO:0016020]
Q7Z434	MAVS	11824000	integral component of membrane [GO:0016021]; mitochondrial membrane [GO:0031966]; mitochondrial outer membrane [GO:0005741]; mitochondrion [GO:0005739]; peroxisomal membrane [GO:0005778]; ubiquitin ligase complex [GO:0000151]
P31930	UQCRC1	10805000	mitochondrial inner membrane [GO:0005743]; mitochondrial respirasome [GO:0005746]; mitochondrial respiratory chain complex III [GO:0005750]; mitochondrion [GO:0005739]
P63241	EIF5A	10796000	annulate lamellae [GO:0005642]; cytoplasm [GO:0005737]; cytosol [GO:0005829]; endoplasmic reticulum membrane [GO:0005789]; membrane [GO:0016020]; nuclear pore [GO:0005643]; nucleus [GO:0005634]
Q6NUK1	SLC25A24	10639000	integral component of membrane [GO:0016021]; mitochondrial inner membrane [GO:0005743]; mitochondrion [GO:0005739]
P61981	YWHAG	10566000	cytoplasm [GO:0005737]; cytosol [GO:0005829]; extracellular exosome [GO:0070062]; focal adhesion [GO:0005925]; membrane [GO:0016020]; presynapse [GO:0098793]
P18206	VCL	10395000	adherens junction [GO:0005912]; brush border [GO:0005903]; cell-cell contact zone [GO:0044291]; cell-cell junction [GO:0005911]; cell-substrate junction [GO:0030055]; costamere [GO:0043034]; cytoplasm [GO:0005737]; cytoskeleton [GO:0005856]; cytosol [GO:0005829]; extracellular exosome [GO:0070062]; extracellular region [GO:0005576]; extracellular vesicle [GO:1903561]; fascia adherens [GO:0005916]…
O00469	PLOD2	10058000	endoplasmic reticulum [GO:0005783]; endoplasmic reticulum membrane [GO:0005789]; extracellular exosome [GO:0070062]; rough endoplasmic reticulum membrane [GO:0030867]
Q2TB90	HKDC1	9222000	cytoplasm [GO:0005737]; cytosol [GO:0005829]; mitochondrial membrane [GO:0031966]; mitochondrion [GO:0005739]
P11047	LAMC1	8356800	basement membrane [GO:0005604]; collagen-containing extracellular matrix [GO:0062023]; endoplasmic reticulum lumen [GO:0005788]; extracellular exosome [GO:0070062]; extracellular region [GO:0005576]; extracellular space [GO:0005615]; laminin-1 complex [GO:0005606]; laminin-10 complex [GO:0043259]; laminin-11 complex [GO:0043260]; protein complex involved in cell-matrix adhesion [GO:0098637]
P61224	RAP1B	8238500	azurophil granule membrane [GO:0035577]; cell-cell junction [GO:0005911]; cytosol [GO:0005829]; extracellular exosome [GO:0070062]; lipid droplet [GO:0005811]; membrane [GO:0016020]; plasma membrane [GO:0005886]
Q16658	FSCN1	7439800	actin cytoskeleton [GO:0015629]; cell cortex [GO:0005938]; cell projection membrane [GO:0031253]; cell-cell junction [GO:0005911]; cytoplasm [GO:0005737]; cytoskeleton [GO:0005856]; cytosol [GO:0005829]; extracellular exosome [GO:0070062]; filopodium [GO:0030175]; growth cone [GO:0030426]; lamellipodium [GO:0030027]; microspike [GO:0044393]; microvillus [GO:0005902]; podosome [GO:0002102]; ruffle…
P05106	ITGB3	6854100	alpha9-beta1 integrin-ADAM8 complex [GO:0071133]; alphav-beta3 integrin-HMGB1 complex [GO:0035868]; alphav-beta3 integrin-IGF-1-IGF1R complex [GO:0035867]; alphav-beta3 integrin-PKCalpha complex [GO:0035866]; alphav-beta3 integrin-vitronectin complex [GO:0071062]; apical plasma membrane [GO:0016324]; cell surface [GO:0009986]; cell-cell junction [GO:0005911]; external side of plasma membrane [GO:…
Q86UP2	KTN1	5082900	endoplasmic reticulum [GO:0005783]; endoplasmic reticulum lumen [GO:0005788]; endoplasmic reticulum membrane [GO:0005789]; integral component of endoplasmic reticulum membrane [GO:0030176]; integral component of membrane [GO:0016021]; integral component of plasma membrane [GO:0005887]; membrane [GO:0016020]

## Sheet: 4_Caco-2
prey	preyGene	Caco-2 Intensity	Gene Ontology (cellular component)
P07195	LDHB	104870000	cytoplasm [GO:0005737]; cytosol [GO:0005829]; extracellular exosome [GO:0070062]; membrane [GO:0016020]; membrane raft [GO:0045121]; mitochondrial inner membrane [GO:0005743]; oxidoreductase complex [GO:1990204]
P22392	NME2	36435000	cell periphery [GO:0071944]; cytoplasm [GO:0005737]; cytosol [GO:0005829]; extracellular exosome [GO:0070062]; extracellular region [GO:0005576]; ficolin-1-rich granule lumen [GO:1904813]; lamellipodium [GO:0030027]; nucleus [GO:0005634]; perinuclear region of cytoplasm [GO:0048471]; ruffle [GO:0001726]; secretory granule lumen [GO:0034774]
P30048	PRDX3	32861000	cytoplasm [GO:0005737]; cytosol [GO:0005829]; early endosome [GO:0005769]; mitochondrial matrix [GO:0005759]; mitochondrion [GO:0005739]; protein-containing complex [GO:0032991]
P23526	AHCY	29684000	cytosol [GO:0005829]; extracellular exosome [GO:0070062]; melanosome [GO:0042470]; neuron projection [GO:0043005]; nucleus [GO:0005634]
P62820	RAB1A	24364000	cytosol [GO:0005829]; early endosome [GO:0005769]; endoplasmic reticulum [GO:0005783]; extracellular exosome [GO:0070062]; Golgi apparatus [GO:0005794]; Golgi membrane [GO:0000139]; melanosome [GO:0042470]; transport vesicle membrane [GO:0030658]
P12429	ANXA3	20904000	axon [GO:0030424]; cytoplasm [GO:0005737]; dendrite [GO:0030425]; extracellular exosome [GO:0070062]; membrane [GO:0016020]; neuronal cell body [GO:0043025]; phagocytic vesicle membrane [GO:0030670]; plasma membrane [GO:0005886]; specific granule [GO:0042581]
P07954	FH	18973000	chromosome [GO:0005694]; cytoplasm [GO:0005737]; cytosol [GO:0005829]; extracellular exosome [GO:0070062]; mitochondrial matrix [GO:0005759]; mitochondrion [GO:0005739]; nucleus [GO:0005634]; site of double-strand break [GO:0035861]; tricarboxylic acid cycle enzyme complex [GO:0045239]
P00441	SOD1	18302000	axon cytoplasm [GO:1904115]; cytoplasm [GO:0005737]; cytoplasmic vesicle [GO:0031410]; cytosol [GO:0005829]; dendrite cytoplasm [GO:0032839]; dense core granule [GO:0031045]; extracellular exosome [GO:0070062]; extracellular region [GO:0005576]; extracellular space [GO:0005615]; lysosome [GO:0005764]; mitochondrial intermembrane space [GO:0005758]; mitochondrial matrix [GO:0005759]; mitochondrion…
O00299	CLIC1	17802000	blood microparticle [GO:0072562]; brush border [GO:0005903]; chloride channel complex [GO:0034707]; cytoplasm [GO:0005737]; extracellular exosome [GO:0070062]; extracellular space [GO:0005615]; membrane [GO:0016020]; mitochondrion [GO:0005739]; nuclear envelope [GO:0005635]; nuclear membrane [GO:0031965]; nucleus [GO:0005634]; perinuclear region of cytoplasm [GO:0048471]; plasma membrane [GO:0005…
P34932	HSPA4	16844000	cytosol [GO:0005829]; extracellular exosome [GO:0070062]; mitochondrion [GO:0005739]; nucleus [GO:0005634]
P12277	CKB	16560000	cytosol [GO:0005829]; dendrite [GO:0030425]; extracellular exosome [GO:0070062]; extracellular space [GO:0005615]; mitochondrion [GO:0005739]; neuronal cell body [GO:0043025]; nucleus [GO:0005634]
P49419	ALDH7A1	16179000	cytosol [GO:0005829]; extracellular exosome [GO:0070062]; mitochondrial matrix [GO:0005759]; mitochondrion [GO:0005739]; nucleus [GO:0005634]
P06744	GPI	16070000	ciliary membrane [GO:0060170]; cytosol [GO:0005829]; extracellular exosome [GO:0070062]; extracellular region [GO:0005576]; ficolin-1-rich granule lumen [GO:1904813]; membrane [GO:0016020]; neuron projection [GO:0043005]; nucleoplasm [GO:0005654]; plasma membrane [GO:0005886]; secretory granule lumen [GO:0034774]
P51149	RAB7A	15965000	alveolar lamellar body [GO:0097208]; anchored component of synaptic vesicle membrane [GO:0098993]; autophagosome membrane [GO:0000421]; cytosol [GO:0005829]; endosome membrane [GO:0010008]; extracellular exosome [GO:0070062]; extrinsic component of lysosome membrane [GO:0032419]; Golgi apparatus [GO:0005794]; late endosome [GO:0005770]; late endosome membrane [GO:0031902]; lipid droplet [GO:00058…
O75874	IDH1	15740000	cytoplasm [GO:0005737]; cytosol [GO:0005829]; extracellular exosome [GO:0070062]; extracellular region [GO:0005576]; ficolin-1-rich granule lumen [GO:1904813]; mitochondrion [GO:0005739]; peroxisomal matrix [GO:0005782]; peroxisome [GO:0005777]; secretory granule lumen [GO:0034774]; tertiary granule lumen [GO:1904724]
Q8NBS9	TXNDC5	14792000	azurophil granule lumen [GO:0035578]; endoplasmic reticulum [GO:0005783]; endoplasmic reticulum lumen [GO:0005788]; extracellular exosome [GO:0070062]; extracellular region [GO:0005576]; lysosomal lumen [GO:0043202]
P63241	EIF5A	14015000	annulate lamellae [GO:0005642]; cytoplasm [GO:0005737]; cytosol [GO:0005829]; endoplasmic reticulum membrane [GO:0005789]; membrane [GO:0016020]; nuclear pore [GO:0005643]; nucleus [GO:0005634]
O14745	SLC9A3R1	13381000	actin cytoskeleton [GO:0015629]; apical plasma membrane [GO:0016324]; brush border membrane [GO:0031526]; cell periphery [GO:0071944]; cytoplasm [GO:0005737]; endomembrane system [GO:0012505]; extracellular exosome [GO:0070062]; filopodium [GO:0030175]; membrane [GO:0016020]; membrane raft [GO:0045121]; microvillus [GO:0005902]; microvillus membrane [GO:0031528]; perinuclear region of cytoplasm […
O00592	PODXL	13192000	apical plasma membrane [GO:0016324]; centriolar satellite [GO:0034451]; cytoplasm [GO:0005737]; extracellular exosome [GO:0070062]; extracellular space [GO:0005615]; filopodium [GO:0030175]; integral component of plasma membrane [GO:0005887]; intracellular membrane-bounded organelle [GO:0043231]; lamellipodium [GO:0030027]; membrane raft [GO:0045121]; microvillus membrane [GO:0031528]; nucleolus …
P30084	ECHS1	13169000	mitochondrial matrix [GO:0005759]; mitochondrion [GO:0005739]
P34897	SHMT2	12781000	BRISC complex [GO:0070552]; cytoplasm [GO:0005737]; cytosol [GO:0005829]; extracellular exosome [GO:0070062]; microtubule cytoskeleton [GO:0015630]; mitochondrial inner membrane [GO:0005743]; mitochondrial intermembrane space [GO:0005758]; mitochondrial matrix [GO:0005759]; mitochondrial nucleoid [GO:0042645]; mitochondrion [GO:0005739]; nucleus [GO:0005634]
P31948	STIP1	12366000	chaperone complex [GO:0101031]; cytosol [GO:0005829]; dynein axonemal particle [GO:0120293]; Golgi apparatus [GO:0005794]; nucleus [GO:0005634]; protein-containing complex [GO:0032991]
P11047	LAMC1	12246000	basement membrane [GO:0005604]; collagen-containing extracellular matrix [GO:0062023]; endoplasmic reticulum lumen [GO:0005788]; extracellular exosome [GO:0070062]; extracellular region [GO:0005576]; extracellular space [GO:0005615]; laminin-1 complex [GO:0005606]; laminin-10 complex [GO:0043259]; laminin-11 complex [GO:0043260]; protein complex involved in cell-matrix adhesion [GO:0098637]
Q9UHG3	PCYOX1	12230000	extracellular exosome [GO:0070062]; lysosome [GO:0005764]; plasma membrane [GO:0005886]; very-low-density lipoprotein particle [GO:0034361]
Q01581	HMGCS1	12186000	cytoplasm [GO:0005737]; cytosol [GO:0005829]
P40925	MDH1	12178000	centrosome [GO:0005813]; cytoplasm [GO:0005737]; cytosol [GO:0005829]; extracellular exosome [GO:0070062]; extracellular space [GO:0005615]
P50395	GDI2	11865000	azurophil granule lumen [GO:0035578]; cytoplasm [GO:0005737]; cytosol [GO:0005829]; extracellular exosome [GO:0070062]; extracellular region [GO:0005576]; focal adhesion [GO:0005925]; Golgi apparatus [GO:0005794]; membrane [GO:0016020]; secretory granule lumen [GO:0034774]; synapse [GO:0045202]; vesicle [GO:0031982]
P08758	ANXA5	11714000	collagen-containing extracellular matrix [GO:0062023]; cytoplasm [GO:0005737]; cytosol [GO:0005829]; endothelial microparticle [GO:0072563]; external side of plasma membrane [GO:0009897]; extracellular exosome [GO:0070062]; extracellular region [GO:0005576]; focal adhesion [GO:0005925]; membrane [GO:0016020]
P31939	ATIC	11532000	cytosol [GO:0005829]; extracellular exosome [GO:0070062]; membrane [GO:0016020]; plasma membrane [GO:0005886]
Q9Y624	F11R	11337000	bicellular tight junction [GO:0005923]; cell junction [GO:0030054]; cell-cell junction [GO:0005911]; extracellular exosome [GO:0070062]; integral component of membrane [GO:0016021]; plasma membrane [GO:0005886]; protein-containing complex [GO:0032991]; tight junction [GO:0070160]
P40429	RPL13A	10824000	cytoplasm [GO:0005737]; cytosol [GO:0005829]; cytosolic large ribosomal subunit [GO:0022625]; cytosolic ribosome [GO:0022626]; focal adhesion [GO:0005925]; GAIT complex [GO:0097452]; large ribosomal subunit [GO:0015934]; membrane [GO:0016020]; nucleolus [GO:0005730]; nucleus [GO:0005634]; ribonucleoprotein complex [GO:1990904]; ribosome [GO:0005840]
P60953	CDC42	10805000	apical part of cell [GO:0045177]; cell-cell junction [GO:0005911]; cytoplasm [GO:0005737]; cytoplasmic ribonucleoprotein granule [GO:0036464]; cytosol [GO:0005829]; dendritic spine [GO:0043197]; endoplasmic reticulum membrane [GO:0005789]; extracellular exosome [GO:0070062]; filopodium [GO:0030175]; focal adhesion [GO:0005925]; Golgi membrane [GO:0000139]; Golgi transport complex [GO:0017119]; le…
Q9BWD1	ACAT2	10498000	cytoplasm [GO:0005737]; cytosol [GO:0005829]; extracellular exosome [GO:0070062]; mitochondrion [GO:0005739]
P16435	POR	10436000	cytosol [GO:0005829]; endoplasmic reticulum membrane [GO:0005789]; integral component of membrane [GO:0016021]; intracellular membrane-bounded organelle [GO:0043231]; membrane [GO:0016020]; mitochondrion [GO:0005739]
Q9NSE4	IARS2	9569300	mitochondrial matrix [GO:0005759]; mitochondrion [GO:0005739]
P61586	RHOA	9489800	apical junction complex [GO:0043296]; axon [GO:0030424]; cell cortex [GO:0005938]; cell junction [GO:0030054]; cell periphery [GO:0071944]; cell projection [GO:0042995]; cleavage furrow [GO:0032154]; cytoplasmic vesicle [GO:0031410]; cytoskeleton [GO:0005856]; cytosol [GO:0005829]; dendritic spine [GO:0043197]; endoplasmic reticulum membrane [GO:0005789]; endosome [GO:0005768]; extracellular exos…
P27487	DPP4	9340900	apical plasma membrane [GO:0016324]; cell surface [GO:0009986]; endocytic vesicle [GO:0030139]; extracellular exosome [GO:0070062]; extracellular region [GO:0005576]; focal adhesion [GO:0005925]; integral component of membrane [GO:0016021]; intercellular canaliculus [GO:0046581]; lamellipodium [GO:0030027]; lamellipodium membrane [GO:0031258]; lysosomal membrane [GO:0005765]; membrane [GO:0016020…
P52209	PGD	9205200	cytosol [GO:0005829]; extracellular exosome [GO:0070062]; nucleus [GO:0005634]
P11177	PDHB	9064600	mitochondrial matrix [GO:0005759]; mitochondrial pyruvate dehydrogenase complex [GO:0005967]; mitochondrion [GO:0005739]; nucleoplasm [GO:0005654]; nucleus [GO:0005634]; pyruvate dehydrogenase complex [GO:0045254]
Q99798	ACO2	8835900	cytosol [GO:0005829]; mitochondrial matrix [GO:0005759]; mitochondrion [GO:0005739]
Q99733	NAP1L4	8833100	chromatin [GO:0000785]; cytoplasm [GO:0005737]; nucleus [GO:0005634]
P51649	ALDH5A1	7662700	mitochondrial matrix [GO:0005759]; mitochondrion [GO:0005739]
Q15181	PPA1	7334600	cytoplasm [GO:0005737]; cytosol [GO:0005829]; extracellular exosome [GO:0070062]
Q6YN16	HSDL2	6890000	membrane [GO:0016020]; mitochondrion [GO:0005739]; peroxisome [GO:0005777]
P20290	BTF3	6778200	cytoplasm [GO:0005737]; cytosol [GO:0005829]; nascent polypeptide-associated complex [GO:0005854]; nucleus [GO:0005634]; polysomal ribosome [GO:0042788]
P18206	VCL	6271800	adherens junction [GO:0005912]; brush border [GO:0005903]; cell-cell contact zone [GO:0044291]; cell-cell junction [GO:0005911]; cell-substrate junction [GO:0030055]; costamere [GO:0043034]; cytoplasm [GO:0005737]; cytoskeleton [GO:0005856]; cytosol [GO:0005829]; extracellular exosome [GO:0070062]; extracellular region [GO:0005576]; extracellular vesicle [GO:1903561]; fascia adherens [GO:0005916]…
P05556	ITGB1	6210000	cell surface [GO:0009986]; cleavage furrow [GO:0032154]; cytoplasm [GO:0005737]; dendritic spine [GO:0043197]; endosome membrane [GO:0010008]; external side of plasma membrane [GO:0009897]; extracellular exosome [GO:0070062]; filopodium [GO:0030175]; focal adhesion [GO:0005925]; glial cell projection [GO:0097386]; glutamatergic synapse [GO:0098978]; integral component of synaptic membrane [GO:009…
P23141	CES1	6168500	cytoplasm [GO:0005737]; cytosol [GO:0005829]; endoplasmic reticulum [GO:0005783]; endoplasmic reticulum lumen [GO:0005788]; lipid droplet [GO:0005811]
O00151	PDLIM1	6104600	adherens junction [GO:0005912]; cytoplasm [GO:0005737]; cytoskeleton [GO:0005856]; filamentous actin [GO:0031941]; focal adhesion [GO:0005925]; stress fiber [GO:0001725]; transcription regulator complex [GO:0005667]; Z disc [GO:0030018]
Q92896	GLG1	6007200	cytoskeleton [GO:0005856]; extracellular exosome [GO:0070062]; extracellular matrix [GO:0031012]; Golgi apparatus [GO:0005794]; Golgi membrane [GO:0000139]; integral component of membrane [GO:0016021]; membrane [GO:0016020]; plasma membrane [GO:0005886]
Q9NYU2	UGGT1	5981900	endoplasmic reticulum [GO:0005783]; endoplasmic reticulum lumen [GO:0005788]; endoplasmic reticulum quality control compartment [GO:0044322]; endoplasmic reticulum-Golgi intermediate compartment [GO:0005793]; extracellular exosome [GO:0070062]; protein-containing complex [GO:0032991]
P35606	COPB2	5940200	COPI vesicle coat [GO:0030126]; cytosol [GO:0005829]; endoplasmic reticulum membrane [GO:0005789]; Golgi membrane [GO:0000139]; transport vesicle [GO:0030133]
P20073	ANXA7	5902200	collagen-containing extracellular matrix [GO:0062023]; endoplasmic reticulum membrane [GO:0005789]; extracellular exosome [GO:0070062]; membrane [GO:0016020]; nucleus [GO:0005634]
Q9NZI8	IGF2BP1	5811700	anchoring junction [GO:0070161]; CRD-mediated mRNA stability complex [GO:0070937]; cytoplasm [GO:0005737]; cytoplasmic stress granule [GO:0010494]; cytosol [GO:0005829]; dendritic spine [GO:0043197]; filopodium [GO:0030175]; growth cone [GO:0030426]; lamellipodium [GO:0030027]; neuronal cell body [GO:0043025]; nucleoplasm [GO:0005654]; nucleus [GO:0005634]; P-body [GO:0000932]; perinuclear region…
P20645	M6PR	5641900	clathrin-coated endocytic vesicle membrane [GO:0030669]; endosome [GO:0005768]; integral component of plasma membrane [GO:0005887]; late endosome [GO:0005770]; lysosomal membrane [GO:0005765]; membrane [GO:0016020]; perinuclear region of cytoplasm [GO:0048471]; plasma membrane [GO:0005886]; trans-Golgi network [GO:0005802]; trans-Golgi network membrane [GO:0032588]; transport vesicle [GO:0030133]
Q5T2W1	PDZK1	5589000	apical plasma membrane [GO:0016324]; brush border [GO:0005903]; brush border membrane [GO:0031526]; extracellular exosome [GO:0070062]; membrane raft [GO:0045121]; microvillus membrane [GO:0031528]; plasma membrane [GO:0005886]
P23588	EIF4B	5553500	cytosol [GO:0005829]; eukaryotic translation initiation factor 4F complex [GO:0016281]
Q99536	VAT1	5459800	azurophil granule lumen [GO:0035578]; extracellular exosome [GO:0070062]; extracellular region [GO:0005576]; integral component of membrane [GO:0016021]; mitochondrial outer membrane [GO:0005741]
Q96AE4	FUBP1	5308000	cytoplasm [GO:0005737]; nucleoplasm [GO:0005654]; nucleus [GO:0005634]
P13796	LCP1	5201100	actin cytoskeleton [GO:0015629]; actin filament [GO:0005884]; actin filament bundle [GO:0032432]; cell junction [GO:0030054]; cytoplasm [GO:0005737]; cytosol [GO:0005829]; extracellular exosome [GO:0070062]; extracellular space [GO:0005615]; filopodium [GO:0030175]; focal adhesion [GO:0005925]; glial cell projection [GO:0097386]; perinuclear region of cytoplasm [GO:0048471]; phagocytic cup [GO:00…
P30040	ERP29	4984800	cell surface [GO:0009986]; endoplasmic reticulum [GO:0005783]; endoplasmic reticulum lumen [GO:0005788]; melanosome [GO:0042470]; membrane [GO:0016020]; smooth endoplasmic reticulum [GO:0005790]; transport vesicle [GO:0030133]
P08559	PDHA1	4627900	mitochondrial matrix [GO:0005759]; mitochondrial pyruvate dehydrogenase complex [GO:0005967]; mitochondrion [GO:0005739]; nucleolus [GO:0005730]; nucleus [GO:0005634]; pyruvate dehydrogenase complex [GO:0045254]
P39656	DDOST	4554900	azurophil granule membrane [GO:0035577]; endoplasmic reticulum [GO:0005783]; endoplasmic reticulum membrane [GO:0005789]; integral component of membrane [GO:0016021]; intracellular membrane-bounded organelle [GO:0043231]; membrane [GO:0016020]; oligosaccharyltransferase complex [GO:0008250]; plasma membrane [GO:0005886]
Q16555	DPYSL2	4324500	cytoskeleton [GO:0005856]; cytosol [GO:0005829]; extracellular exosome [GO:0070062]; plasma membrane [GO:0005886]
Q9HDC9	APMAP	4288500	cell surface [GO:0009986]; integral component of membrane [GO:0016021]; membrane [GO:0016020]
Q13765	NACA	4239300	cytoplasm [GO:0005737]; extracellular exosome [GO:0070062]; nascent polypeptide-associated complex [GO:0005854]; nucleus [GO:0005634]
Q99829	CPNE1	4168600	aggresome [GO:0016235]; azurophil granule membrane [GO:0035577]; cytoplasm [GO:0005737]; cytosol [GO:0005829]; extracellular exosome [GO:0070062]; membrane [GO:0016020]; nuclear membrane [GO:0031965]; nucleoplasm [GO:0005654]; nucleus [GO:0005634]; plasma membrane [GO:0005886]
P63162	SNRPN	4161500	catalytic step 2 spliceosome [GO:0071013]; cytoplasm [GO:0005737]; nucleoplasm [GO:0005654]; small nuclear ribonucleoprotein complex [GO:0030532]; spliceosomal complex [GO:0005681]; U1 snRNP [GO:0005685]; U2 snRNP [GO:0005686]; U2-type prespliceosome [GO:0071004]; U4 snRNP [GO:0005687]; U4/U6 x U5 tri-snRNP complex [GO:0046540]; U5 snRNP [GO:0005682]
Q9Y490	TLN1	3909400	adherens junction [GO:0005912]; cell surface [GO:0009986]; cytoskeleton [GO:0005856]; cytosol [GO:0005829]; extracellular exosome [GO:0070062]; extracellular region [GO:0005576]; focal adhesion [GO:0005925]; plasma membrane [GO:0005886]; ruffle [GO:0001726]; ruffle membrane [GO:0032587]
P22314	UBA1	3668600	cytoplasm [GO:0005737]; cytosol [GO:0005829]; extracellular exosome [GO:0070062]; mitochondrion [GO:0005739]; nucleoplasm [GO:0005654]; nucleus [GO:0005634]
P53396	ACLY	3303000	azurophil granule lumen [GO:0035578]; cytosol [GO:0005829]; extracellular exosome [GO:0070062]; extracellular region [GO:0005576]; ficolin-1-rich granule lumen [GO:1904813]; membrane [GO:0016020]; nucleoplasm [GO:0005654]
P49736	MCM2	3163000	chromatin [GO:0000785]; chromosome, telomeric region [GO:0000781]; CMG complex [GO:0071162]; cytoplasm [GO:0005737]; MCM complex [GO:0042555]; nuclear origin of replication recognition complex [GO:0005664]; nucleoplasm [GO:0005654]; nucleus [GO:0005634]
P37837	TALDO1	2962800	cytoplasm [GO:0005737]; cytosol [GO:0005829]; extracellular exosome [GO:0070062]; nucleus [GO:0005634]
Q15648	MED1	2914900	core mediator complex [GO:0070847]; mediator complex [GO:0016592]; membrane [GO:0016020]; nucleolus [GO:0005730]; nucleoplasm [GO:0005654]; nucleus [GO:0005634]
Q15436	SEC23A	2879400	COPII vesicle coat [GO:0030127]; cytosol [GO:0005829]; endoplasmic reticulum exit site [GO:0070971]; endoplasmic reticulum membrane [GO:0005789]; ER to Golgi transport vesicle membrane [GO:0012507]; extrinsic component of membrane [GO:0019898]; Golgi membrane [GO:0000139]; perinuclear region of cytoplasm [GO:0048471]
P50895	BCAM	2800200	collagen-containing extracellular matrix [GO:0062023]; external side of plasma membrane [GO:0009897]; extracellular exosome [GO:0070062]; extracellular region [GO:0005576]; integral component of plasma membrane [GO:0005887]; plasma membrane [GO:0005886]
P16615	ATP2A2	2775800	calcium ion-transporting ATPase complex [GO:0090534]; endoplasmic reticulum [GO:0005783]; endoplasmic reticulum membrane [GO:0005789]; integral component of membrane [GO:0016021]; integral component of plasma membrane [GO:0005887]; longitudinal sarcoplasmic reticulum [GO:0014801]; membrane [GO:0016020]; platelet dense tubular network membrane [GO:0031095]; ribbon synapse [GO:0097470]; sarcoplasmi…
P53992	SEC24C	2710800	COPII vesicle coat [GO:0030127]; cytosol [GO:0005829]; endoplasmic reticulum exit site [GO:0070971]; endoplasmic reticulum membrane [GO:0005789]; ER to Golgi transport vesicle membrane [GO:0012507]
P54578	USP14	2584000	cell surface [GO:0009986]; cytoplasmic vesicle [GO:0031410]; cytosol [GO:0005829]; extracellular exosome [GO:0070062]; plasma membrane [GO:0005886]; proteasome complex [GO:0000502]; synapse [GO:0045202]
P49588	AARS	2389500	cytoplasm [GO:0005737]; cytosol [GO:0005829]; extracellular exosome [GO:0070062]; membrane [GO:0016020]; mitochondrion [GO:0005739]
Q13200	PSMD2	2360500	cytosol [GO:0005829]; extracellular exosome [GO:0070062]; extracellular region [GO:0005576]; ficolin-1-rich granule lumen [GO:1904813]; membrane [GO:0016020]; nucleoplasm [GO:0005654]; nucleus [GO:0005634]; proteasome accessory complex [GO:0022624]; proteasome complex [GO:0000502]; proteasome regulatory particle [GO:0005838]; proteasome regulatory particle, base subcomplex [GO:0008540]; proteasom…
Q14677	CLINT1	2224500	clathrin vesicle coat [GO:0030125]; cytosol [GO:0005829]; endosome [GO:0005768]; Golgi apparatus [GO:0005794]; intracellular membrane-bounded organelle [GO:0043231]; membrane [GO:0016020]; nucleoplasm [GO:0005654]; perinuclear region of cytoplasm [GO:0048471]; plasma membrane [GO:0005886]
P31930	UQCRC1	2200300	mitochondrial inner membrane [GO:0005743]; mitochondrial respirasome [GO:0005746]; mitochondrial respiratory chain complex III [GO:0005750]; mitochondrion [GO:0005739]
O75439	PMPCB	1822500	mitochondrial inner membrane [GO:0005743]; mitochondrial processing peptidase complex [GO:0017087]; mitochondrion [GO:0005739]
Q14978	NOLC1	1494700	box C/D RNP complex [GO:0031428]; box H/ACA snoRNP complex [GO:0031429]; Cajal body [GO:0015030]; cytoplasm [GO:0005737]; fibrillar center [GO:0001650]; nucleolus [GO:0005730]; nucleoplasm [GO:0005654]
