# Supplementary material for: Spike S1 domain interactome in non-pulmonary systems: A role beyond the receptor recognition
Source: Front Mol Biosci. 2022 Sep 26;9:975570. doi: 10.3389/fmolb.2022.975570 (PMC9550266; doi:10.3389/fmolb.2022.975570)
Supplement: Supplementary file 2 [file Table3.XLSX]

## Sheet: ClueGO Results
Supplementary Table 3. ClueGO output based on the Biological processes ontology.
ID	Term	Ontology Source	Term PValue	Term PValue Corrected with Bonferroni	Group PValue	Group PValue Corrected with Bonferroni	GOLevels	GOGroups	% Associated Genes	Nr. Genes	Cluster	Genes Cluster #1 (Caco-2)	Genes Cluster #2 (HK-2)	Genes Cluster #3 (NCM460D)	%Genes Cluster #1	%Genes Cluster #2	%Genes Cluster #3	%Genes Cluster #1.adjusted.to.input.list.size	%Genes Cluster #2.adjusted.to.input.list.size	%Genes Cluster #3.adjusted.to.input.list.size	Associated Genes Found
GO:0035722	interleukin-12-mediated signaling pathway	GO_BiologicalProcess-EBI-UniProt-GOA-ACAP-ARAP_01.06.2021_00h00	2.17122e-06	0.000165013	2.17122e-06	2.17122e-05	[5, 6, 7]	Group00	10.7143	6	None Specific Cluster	[CDC42, LCP1, SOD1]	[MSN, RAP1B]	[S100A8]	50	33.3333	16.6667	49.967	33.5757	16.4574	[CDC42, LCP1, MSN, RAP1B, S100A8, SOD1]
GO:0070527	platelet aggregation	GO_BiologicalProcess-EBI-UniProt-GOA-ACAP-ARAP_01.06.2021_00h00	7.45856e-06	0.000566851	7.45856e-06	7.45856e-05	[4, 5, 7]	Group01	8.69565	6	None Specific Cluster	[CLIC1, F11R, TLN1, VCL]	[BSG, ITGB3, VCL]	[CLIC1]	50	37.5	12.5	49.9257	37.7415	12.3328	[BSG, CLIC1, F11R, ITGB3, TLN1, VCL]
GO:0072659	protein localization to plasma membrane	GO_BiologicalProcess-EBI-UniProt-GOA-ACAP-ARAP_01.06.2021_00h00	5.77353e-06	0.000438788	5.77353e-06	5.77353e-05	[5, 6]	Group02	3.71622	11	None Specific Cluster	[F11R, ITGB1, PDZK1, RAB7A, SEC23A, SLC9A3R1]	[BSG, ITGB1, RAB7A]	[LGALS3, NSF, RAB10, RAB11A, RAB7A]	42.8571	21.4286	35.7143	42.9668	21.6539	35.3794	[BSG, F11R, ITGB1, LGALS3, NSF, PDZK1, RAB10, RAB11A, RAB7A, SEC23A, SLC9A3R1]
GO:0006090	pyruvate metabolic process	GO_BiologicalProcess-EBI-UniProt-GOA-ACAP-ARAP_01.06.2021_00h00	3.77137e-06	0.000286624	3.77137e-06	3.77137e-05	[7]	Group03	5.02793	9	None Specific Cluster	[GPI, LDHB, PODXL]	[BSG, HKDC1, LDHB]	[DLAT, GPI, LDHB, NUP155, NUP93, OGDH]	25	25	50	25.0996	25.2988	49.6016	[BSG, DLAT, GPI, HKDC1, LDHB, NUP155, NUP93, OGDH, PODXL]
GO:0006900	vesicle budding from membrane	GO_BiologicalProcess-EBI-UniProt-GOA-ACAP-ARAP_01.06.2021_00h00	1.26637e-06	9.62443e-05	1.26637e-06	1.26637e-05	[3, 5, 6]	Group04	6.89655	8	None Specific Cluster	[RAB1A, RAB7A, SEC23A, SEC24C]	[LMAN1, RAB7A, SEC22B]	[NSF, RAB1B, RAB7A]	40	30	30	40.0477	30.2741	29.6782	[LMAN1, NSF, RAB1A, RAB1B, RAB7A, SEC22B, SEC23A, SEC24C]
GO:0048208	COPII vesicle coating	GO_BiologicalProcess-EBI-UniProt-GOA-ACAP-ARAP_01.06.2021_00h00	4.35522e-07	3.30997e-05	1.26637e-06	1.26637e-05	[5, 6, 7, 8, 9]	Group04	10.1449	7	None Specific Cluster	[RAB1A, SEC23A, SEC24C]	[LMAN1, SEC22B]	[NSF, RAB1B]	42.8571	28.5714	28.5714	42.9058	28.8309	28.2633	[LMAN1, NSF, RAB1A, RAB1B, SEC22B, SEC23A, SEC24C]
GO:0002064	epithelial cell development	GO_BiologicalProcess-EBI-UniProt-GOA-ACAP-ARAP_01.06.2021_00h00	5.75424e-06	0.000437322	5.75424e-06	5.75424e-05	[4, 5, 6]	Group05	4.16667	10	None Specific Cluster	[F11R, LAMC1, PODXL, RAB1A, SLC9A3R1, SOD1, VCL]	[LAMC1, MSN, RAP1B, VCL]	[RAB1B]	58.3333	33.3333	8.33333	58.237	33.5424	8.22053	[F11R, LAMC1, MSN, PODXL, RAB1A, RAB1B, RAP1B, SLC9A3R1, SOD1, VCL]
GO:0061028	establishment of endothelial barrier	GO_BiologicalProcess-EBI-UniProt-GOA-ACAP-ARAP_01.06.2021_00h00	2.41323e-06	0.000183405	5.75424e-06	5.75424e-05	[6, 7, 8]	Group05	10.5263	6	None Specific Cluster	[F11R, RAB1A, VCL]	[MSN, RAP1B, VCL]	[RAB1B]	42.8571	42.8571	14.2857	42.7844	43.1239	14.0917	[F11R, MSN, RAB1A, RAB1B, RAP1B, VCL]
GO:0052126	movement in host environment	GO_BiologicalProcess-EBI-UniProt-GOA-ACAP-ARAP_01.06.2021_00h00	1.28479e-07	9.76438e-06	4.28316e-08	4.28316e-07	[4]	Group06	5.47264	11	None Specific Cluster	[DPP4, F11R, ITGB1, PODXL, RAB7A]	[BSG, CAV1, ITGB1, ITGB3, RAB7A]	[ITGA2, LAMP1, RAB7A, SLC1A5]	35.7143	35.7143	28.5714	35.7345	36.0182	28.2473	[BSG, CAV1, DPP4, F11R, ITGA2, ITGB1, ITGB3, LAMP1, PODXL, RAB7A, SLC1A5]
GO:0046718	viral entry into host cell	GO_BiologicalProcess-EBI-UniProt-GOA-ACAP-ARAP_01.06.2021_00h00	1.27529e-06	9.69219e-05	4.28316e-08	4.28316e-07	[3, 6]	Group06	5.73248	9	None Specific Cluster	[DPP4, F11R, ITGB1]	[BSG, CAV1, ITGB1, ITGB3]	[ITGA2, LAMP1, SLC1A5]	30	40	30	30.0119	40.3335	29.6546	[BSG, CAV1, DPP4, F11R, ITGA2, ITGB1, ITGB3, LAMP1, SLC1A5]
GO:0030198	extracellular matrix organization	GO_BiologicalProcess-EBI-UniProt-GOA-ACAP-ARAP_01.06.2021_00h00	3.76138e-07	2.85865e-05	4.28316e-08	4.28316e-07	[5]	Group06	3.36323	15	None Specific Cluster	[DPP4, F11R, ITGB1, LAMC1, LCP1]	[BSG, CAV1, CD44, FSCN1, ITGB1, ITGB3, LAMC1, P4HA1, PLOD2]	[COLGALT1, ERO1A, ITGA2]	29.4118	52.9412	17.6471	29.3501	53.2495	17.4004	[BSG, CAV1, CD44, COLGALT1, DPP4, ERO1A, F11R, FSCN1, ITGA2, ITGB1, ITGB3, LAMC1, LCP1, P4HA1, PLOD2]
GO:0030010	establishment of cell polarity	GO_BiologicalProcess-EBI-UniProt-GOA-ACAP-ARAP_01.06.2021_00h00	9.52714e-06	0.000724063	1.65568e-06	1.65568e-05	[3]	Group07	5.26316	8	None Specific Cluster	[CDC42, ITGB1, RHOA, SLC9A3R1]	[FSCN1, ITGB1, MSN, RAP1B, RHOA]	[RAB10, RHOA]	36.3636	45.4545	18.1818	36.3112	45.7493	17.9395	[CDC42, FSCN1, ITGB1, MSN, RAB10, RAP1B, RHOA, SLC9A3R1]
GO:0035089	establishment of apical/basal cell polarity	GO_BiologicalProcess-EBI-UniProt-GOA-ACAP-ARAP_01.06.2021_00h00	6.43606e-07	4.8914e-05	1.65568e-06	1.65568e-05	[5]	Group07	20	5	None Specific Cluster	[CDC42, RHOA, SLC9A3R1]	[FSCN1, MSN, RHOA]	[RHOA]	42.8571	42.8571	14.2857	42.7844	43.1239	14.0917	[CDC42, FSCN1, MSN, RHOA, SLC9A3R1]
GO:0071803	positive regulation of podosome assembly	GO_BiologicalProcess-EBI-UniProt-GOA-ACAP-ARAP_01.06.2021_00h00	1.9462e-06	0.000147911	1.65568e-06	1.65568e-05	[5, 6, 7, 8]	Group07	28.5714	4	None Specific Cluster	[LCP1, RHOA]	[FSCN1, MSN, RHOA]	[RHOA]	33.3333	50	16.6667	33.2673	50.297	16.4356	[FSCN1, LCP1, MSN, RHOA]
GO:0006091	generation of precursor metabolites and energy	GO_BiologicalProcess-EBI-UniProt-GOA-ACAP-ARAP_01.06.2021_00h00	1.57451e-08	1.19663e-06	1.57451e-08	1.57451e-07	[3]	Group08	3.24786	19	None Specific Cluster	[GPI, POR, RHOA, SHMT2, UQCRC1]	[ATP5F1C, ATP5PD, CHCHD2, COX4I1, COX5A, COX6B1, HKDC1, RHOA, SHMT2, STOML2, UQCRC1]	[ACADM, DLAT, DLST, GPI, NUP155, NUP93, OGDH, POR, RHOA, SHMT2, STOML2, UQCRC1]	17.8571	39.2857	42.8571	17.8926	39.6762	42.4311	[ACADM, ATP5F1C, ATP5PD, CHCHD2, COX4I1, COX5A, COX6B1, DLAT, DLST, GPI, HKDC1, NUP155, NUP93, OGDH, POR, RHOA, SHMT2, STOML2, UQCRC1]
GO:0015980	energy derivation by oxidation of organic compounds	GO_BiologicalProcess-EBI-UniProt-GOA-ACAP-ARAP_01.06.2021_00h00	1.168e-07	8.87681e-06	1.57451e-08	1.57451e-07	[4]	Group08	4	14	None Specific Cluster	[RHOA, SHMT2, UQCRC1]	[ATP5F1C, ATP5PD, CHCHD2, COX4I1, COX5A, COX6B1, RHOA, SHMT2, STOML2, UQCRC1]	[ACADM, DLAT, DLST, OGDH, RHOA, SHMT2, STOML2, UQCRC1]	14.2857	47.619	38.0952	14.2965	48.0333	37.6702	[ACADM, ATP5F1C, ATP5PD, CHCHD2, COX4I1, COX5A, COX6B1, DLAT, DLST, OGDH, RHOA, SHMT2, STOML2, UQCRC1]
GO:0006119	oxidative phosphorylation	GO_BiologicalProcess-EBI-UniProt-GOA-ACAP-ARAP_01.06.2021_00h00	9.3856e-08	7.13306e-06	1.57451e-08	1.57451e-07	[3, 7]	Group08	6.53595	10	None Specific Cluster	[RHOA, SHMT2, UQCRC1]	[ATP5F1C, ATP5PD, CHCHD2, COX4I1, COX5A, COX6B1, RHOA, SHMT2, STOML2, UQCRC1]	[RHOA, SHMT2, STOML2, UQCRC1]	17.6471	58.8235	23.5294	17.6142	59.1799	23.206	[ATP5F1C, ATP5PD, CHCHD2, COX4I1, COX5A, COX6B1, RHOA, SHMT2, STOML2, UQCRC1]
GO:0009060	aerobic respiration	GO_BiologicalProcess-EBI-UniProt-GOA-ACAP-ARAP_01.06.2021_00h00	1.64343e-09	1.249e-07	1.57451e-08	1.57451e-07	[6]	Group08	6.28019	13	None Specific Cluster	[RHOA, SHMT2, UQCRC1]	[ATP5F1C, ATP5PD, CHCHD2, COX4I1, COX5A, COX6B1, RHOA, SHMT2, STOML2, UQCRC1]	[DLAT, DLST, OGDH, RHOA, SHMT2, STOML2, UQCRC1]	15	50	35	15.003	50.4068	34.5902	[ATP5F1C, ATP5PD, CHCHD2, COX4I1, COX5A, COX6B1, DLAT, DLST, OGDH, RHOA, SHMT2, STOML2, UQCRC1]
GO:0002366	leukocyte activation involved in immune response	GO_BiologicalProcess-EBI-UniProt-GOA-ACAP-ARAP_01.06.2021_00h00	6.31246e-14	4.79747e-12	2.14393e-15	2.14393e-14	[3, 4]	Group09	3.66162	29	None Specific Cluster	[ACLY, ANXA3, CPNE1, DDOST, GDI2, GPI, LCP1, PSMD2, RAB7A, RHOA, VAT1, VCL]	[CD44, CLU, CYB5R3, DDOST, PGRMC1, RAB5C, RAB7A, RAP1B, RHOA, VCL]	[CEACAM6, ERP44, GPI, LAMP1, LGALS3, LTF, MLEC, PGRMC1, PRDX5, PSAP, RAB10, RAB18, RAB5C, RAB7A, RHOA, S100A8, VAT1]	30.7692	25.641	43.5897	30.8666	25.9263	43.2071	[ACLY, ANXA3, CD44, CEACAM6, CLU, CPNE1, CYB5R3, DDOST, ERP44, GDI2, GPI, LAMP1, LCP1, LGALS3, LTF, MLEC, PGRMC1, PRDX5, PSAP, PSMD2, RAB10, RAB18, RAB5C, RAB7A, RAP1B, RHOA, S100A8, VAT1, VCL]
GO:0002444	myeloid leukocyte mediated immunity	GO_BiologicalProcess-EBI-UniProt-GOA-ACAP-ARAP_01.06.2021_00h00	1.25417e-16	9.53166e-15	2.14393e-15	2.14393e-14	[4]	Group09	4.6549	29	None Specific Cluster	[ACLY, ANXA3, CPNE1, DDOST, GDI2, GPI, PSMD2, RAB7A, RHOA, VAT1, VCL]	[CD44, CLU, CYB5R3, DDOST, MAVS, PGRMC1, RAB5C, RAB7A, RAP1B, RHOA, VCL]	[CEACAM6, ERP44, GPI, LAMP1, LGALS3, LTF, MLEC, PGRMC1, PRDX5, PSAP, RAB10, RAB18, RAB5C, RAB7A, RHOA, S100A8, VAT1]	28.2051	28.2051	43.5897	28.2886	28.5131	43.1983	[ACLY, ANXA3, CD44, CEACAM6, CLU, CPNE1, CYB5R3, DDOST, ERP44, GDI2, GPI, LAMP1, LGALS3, LTF, MAVS, MLEC, PGRMC1, PRDX5, PSAP, PSMD2, RAB10, RAB18, RAB5C, RAB7A, RAP1B, RHOA, S100A8, VAT1, VCL]
GO:0006887	exocytosis	GO_BiologicalProcess-EBI-UniProt-GOA-ACAP-ARAP_01.06.2021_00h00	1.99185e-16	1.51381e-14	2.14393e-15	2.14393e-14	[3, 4, 5, 6]	Group09	3.56053	35	None Specific Cluster	[ACLY, ANXA3, ANXA5, ATP2A2, CPNE1, DDOST, GDI2, GPI, PSMD2, RAB7A, RHOA, SOD1, TLN1, VAT1, VCL]	[CD44, CLU, CYB5R3, DDOST, ITGB3, PGRMC1, RAB5C, RAB7A, RAP1B, RHOA, VCL]	[ATP2A2, CEACAM6, ERP44, GPI, LAMP1, LGALS3, LTF, MLEC, NSF, PGRMC1, PRDX5, PSAP, RAB10, RAB11A, RAB18, RAB5C, RAB7A, RHOA, S100A8, VAT1]	32.6087	23.913	43.4783	32.7159	24.1821	43.102	[ACLY, ANXA3, ANXA5, ATP2A2, CD44, CEACAM6, CLU, CPNE1, CYB5R3, DDOST, ERP44, GDI2, GPI, ITGB3, LAMP1, LGALS3, LTF, MLEC, NSF, PGRMC1, PRDX5, PSAP, PSMD2, RAB10, RAB11A, RAB18, RAB5C, RAB7A, RAP1B, RHOA, S100A8, SOD1, TLN1, VAT1, VCL]
GO:0045055	regulated exocytosis	GO_BiologicalProcess-EBI-UniProt-GOA-ACAP-ARAP_01.06.2021_00h00	2.54968e-16	1.93776e-14	2.14393e-15	2.14393e-14	[4, 5, 6, 7]	Group09	3.80623	33	None Specific Cluster	[ACLY, ANXA3, ANXA5, ATP2A2, CPNE1, DDOST, GDI2, GPI, PSMD2, RAB7A, RHOA, SOD1, TLN1, VAT1, VCL]	[CD44, CLU, CYB5R3, DDOST, ITGB3, PGRMC1, RAB5C, RAB7A, RAP1B, RHOA, VCL]	[ATP2A2, CEACAM6, ERP44, GPI, LAMP1, LGALS3, LTF, MLEC, PGRMC1, PRDX5, PSAP, RAB10, RAB18, RAB5C, RAB7A, RHOA, S100A8, VAT1]	34.0909	25	40.9091	34.1896	25.2713	40.5391	[ACLY, ANXA3, ANXA5, ATP2A2, CD44, CEACAM6, CLU, CPNE1, CYB5R3, DDOST, ERP44, GDI2, GPI, ITGB3, LAMP1, LGALS3, LTF, MLEC, PGRMC1, PRDX5, PSAP, PSMD2, RAB10, RAB18, RAB5C, RAB7A, RAP1B, RHOA, S100A8, SOD1, TLN1, VAT1, VCL]
GO:0043312	neutrophil degranulation	GO_BiologicalProcess-EBI-UniProt-GOA-ACAP-ARAP_01.06.2021_00h00	2.73801e-17	2.08089e-15	2.14393e-15	2.14393e-14	[4, 5, 6, 7, 8, 9]	Group09	5.19481	28	None Specific Cluster	[ACLY, ANXA3, CPNE1, DDOST, GDI2, GPI, PSMD2, RAB7A, RHOA, VAT1, VCL]	[CD44, CLU, CYB5R3, DDOST, PGRMC1, RAB5C, RAB7A, RAP1B, RHOA, VCL]	[CEACAM6, ERP44, GPI, LAMP1, LGALS3, LTF, MLEC, PGRMC1, PRDX5, PSAP, RAB10, RAB18, RAB5C, RAB7A, RHOA, S100A8, VAT1]	28.9474	26.3158	44.7368	29.0414	26.6108	44.3478	[ACLY, ANXA3, CD44, CEACAM6, CLU, CPNE1, CYB5R3, DDOST, ERP44, GDI2, GPI, LAMP1, LGALS3, LTF, MLEC, PGRMC1, PRDX5, PSAP, PSMD2, RAB10, RAB18, RAB5C, RAB7A, RAP1B, RHOA, S100A8, VAT1, VCL]
