# Supplementary material for: Spike S1 domain interactome in non-pulmonary systems: A role beyond the receptor recognition
Source: Front Mol Biosci. 2022 Sep 26;9:975570. doi: 10.3389/fmolb.2022.975570 (PMC9550266; doi:10.3389/fmolb.2022.975570)
Supplement: Supplementary file 4 [file Table4.XLSX]

## Sheet: ClueGO Results
Supplementary Table 4. ClueGO output based on the Reactome pathways database.
ID	Term	Ontology Source	Term PValue	Term PValue Corrected with Bonferroni	Group PValue	Group PValue Corrected with Bonferroni	GOLevels	GOGroups	% Associated Genes	Nr. Genes	Cluster	Genes Cluster #1 (Caco-2)	Genes Cluster #2 (HK-2)	Genes Cluster #3 (NCM460D)	%Genes Cluster #1	%Genes Cluster #2	%Genes Cluster #3	%Genes Cluster #1.adjusted.to.input.list.size	%Genes Cluster #2.adjusted.to.input.list.size	%Genes Cluster #3.adjusted.to.input.list.size	Associated Genes Found
R-HSA:1428517	The citric acid (TCA) cycle and respiratory electron transport	REACTOME_Pathways_13.05.2021	1.3397e-06	7.77028e-05	1.3397e-06	9.37792e-06	[-1]	Group0	6.17978	11	None Specific Cluster	[LDHB, UQCRC1]	[ATP5F1C, ATP5PD, BSG, COX4I1, COX5A, COX6B1, LDHB, UQCRC1]	[DLAT, DLST, LDHB, OGDH, UQCRC1]	13.3333	53.3333	33.3333	13.3298	53.7424	32.9278	[ATP5F1C, ATP5PD, BSG, COX4I1, COX5A, COX6B1, DLAT, DLST, LDHB, OGDH, UQCRC1]
R-HSA:202733	Cell surface interactions at the vascular wall	REACTOME_Pathways_13.05.2021	5.98397e-05	0.0034707	5.98397e-05	0.000418878	[-1]	Group1	5.83942	8	None Specific Cluster	[F11R, GLG1, ITGB1]	[BSG, CAV1, CD44, ITGB1, ITGB3]	[CEACAM6]	33.3333	55.5556	11.1111	33.2308	55.8242	10.9451	[BSG, CAV1, CD44, CEACAM6, F11R, GLG1, ITGB1, ITGB3]
R-HSA:6798695	Neutrophil degranulation	REACTOME_Pathways_13.05.2021	4.24016e-12	2.45929e-10	4.24016e-12	2.96811e-11	[-1]	Group2	5.20833	25	None Specific Cluster	[ACLY, CPNE1, DDOST, GDI2, GPI, PSMD2, RAB7A, RHOA, VAT1, VCL]	[CD44, CYB5R3, DDOST, PGRMC1, RAB5C, RAB7A, RAP1B, RHOA, VCL]	[CEACAM6, ERP44, GPI, LAMP1, LGALS3, LTF, MLEC, PGRMC1, PSAP, RAB10, RAB18, RAB5C, RAB7A, RHOA, S100A8, VAT1]	28.5714	25.7143	45.7143	28.6689	26.0068	45.3242	[ACLY, CD44, CEACAM6, CPNE1, CYB5R3, DDOST, ERP44, GDI2, GPI, LAMP1, LGALS3, LTF, MLEC, PGRMC1, PSAP, PSMD2, RAB10, RAB18, RAB5C, RAB7A, RAP1B, RHOA, S100A8, VAT1, VCL]
R-HSA:8950505	Gene and protein expression by JAK-STAT signaling after Interleukin-12 stimulation	REACTOME_Pathways_13.05.2021	3.28254e-05	0.00190387	9.34974e-05	0.000654482	[-1]	Group3	13.1579	5	None Specific Cluster	[CDC42, LCP1, SOD1]	[MSN, RAP1B]	[]	60	40	0	59.8101	40.1899	0	[CDC42, LCP1, MSN, RAP1B, SOD1]
R-HSA:9020591	Interleukin-12 signaling	REACTOME_Pathways_13.05.2021	9.34974e-05	0.00542285	9.34974e-05	0.000654482	[-1]	Group3	10.6383	5	None Specific Cluster	[CDC42, LCP1, SOD1]	[MSN, RAP1B]	[]	60	40	0	59.8101	40.1899	0	[CDC42, LCP1, MSN, RAP1B, SOD1]
R-HSA:199977	ER to Golgi Anterograde Transport	REACTOME_Pathways_13.05.2021	0.000136038	0.00789021	0.000136038	0.000952267	[-1]	Group4	5.19481	8	None Specific Cluster	[COPB2, RAB1A, SEC23A, SEC24C]	[LMAN1, SEC22B]	[NSF, RAB1B]	50	25	25	50.0496	25.2234	24.7269	[COPB2, LMAN1, NSF, RAB1A, RAB1B, SEC22B, SEC23A, SEC24C]
R-HSA:204005	COPII-mediated vesicle transport	REACTOME_Pathways_13.05.2021	4.38944e-06	0.000254587	0.000136038	0.000952267	[-1]	Group4	10.2941	7	None Specific Cluster	[RAB1A, SEC23A, SEC24C]	[LMAN1, SEC22B]	[NSF, RAB1B]	42.8571	28.5714	28.5714	42.9058	28.8309	28.2633	[LMAN1, NSF, RAB1A, RAB1B, SEC22B, SEC23A, SEC24C]
R-HSA:8873719	RAB geranylgeranylation	REACTOME_Pathways_13.05.2021	3.22948e-06	0.00018731	0.000136038	0.000952267	[-1]	Group5	10.7692	7	None Specific Cluster	[RAB1A, RAB7A]	[RAB5C, RAB7A]	[RAB10, RAB11A, RAB18, RAB1B, RAB5C, RAB7A]	20	20	60	20.1117	20.2713	59.6169	[RAB10, RAB11A, RAB18, RAB1A, RAB1B, RAB5C, RAB7A]
R-HSA:8876198	RAB GEFs exchange GTP for GDP on RABs	REACTOME_Pathways_13.05.2021	2.8328e-05	0.00164303	0.000136038	0.000952267	[-1]	Group5	7.77778	7	None Specific Cluster	[GDI2, RAB1A, RAB7A]	[RAB5C, RAB7A]	[RAB10, RAB18, RAB1B, RAB5C, RAB7A]	30	20	50	30.1315	20.2471	49.6214	[GDI2, RAB10, RAB18, RAB1A, RAB1B, RAB5C, RAB7A]
R-HSA:9007101	Rab regulation of trafficking	REACTOME_Pathways_13.05.2021	2.92913e-05	0.0016989	0.000136038	0.000952267	[-1]	Group5	6.45161	8	None Specific Cluster	[GDI2, RAB1A, RAB7A]	[RAB5C, RAB7A]	[RAB10, RAB11A, RAB18, RAB1B, RAB5C, RAB7A]	27.2727	18.1818	54.5455	27.4112	18.4191	54.1697	[GDI2, RAB10, RAB11A, RAB18, RAB1A, RAB1B, RAB5C, RAB7A]
R-HSA:9013404	RAC2 GTPase cycle	REACTOME_Pathways_13.05.2021	2.44612e-05	0.00141875	7.99425e-07	5.59597e-06	[-1]	Group6	7.95455	7	Specific for Cluster #2	[CDC42, ITGB1, RAB7A]	[CAV1, EMD, ITGB1, LMAN1, RAB7A, SAMM50]	[RAB7A]	30	60	10	29.8932	60.261	9.84579	[CAV1, CDC42, EMD, ITGB1, LMAN1, RAB7A, SAMM50]
R-HSA:9013408	RHOG GTPase cycle	REACTOME_Pathways_13.05.2021	6.01996e-07	3.49158e-05	7.99425e-07	5.59597e-06	[-1]	Group6	10.8108	8	None Specific Cluster	[CDC42, ITGB1, RAB7A, SHMT2]	[CAV1, EMD, ITGB1, KTN1, LMAN1, RAB7A, SHMT2]	[RAB7A, SHMT2]	30.7692	53.8462	15.3846	30.6943	54.1413	15.1644	[CAV1, CDC42, EMD, ITGB1, KTN1, LMAN1, RAB7A, SHMT2]
R-HSA:9013423	RAC3 GTPase cycle	REACTOME_Pathways_13.05.2021	3.75785e-05	0.00217955	7.99425e-07	5.59597e-06	[-1]	Group6	7.44681	7	None Specific Cluster	[CDC42, ITGB1, RAB7A]	[CAV1, EMD, ITGB1, LMAN1, RAB7A]	[RAB7A, SLC1A5]	30	50	20	29.9525	50.317	19.7306	[CAV1, CDC42, EMD, ITGB1, LMAN1, RAB7A, SLC1A5]
R-HSA:114608	Platelet degranulation	REACTOME_Pathways_13.05.2021	3.89418e-05	0.00225862	1.02206e-05	7.15444e-05	[-1]	Group7	6.20155	8	None Specific Cluster	[ANXA5, SOD1, TLN1, VCL]	[CALU, CLU, ITGB3, VCL]	[CALU, PSAP]	40	40	20	39.9683	40.2855	19.7462	[ANXA5, CALU, CLU, ITGB3, PSAP, SOD1, TLN1, VCL]
R-HSA:76002	Platelet activation, signaling and aggregation	REACTOME_Pathways_13.05.2021	1.02206e-05	0.000592796	1.02206e-05	7.15444e-05	[-1]	Group7	4.56274	12	None Specific Cluster	[ANXA5, CDC42, RHOA, SOD1, TLN1, VCL]	[CALU, CLU, GNG12, ITGB3, RAP1B, RHOA, VCL]	[CALU, PSAP, RHOA]	37.5	43.75	18.75	37.4536	44.0426	18.5038	[ANXA5, CALU, CDC42, CLU, GNG12, ITGB3, PSAP, RAP1B, RHOA, SOD1, TLN1, VCL]
R-HSA:76005	Response to elevated platelet cytosolic Ca2+	REACTOME_Pathways_13.05.2021	5.11177e-05	0.00296482	1.02206e-05	7.15444e-05	[-1]	Group7	5.97015	8	None Specific Cluster	[ANXA5, SOD1, TLN1, VCL]	[CALU, CLU, ITGB3, VCL]	[CALU, PSAP]	40	40	20	39.9683	40.2855	19.7462	[ANXA5, CALU, CLU, ITGB3, PSAP, SOD1, TLN1, VCL]
