# Supplementary material for: Spike S1 domain interactome in non-pulmonary systems: A role beyond the receptor recognition
Source: Front Mol Biosci. 2022 Sep 26;9:975570. doi: 10.3389/fmolb.2022.975570 (PMC9550266; doi:10.3389/fmolb.2022.975570)
Supplement: Supplementary file 5 [file Table1.XLSX]

## Sheet: Legend
		Supplementary Table 1. Detail of protein identification by mass spectrometry. The raw protein groups by MaxQuant are reported for all the pulldown and pre-clearing samples.

## Sheet: proteinGroups_Caco-2 sample
Protein Ids	Majority protein IDs	Peptide counts (all)	Peptide counts (razor+unique)	Peptide counts (unique)	Fasta headers	Number of proteins	Peptides	Razor + unique peptides	Unique peptides	Peptides PULLDOWN_CACO2_S1PULLDOWN_02AUG21.raw	Razor + unique peptides PULLDOWN_CACO2_S1PULLDOWN_02AUG21.raw	Unique peptides PULLDOWN_CACO2_S1PULLDOWN_02AUG21.raw	Sequence coverage [%]	Unique + razor sequence coverage [%]	Unique sequence coverage [%]	Mol. weight [kDa]	Sequence length	Sequence lengths	Q-value	Score	Sequence coverage PULLDOWN_CACO2_S1PULLDOWN_02AUG21.raw [%]	Intensity	Intensity PULLDOWN_CACO2_S1PULLDOWN_02AUG21.raw	MS/MS Count	Only identified by site	Reverse	Potential contaminant	id	Peptide IDs	Peptide is razor	Mod. peptide IDs	Evidence IDs	MS/MS IDs	Best MS/MS	Oxidation (M) site IDs	Oxidation (M) site positions
CON__P00761	CON__P00761	8	8	8	>P00761 SWISS-PROT:P00761|TRYP_PIG Trypsin - Sus scrofa (Pig).	1	8	8	8	8	8	8	43.3	43.3	43.3	24.409	231	231	0	166.7	43.3	21429000000	21429000000	496			+	0	170;976;1255;1398;1399;1797;1911;2162	True;True;True;True;True;True;True;True	175;1006;1007;1297;1444;1445;1868;1986;2246	200;1127;1128;1129;1130;1445;1446;1609;1610;1611;1612;1613;1614;1615;1616;1617;1618;1619;1620;1621;1622;1623;1624;1625;1626;1627;1628;1629;1630;1631;1632;1633;1634;1635;1636;1637;1638;1639;1640;1641;1642;1643;1644;1645;1646;1647;1648;1649;1650;1651;1652;1653;1654;1655;1656;1657;1658;1659;1660;1661;1662;1663;2138;2270;2563;2564;2565;2566;2567;2568;2569;2570;2571;2572;2573;2574;2575;2576;2577;2578;…	333;1766;1767;1768;1769;1770;1771;1772;1773;1774;1775;1776;2234;2235;2236;2480;2481;2482;2483;2484;2485;2486;2487;2488;2489;2490;2491;2492;2493;2494;2495;2496;2497;2498;2499;2500;2501;2502;2503;2504;2505;2506;2507;2508;2509;2510;2511;2512;2513;2514;2515;2516;2517;2518;2519;2520;2521;2522;2523;2524;2525;2526;2527;2528;2529;2530;2531;2532;2533;2534;2535;2536;2537;2538;2539;2540;2541;2542;2543;2544;…	333;1771;2235;2585;2615;3353;3576;4314	0	94
CON__P02769;CON__P02768-1	CON__P02769	48;4	48;4	44;0	>P02769 SWISS-PROT:P02769 (Bos taurus) Bovine serum albumin precursor	2	48	48	44	48	48	44	69	69	65.4	69.293	607	607;609	0	323.31	69	553940000	553940000	88			+	1	51;64;209;246;247;248;291;314;315;352;401;421;422;514;533;534;581;623;739;852;853;860;862;1153;1174;1197;1248;1259;1441;1502;1541;1670;1671;1710;1724;1756;1757;1768;1837;1838;1864;1974;2160;2236;2237;2317;2434;2447	True;True;True;True;True;True;True;True;True;True;True;True;True;True;True;True;True;True;True;True;True;True;True;True;True;True;True;True;True;True;True;True;True;True;True;True;True;True;True;True;True;True;True;True;True;True;True;True	51;64;214;253;254;255;299;323;324;362;415;435;436;531;532;552;553;601;645;765;879;880;887;889;1191;1212;1235;1290;1301;1487;1554;1596;1734;1735;1736;1777;1792;1825;1826;1838;1912;1913;1939;2049;2244;2322;2323;2406;2524;2537	59;73;244;286;287;288;333;358;359;360;405;406;468;490;491;596;597;619;620;672;727;867;990;991;992;993;1000;1002;1329;1350;1351;1374;1436;1437;1450;1708;1777;1825;1991;1992;1993;1994;1995;2040;2059;2094;2095;2107;2187;2188;2189;2220;2342;2343;2561;2835;2836;2837;2933;3066;3080	93;125;410;411;412;474;475;476;477;478;567;568;601;602;603;604;605;663;664;754;786;787;955;956;957;992;993;994;995;996;997;1072;1163;1370;1371;1554;1555;1556;1557;1558;1559;1567;1570;1571;2067;2092;2093;2094;2122;2220;2221;2222;2241;2688;2794;2869;3130;3131;3132;3133;3134;3135;3136;3204;3205;3237;3286;3287;3288;3307;3308;3444;3445;3446;3447;3448;3449;3502;3705;3706;3707;3708;3709;3710;4062;4528;4…	93;125;411;475;477;478;568;603;605;664;754;786;787;956;994;997;1072;1163;1371;1554;1558;1567;1571;2067;2093;2122;2221;2241;2688;2794;2869;3130;3136;3205;3237;3287;3288;3308;3445;3448;3502;3707;4062;4528;4531;4677;4898;4927	1	111
CON__P12763	CON__P12763	14	14	12	>P12763 SWISS-PROT:P12763 (Bos taurus) Alpha-2-HS-glycoprotein precursor	1	14	14	12	14	14	12	39	39	35.4	38.418	359	359	0	161.54	39	201150000	201150000	33			+	2	126;179;250;251;530;804;805;877;881;882;1664;1716;1717;2090	True;True;True;True;True;True;True;True;True;True;True;True;True;True	129;184;257;258;549;831;832;905;910;911;1726;1783;1784;1785;2170	143;210;211;290;291;292;615;616;937;938;939;1019;1024;1025;1982;2046;2047;2048;2049;2050;2051;2477	231;232;349;350;351;352;353;354;355;481;482;483;484;485;486;487;488;987;988;989;1475;1476;1477;1478;1595;1596;1605;1606;1607;1608;1609;3116;3214;3215;3216;3217;3218;3219;3220;3221;3222;3223;3224;3225;3226;3929	231;350;482;487;987;1475;1478;1595;1607;1608;3116;3224;3225;3929
CON__P34955	CON__P34955	8	8	8	>P34955 SWISS-PROT:P34955 (Bos taurus) Alpha-1-antiproteinase precursor	1	8	8	8	8	8	8	22.8	22.8	22.8	46.103	416	416	0	75.733	22.8	26842000	26842000	17			+	3	322;1115;1372;1391;1937;1938;2279;2405	True;True;True;True;True;True;True;True	331;1153;1418;1437;2012;2013;2367;2495	367;1288;1582;1602;2297;2298;2890;2891;3034	615;2016;2441;2471;2472;3622;3623;3624;4607;4608;4609;4610;4611;4612;4613;4850;4851	615;2016;2441;2472;3622;3624;4611;4851
CON__Q29443;CON__Q0IIK2;CON__Q2HJF0	CON__Q29443;CON__Q0IIK2	26;26;1	26;26;1	26;26;1	>Q29443 SWISS-PROT:Q29443 Serotransferrin - Bos taurus (Bovine).;>Q0IIK2 TREMBL:Q0IIK2 (Bos taurus) Transferrin	3	26	26	26	26	26	26	49.5	49.5	49.5	75.829	685	685;704;622	0	224.08	49.5	104230000	104230000	39			+	4	3;242;331;348;371;479;497;646;753;779;806;875;990;998;1006;1144;1218;1454;1577;1636;1941;2101;2123;2379;2381;2393	True;True;True;True;True;True;True;True;True;True;True;True;True;True;True;True;True;True;True;True;True;True;True;True;True;True	3;249;340;358;383;494;512;668;779;806;833;903;1022;1031;1040;1182;1257;1501;1632;1696;2016;2181;2204;2468;2470;2482	3;282;380;381;400;401;431;555;575;751;881;908;940;1017;1148;1158;1167;1320;1398;1722;1866;1944;2301;2489;2518;3002;3004;3019	5;469;630;631;657;658;706;885;920;1204;1388;1431;1432;1479;1592;1593;1807;1808;1824;1835;1836;2058;2161;2713;2714;2934;3059;3632;3949;3950;3951;3994;4791;4792;4794;4795;4820;4821;4822;4823	5;469;630;657;706;885;920;1204;1388;1431;1479;1593;1807;1824;1836;2058;2161;2714;2934;3059;3632;3951;3994;4791;4794;4820
sp|Q13765|NACA_HUMAN;sp|E9PAV3|NACAM_HUMAN	sp|Q13765|NACA_HUMAN;sp|E9PAV3|NACAM_HUMAN	4;4	4;4	4;4	>sp|Q13765|NACA_HUMAN Nascent polypeptide-associated complex subunit alpha OS=Homo sapiens OX=9606 GN=NACA PE=1 SV=1;>sp|E9PAV3|NACAM_HUMAN Nascent polypeptide-associated complex subunit alpha, muscle-specific form OS=Homo sapiens OX=9606 GN=NACA PE=1 SV=1	2	4	4	4	4	4	4	21.9	21.9	21.9	23.384	215	215;2078	0	40.162	21.9	4239300	4239300	6				5	131;927;1600;1885	True;True;True;True	134;956;1658;1960	149;1073;1901;2242	239;1682;2989;2990;3534;3535	239;1682;2990;3535
sp|O00151|PDLI1_HUMAN	sp|O00151|PDLI1_HUMAN	4	4	4	>sp|O00151|PDLI1_HUMAN PDZ and LIM domain protein 1 OS=Homo sapiens OX=9606 GN=PDLIM1 PE=1 SV=4	1	4	4	4	4	4	4	21	21	21	36.071	329	329	0	29.719	21	6104600	6104600	4				6	1419;1791;2145;2260	True;True;True;True	1465;1862;2228;2347	1685;2132;2544;2867	2649;3346;4038;4573	2649;3346;4038;4573
sp|O00299|CLIC1_HUMAN	sp|O00299|CLIC1_HUMAN	5	5	5	>sp|O00299|CLIC1_HUMAN Chloride intracellular channel protein 1 OS=Homo sapiens OX=9606 GN=CLIC1 PE=1 SV=4	1	5	5	5	5	5	5	36.1	36.1	36.1	26.922	241	241	0	64.2	36.1	17802000	17802000	8				7	431;1187;1616;2277;2442	True;True;True;True;True	445;1225;1676;2365;2532	500;1364;1923;2888;3074	801;802;2108;2109;3026;4603;4604;4912	802;2109;3026;4604;4912
sp|O00592|PODXL_HUMAN	sp|O00592|PODXL_HUMAN	4	4	4	>sp|O00592|PODXL_HUMAN Podocalyxin OS=Homo sapiens OX=9606 GN=PODXL PE=1 SV=2	1	4	4	4	4	4	4	11.5	11.5	11.5	58.635	558	558	0	45.624	11.5	13192000	13192000	8				8	210;252;1208;1405	True;True;True;True	215;259;1246;1451	245;293;1387;1669	413;414;489;490;2143;2144;2625;2626	414;490;2143;2625
sp|O14745|NHRF1_HUMAN	sp|O14745|NHRF1_HUMAN	7	7	7	>sp|O14745|NHRF1_HUMAN Na(+)/H(+) exchange regulatory cofactor NHE-RF1 OS=Homo sapiens OX=9606 GN=SLC9A3R1 PE=1 SV=4	1	7	7	7	7	7	7	29.1	29.1	29.1	38.868	358	358	0	89.112	29.1	13381000	13381000	19				9	88;176;1064;1331;1417;1418;1933	True;True;True;True;True;True;True	89;181;1101;1375;1463;1464;2008	98;206;1235;1532;1683;1684;2293	164;340;341;342;1941;2366;2367;2368;2369;2646;2647;2648;3611;3612;3613;3614;3615;3616;3617	164;341;1941;2369;2646;2648;3613
sp|O43175|SERA_HUMAN	sp|O43175|SERA_HUMAN	7	7	7	>sp|O43175|SERA_HUMAN D-3-phosphoglycerate dehydrogenase OS=Homo sapiens OX=9606 GN=PHGDH PE=1 SV=4	1	7	7	7	7	7	7	21.4	21.4	21.4	56.65	533	533	0	49.114	21.4	5737500	5737500	8				10	97;143;147;261;999;2054;2097	True;True;True;True;True;True;True	98;148;152;268;1032;2131;2177	107;170;174;302;1159;2434;2484;2485	175;286;290;508;1825;3853;3941;3942;3943	175;286;290;508;1825;3853;3942
sp|O43707|ACTN4_HUMAN;sp|Q9H254|SPTN4_HUMAN	sp|O43707|ACTN4_HUMAN	35;1	35;1	26;1	>sp|O43707|ACTN4_HUMAN Alpha-actinin-4 OS=Homo sapiens OX=9606 GN=ACTN4 PE=1 SV=2	2	35	35	26	35	35	26	48.8	48.8	37	104.85	911	911;2564	0	323.31	48.8	107030000	107030000	53				11	30;121;195;197;277;327;336;337;392;408;480;511;542;719;869;883;913;1040;1083;1089;1109;1338;1390;1394;1436;1462;1494;1524;1633;1679;1746;2039;2040;2199;2275	True;True;True;True;True;True;True;True;True;True;True;True;True;True;True;True;True;True;True;True;True;True;True;True;True;True;True;True;True;True;True;True;True;True;True	30;124;200;202;285;336;346;347;405;422;495;528;561;744;745;897;912;942;1077;1120;1126;1147;1383;1436;1440;1482;1509;1546;1578;1693;1745;1815;2116;2117;2284;2363	35;137;228;230;319;373;374;387;388;454;475;556;593;628;839;840;1011;1026;1059;1208;1254;1260;1281;1543;1601;1605;1703;1730;1769;1807;1941;2005;2082;2417;2418;2792;2886	56;219;384;387;549;622;623;641;642;737;764;886;887;948;949;1011;1012;1330;1331;1332;1585;1586;1610;1611;1612;1655;1900;1969;1975;2007;2008;2384;2469;2470;2475;2680;2681;2728;2729;2730;2784;2840;2841;3055;3150;3271;3823;3824;3825;3826;3827;4462;4463;4600;4601	56;219;384;387;549;623;641;642;737;764;886;948;1011;1332;1586;1611;1655;1900;1969;1975;2008;2384;2470;2475;2681;2730;2784;2840;3055;3150;3271;3824;3826;4462;4601	2	767
sp|O75083|WDR1_HUMAN	sp|O75083|WDR1_HUMAN	4	4	4	>sp|O75083|WDR1_HUMAN WD repeat-containing protein 1 OS=Homo sapiens OX=9606 GN=WDR1 PE=1 SV=4	1	4	4	4	4	4	4	8.9	8.9	8.9	66.193	606	606	0	24.391	8.9	2222700	2222700	5				12	396;562;912;2401	True;True;True;True	410;581;941;2491	463;650;1058;3029	748;1043;1654;4841;4842	748;1043;1654;4842
sp|O75369|FLNB_HUMAN	sp|O75369|FLNB_HUMAN	39	39	38	>sp|O75369|FLNB_HUMAN Filamin-B OS=Homo sapiens OX=9606 GN=FLNB PE=1 SV=2	1	39	39	38	39	39	38	23.6	23.6	23.3	278.16	2602	2602	0	317.97	23.6	46407000	46407000	51				13	94;112;237;269;289;417;591;627;736;937;939;1015;1103;1317;1361;1439;1470;1471;1551;1649;1821;1888;1889;1890;1998;2011;2167;2184;2202;2215;2241;2294;2306;2320;2341;2344;2360;2420;2444	True;True;True;True;True;True;True;True;True;True;True;True;True;True;True;True;True;True;True;True;True;True;True;True;True;True;True;True;True;True;True;True;True;True;True;True;True;True;True	95;113;244;276;297;431;611;649;762;966;968;1050;1141;1360;1406;1485;1519;1520;1606;1709;1893;1963;1964;1965;2073;2087;2251;2269;2288;2301;2327;2382;2395;2409;2430;2433;2449;2510;2534	104;125;277;310;331;485;682;731;864;1083;1085;1178;1275;1514;1570;1706;1740;1741;1835;1962;2164;2245;2246;2247;2368;2386;2755;2775;2796;2810;2841;2908;2921;2937;2960;2963;2979;3051;3076	171;172;201;202;462;524;565;781;1091;1169;1170;1364;1365;1700;1702;1857;1858;1998;2340;2422;2685;2686;2744;2745;2746;2887;2888;3084;3392;3393;3540;3541;3542;3543;3747;3768;4412;4435;4473;4474;4492;4536;4537;4640;4660;4683;4684;4724;4731;4732;4756;4757;4871;4914	172;202;462;524;565;781;1091;1169;1365;1700;1702;1858;1998;2340;2422;2686;2744;2746;2887;3084;3392;3541;3542;3543;3747;3768;4412;4435;4473;4492;4537;4640;4660;4684;4724;4732;4756;4871;4914
sp|O75439|MPPB_HUMAN	sp|O75439|MPPB_HUMAN	4	4	4	>sp|O75439|MPPB_HUMAN Mitochondrial-processing peptidase subunit beta OS=Homo sapiens OX=9606 GN=PMPCB PE=1 SV=2	1	4	4	4	4	4	4	13.5	13.5	13.5	54.366	489	489	0	24.164	13.5	1822500	1822500	5				14	487;1884;1930;2038	True;True;True;True	502;1959;2005;2115	563;2241;2290;2416	896;897;3533;3605;3821;3822	896;3533;3605;3821
sp|O75874|IDHC_HUMAN	sp|O75874|IDHC_HUMAN	10	10	10	>sp|O75874|IDHC_HUMAN Isocitrate dehydrogenase [NADP] cytoplasmic OS=Homo sapiens OX=9606 GN=IDH1 PE=1 SV=2	1	10	10	10	10	10	10	30.2	30.2	30.2	46.659	414	414	0	83.174	30.2	15740000	15740000	14				15	244;290;579;580;1039;1435;1842;2121;2198;2359	True;True;True;True;True;True;True;True;True;True	251;298;599;600;1076;1481;1917;2202;2283;2448	284;332;669;670;671;1207;1702;2193;2515;2516;2791;2978	471;566;1069;1070;1071;1899;2679;3453;3991;3992;4460;4461;4754;4755	471;566;1069;1071;1899;2679;3453;3991;4461;4755
sp|P00338|LDHA_HUMAN	sp|P00338|LDHA_HUMAN	8	7	7	>sp|P00338|LDHA_HUMAN L-lactate dehydrogenase A chain OS=Homo sapiens OX=9606 GN=LDHA PE=1 SV=2	1	8	7	7	8	7	7	38.3	34.6	34.6	36.688	332	332	0	62.575	38.3	27041000	27041000	19				16	659;1057;1279;1319;1422;1787;2247;2350	True;True;True;True;True;True;False;True	681;1094;1321;1362;1468;1858;2333;2439	764;1225;1226;1471;1516;1517;1688;2128;2847;2969	1220;1920;1921;1922;1923;1924;1925;1926;2267;2342;2343;2344;2345;2346;2347;2348;2652;3339;4545;4546;4547;4740	1220;1922;2267;2344;2652;3339;4546;4740
sp|P00367|DHE3_HUMAN;sp|P49448|DHE4_HUMAN	sp|P00367|DHE3_HUMAN;sp|P49448|DHE4_HUMAN	23;14	23;14	23;14	>sp|P00367|DHE3_HUMAN Glutamate dehydrogenase 1, mitochondrial OS=Homo sapiens OX=9606 GN=GLUD1 PE=1 SV=2;>sp|P49448|DHE4_HUMAN Glutamate dehydrogenase 2, mitochondrial OS=Homo sapiens OX=9606 GN=GLUD2 PE=1 SV=2	2	23	23	23	23	23	23	51.3	51.3	51.3	61.397	558	558;558	0	227.84	51.3	324240000	324240000	48				17	118;120;245;265;345;377;468;636;677;828;962;963;967;1037;1517;1581;1639;1752;1949;1958;2006;2448;2457	True;True;True;True;True;True;True;True;True;True;True;True;True;True;True;True;True;True;True;True;True;True;True	120;122;123;252;272;355;389;483;658;699;700;855;991;992;996;1074;1571;1636;1699;1821;2024;2033;2081;2082;2538;2547	132;133;135;136;285;306;396;437;542;741;783;784;785;964;965;1109;1110;1115;1116;1205;1798;1872;1947;2090;2312;2313;2314;2325;2378;2379;2380;3081;3090	213;214;215;217;218;472;473;515;516;517;653;715;716;869;1188;1247;1248;1249;1250;1519;1520;1521;1736;1737;1738;1739;1740;1746;1747;1895;1896;1897;2829;2941;3064;3065;3281;3651;3652;3653;3654;3680;3758;3759;3760;3761;4928;4929;4943;4944;4945	215;218;473;517;653;716;869;1188;1249;1521;1736;1739;1746;1896;2829;2941;3064;3281;3651;3680;3760;4929;4944	3;4;5	168;226;317
sp|P00441|SODC_HUMAN	sp|P00441|SODC_HUMAN	5	5	5	>sp|P00441|SODC_HUMAN Superoxide dismutase [Cu-Zn] OS=Homo sapiens OX=9606 GN=SOD1 PE=1 SV=2	1	5	5	5	5	5	5	66.9	66.9	66.9	15.936	154	154	0	71.079	66.9	18302000	18302000	11				18	33;221;643;734;887	True;True;True;True;True	33;227;665;760;916	38;259;748;857;1031	60;61;433;434;1199;1200;1356;1357;1618;1619;1620	60;434;1200;1357;1620
sp|P00505|AATM_HUMAN	sp|P00505|AATM_HUMAN	14	14	14	>sp|P00505|AATM_HUMAN Aspartate aminotransferase, mitochondrial OS=Homo sapiens OX=9606 GN=GOT2 PE=1 SV=3	1	14	14	14	14	14	14	39.3	39.3	39.3	47.517	430	430	0	121.04	39.3	49945000	49945000	17				19	192;292;447;618;896;947;996;1080;1154;1291;1587;1647;2094;2210	True;True;True;True;True;True;True;True;True;True;True;True;True;True	197;300;462;640;925;976;1028;1117;1192;1333;1643;1707;2174;2296	225;334;519;720;1040;1093;1154;1251;1330;1483;1881;1958;2481;2805	378;379;569;831;832;1154;1155;1629;1714;1815;1966;2068;2285;2956;3077;3937;4486	378;569;832;1155;1629;1714;1815;1966;2068;2285;2956;3077;3937;4486	6	315
sp|P00558|PGK1_HUMAN;sp|P07205|PGK2_HUMAN	sp|P00558|PGK1_HUMAN	18;3	18;3	18;3	>sp|P00558|PGK1_HUMAN Phosphoglycerate kinase 1 OS=Homo sapiens OX=9606 GN=PGK1 PE=1 SV=3	2	18	18	18	18	18	18	64.7	64.7	64.7	44.614	417	417;417	0	186.72	64.7	76812000	76812000	30				20	29;101;134;311;548;641;1054;1254;1410;1599;1693;1866;1942;2017;2179;2263;2290;2392	True;True;True;True;True;True;True;True;True;True;True;True;True;True;True;True;True;True	29;102;137;320;567;663;1091;1296;1456;1657;1760;1941;2017;2093;2263;2264;2350;2378;2481	33;34;111;112;152;355;634;746;1222;1444;1675;1900;2022;2023;2222;2302;2303;2392;2767;2768;2870;2902;3017;3018	52;53;54;55;180;181;243;597;1019;1196;1917;2232;2233;2635;2988;3178;3179;3180;3505;3633;3634;3635;3636;3637;3638;3779;4427;4428;4577;4630;4631;4818;4819	54;180;243;597;1019;1196;1917;2232;2635;2988;3179;3505;3635;3779;4427;4577;4630;4819	7	29
sp|P02786|TFR1_HUMAN	sp|P02786|TFR1_HUMAN	7	7	7	>sp|P02786|TFR1_HUMAN Transferrin receptor protein 1 OS=Homo sapiens OX=9606 GN=TFRC PE=1 SV=2	1	7	7	7	7	7	7	12	12	12	84.87	760	760	0	50.149	12	10029000	10029000	10				21	230;406;681;1212;1324;1414;1907	True;True;True;True;True;True;True	236;420;704;1251;1367;1460;1982	269;473;789;1392;1522;1680;2265	450;761;762;1255;2151;2152;2153;2355;2643;3571	450;762;1255;2152;2355;2643;3571
sp|P04040|CATA_HUMAN	sp|P04040|CATA_HUMAN	6	6	6	>sp|P04040|CATA_HUMAN Catalase OS=Homo sapiens OX=9606 GN=CAT PE=1 SV=3	1	6	6	6	6	6	6	15.6	15.6	15.6	59.755	527	527	0	76.298	15.6	7375900	7375900	8				22	79;593;750;1271;1396;1429	True;True;True;True;True;True	79;613;776;1313;1442;1475	88;684;685;878;1463;1607;1695	148;1093;1094;1385;2258;2477;2478;2663	148;1093;1385;2258;2477;2663
sp|P04075|ALDOA_HUMAN	sp|P04075|ALDOA_HUMAN	15	15	15	>sp|P04075|ALDOA_HUMAN Fructose-bisphosphate aldolase A OS=Homo sapiens OX=9606 GN=ALDOA PE=1 SV=2	1	15	15	15	15	15	15	57.1	57.1	57.1	39.42	364	364	0	130.75	57.1	41421000	41421000	19				23	17;32;142;144;275;482;710;1374;1375;1650;1703;1765;2130;2185;2460	True;True;True;True;True;True;True;True;True;True;True;True;True;True;True	17;32;147;149;283;497;735;1420;1421;1710;1770;1835;2211;2270;2550	18;37;169;171;317;558;829;1584;1585;1963;2033;2104;2525;2776;3093	29;59;285;287;546;547;889;1315;1316;2444;2445;3085;3086;3196;3304;4006;4007;4436;4950	29;59;285;287;546;889;1316;2444;2445;3085;3196;3304;4007;4436;4950
sp|P04181|OAT_HUMAN	sp|P04181|OAT_HUMAN	8	8	8	>sp|P04181|OAT_HUMAN Ornithine aminotransferase, mitochondrial OS=Homo sapiens OX=9606 GN=OAT PE=1 SV=1	1	8	8	8	8	8	8	21.2	21.2	21.2	48.534	439	439	0	63.654	21.2	15947000	15947000	13				24	78;361;730;1362;1379;1902;2131;2291	True;True;True;True;True;True;True;True	78;373;756;1407;1425;1977;2212;2379	87;418;853;1571;1589;2259;2526;2903	147;680;1351;2423;2424;2425;2426;2427;2451;3560;4008;4632;4633	147;680;1351;2424;2451;3560;4008;4632
sp|P04264|K2C1_HUMAN	sp|P04264|K2C1_HUMAN	48	48	2	>sp|P04264|K2C1_HUMAN Keratin, type II cytoskeletal 1 OS=Homo sapiens OX=9606 GN=KRT1 PE=1 SV=6	1	48	48	2	48	48	2	64	64	3.3	66.038	644	644	0	323.31	64	2434100000	2434100000	199				25	47;48;188;384;395;585;586;605;688;698;769;931;1093;1151;1198;1224;1230;1329;1343;1344;1381;1508;1567;1568;1569;1570;1590;1613;1691;1779;1810;1825;1846;1852;1853;1856;1857;1868;1869;2029;2030;2057;2076;2077;2329;2382;2410;2413	True;True;True;True;True;True;True;True;True;True;True;True;True;True;True;True;True;True;True;True;True;True;True;True;True;True;True;True;True;True;True;True;True;True;True;True;True;True;True;True;True;True;True;True;True;True;True;True	47;48;193;396;397;408;409;605;606;626;711;723;796;960;1130;1131;1189;1236;1263;1269;1270;1271;1372;1373;1388;1389;1427;1560;1561;1622;1623;1624;1625;1646;1647;1648;1672;1758;1849;1881;1898;1921;1927;1928;1931;1932;1943;1944;2105;2106;2135;2156;2157;2418;2471;2500;2503	55;56;221;444;445;446;457;458;459;460;461;462;676;677;699;700;701;702;703;704;705;796;797;817;898;1077;1264;1265;1327;1375;1376;1405;1411;1412;1413;1527;1528;1529;1530;1548;1549;1550;1591;1784;1785;1786;1787;1853;1854;1855;1856;1857;1858;1859;1884;1885;1886;1887;1888;1889;1890;1891;1918;1919;2019;2020;2118;2152;2170;2197;2204;2205;2206;2207;2210;2211;2212;2213;2224;2225;2226;2404;2405;2406;2407;2…	85;86;87;88;374;725;726;727;728;741;742;743;744;745;746;747;1077;1078;1079;1080;1081;1082;1083;1121;1122;1123;1124;1125;1126;1127;1128;1129;1130;1131;1132;1133;1134;1135;1264;1265;1266;1267;1268;1269;1270;1271;1272;1273;1298;1299;1416;1690;1691;1692;1980;1981;1982;1983;1984;2065;2123;2124;2125;2170;2171;2179;2180;2181;2182;2183;2360;2361;2362;2363;2364;2393;2394;2395;2396;2397;2398;2453;2454;2803…	87;88;374;725;747;1080;1082;1123;1271;1299;1416;1692;1983;2065;2125;2171;2180;2362;2394;2397;2454;2804;2914;2915;2920;2923;2976;3020;3173;3328;3375;3411;3464;3476;3482;3487;3491;3508;3512;3798;3803;3859;3900;3903;4696;4799;4857;4863	8;9;10;11;12	259;262;296;469;493
sp|P04406|G3P_HUMAN	sp|P04406|G3P_HUMAN	15	15	15	>sp|P04406|G3P_HUMAN Glyceraldehyde-3-phosphate dehydrogenase OS=Homo sapiens OX=9606 GN=GAPDH PE=1 SV=3	1	15	15	15	15	15	15	60.3	60.3	60.3	36.053	335	335	0	265.62	60.3	514870000	514870000	49				26	56;632;712;975;985;1295;1423;1424;1781;2248;2250;2319;2364;2365;2383	True;True;True;True;True;True;True;True;True;True;True;True;True;True;True	56;654;737;1005;1016;1017;1337;1469;1470;1852;2334;2335;2337;2408;2453;2454;2472	64;65;736;831;1125;1126;1141;1142;1487;1689;1690;2121;2848;2849;2850;2851;2852;2853;2855;2936;2983;2984;2985;2986;3007	101;102;1178;1179;1180;1181;1319;1320;1321;1763;1764;1765;1798;1799;2292;2293;2294;2653;2654;2655;2656;2657;2658;3331;4548;4549;4550;4551;4552;4553;4554;4555;4556;4557;4558;4560;4681;4682;4762;4763;4764;4765;4766;4767;4768;4769;4770;4801;4802	101;1180;1320;1764;1799;2293;2654;2657;3331;4554;4560;4682;4763;4768;4802	13;14	105;175
sp|P04843|RPN1_HUMAN	sp|P04843|RPN1_HUMAN	4	4	4	>sp|P04843|RPN1_HUMAN Dolichyl-diphosphooligosaccharide--protein glycosyltransferase subunit 1 OS=Homo sapiens OX=9606 GN=RPN1 PE=1 SV=1	1	4	4	4	4	4	4	8.9	8.9	8.9	68.569	607	607	0	24.715	8.9	4963700	4963700	5				27	614;652;824;2242	True;True;True;True	635;674;851;2328	715;757;959;2842	1148;1210;1509;1510;1511;4538	1148;1210;1510;4538
sp|P05023|AT1A1_HUMAN;sp|P13637|AT1A3_HUMAN;sp|P50993|AT1A2_HUMAN;sp|Q13733|AT1A4_HUMAN;sp|P20648|ATP4A_HUMAN;sp|P54707|AT12A_HUMAN	sp|P05023|AT1A1_HUMAN;sp|P13637|AT1A3_HUMAN;sp|P50993|AT1A2_HUMAN	26;15;13;7;3;3	26;15;13;7;3;3	26;15;13;7;3;3	>sp|P05023|AT1A1_HUMAN Sodium/potassium-transporting ATPase subunit alpha-1 OS=Homo sapiens OX=9606 GN=ATP1A1 PE=1 SV=1;>sp|P13637|AT1A3_HUMAN Sodium/potassium-transporting ATPase subunit alpha-3 OS=Homo sapiens OX=9606 GN=ATP1A3 PE=1 SV=3;>sp|P50993|AT1A2	6	26	26	26	26	26	26	33.3	33.3	33.3	112.89	1023	1023;1013;1020;1029;1035;1039	0	263.37	33.3	71746000	71746000	46				28	26;31;39;216;227;350;491;528;789;1062;1290;1347;1510;1572;1573;1592;1606;1618;1652;1676;1677;1886;2021;2188;2252;2430	True;True;True;True;True;True;True;True;True;True;True;True;True;True;True;True;True;True;True;True;True;True;True;True;True;True	26;31;39;221;233;360;506;547;816;1099;1332;1392;1563;1627;1628;1650;1664;1678;1712;1742;1743;1961;2097;2273;2339;2520	29;36;44;251;266;403;567;613;921;1233;1482;1554;1789;1861;1862;1893;1907;1908;1925;1965;1966;2002;2003;2243;2396;2779;2858;2859;3061	46;57;58;71;423;446;447;660;903;904;905;985;1447;1448;1937;1938;2283;2284;2403;2404;2818;2929;2930;2978;3001;3002;3030;3088;3089;3090;3091;3146;3147;3148;3536;3537;3538;3783;4439;4440;4441;4442;4443;4563;4564;4889	46;58;71;423;446;660;905;985;1448;1938;2284;2403;2818;2929;2930;2978;3002;3030;3091;3146;3147;3537;3783;4441;4563;4889
sp|P05091|ALDH2_HUMAN	sp|P05091|ALDH2_HUMAN	13	13	13	>sp|P05091|ALDH2_HUMAN Aldehyde dehydrogenase, mitochondrial OS=Homo sapiens OX=9606 GN=ALDH2 PE=1 SV=2	1	13	13	13	13	13	13	30.8	30.8	30.8	56.381	517	517	0	110.38	30.8	38435000	38435000	23				29	11;157;820;994;1270;1311;1991;2005;2149;2150;2255;2256;2368	True;True;True;True;True;True;True;True;True;True;True;True;True	11;162;847;1026;1312;1353;2066;2080;2232;2233;2342;2343;2457	11;184;954;1152;1462;1504;1505;2361;2376;2377;2548;2549;2862;2863;2990	19;308;309;1502;1503;1813;2256;2257;2323;2324;2325;2326;2327;3739;3756;3757;4042;4043;4567;4568;4569;4774;4775;4776	19;308;1502;1813;2256;2325;3739;3756;4042;4043;4567;4569;4776
sp|P05388|RLA0_HUMAN;sp|Q8NHW5|RLA0L_HUMAN	sp|P05388|RLA0_HUMAN;sp|Q8NHW5|RLA0L_HUMAN	8;6	8;6	8;6	>sp|P05388|RLA0_HUMAN 60S acidic ribosomal protein P0 OS=Homo sapiens OX=9606 GN=RPLP0 PE=1 SV=1;>sp|Q8NHW5|RLA0L_HUMAN 60S acidic ribosomal protein P0-like OS=Homo sapiens OX=9606 GN=RPLP0P6 PE=5 SV=1	2	8	8	8	8	8	8	35.3	35.3	35.3	34.273	317	317;317	0	60.226	35.3	17216000	17216000	9				30	71;259;701;780;974;1708;2102;2271	True;True;True;True;True;True;True;True	71;266;726;807;1004;1775;2182;2359	80;300;820;909;1124;2038;2490;2882	135;505;506;1303;1304;1433;1762;3202;3952;4594	135;506;1304;1433;1762;3202;3952;4594	15	40
sp|P05556|ITB1_HUMAN	sp|P05556|ITB1_HUMAN	6	6	6	>sp|P05556|ITB1_HUMAN Integrin beta-1 OS=Homo sapiens OX=9606 GN=ITGB1 PE=1 SV=2	1	6	6	6	6	6	6	9.5	9.5	9.5	88.414	798	798	0	41.734	9.5	6210000	6210000	10				31	347;545;705;1304;1796;1877	True;True;True;True;True;True	357;564;730;1346;1867;1952	398;399;631;824;1497;2137;2234	655;656;1015;1310;2309;2310;2311;3351;3521;3522	655;1015;1310;2311;3351;3522
sp|P05783|K1C18_HUMAN;sp|Q92764|KRT35_HUMAN	sp|P05783|K1C18_HUMAN	28;1	28;1	18;0	>sp|P05783|K1C18_HUMAN Keratin, type I cytoskeletal 18 OS=Homo sapiens OX=9606 GN=KRT18 PE=1 SV=2	2	28	28	18	28	28	18	66.5	66.5	47.7	48.057	430	430;455	0	323.31	66.5	483440000	483440000	83				32	180;187;200;508;693;694;731;1067;1173;1233;1314;1370;1558;1648;1657;1722;1723;1759;1763;1861;1862;1920;2132;2267;2268;2373;2398;2418	True;True;True;True;True;True;True;True;True;True;True;True;True;True;True;True;True;True;True;True;True;True;True;True;True;True;True;True	185;192;205;524;525;716;717;718;719;757;1104;1211;1274;1356;1357;1415;1416;1613;1708;1718;1790;1791;1828;1832;1833;1936;1937;1995;2213;2214;2354;2355;2356;2462;2487;2488;2508	212;220;234;589;590;805;806;807;808;809;810;811;854;1238;1349;1417;1508;1509;1510;1511;1579;1580;1842;1843;1959;1960;1961;1973;1974;2057;2058;2097;2101;2102;2217;2218;2280;2527;2528;2875;2876;2877;2878;2996;3024;3025;3026;3049	356;357;358;371;372;373;394;395;396;397;940;941;942;943;944;1281;1282;1283;1284;1285;1286;1287;1288;1289;1290;1291;1352;1946;1947;1948;1949;2091;2187;2188;2330;2331;2332;2333;2334;2335;2336;2337;2437;2438;2439;2898;2899;2900;3078;3079;3080;3081;3082;3083;3102;3103;3104;3234;3235;3236;3294;3298;3299;3300;3301;3496;3497;3498;3499;3591;4009;4010;4583;4584;4585;4586;4587;4588;4589;4590;4784;4833;4834…	357;373;396;942;1284;1291;1352;1947;2091;2188;2333;2438;2899;3079;3103;3235;3236;3294;3299;3497;3498;3591;4010;4584;4589;4784;4835;4869	16;17;18;19;20;21;22;23	58;74;84;174;213;313;335;402
sp|P06576|ATPB_HUMAN	sp|P06576|ATPB_HUMAN	23	23	23	>sp|P06576|ATPB_HUMAN ATP synthase subunit beta, mitochondrial OS=Homo sapiens OX=9606 GN=ATP5F1B PE=1 SV=3	1	23	23	23	23	23	23	61.4	61.4	61.4	56.559	529	529	0	276.17	61.4	140800000	140800000	46				33	41;99;103;370;443;590;612;954;1004;1008;1018;1019;1105;1427;1870;1871;2033;2099;2100;2128;2155;2156;2363	True;True;True;True;True;True;True;True;True;True;True;True;True;True;True;True;True;True;True;True;True;True;True	41;100;104;382;458;610;633;983;1037;1038;1042;1054;1055;1056;1143;1473;1945;1946;2109;2110;2179;2180;2209;2238;2239;2240;2452	47;109;114;429;430;514;681;712;713;1100;1164;1165;1169;1182;1183;1184;1185;1277;1693;2227;2228;2410;2411;2487;2488;2523;2554;2555;2556;2982	75;177;178;184;185;703;704;705;824;825;1090;1144;1145;1724;1831;1832;1833;1840;1841;1864;1865;1866;1867;1868;1869;2000;2661;3513;3514;3812;3813;3814;3815;3945;3946;3947;3948;4002;4003;4004;4049;4050;4051;4052;4053;4054;4761	75;178;184;703;825;1090;1145;1724;1833;1840;1868;1869;2000;2661;3513;3514;3815;3945;3946;4003;4049;4053;4761	24;25;26;27	113;272;339;408
sp|P06733|ENOA_HUMAN;sp|P13929|ENOB_HUMAN;sp|P09104|ENOG_HUMAN	sp|P06733|ENOA_HUMAN	22;2;2	22;2;2	22;2;2	>sp|P06733|ENOA_HUMAN Alpha-enolase OS=Homo sapiens OX=9606 GN=ENO1 PE=1 SV=2	3	22	22	22	22	22	22	62.9	62.9	62.9	47.168	434	434;434;434	0	297.78	62.9	151120000	151120000	53				34	28;307;308;608;609;745;833;945;1130;1131;1200;1205;1337;1353;1800;1816;1823;1829;2309;2424;2425;2437	True;True;True;True;True;True;True;True;True;True;True;True;True;True;True;True;True;True;True;True;True;True	28;316;317;629;630;771;860;974;1168;1169;1238;1243;1381;1382;1398;1871;1887;1896;1903;2398;2514;2515;2527	31;32;351;352;708;709;873;970;971;1091;1305;1306;1378;1383;1384;1541;1542;1560;2141;2158;2167;2168;2178;2924;2925;3055;3056;3069	48;49;50;51;590;591;592;593;594;1139;1140;1141;1378;1379;1528;1529;1530;1531;1712;2040;2041;2042;2128;2129;2130;2131;2138;2139;2381;2382;2383;2411;3359;3360;3361;3362;3383;3384;3403;3404;3405;3406;3407;3428;3429;4663;4664;4665;4879;4880;4881;4882;4904;4905	49;590;593;1139;1141;1378;1530;1712;2041;2042;2128;2138;2383;2411;3361;3383;3404;3429;4663;4880;4882;4905	28	97
sp|P06744|G6PI_HUMAN	sp|P06744|G6PI_HUMAN	5	5	2	>sp|P06744|G6PI_HUMAN Glucose-6-phosphate isomerase OS=Homo sapiens OX=9606 GN=GPI PE=1 SV=4	1	5	5	2	5	5	2	13.1	13.1	5	63.146	558	558	0	57.932	13.1	16070000	16070000	13				35	538;826;997;2002;2052	True;True;True;True;True	557;853;1029;1030;2077;2129	624;962;1155;1156;1157;2373;2432	1005;1516;1816;1817;1818;1819;1820;1821;1822;1823;3752;3849;3850;3851	1005;1516;1818;3752;3851	29	437
sp|P06748|NPM_HUMAN	sp|P06748|NPM_HUMAN	9	9	9	>sp|P06748|NPM_HUMAN Nucleophosmin OS=Homo sapiens OX=9606 GN=NPM1 PE=1 SV=2	1	9	9	9	9	9	9	45.2	45.2	45.2	32.575	294	294	0	97.631	45.2	35193000	35193000	18				36	40;262;263;756;1513;1879;2133;2134;2187	True;True;True;True;True;True;True;True;True	40;269;270;782;1567;1954;2215;2216;2272	45;46;303;304;884;1793;1794;2236;2529;2530;2778	72;73;74;509;510;511;1393;1394;2823;2824;3525;4011;4012;4013;4014;4015;4016;4438	74;510;511;1394;2823;3525;4012;4016;4438
sp|P06753|TPM3_HUMAN;sp|P67936|TPM4_HUMAN;sp|P09493|TPM1_HUMAN;sp|P07951|TPM2_HUMAN	sp|P06753|TPM3_HUMAN;sp|P67936|TPM4_HUMAN	4;3;1;1	4;3;1;1	3;2;0;0	>sp|P06753|TPM3_HUMAN Tropomyosin alpha-3 chain OS=Homo sapiens OX=9606 GN=TPM3 PE=1 SV=2;>sp|P67936|TPM4_HUMAN Tropomyosin alpha-4 chain OS=Homo sapiens OX=9606 GN=TPM4 PE=1 SV=3	4	4	4	3	4	4	3	14.4	14.4	9.8	32.95	285	285;248;284;284	0	22.639	14.4	4526600	4526600	3				37	6;834;835;1235	True;True;True;True	6;861;862;1276	6;972;973;1419	10;1532;1533;2192	10;1532;1533;2192
sp|P07195|LDHB_HUMAN;sp|Q6ZMR3|LDH6A_HUMAN;sp|P07864|LDHC_HUMAN	sp|P07195|LDHB_HUMAN	14;1;1	14;1;1	13;0;0	>sp|P07195|LDHB_HUMAN L-lactate dehydrogenase B chain OS=Homo sapiens OX=9606 GN=LDHB PE=1 SV=2	3	14	14	13	14	14	13	49.1	49.1	45.5	36.638	334	334;332;332	0	135.61	49.1	104870000	104870000	32				38	463;577;658;735;743;1058;1059;1070;1285;1299;1525;1785;1786;2247	True;True;True;True;True;True;True;True;True;True;True;True;True;True	478;597;680;761;769;1095;1096;1107;1327;1341;1579;1580;1856;1857;2333	537;667;763;858;859;860;861;862;863;871;1227;1228;1229;1230;1241;1477;1492;1808;1809;2125;2126;2127;2847	857;1067;1219;1358;1359;1360;1361;1362;1363;1375;1376;1927;1928;1929;1930;1931;1952;1953;2274;2275;2276;2300;2301;2842;2843;2844;3336;3337;3338;4545;4546;4547	857;1067;1219;1359;1375;1928;1930;1952;2276;2301;2844;3336;3338;4546	30	234
sp|P07237|PDIA1_HUMAN	sp|P07237|PDIA1_HUMAN	18	18	18	>sp|P07237|PDIA1_HUMAN Protein disulfide-isomerase OS=Homo sapiens OX=9606 GN=P4HB PE=1 SV=3	1	18	18	18	18	18	18	46.3	46.3	46.3	57.116	508	508	0	186.72	46.3	74385000	74385000	34				39	402;857;984;989;992;1157;1258;1296;1475;1546;1547;1594;2016;2027;2174;2240;2438;2452	True;True;True;True;True;True;True;True;True;True;True;True;True;True;True;True;True;True	416;884;1015;1021;1024;1195;1300;1338;1524;1525;1601;1602;1652;2092;2103;2258;2326;2528;2542	469;997;1140;1147;1150;1333;1449;1488;1745;1746;1830;1831;1895;2391;2402;2762;2840;3070;3085	755;1563;1564;1795;1796;1797;1805;1806;1810;2072;2239;2240;2295;2750;2751;2752;2753;2877;2878;2879;2880;2881;2882;2980;3776;3777;3778;3791;4421;4422;4535;4906;4907;4934;4935	755;1564;1795;1806;1810;2072;2239;2295;2752;2877;2882;2980;3777;3791;4422;4535;4907;4934	31	425
sp|P07339|CATD_HUMAN	sp|P07339|CATD_HUMAN	4	4	4	>sp|P07339|CATD_HUMAN Cathepsin D OS=Homo sapiens OX=9606 GN=CTSD PE=1 SV=1	1	4	4	4	4	4	4	14.1	14.1	14.1	44.552	412	412	0	45.932	14.1	5774700	5774700	6				40	106;366;554;1312	True;True;True;True	107;378;573;1354	117;424;641;1506	188;189;190;692;693;1030;2328	189;693;1030;2328
sp|P07355|ANXA2_HUMAN;sp|A6NMY6|AXA2L_HUMAN	sp|P07355|ANXA2_HUMAN;sp|A6NMY6|AXA2L_HUMAN	6;5	6;5	6;5	>sp|P07355|ANXA2_HUMAN Annexin A2 OS=Homo sapiens OX=9606 GN=ANXA2 PE=1 SV=2;>sp|A6NMY6|AXA2L_HUMAN Putative annexin A2-like protein OS=Homo sapiens OX=9606 GN=ANXA2P2 PE=5 SV=2	2	6	6	6	6	6	6	23.9	23.9	23.9	38.604	339	339;339	0	43.542	23.9	31369000	31369000	11				41	1393;1665;1790;1985;2079;2081	True;True;True;True;True;True	1439;1727;1861;2060;2159;2161	1604;1983;2131;2355;2466;2468	2474;3117;3118;3344;3345;3727;3728;3729;3910;3913;3914	2474;3117;3344;3728;3910;3914
sp|P07737|PROF1_HUMAN	sp|P07737|PROF1_HUMAN	9	9	7	>sp|P07737|PROF1_HUMAN Profilin-1 OS=Homo sapiens OX=9606 GN=PFN1 PE=1 SV=2	1	9	9	7	9	9	7	66.4	66.4	57.9	15.054	140	140	0	72.24	66.4	27627000	27627000	13				42	376;378;449;1906;1922;1984;2003;2004;2070	True;True;True;True;True;True;True;True;True	388;390;464;1981;1997;2059;2078;2079;2149	436;438;521;2264;2282;2354;2374;2375;2453	714;717;835;3567;3568;3569;3570;3593;3726;3753;3754;3755;3885	714;717;835;3569;3593;3726;3754;3755;3885
sp|P07900|HS90A_HUMAN;sp|Q14568|HS902_HUMAN;sp|Q58FG0|HS905_HUMAN	sp|P07900|HS90A_HUMAN	26;5;2	18;1;2	18;1;2	>sp|P07900|HS90A_HUMAN Heat shock protein HSP 90-alpha OS=Homo sapiens OX=9606 GN=HSP90AA1 PE=1 SV=5	3	26	18	18	26	18	18	39.1	26.1	26.1	84.659	732	732;343;334	0	191.9	39.1	71872000	71872000	31				43	43;161;363;372;427;473;477;797;825;830;838;839;846;855;874;1111;1231;1265;1602;1743;1872;1987;2204;2251;2435;2469	False;True;True;True;False;True;True;False;False;True;True;True;True;False;True;True;True;True;True;True;False;True;True;False;False;True	43;166;375;384;441;488;492;824;852;857;865;866;873;882;902;1149;1272;1307;1660;1812;1947;2062;2290;2338;2525;2559	50;189;420;421;432;496;547;551;552;553;930;960;961;967;976;977;984;995;1016;1284;1414;1415;1457;1903;2079;2229;2357;2798;2856;2857;3067;3102	78;319;683;684;685;686;707;708;709;794;795;796;874;881;882;883;1464;1465;1512;1513;1514;1515;1523;1524;1538;1539;1547;1561;1591;2012;2184;2185;2250;2993;2994;2995;3268;3515;3731;3732;4476;4477;4478;4561;4562;4899;4900;4901;4961	78;319;683;707;796;874;882;1464;1515;1523;1538;1539;1547;1561;1591;2012;2184;2250;2994;3268;3515;3732;4476;4561;4900;4961
sp|P07910|HNRPC_HUMAN;sp|P0DMR1|HNRC4_HUMAN;sp|O60812|HNRC1_HUMAN;sp|B7ZW38|HNRC3_HUMAN;sp|B2RXH8|HNRC2_HUMAN	sp|P07910|HNRPC_HUMAN	4;1;1;1;1	4;1;1;1;1	4;1;1;1;1	>sp|P07910|HNRPC_HUMAN Heterogeneous nuclear ribonucleoproteins C1/C2 OS=Homo sapiens OX=9606 GN=HNRNPC PE=1 SV=4	5	4	4	4	4	4	4	13.4	13.4	13.4	33.67	306	306;293;293;293;293	0	32.692	13.4	11452000	11452000	6				44	666;1156;1301;2316	True;True;True;True	688;1194;1343;2405	771;1332;1494;2932	1231;2070;2071;2303;2304;4675	1231;2071;2304;4675
sp|P07954|FUMH_HUMAN	sp|P07954|FUMH_HUMAN	9	9	9	>sp|P07954|FUMH_HUMAN Fumarate hydratase, mitochondrial OS=Homo sapiens OX=9606 GN=FH PE=1 SV=3	1	9	9	9	9	9	9	31.6	31.6	31.6	54.636	510	510	0	136.92	31.6	18973000	18973000	16				45	1;7;504;1073;1339;1342;1556;1830;2031	True;True;True;True;True;True;True;True;True	1;7;519;1110;1384;1387;1611;1904;2107	1;7;583;1244;1544;1547;1840;2179;2408	2;3;11;931;932;933;1958;2385;2391;2392;2894;2895;2896;3430;3809;3810	3;11;932;1958;2385;2391;2895;3430;3810
sp|P08195|4F2_HUMAN	sp|P08195|4F2_HUMAN	11	11	11	>sp|P08195|4F2_HUMAN 4F2 cell-surface antigen heavy chain OS=Homo sapiens OX=9606 GN=SLC3A2 PE=1 SV=3	1	11	11	11	11	11	11	25.9	25.9	25.9	67.993	630	630	0	99.28	25.9	43184000	43184000	13				46	44;316;610;662;738;763;949;1303;2147;2151;2380	True;True;True;True;True;True;True;True;True;True;True	44;325;631;684;764;789;978;1345;2230;2234;2469	51;361;710;767;866;891;1095;1496;2546;2550;3003	79;606;1142;1224;1368;1369;1405;1406;1716;2307;2308;4040;4044;4793	79;606;1142;1224;1368;1406;1716;2308;4040;4044;4793
sp|P08238|HS90B_HUMAN;sp|Q58FF7|H90B3_HUMAN;sp|Q58FF6|H90B4_HUMAN;sp|Q58FG1|HS904_HUMAN	sp|P08238|HS90B_HUMAN	28;8;2;1	27;8;2;1	18;5;0;0	>sp|P08238|HS90B_HUMAN Heat shock protein HSP 90-beta OS=Homo sapiens OX=9606 GN=HSP90AB1 PE=1 SV=4	4	28	27	18	28	27	18	46.4	44.8	33.3	83.263	724	724;597;505;418	0	297.6	46.4	143570000	143570000	52				47	37;43;364;427;475;494;669;797;825;845;855;919;1110;1266;1267;1440;1603;1741;1742;1850;1851;1872;2067;2068;2205;2251;2432;2435	True;True;True;True;False;True;True;True;True;True;True;True;True;True;True;True;True;True;True;True;True;True;True;True;True;True;True;True	37;43;376;441;490;509;691;824;852;872;882;948;1148;1308;1309;1486;1661;1810;1811;1925;1926;1947;2146;2147;2291;2338;2522;2525	42;50;422;496;549;570;571;572;774;930;960;961;983;995;1065;1282;1283;1458;1459;1707;1904;2077;2078;2202;2203;2229;2450;2451;2799;2800;2856;2857;3064;3067	67;78;687;688;794;795;796;877;878;910;911;912;913;914;915;1234;1464;1465;1512;1513;1514;1515;1546;1561;1665;2009;2010;2011;2251;2252;2687;2996;2997;3265;3266;3267;3471;3472;3473;3474;3515;3880;3881;3882;3883;4479;4480;4561;4562;4892;4893;4899;4900;4901	67;78;688;796;878;913;1234;1464;1515;1546;1561;1665;2010;2251;2252;2687;2997;3266;3267;3472;3473;3515;3880;3883;4479;4561;4893;4900
sp|P08559|ODPA_HUMAN;sp|P29803|ODPAT_HUMAN	sp|P08559|ODPA_HUMAN	5;2	5;2	5;2	>sp|P08559|ODPA_HUMAN Pyruvate dehydrogenase E1 component subunit alpha, somatic form, mitochondrial OS=Homo sapiens OX=9606 GN=PDHA1 PE=1 SV=3	2	5	5	5	5	5	5	19.2	19.2	19.2	43.295	390	390;388	0	36.288	19.2	4627900	4627900	5				48	668;700;749;2181;2429	True;True;True;True;True	690;725;775;2266;2519	773;819;877;2772;3060	1233;1302;1384;4432;4888	1233;1302;1384;4432;4888
sp|P08758|ANXA5_HUMAN	sp|P08758|ANXA5_HUMAN	4	4	4	>sp|P08758|ANXA5_HUMAN Annexin A5 OS=Homo sapiens OX=9606 GN=ANXA5 PE=1 SV=2	1	4	4	4	4	4	4	15.6	15.6	15.6	35.936	320	320	0	30.444	15.6	11714000	11714000	4				49	510;729;1809;2296	True;True;True;True	527;755;1880;2384	592;852;2151;2910	947;1350;3374;4642	947;1350;3374;4642
sp|P08865|RSSA_HUMAN	sp|P08865|RSSA_HUMAN	5	5	5	>sp|P08865|RSSA_HUMAN 40S ribosomal protein SA OS=Homo sapiens OX=9606 GN=RPSA PE=1 SV=4	1	5	5	5	5	5	5	27.8	27.8	27.8	32.854	295	295	0	53.909	27.8	5655700	5655700	12				50	38;536;583;1332;2464	True;True;True;True;True	38;555;603;1376;2554	43;622;674;1533;1534;3097	68;69;70;999;1000;1001;1002;1074;1075;2370;2371;4955	69;1000;1074;2370;4955
sp|P09211|GSTP1_HUMAN	sp|P09211|GSTP1_HUMAN	7	7	7	>sp|P09211|GSTP1_HUMAN Glutathione S-transferase P OS=Homo sapiens OX=9606 GN=GSTP1 PE=1 SV=2	1	7	7	7	7	7	7	60.5	60.5	60.5	23.356	210	210	0	89.545	60.5	43710000	43710000	13				51	141;194;598;1496;1645;2055;2436	True;True;True;True;True;True;True	146;199;618;1548;1705;2132;2133;2526	168;227;690;1771;1956;2435;2436;3068	284;382;383;1103;1104;2787;2788;3074;3075;3854;3855;4902;4903	284;383;1104;2787;3074;3854;4903	32	92
sp|P09327|VILI_HUMAN;sp|O75366|AVIL_HUMAN	sp|P09327|VILI_HUMAN	24;1	24;1	24;1	>sp|P09327|VILI_HUMAN Villin-1 OS=Homo sapiens OX=9606 GN=VIL1 PE=1 SV=4	2	24	24	24	24	24	24	37.1	37.1	37.1	92.694	827	827;819	0	214.69	37.1	80845000	80845000	50				52	5;27;389;526;551;648;771;885;1247;1336;1366;1452;1515;1516;1527;1683;1739;1764;1818;1943;2032;2078;2192;2200	True;True;True;True;True;True;True;True;True;True;True;True;True;True;True;True;True;True;True;True;True;True;True;True	5;27;402;545;570;670;798;914;1289;1380;1411;1499;1569;1570;1582;1749;1808;1834;1889;2018;2108;2158;2277;2285	5;30;451;611;637;638;753;900;1028;1433;1434;1435;1539;1540;1575;1720;1796;1797;1811;2009;2075;2103;2160;2304;2409;2465;2783;2784;2793	8;9;47;734;980;1023;1024;1025;1026;1206;1419;1614;1615;2215;2216;2217;2218;2219;2379;2380;2431;2432;2710;2711;2826;2827;2828;2846;2847;3154;3155;3156;3157;3262;3263;3302;3303;3386;3639;3640;3811;3906;3907;3908;3909;4447;4448;4449;4464;4465	9;47;734;980;1025;1206;1419;1615;2219;2379;2432;2711;2826;2827;2847;3156;3262;3303;3386;3639;3811;3908;4449;4465
sp|P09429|HMGB1_HUMAN;sp|B2RPK0|HGB1A_HUMAN	sp|P09429|HMGB1_HUMAN	6;2	6;2	6;2	>sp|P09429|HMGB1_HUMAN High mobility group protein B1 OS=Homo sapiens OX=9606 GN=HMGB1 PE=1 SV=3	2	6	6	6	6	6	6	29.8	29.8	29.8	24.893	215	215;211	0	47.496	29.8	10088000	10088000	7				53	982;983;1112;1129;1256;1771	True;True;True;True;True;True	1013;1014;1150;1167;1298;1841	1138;1139;1285;1304;1447;2110	1792;1793;1794;2013;2039;2237;3313	1792;1794;2013;2039;2237;3313
sp|P09622|DLDH_HUMAN	sp|P09622|DLDH_HUMAN	7	7	7	>sp|P09622|DLDH_HUMAN Dihydrolipoyl dehydrogenase, mitochondrial OS=Homo sapiens OX=9606 GN=DLD PE=1 SV=2	1	7	7	7	7	7	7	17.9	17.9	17.9	54.177	509	509	0	76.904	17.9	19842000	19842000	12				54	35;706;924;1017;1545;1576;2075	True;True;True;True;True;True;True	35;731;953;1052;1053;1600;1631;2155	40;825;1070;1180;1181;1829;1865;2460	64;65;1311;1678;1860;1861;1862;1863;2874;2875;2876;2933;3898	65;1311;1678;1861;2875;2933;3898	33	361
sp|P09651|ROA1_HUMAN;sp|Q32P51|RA1L2_HUMAN	sp|P09651|ROA1_HUMAN	9;3	9;3	9;3	>sp|P09651|ROA1_HUMAN Heterogeneous nuclear ribonucleoprotein A1 OS=Homo sapiens OX=9606 GN=HNRNPA1 PE=1 SV=5	2	9	9	9	9	9	9	31.7	31.7	31.7	38.746	372	372;320	0	86.863	31.7	35068000	35068000	15				55	674;1245;1608;1754;1812;1813;1909;1910;2433	True;True;True;True;True;True;True;True;True	696;1286;1666;1823;1883;1884;1984;1985;2523	779;780;1429;1910;2092;2154;2155;2267;2268;2269;3065	1242;1243;2206;2207;3004;3005;3006;3007;3283;3377;3378;3379;3573;3574;3575;4894;4895	1242;2207;3006;3283;3377;3379;3573;3575;4895
sp|P62987|RL40_HUMAN;sp|P62979|RS27A_HUMAN;sp|P0CG47|UBB_HUMAN;sp|P0CG48|UBC_HUMAN	sp|P62987|RL40_HUMAN;sp|P62979|RS27A_HUMAN;sp|P0CG47|UBB_HUMAN;sp|P0CG48|UBC_HUMAN	5;5;5;5	5;5;5;5	5;5;5;5	>sp|P62987|RL40_HUMAN Ubiquitin-60S ribosomal protein L40 OS=Homo sapiens OX=9606 GN=UBA52 PE=1 SV=2;>sp|P62979|RS27A_HUMAN Ubiquitin-40S ribosomal protein S27a OS=Homo sapiens OX=9606 GN=RPS27A PE=1 SV=2;>sp|P0CG47|UBB_HUMAN Polyubiquitin-B OS=Homo sapien	4	5	5	5	5	5	5	36.7	36.7	36.7	14.728	128	128;156;229;685	0	82.854	36.7	46461000	46461000	16				56	441;501;1020;2043;2064	True;True;True;True;True	456;516;1057;2120;2143	512;579;1186;1187;1188;2421;2446;2447	822;926;927;1870;1871;1872;1873;3831;3832;3833;3871;3872;3873;3874;3875;3876	822;926;1871;3833;3872
sp|P0DMV9|HS71B_HUMAN;sp|P0DMV8|HS71A_HUMAN	sp|P0DMV9|HS71B_HUMAN;sp|P0DMV8|HS71A_HUMAN	16;16	15;15	7;7	>sp|P0DMV9|HS71B_HUMAN Heat shock 70 kDa protein 1B OS=Homo sapiens OX=9606 GN=HSPA1B PE=1 SV=1;>sp|P0DMV8|HS71A_HUMAN Heat shock 70 kDa protein 1A OS=Homo sapiens OX=9606 GN=HSPA1A PE=1 SV=1	2	16	15	7	16	15	7	38.1	36	19.3	70.051	641	641;641	0	125.26	38.1	30230000	30230000	20				57	189;203;296;469;564;699;972;1327;1392;1489;1522;1531;1611;1728;1925;2115	True;True;True;True;True;True;True;True;True;True;True;True;True;True;True;False	194;208;305;484;583;724;1001;1370;1438;1541;1576;1586;1669;1796;2000;2196	222;238;339;543;652;818;1121;1525;1603;1763;1804;1805;1815;1914;2063;2285;2508	375;402;575;870;1045;1300;1301;1756;1757;2358;2473;2777;2837;2838;2852;3012;3013;3014;3241;3242;3596;3979;3980	375;402;575;870;1045;1301;1756;2358;2473;2777;2838;2852;3013;3241;3596;3980
sp|P10599|THIO_HUMAN	sp|P10599|THIO_HUMAN	5	5	5	>sp|P10599|THIO_HUMAN Thioredoxin OS=Homo sapiens OX=9606 GN=TXN PE=1 SV=3	1	5	5	5	5	5	5	43.8	43.8	43.8	11.737	105	105	0	41.876	43.8	30096000	30096000	7				58	271;272;1483;1952;2216	True;True;True;True;True	278;279;1534;1535;2027;2302	312;313;1755;1756;2317;2811	527;528;529;2767;2768;2769;3657;3658;4493	528;529;2768;3658;4493	34	37
sp|P10809|CH60_HUMAN	sp|P10809|CH60_HUMAN	44	44	44	>sp|P10809|CH60_HUMAN 60 kDa heat shock protein, mitochondrial OS=Homo sapiens OX=9606 GN=HSPD1 PE=1 SV=2	1	44	44	44	44	44	44	77.3	77.3	77.3	61.054	573	573	0	323.31	77.3	806960000	806960000	140				59	23;135;136;163;164;253;254;266;359;455;634;635;709;793;794;803;1009;1024;1025;1026;1047;1118;1142;1385;1432;1529;1719;1755;1758;1841;1955;1956;2056;2061;2062;2124;2218;2219;2221;2222;2223;2226;2227;2343	True;True;True;True;True;True;True;True;True;True;True;True;True;True;True;True;True;True;True;True;True;True;True;True;True;True;True;True;True;True;True;True;True;True;True;True;True;True;True;True;True;True;True;True	23;138;139;140;141;168;169;260;261;273;370;371;470;656;657;734;820;821;830;1043;1044;1061;1062;1063;1084;1156;1180;1431;1478;1584;1787;1824;1827;1916;2030;2031;2134;2139;2140;2141;2205;2304;2305;2307;2308;2309;2312;2313;2432	25;26;153;154;155;156;157;158;159;160;161;162;163;191;192;193;294;295;307;415;416;528;739;740;828;925;926;927;936;1170;1171;1172;1192;1193;1194;1215;1291;1292;1317;1596;1698;1699;1813;2053;2093;2096;2192;2320;2321;2322;2323;2437;2442;2443;2444;2519;2813;2814;2815;2817;2818;2819;2820;2821;2822;2825;2826;2962	38;39;40;41;42;43;244;245;246;247;248;249;250;251;252;253;254;255;256;257;258;259;260;261;262;263;264;265;266;267;268;269;270;271;272;273;274;275;276;277;278;322;323;324;325;326;491;492;493;494;518;519;675;676;677;843;1186;1187;1314;1454;1455;1456;1457;1458;1459;1473;1474;1842;1843;1844;1845;1846;1878;1879;1880;1881;1882;1908;2020;2021;2054;2055;2461;2462;2669;2670;2671;2672;2673;2674;2849;2850;3…	40;275;278;323;326;492;494;519;675;843;1186;1187;1314;1455;1459;1474;1843;1879;1881;1882;1908;2021;2055;2462;2673;2850;3229;3284;3290;3452;3662;3671;3856;3866;3867;3995;4497;4500;4503;4505;4509;4516;4517;4729	35;36;37;38;39;40	40;55;217;316;477;513
sp|P11021|BIP_HUMAN	sp|P11021|BIP_HUMAN	34	34	33	>sp|P11021|BIP_HUMAN Endoplasmic reticulum chaperone BiP OS=Homo sapiens OX=9606 GN=HSPA5 PE=1 SV=2	1	34	34	33	34	34	33	54.7	54.7	54.7	72.332	654	654	0	323.31	54.7	229640000	229640000	58				60	115;145;223;295;362;502;930;936;969;971;1029;1052;1055;1122;1155;1159;1166;1176;1451;1490;1491;1519;1543;1555;1609;1610;1805;1896;1995;2048;2137;2282;2283;2348	True;True;True;True;True;True;True;True;True;True;True;True;True;True;True;True;True;True;True;True;True;True;True;True;True;True;True;True;True;True;True;True;True;True	116;117;150;229;303;304;374;517;959;965;998;1000;1066;1089;1092;1160;1193;1197;1204;1214;1498;1542;1543;1573;1598;1610;1667;1668;1876;1971;2070;2125;2219;2370;2371;2437	128;129;172;261;337;338;419;580;1076;1082;1118;1120;1197;1220;1223;1296;1297;1331;1335;1342;1353;1719;1764;1765;1766;1800;1827;1839;1911;1912;1913;2147;2253;2365;2427;2428;2535;2894;2895;2967	207;208;209;210;288;436;437;438;572;573;574;681;682;928;1688;1689;1699;1749;1750;1751;1754;1755;1887;1914;1915;1918;2027;2028;2069;2074;2082;2096;2706;2707;2708;2709;2778;2779;2780;2831;2871;2893;3008;3009;3010;3011;3369;3553;3554;3743;3744;3841;3842;3843;4025;4026;4617;4618;4738	209;288;437;573;682;928;1689;1699;1750;1755;1887;1915;1918;2028;2069;2074;2082;2096;2707;2778;2780;2831;2871;2893;3009;3011;3369;3554;3743;3841;4025;4617;4618;4738	41;42	196;332
sp|P11047|LAMC1_HUMAN	sp|P11047|LAMC1_HUMAN	6	6	6	>sp|P11047|LAMC1_HUMAN Laminin subunit gamma-1 OS=Homo sapiens OX=9606 GN=LAMC1 PE=1 SV=3	1	6	6	6	6	6	6	6.2	6.2	6.2	177.6	1609	1609	0	50.765	6.2	12246000	12246000	6				61	416;858;1184;1269;1625;2018	True;True;True;True;True;True	430;885;1222;1311;1685;2094	484;998;1361;1461;1933;2393	780;1565;2104;2255;3042;3780	780;1565;2104;2255;3042;3780
sp|P11142|HSP7C_HUMAN;sp|P54652|HSP72_HUMAN	sp|P11142|HSP7C_HUMAN	27;9	26;8	23;5	>sp|P11142|HSP7C_HUMAN Heat shock cognate 71 kDa protein OS=Homo sapiens OX=9606 GN=HSPA8 PE=1 SV=1	2	27	26	23	27	26	23	50.8	50.8	46.7	70.897	646	646;639	0	297.71	50.8	219900000	219900000	57				62	190;294;552;558;748;781;893;969;970;1223;1325;1326;1457;1488;1520;1521;1612;1614;1729;1749;1819;1897;1916;2115;2135;2172;2327	True;True;True;True;True;True;True;False;True;True;True;True;True;True;True;True;True;True;True;True;True;True;True;True;True;True;True	195;302;571;577;774;808;922;998;999;1262;1368;1369;1504;1540;1574;1575;1670;1671;1673;1674;1797;1818;1890;1891;1972;1991;2196;2217;2256;2416	223;336;639;646;876;910;1037;1118;1119;1404;1523;1524;1725;1761;1762;1801;1802;1803;1915;1916;1917;1920;1921;2064;2086;2087;2161;2162;2254;2275;2508;2531;2532;2760;2944	376;571;1027;1028;1038;1382;1383;1434;1626;1749;1750;1751;1752;1753;2169;2356;2357;2719;2720;2721;2774;2775;2776;2832;2833;2834;2835;2836;3015;3016;3017;3018;3019;3022;3023;3024;3243;3244;3245;3275;3276;3277;3387;3388;3389;3390;3555;3582;3583;3979;3980;4017;4018;4019;4020;4021;4417;4418;4419;4694	376;571;1027;1038;1383;1434;1626;1750;1752;2169;2356;2357;2719;2774;2835;2836;3016;3024;3245;3276;3390;3555;3583;3980;4018;4418;4694	43;44;45	61;122;549
sp|P11166|GTR1_HUMAN	sp|P11166|GTR1_HUMAN	4	4	4	>sp|P11166|GTR1_HUMAN Solute carrier family 2, facilitated glucose transporter member 1 OS=Homo sapiens OX=9606 GN=SLC2A1 PE=1 SV=2	1	4	4	4	4	4	4	7.5	7.5	7.5	54.083	492	492	0	30.979	7.5	10059000	10059000	4				63	776;1380;1996;2349	True;True;True;True	803;1426;2071;2438	905;1590;2366;2968	1427;2452;3745;4739	1427;2452;3745;4739
sp|P11169|GTR3_HUMAN;sp|Q8TDB8|GTR14_HUMAN	sp|P11169|GTR3_HUMAN;sp|Q8TDB8|GTR14_HUMAN	12;6	12;6	12;6	>sp|P11169|GTR3_HUMAN Solute carrier family 2, facilitated glucose transporter member 3 OS=Homo sapiens OX=9606 GN=SLC2A3 PE=1 SV=1;>sp|Q8TDB8|GTR14_HUMAN Solute carrier family 2, facilitated glucose transporter member 14 OS=Homo sapiens OX=9606 GN=SLC2A14	2	12	12	12	12	12	12	17.9	17.9	17.9	53.924	496	496;520	0	135.05	17.9	149400000	149400000	36				64	67;333;334;588;765;1095;1446;1447;1736;1827;1828;1997	True;True;True;True;True;True;True;True;True;True;True;True	67;342;343;344;608;791;1133;1492;1493;1494;1804;1805;1900;1901;1902;2072	76;383;384;385;679;893;1267;1713;1714;1715;2071;2072;2172;2173;2174;2175;2176;2177;2367	128;129;130;634;635;636;637;638;639;1087;1088;1409;1988;2695;2696;2697;2698;2699;2700;2701;3254;3255;3256;3413;3414;3415;3416;3417;3418;3419;3420;3421;3422;3423;3424;3425;3426;3427;3746	129;634;639;1087;1409;1988;2695;2701;3254;3413;3424;3746	46;47;48	242;481;483
sp|P11177|ODPB_HUMAN	sp|P11177|ODPB_HUMAN	8	8	8	>sp|P11177|ODPB_HUMAN Pyruvate dehydrogenase E1 component subunit beta, mitochondrial OS=Homo sapiens OX=9606 GN=PDHB PE=1 SV=3	1	8	8	8	8	8	8	30.4	30.4	30.4	39.233	359	359	0	54.035	30.4	9064600	9064600	10				65	448;988;1005;2041;2142;2207;2346;2374	True;True;True;True;True;True;True;True	463;1020;1039;2118;2225;2293;2435;2463	520;1146;1166;2419;2541;2802;2965;2997	833;834;1803;1804;1834;3828;4035;4483;4735;4785	833;1803;1834;3828;4035;4483;4735;4785
sp|P11940|PABP1_HUMAN;sp|Q9H361|PABP3_HUMAN;sp|Q13310|PABP4_HUMAN;sp|Q4VXU2|PAP1L_HUMAN	sp|P11940|PABP1_HUMAN	5;2;2;1	5;2;2;1	5;2;2;1	>sp|P11940|PABP1_HUMAN Polyadenylate-binding protein 1 OS=Homo sapiens OX=9606 GN=PABPC1 PE=1 SV=2	4	5	5	5	5	5	5	9.3	9.3	9.3	70.67	636	636;631;644;614	0	47.807	9.3	8447900	8447900	6				66	234;569;802;1655;1863	True;True;True;True;True	241;588;829;1716;1938	274;657;935;1971;2219	459;1053;1472;3100;3500;3501	459;1053;1472;3100;3500
sp|P12277|KCRB_HUMAN	sp|P12277|KCRB_HUMAN	8	8	8	>sp|P12277|KCRB_HUMAN Creatine kinase B-type OS=Homo sapiens OX=9606 GN=CKB PE=1 SV=1	1	8	8	8	8	8	8	35.4	35.4	35.4	42.644	381	381	0	68.93	35.4	16560000	16560000	13				67	549;778;829;1213;1239;1260;1318;2297	True;True;True;True;True;True;True;True	568;805;856;1252;1280;1302;1361;2385	635;907;966;1393;1423;1451;1452;1515;2911	1020;1429;1430;1522;2154;2197;2198;2199;2242;2243;2244;2341;4643;4644	1020;1430;1522;2154;2199;2243;2341;4644
sp|P12429|ANXA3_HUMAN	sp|P12429|ANXA3_HUMAN	11	11	11	>sp|P12429|ANXA3_HUMAN Annexin A3 OS=Homo sapiens OX=9606 GN=ANXA3 PE=1 SV=3	1	11	11	11	11	11	11	35.9	35.9	35.9	36.375	323	323	0	71.981	35.9	20904000	20904000	13				68	133;342;394;630;708;786;895;1663;1745;1859;1860	True;True;True;True;True;True;True;True;True;True;True	136;352;407;652;733;813;924;1725;1814;1934;1935	151;393;456;734;827;918;1039;1981;2081;2215;2216	241;242;648;739;740;1175;1313;1443;1628;3115;3270;3494;3495	242;648;739;1175;1313;1443;1628;3115;3270;3494;3495
sp|P12814|ACTN1_HUMAN;sp|P35609|ACTN2_HUMAN;sp|Q08043|ACTN3_HUMAN	sp|P12814|ACTN1_HUMAN	16;6;4	7;1;0	7;1;0	>sp|P12814|ACTN1_HUMAN Alpha-actinin-1 OS=Homo sapiens OX=9606 GN=ACTN1 PE=1 SV=2	3	16	7	7	16	7	7	22.4	10.3	10.3	103.06	892	892;894;901	0	43.068	22.4	10566000	10566000	6				69	121;197;277;480;542;718;870;883;923;1109;1196;1338;1395;1437;1747;2039	False;False;False;False;False;True;True;False;True;False;True;False;True;True;True;False	124;202;285;495;561;743;898;912;952;1147;1234;1383;1441;1483;1816;2116	137;230;319;556;628;838;1012;1026;1069;1281;1373;1543;1606;1704;2083;2417	219;387;549;886;887;1011;1012;1329;1587;1610;1611;1612;1677;2007;2008;2121;2384;2476;2682;3272;3823;3824	219;387;549;886;1011;1329;1587;1611;1677;2008;2121;2384;2476;2682;3272;3824
sp|P12956|XRCC6_HUMAN	sp|P12956|XRCC6_HUMAN	8	8	8	>sp|P12956|XRCC6_HUMAN X-ray repair cross-complementing protein 6 OS=Homo sapiens OX=9606 GN=XRCC6 PE=1 SV=2	1	8	8	8	8	8	8	19.4	19.4	19.4	69.842	609	609	0	57.217	19.4	6784600	6784600	10				70	382;553;1139;1149;1563;1571;1690;2001	True;True;True;True;True;True;True;True	394;572;1177;1187;1618;1626;1757;2076	442;640;1314;1325;1848;1860;2017;2018;2372	723;1029;2051;2063;2906;2927;2928;3169;3170;3751	723;1029;2051;2063;2906;2928;3169;3751
sp|P13010|XRCC5_HUMAN	sp|P13010|XRCC5_HUMAN	4	4	4	>sp|P13010|XRCC5_HUMAN X-ray repair cross-complementing protein 5 OS=Homo sapiens OX=9606 GN=XRCC5 PE=1 SV=3	1	4	4	4	4	4	4	12.2	12.2	12.2	82.704	732	732	0	25.611	12.2	6933900	6933900	10				71	428;1121;1990;2402	True;True;True;True	442;1159;2065;2492	497;1295;2360;3030;3031	797;2025;2026;3736;3737;3738;4843;4844;4845;4846	797;2025;3738;4844
sp|P13639|EF2_HUMAN;sp|Q15029|U5S1_HUMAN	sp|P13639|EF2_HUMAN	22;1	22;1	22;1	>sp|P13639|EF2_HUMAN Elongation factor 2 OS=Homo sapiens OX=9606 GN=EEF2 PE=1 SV=4	2	22	22	22	22	22	22	33.8	33.8	33.8	95.337	858	858;972	0	193.26	33.8	59527000	59527000	46				72	191;241;256;270;436;440;512;607;657;691;751;1094;1335;1591;1646;1917;1918;1926;2303;2389;2454;2466	True;True;True;True;True;True;True;True;True;True;True;True;True;True;True;True;True;True;True;True;True;True	196;248;263;277;450;451;455;529;628;679;714;777;1132;1379;1649;1706;1992;1993;2001;2392;2478;2544;2556	224;281;297;311;505;506;507;511;594;707;762;802;879;1266;1538;1892;1957;2276;2277;2278;2286;2918;3013;3014;3087;3099	377;467;468;496;497;525;526;808;809;810;811;817;818;819;820;821;950;951;952;1138;1218;1278;1386;1985;1986;1987;2376;2377;2378;2977;3076;3584;3585;3586;3587;3588;3597;3598;4654;4809;4810;4811;4812;4813;4937;4938;4957	377;468;496;526;810;819;952;1138;1218;1278;1386;1987;2378;2977;3076;3586;3588;3597;4654;4812;4938;4957	49	697
sp|P13667|PDIA4_HUMAN	sp|P13667|PDIA4_HUMAN	21	21	21	>sp|P13667|PDIA4_HUMAN Protein disulfide-isomerase A4 OS=Homo sapiens OX=9606 GN=PDIA4 PE=1 SV=2	1	21	21	21	21	21	21	42.9	42.9	42.9	72.932	645	645	0	174.73	42.9	55650000	55650000	25				73	353;529;543;574;576;758;905;915;1468;1596;1699;1750;1839;2093;2173;2287;2328;2339;2397;2422;2423	True;True;True;True;True;True;True;True;True;True;True;True;True;True;True;True;True;True;True;True;True	363;548;562;594;596;784;934;944;1515;1516;1654;1766;1819;1914;2173;2257;2375;2417;2428;2486;2512;2513	407;614;629;664;666;886;1049;1061;1736;1737;1897;2029;2088;2190;2480;2761;2899;2945;2958;3023;3053;3054	665;986;1013;1063;1066;1396;1640;1658;1659;2738;2739;2982;3190;3278;3450;3935;3936;4420;4624;4695;4720;4721;4832;4876;4877;4878	665;986;1013;1063;1066;1396;1640;1658;2739;2982;3190;3278;3450;3936;4420;4624;4695;4720;4832;4876;4877	50	583
sp|P13796|PLSL_HUMAN	sp|P13796|PLSL_HUMAN	5	5	5	>sp|P13796|PLSL_HUMAN Plastin-2 OS=Homo sapiens OX=9606 GN=LCP1 PE=1 SV=6	1	5	5	5	5	5	5	12.1	12.1	12.1	70.288	627	627	0	35.064	12.1	5201100	5201100	8				74	49;888;1348;1675;2305	True;True;True;True;True	49;917;1393;1741;2394	57;1032;1555;2001;2920	89;1621;2405;3145;4656;4657;4658;4659	89;1621;2405;3145;4657
sp|P13804|ETFA_HUMAN	sp|P13804|ETFA_HUMAN	8	8	8	>sp|P13804|ETFA_HUMAN Electron transfer flavoprotein subunit alpha, mitochondrial OS=Homo sapiens OX=9606 GN=ETFA PE=1 SV=1	1	8	8	8	8	8	8	40.5	40.5	40.5	35.079	333	333	0	75.7	40.5	14805000	14805000	16				75	22;783;1241;1261;1333;1674;2044;2046	True;True;True;True;True;True;True;True	22;810;1282;1303;1377;1740;2121;2123	24;912;913;914;915;1425;1453;1535;1536;2000;2422;2424	36;37;1436;1437;1438;1439;2201;2245;2246;2372;2373;2374;3144;3834;3835;3836;3838	36;1437;2201;2245;2372;3144;3836;3838
sp|P14314|GLU2B_HUMAN	sp|P14314|GLU2B_HUMAN	12	12	12	>sp|P14314|GLU2B_HUMAN Glucosidase 2 subunit beta OS=Homo sapiens OX=9606 GN=PRKCSH PE=1 SV=2	1	12	12	12	12	12	12	34.1	34.1	34.1	59.425	528	528	0	97.184	34.1	46153000	46153000	22				76	184;258;498;509;795;1262;1263;1445;1565;1858;1865;2414	True;True;True;True;True;True;True;True;True;True;True;True	189;265;513;526;822;1304;1305;1491;1620;1933;1940;2504	217;299;576;591;928;1454;1455;1712;1851;2214;2221;3045	368;501;502;503;504;921;922;923;945;946;1460;1461;2247;2248;2693;2694;2909;3493;3503;3504;4864;4865	368;502;923;946;1461;2247;2248;2694;2909;3493;3504;4865
sp|P14618|KPYM_HUMAN;sp|P30613|KPYR_HUMAN	sp|P14618|KPYM_HUMAN	20;1	20;1	20;1	>sp|P14618|KPYM_HUMAN Pyruvate kinase PKM OS=Homo sapiens OX=9606 GN=PKM PE=1 SV=4	2	20	20	20	20	20	20	57.8	57.8	57.8	57.936	531	531;574	0	197.91	57.8	67990000	67990000	34				77	54;87;249;404;571;572;625;644;707;770;933;1053;1101;1106;1204;1222;1346;1623;1963;2302	True;True;True;True;True;True;True;True;True;True;True;True;True;True;True;True;True;True;True;True	54;88;256;418;590;591;592;647;666;732;797;962;1090;1139;1144;1242;1261;1391;1683;2038;2391	62;97;289;471;659;660;661;662;729;749;826;899;1079;1221;1273;1278;1382;1403;1552;1553;1930;2330;2917	97;163;479;480;758;759;1056;1057;1058;1059;1060;1061;1166;1167;1201;1312;1417;1418;1696;1916;1996;2001;2002;2003;2136;2137;2168;2400;2401;2402;3039;3686;3687;3688;4653	97;163;480;758;1058;1061;1167;1201;1312;1418;1696;1916;1996;2003;2136;2168;2402;3039;3687;4653	51	239
sp|P14625|ENPL_HUMAN;sp|Q58FF3|ENPLL_HUMAN	sp|P14625|ENPL_HUMAN	38;4	38;4	37;4	>sp|P14625|ENPL_HUMAN Endoplasmin OS=Homo sapiens OX=9606 GN=HSP90B1 PE=1 SV=1	2	38	38	37	38	38	37	49.8	49.8	48.3	92.468	803	803;399	0	323.31	49.8	282930000	282930000	67				78	174;175;343;405;419;434;446;450;475;518;599;724;796;801;897;980;1074;1107;1108;1113;1163;1185;1280;1289;1294;1406;1578;1579;1666;1780;1834;1836;1975;1976;1992;1993;2136;2206	True;True;True;True;True;True;True;True;True;True;True;True;True;True;True;True;True;True;True;True;True;True;True;True;True;True;True;True;True;True;True;True;True;True;True;True;True;True	179;180;353;419;433;448;461;465;490;537;619;750;823;828;926;1011;1111;1145;1146;1151;1201;1223;1322;1331;1336;1452;1633;1634;1728;1850;1851;1909;1911;2050;2051;2067;2068;2218;2292	204;205;394;472;487;488;503;518;522;523;549;603;691;692;846;929;934;1041;1135;1136;1245;1279;1280;1286;1339;1362;1472;1481;1486;1670;1671;1867;1868;1869;1870;1984;2119;2120;2184;2186;2344;2345;2362;2363;2533;2534;2801	338;339;649;650;760;783;784;806;829;830;836;837;877;878;970;1105;1106;1107;1341;1462;1463;1469;1470;1471;1630;1786;1787;1788;1789;1790;1959;2004;2005;2006;2014;2078;2105;2106;2268;2269;2282;2289;2290;2291;2627;2628;2629;2630;2935;2936;2937;2938;2939;3119;3329;3330;3440;3441;3443;3711;3712;3713;3740;3741;4022;4023;4024;4481;4482	338;339;650;760;783;806;830;836;878;970;1106;1341;1463;1469;1630;1788;1959;2005;2006;2014;2078;2106;2269;2282;2290;2627;2935;2938;3119;3329;3440;3443;3711;3712;3740;3741;4022;4482	52	425
sp|P63162|RSMN_HUMAN;sp|P14678|RSMB_HUMAN	sp|P63162|RSMN_HUMAN;sp|P14678|RSMB_HUMAN	4;4	4;4	4;4	>sp|P63162|RSMN_HUMAN Small nuclear ribonucleoprotein-associated protein N OS=Homo sapiens OX=9606 GN=SNRPN PE=1 SV=1;>sp|P14678|RSMB_HUMAN Small nuclear ribonucleoprotein-associated proteins B and B OS=Homo sapiens OX=9606 GN=SNRPB PE=1 SV=2	2	4	4	4	4	4	4	18.3	18.3	18.3	24.614	240	240;240	0	28.834	18.3	4161500	4161500	4				79	661;854;1782;2288	True;True;True;True	683;881;1853;2376	766;994;2122;2900	1222;1223;1560;3332;4625;4626	1222;1560;3332;4626
sp|P14866|HNRPL_HUMAN	sp|P14866|HNRPL_HUMAN	4	4	4	>sp|P14866|HNRPL_HUMAN Heterogeneous nuclear ribonucleoprotein L OS=Homo sapiens OX=9606 GN=HNRNPL PE=1 SV=2	1	4	4	4	4	4	4	10	10	10	64.132	589	589	0	27.102	10	6200300	6200300	4				80	1217;1352;1538;1855	True;True;True;True	1256;1397;1593;1930	1397;1559;1822;2209	2160;2410;2864;3485	2160;2410;2864;3485
sp|P14923|PLAK_HUMAN	sp|P14923|PLAK_HUMAN	6	6	6	>sp|P14923|PLAK_HUMAN Junction plakoglobin OS=Homo sapiens OX=9606 GN=JUP PE=1 SV=3	1	6	6	6	6	6	6	11.8	11.8	11.8	81.744	745	745	0	39.776	11.8	5439400	5439400	9				81	713;884;1323;1350;2072;2074	True;True;True;True;True;True	738;913;1366;1395;2151;2153;2154	832;1027;1521;1557;2456;2458;2459	1322;1613;2353;2354;2408;3892;3895;3896;3897	1322;1613;2353;2408;3892;3897	53	193
sp|P15924|DESP_HUMAN	sp|P15924|DESP_HUMAN	10	10	10	>sp|P15924|DESP_HUMAN Desmoplakin OS=Homo sapiens OX=9606 GN=DSP PE=1 SV=3	1	10	10	10	10	10	10	4.2	4.2	4.2	331.77	2871	2871	0	56.655	4.2	5759600	5759600	9				82	158;185;935;1030;1313;1328;1704;1707;1924;2419	True;True;True;True;True;True;True;True;True;True	163;190;964;1067;1355;1371;1771;1774;1999;2509	185;218;1081;1198;1507;1526;2034;2037;2284;3050	310;369;1698;1888;2329;2359;3197;3201;3595;4870	310;369;1698;1888;2329;2359;3197;3201;3595;4870
sp|P16422|EPCAM_HUMAN	sp|P16422|EPCAM_HUMAN	10	10	10	>sp|P16422|EPCAM_HUMAN Epithelial cell adhesion molecule OS=Homo sapiens OX=9606 GN=EPCAM PE=1 SV=2	1	10	10	10	10	10	10	29.9	29.9	29.9	34.932	314	314	0	68.24	29.9	15693000	15693000	12				83	117;385;663;1214;1662;1740;1778;1983;2095;2096	True;True;True;True;True;True;True;True;True;True	119;398;685;1253;1724;1809;1848;2058;2175;2176	131;447;768;1394;1980;2076;2117;2352;2353;2482;2483	212;729;1225;2155;3114;3264;3326;3327;3724;3725;3938;3939;3940	212;729;1225;2155;3114;3264;3326;3725;3939;3940
sp|P16435|NCPR_HUMAN	sp|P16435|NCPR_HUMAN	7	7	7	>sp|P16435|NCPR_HUMAN NADPH--cytochrome P450 reductase OS=Homo sapiens OX=9606 GN=POR PE=1 SV=2	1	7	7	7	7	7	7	13.4	13.4	13.4	76.689	677	677	0	47.596	13.4	10436000	10436000	6				84	523;787;1240;1605;1776;1945;2415	True;True;True;True;True;True;True	542;814;1281;1663;1846;2020;2505	608;919;1424;1906;2115;2308;3046	977;1444;2200;3000;3323;3647;4866	977;1444;2200;3000;3323;3647;4866
sp|P16615|AT2A2_HUMAN;sp|O14983|AT2A1_HUMAN	sp|P16615|AT2A2_HUMAN	4;1	4;1	4;1	>sp|P16615|AT2A2_HUMAN Sarcoplasmic/endoplasmic reticulum calcium ATPase 2 OS=Homo sapiens OX=9606 GN=ATP2A2 PE=1 SV=1	2	4	4	4	4	4	4	4.6	4.6	4.6	114.76	1042	1042;1001	0	23.833	4.6	2775800	2775800	4				85	152;433;953;2190	True;True;True;True	157;447;982;2275	179;502;1099;2781	302;805;1723;4445	302;805;1723;4445
sp|P17987|TCPA_HUMAN	sp|P17987|TCPA_HUMAN	6	6	6	>sp|P17987|TCPA_HUMAN T-complex protein 1 subunit alpha OS=Homo sapiens OX=9606 GN=TCP1 PE=1 SV=1	1	6	6	6	6	6	6	15.5	15.5	15.5	60.343	556	556	0	41.071	15.5	4048600	4048600	6				86	70;310;1899;1912;2276;2384	True;True;True;True;True;True	70;319;1974;1987;2364;2473	79;354;2256;2271;2887;3008	134;596;3557;3577;4602;4803	134;596;3557;3577;4602;4803
sp|P18124|RL7_HUMAN	sp|P18124|RL7_HUMAN	6	6	6	>sp|P18124|RL7_HUMAN 60S ribosomal protein L7 OS=Homo sapiens OX=9606 GN=RPL7 PE=1 SV=1	1	6	6	6	6	6	6	29.8	29.8	29.8	29.225	248	248	0	38.784	29.8	17927000	17927000	14				87	92;904;1063;1167;2112;2421	True;True;True;True;True;True	93;933;1100;1205;2193;2511	102;1048;1234;1343;2504;2505;3052	169;1639;1939;1940;2083;3971;3972;3973;3974;3975;4872;4873;4874;4875	169;1639;1939;2083;3975;4874
sp|P18206|VINC_HUMAN	sp|P18206|VINC_HUMAN	7	7	7	>sp|P18206|VINC_HUMAN Vinculin OS=Homo sapiens OX=9606 GN=VCL PE=1 SV=4	1	7	7	7	7	7	7	9.3	9.3	9.3	123.8	1134	1134	0	45.446	9.3	6271800	6271800	14				88	110;186;368;759;1310;1731;1932	True;True;True;True;True;True;True	111;191;380;785;1352;1799;2007	122;123;219;426;887;1503;2066;2292	196;197;198;199;370;695;696;1397;2320;2321;2322;3247;3248;3609;3610	197;370;696;1397;2320;3248;3610
sp|P18669|PGAM1_HUMAN;sp|P15259|PGAM2_HUMAN;sp|Q8N0Y7|PGAM4_HUMAN	sp|P18669|PGAM1_HUMAN;sp|P15259|PGAM2_HUMAN	6;4;2	6;4;2	6;4;2	>sp|P18669|PGAM1_HUMAN Phosphoglycerate mutase 1 OS=Homo sapiens OX=9606 GN=PGAM1 PE=1 SV=2;>sp|P15259|PGAM2_HUMAN Phosphoglycerate mutase 2 OS=Homo sapiens OX=9606 GN=PGAM2 PE=1 SV=3	3	6	6	6	6	6	6	29.1	29.1	29.1	28.804	254	254;253;254	0	43.984	29.1	11958000	11958000	11				89	140;150;603;894;1085;2396	True;True;True;True;True;True	145;155;624;923;1122;2485	167;177;697;1038;1256;3022	282;283;299;1118;1119;1627;1971;4828;4829;4830;4831	283;299;1118;1627;1971;4828
sp|P19338|NUCL_HUMAN	sp|P19338|NUCL_HUMAN	18	18	18	>sp|P19338|NUCL_HUMAN Nucleolin OS=Homo sapiens OX=9606 GN=NCL PE=1 SV=3	1	18	18	18	18	18	18	35.4	35.4	35.4	76.613	710	710	0	174	35.4	62112000	62112000	32				90	146;412;413;520;573;671;733;799;1069;1178;1461;1582;1684;1695;1847;2013;2014;2071	True;True;True;True;True;True;True;True;True;True;True;True;True;True;True;True;True;True	151;426;427;539;593;693;759;826;1106;1216;1508;1637;1750;1762;1922;2089;2090;2150	173;480;481;605;663;776;856;932;1240;1355;1729;1873;2010;2025;2198;2388;2389;2454;2455	289;774;775;972;973;1062;1237;1238;1354;1355;1467;1951;2098;2726;2727;2942;2943;3158;3159;3182;3183;3466;3467;3771;3772;3773;3774;3886;3887;3888;3889;3890;3891	289;774;775;972;1062;1238;1355;1467;1951;2098;2726;2942;3159;3182;3467;3772;3774;3887
sp|P20073|ANXA7_HUMAN	sp|P20073|ANXA7_HUMAN	8	8	8	>sp|P20073|ANXA7_HUMAN Annexin A7 OS=Homo sapiens OX=9606 GN=ANXA7 PE=1 SV=3	1	8	8	8	8	8	8	19.3	19.3	19.3	52.739	488	488	0	59.176	19.3	5902200	5902200	13				91	212;318;628;675;1276;1330;1456;1641	True;True;True;True;True;True;True;True	217;327;650;697;1318;1374;1503;1701	247;363;732;781;1468;1531;1724;1949;1950;1951	417;608;609;610;611;1171;1244;2264;2365;2718;3067;3068;3069	417;608;1171;1244;2264;2365;2718;3068
sp|P20290|BTF3_HUMAN	sp|P20290|BTF3_HUMAN	4	4	4	>sp|P20290|BTF3_HUMAN Transcription factor BTF3 OS=Homo sapiens OX=9606 GN=BTF3 PE=1 SV=1	1	4	4	4	4	4	4	47.6	47.6	47.6	22.168	206	206	0	37.424	47.6	6778200	6778200	6				92	168;1281;1705;2321	True;True;True;True	173;1323;1772;2410	198;1473;2035;2938	331;2270;3198;3199;4685;4686	331;2270;3199;4686
sp|P20645|MPRD_HUMAN	sp|P20645|MPRD_HUMAN	4	4	4	>sp|P20645|MPRD_HUMAN Cation-dependent mannose-6-phosphate receptor OS=Homo sapiens OX=9606 GN=M6PR PE=1 SV=1	1	4	4	4	4	4	4	19.5	19.5	19.5	30.993	277	277	0	26.659	19.5	5641900	5641900	5				93	496;686;880;1815	True;True;True;True	511;709;909;1886	574;794;1023;2157	918;919;1261;1604;3382	918;1261;1604;3382
sp|P21333|FLNA_HUMAN	sp|P21333|FLNA_HUMAN	33	32	31	>sp|P21333|FLNA_HUMAN Filamin-A OS=Homo sapiens OX=9606 GN=FLNA PE=1 SV=4	1	33	32	31	33	32	31	20.3	20	19.5	280.74	2647	2647	0	244.21	20.3	38782000	38782000	45				94	69;96;155;206;238;282;418;540;629;784;926;1065;1165;1317;1378;1415;1438;1553;1788;1893;2023;2024;2025;2082;2158;2230;2310;2313;2342;2357;2358;2400;2446	True;True;True;True;True;True;True;True;True;True;True;True;True;False;True;True;True;True;True;True;True;True;True;True;True;True;True;True;True;True;True;True;True	69;97;160;211;245;290;432;559;651;811;955;1102;1203;1360;1424;1461;1484;1608;1859;1968;2099;2100;2101;2162;2242;2316;2399;2402;2431;2446;2447;2490;2536	78;106;182;241;278;324;486;626;733;916;1072;1236;1341;1514;1588;1681;1705;1837;2129;2250;2398;2399;2400;2469;2558;2829;2926;2929;2961;2976;2977;3028;3079	132;133;174;306;406;463;555;556;782;1008;1172;1173;1174;1440;1681;1942;1943;2081;2340;2450;2644;2683;2684;2890;2891;3340;3341;3548;3785;3786;3787;3788;3789;3915;4057;4520;4666;4669;4725;4726;4727;4728;4752;4753;4840;4924	132;174;306;406;463;556;782;1008;1172;1440;1681;1943;2081;2340;2450;2644;2683;2890;3341;3548;3785;3786;3788;3915;4057;4520;4666;4669;4727;4752;4753;4840;4924
sp|P21796|VDAC1_HUMAN	sp|P21796|VDAC1_HUMAN	5	5	5	>sp|P21796|VDAC1_HUMAN Voltage-dependent anion-selective channel protein 1 OS=Homo sapiens OX=9606 GN=VDAC1 PE=1 SV=2	1	5	5	5	5	5	5	28.6	28.6	28.6	30.772	283	283	0	35.746	28.6	5891700	5891700	5				95	1407;1978;2049;2356;2451	True;True;True;True;True	1453;2053;2126;2445;2541	1672;2347;2429;2975;3084	2631;3717;3844;4751;4933	2631;3717;3844;4751;4933
sp|P22314|UBA1_HUMAN	sp|P22314|UBA1_HUMAN	6	6	6	>sp|P22314|UBA1_HUMAN Ubiquitin-like modifier-activating enzyme 1 OS=Homo sapiens OX=9606 GN=UBA1 PE=1 SV=3	1	6	6	6	6	6	6	9.8	9.8	9.8	117.85	1058	1058	0	43.951	9.8	3668600	3668600	6				96	139;1194;1216;1229;1542;1873	True;True;True;True;True;True	144;1232;1255;1268;1597;1948	166;1371;1396;1410;1826;2230	281;2117;2157;2158;2159;2178;2870;3516	281;2117;2158;2178;2870;3516
sp|P22392|NDKB_HUMAN;sp|O60361|NDK8_HUMAN	sp|P22392|NDKB_HUMAN;sp|O60361|NDK8_HUMAN	5;3	5;3	2;2	>sp|P22392|NDKB_HUMAN Nucleoside diphosphate kinase B OS=Homo sapiens OX=9606 GN=NME2 PE=1 SV=1;>sp|O60361|NDK8_HUMAN Putative nucleoside diphosphate kinase OS=Homo sapiens OX=9606 GN=NME2P1 PE=5 SV=1	2	5	5	2	5	5	2	43.4	43.4	19.1	17.298	152	152;137	0	48.264	43.4	36435000	36435000	18				97	737;1559;2000;2300;2445	True;True;True;True;True	763;1614;2075;2388;2389;2535	865;1844;2370;2371;2914;2915;3077;3078	1366;1367;2901;3749;3750;4647;4648;4649;4650;4915;4916;4917;4918;4919;4920;4921;4922;4923	1366;2901;3749;4650;4916	54	90
sp|P22626|ROA2_HUMAN	sp|P22626|ROA2_HUMAN	9	9	9	>sp|P22626|ROA2_HUMAN Heterogeneous nuclear ribonucleoproteins A2/B1 OS=Homo sapiens OX=9606 GN=HNRNPA2B1 PE=1 SV=2	1	9	9	9	9	9	9	36.8	36.8	36.8	37.429	353	353	0	105.22	36.8	23699000	23699000	16				98	673;689;695;1127;1403;1586;1640;1669;2431	True;True;True;True;True;True;True;True;True	695;712;720;1165;1449;1642;1700;1731;1732;1733;2521	778;798;799;800;812;1302;1667;1879;1880;1948;1987;1988;1989;1990;3062;3063	1241;1274;1275;1276;1292;1293;2037;2622;2623;2952;2953;2954;2955;3066;3124;3125;3126;3127;3128;3129;4890;4891	1241;1276;1293;2037;2623;2954;3066;3127;4890	55	193
sp|P23141|EST1_HUMAN	sp|P23141|EST1_HUMAN	7	7	7	>sp|P23141|EST1_HUMAN Liver carboxylesterase 1 OS=Homo sapiens OX=9606 GN=CES1 PE=1 SV=2	1	7	7	7	7	7	7	17.6	17.6	17.6	62.52	567	567	0	58.253	17.6	6168500	6168500	11				99	437;452;499;747;1086;1668;1959	True;True;True;True;True;True;True	452;467;514;773;1123;1730;2034	508;525;577;875;1257;1986;2326	812;813;839;840;924;1381;1972;3121;3122;3123;3681	813;840;924;1381;1972;3122;3681
sp|P23246|SFPQ_HUMAN	sp|P23246|SFPQ_HUMAN	4	4	4	>sp|P23246|SFPQ_HUMAN Splicing factor, proline- and glutamine-rich OS=Homo sapiens OX=9606 GN=SFPQ PE=1 SV=2	1	4	4	4	4	4	4	9.1	9.1	9.1	76.149	707	707	0	26.572	9.1	3432800	3432800	4				100	544;570;1584;1767	True;True;True;True	563;589;1639;1837	630;658;1875;2106	1014;1054;1055;2946;3306	1014;1055;2946;3306
sp|P23284|PPIB_HUMAN	sp|P23284|PPIB_HUMAN	4	4	4	>sp|P23284|PPIB_HUMAN Peptidyl-prolyl cis-trans isomerase B OS=Homo sapiens OX=9606 GN=PPIB PE=1 SV=2	1	4	4	4	4	4	4	18.1	18.1	18.1	23.742	216	216	0	25.983	18.1	8357700	8357700	4				101	349;948;2246;2284	True;True;True;True	359;977;2332;2372	402;1094;2846;2896	659;1715;4544;4619	659;1715;4544;4619
sp|P23396|RS3_HUMAN	sp|P23396|RS3_HUMAN	8	8	8	>sp|P23396|RS3_HUMAN 40S ribosomal protein S3 OS=Homo sapiens OX=9606 GN=RPS3 PE=1 SV=2	1	8	8	8	8	8	8	33.7	33.7	33.7	26.688	243	243	0	58.856	33.7	17291000	17291000	10				102	317;465;484;613;640;955;1140;1141	True;True;True;True;True;True;True;True	326;480;499;634;662;984;1178;1179	362;539;560;714;745;1101;1315;1316	607;860;861;862;893;1146;1147;1194;1195;1725;2052;2053	607;862;893;1146;1195;1725;2052;2053
sp|P23526|SAHH_HUMAN	sp|P23526|SAHH_HUMAN	11	11	11	>sp|P23526|SAHH_HUMAN Adenosylhomocysteinase OS=Homo sapiens OX=9606 GN=AHCY PE=1 SV=4	1	11	11	11	11	11	11	28.9	28.9	28.9	47.716	432	432	0	82.542	28.9	29684000	29684000	17				103	123;208;329;717;968;1124;1125;1499;2168;2315;2388	True;True;True;True;True;True;True;True;True;True;True	126;213;338;742;997;1162;1163;1551;2252;2404;2477	139;243;376;836;837;1117;1299;1300;1774;2756;2931;3012	222;409;626;1326;1327;1328;1748;2030;2031;2032;2033;2034;2791;4413;4672;4673;4674;4808	222;409;626;1328;1748;2031;2034;2791;4413;4673;4808
sp|P23528|COF1_HUMAN;sp|Q9Y281|COF2_HUMAN	sp|P23528|COF1_HUMAN	4;1	4;1	4;1	>sp|P23528|COF1_HUMAN Cofilin-1 OS=Homo sapiens OX=9606 GN=CFL1 PE=1 SV=3	2	4	4	4	4	4	4	34.9	34.9	34.9	18.502	166	166;166	0	44.09	34.9	13738000	13738000	8				104	818;1408;1560;2399	True;True;True;True	845;1454;1615;2489	952;1673;1845;3027	1498;1499;1500;2632;2633;2902;2903;4839	1500;2633;2903;4839
sp|P23588|IF4B_HUMAN	sp|P23588|IF4B_HUMAN	4	4	4	>sp|P23588|IF4B_HUMAN Eukaryotic translation initiation factor 4B OS=Homo sapiens OX=9606 GN=EIF4B PE=1 SV=2	1	4	4	4	4	4	4	10	10	10	69.15	611	611	0	38.605	10	5553500	5553500	4				105	19;1753;1900;1929	True;True;True;True	19;1822;1975;2004	20;2091;2257;2289	31;3282;3558;3604	31;3282;3558;3604
sp|P24752|THIL_HUMAN	sp|P24752|THIL_HUMAN	14	14	14	>sp|P24752|THIL_HUMAN Acetyl-CoA acetyltransferase, mitochondrial OS=Homo sapiens OX=9606 GN=ACAT1 PE=1 SV=1	1	14	14	14	14	14	14	54.1	54.1	54.1	45.199	427	427	0	164.53	54.1	46304000	46304000	27				106	86;420;489;531;761;960;1060;1275;1495;1544;1659;1681;2088;2307	True;True;True;True;True;True;True;True;True;True;True;True;True;True	87;434;504;550;787;989;1097;1317;1547;1599;1720;1747;2168;2396	96;489;565;617;889;1106;1107;1231;1467;1770;1828;1976;2007;2475;2922	161;162;785;899;900;901;990;1402;1403;1731;1732;1733;1932;1933;1934;1935;2262;2263;2785;2786;2872;2873;3107;3152;3924;3925;4661	162;785;900;990;1402;1731;1935;2263;2786;2873;3107;3152;3924;4661
sp|P25685|DNJB1_HUMAN;sp|Q9UDY4|DNJB4_HUMAN	sp|P25685|DNJB1_HUMAN	6;1	6;1	6;1	>sp|P25685|DNJB1_HUMAN DnaJ homolog subfamily B member 1 OS=Homo sapiens OX=9606 GN=DNAJB1 PE=1 SV=4	2	6	6	6	6	6	6	23.2	23.2	23.2	38.044	340	340;337	0	49.316	23.2	11905000	11905000	10				107	330;411;438;1146;1760;2335	True;True;True;True;True;True	339;425;453;1184;1829;2424	377;378;379;479;509;1322;2098;2954	627;628;629;772;773;814;815;2060;3295;4713	628;772;814;2060;3295;4713
sp|P25705|ATPA_HUMAN	sp|P25705|ATPA_HUMAN	15	15	15	>sp|P25705|ATPA_HUMAN ATP synthase subunit alpha, mitochondrial OS=Homo sapiens OX=9606 GN=ATP5F1A PE=1 SV=1	1	15	15	15	15	15	15	36.9	36.9	36.9	59.75	553	553	0	181.66	36.9	75104000	75104000	24				108	222;515;592;742;811;993;1035;1049;1634;2007;2020;2104;2295;2361;2362	True;True;True;True;True;True;True;True;True;True;True;True;True;True;True	228;533;612;768;838;1025;1072;1086;1694;2083;2096;2184;2383;2450;2451	260;598;599;683;870;945;1151;1203;1217;1942;2381;2395;2492;2909;2980;2981	435;958;959;960;961;962;963;964;1092;1374;1489;1811;1812;1893;1911;3056;3057;3762;3782;3954;4641;4758;4759;4760	435;960;1092;1374;1489;1812;1893;1911;3056;3762;3782;3954;4641;4759;4760
sp|P26373|RL13_HUMAN	sp|P26373|RL13_HUMAN	7	7	7	>sp|P26373|RL13_HUMAN 60S ribosomal protein L13 OS=Homo sapiens OX=9606 GN=RPL13 PE=1 SV=4	1	7	7	7	7	7	7	34.6	34.6	34.6	24.261	211	211	0	51.681	34.6	23951000	23951000	11				109	114;679;1100;1211;1919;2163;2258	True;True;True;True;True;True;True	115;702;1138;1249;1250;1994;2247;2345	127;787;1272;1390;1391;2279;2751;2865	206;1253;1994;1995;2148;2149;2150;3589;3590;4407;4571	206;1253;1994;2150;3590;4407;4571	56	155
sp|P26599|PTBP1_HUMAN;sp|O95758|PTBP3_HUMAN	sp|P26599|PTBP1_HUMAN	8;2	8;2	8;2	>sp|P26599|PTBP1_HUMAN Polypyrimidine tract-binding protein 1 OS=Homo sapiens OX=9606 GN=PTBP1 PE=1 SV=1	2	8	8	8	8	8	8	26	26	26	57.221	531	531;552	0	49.476	26	9380600	9380600	10				110	173;444;762;868;903;1598;2352;2353	True;True;True;True;True;True;True;True	178;459;788;896;932;1656;2441;2442	203;515;890;1010;1047;1899;2971;2972	337;826;1404;1584;1638;2986;2987;4743;4744;4745	337;826;1404;1584;1638;2986;4744;4745
sp|P26641|EF1G_HUMAN	sp|P26641|EF1G_HUMAN	4	4	4	>sp|P26641|EF1G_HUMAN Elongation factor 1-gamma OS=Homo sapiens OX=9606 GN=EEF1G PE=1 SV=3	1	4	4	4	4	4	4	13.5	13.5	13.5	50.118	437	437	0	25.89	13.5	5663100	5663100	5				111	127;1078;1226;1921	True;True;True;True	130;1115;1265;1996	144;1249;1407;2281	233;1963;1964;2175;3592	233;1964;2175;3592
sp|P27487|DPP4_HUMAN	sp|P27487|DPP4_HUMAN	6	6	6	>sp|P27487|DPP4_HUMAN Dipeptidyl peptidase 4 OS=Homo sapiens OX=9606 GN=DPP4 PE=1 SV=2	1	6	6	6	6	6	6	9.9	9.9	9.9	88.278	766	766	0	49.076	9.9	9340900	9340900	7				112	83;279;281;876;1277;2281	True;True;True;True;True;True	84;287;289;904;1319;2369	93;321;323;1018;1469;2893	155;551;553;554;1594;2265;4616	155;551;554;1594;2265;4616
sp|P27797|CALR_HUMAN	sp|P27797|CALR_HUMAN	14	14	14	>sp|P27797|CALR_HUMAN Calreticulin OS=Homo sapiens OX=9606 GN=CALR PE=1 SV=1	1	14	14	14	14	14	14	55.9	55.9	55.9	48.141	417	417	0	127.06	55.9	110580000	110580000	39				113	268;619;621;622;732;821;916;922;979;1136;1246;1689;1803;1833	True;True;True;True;True;True;True;True;True;True;True;True;True;True	275;641;643;644;758;848;945;951;1010;1174;1287;1288;1756;1874;1908	309;721;724;725;726;855;955;956;1062;1068;1133;1134;1311;1430;1431;1432;2016;2145;2183	521;522;523;1156;1157;1160;1161;1162;1353;1504;1505;1506;1660;1670;1671;1672;1673;1674;1675;1676;1781;1782;1783;1784;1785;2047;2048;2208;2209;2210;2211;2212;2213;2214;3168;3367;3437;3438;3439	523;1157;1160;1161;1353;1504;1660;1672;1782;2048;2213;3168;3367;3439	57	131
sp|P27816|MAP4_HUMAN	sp|P27816|MAP4_HUMAN	13	13	13	>sp|P27816|MAP4_HUMAN Microtubule-associated protein 4 OS=Homo sapiens OX=9606 GN=MAP4 PE=1 SV=3	1	13	13	13	13	13	13	16.1	16.1	16.1	121	1152	1152	0	101.26	16.1	41105000	41105000	21				114	264;283;716;889;1138;1143;1162;1210;1953;2110;2116;2117;2231	True;True;True;True;True;True;True;True;True;True;True;True;True	271;291;741;918;1176;1181;1200;1248;2028;2190;2197;2198;2317	305;325;835;1033;1313;1318;1319;1338;1389;2318;2499;2509;2510;2511;2830	512;513;514;557;1325;1622;2050;2056;2057;2077;2146;2147;3659;3660;3962;3981;3982;3983;3984;3985;3986;4521	513;557;1325;1622;2050;2056;2077;2147;3660;3962;3981;3985;4521
sp|P27824|CALX_HUMAN;sp|O14967|CLGN_HUMAN	sp|P27824|CALX_HUMAN	15;1	15;1	15;1	>sp|P27824|CALX_HUMAN Calnexin OS=Homo sapiens OX=9606 GN=CANX PE=1 SV=2	2	15	15	15	15	15	15	32.1	32.1	32.1	67.567	592	592;610	0	113.66	32.1	65660000	65660000	22				115	116;171;257;260;454;782;1014;1090;1116;1137;1358;2083;2084;2386;2409	True;True;True;True;True;True;True;True;True;True;True;True;True;True;True	118;176;264;267;469;809;1049;1127;1154;1175;1403;2163;2164;2475;2499	130;201;298;301;527;911;1177;1261;1289;1312;1565;2470;2471;3010;3038;3039	211;334;335;498;499;500;507;842;1435;1856;1976;1977;2017;2018;2049;2417;3916;3917;3918;4806;4855;4856	211;335;500;507;842;1435;1856;1976;2018;2049;2417;3916;3918;4806;4855
sp|P28799|GRN_HUMAN	sp|P28799|GRN_HUMAN	12	12	12	>sp|P28799|GRN_HUMAN Progranulin OS=Homo sapiens OX=9606 GN=GRN PE=1 SV=2	1	12	12	12	12	12	12	20.6	20.6	20.6	63.544	593	593	0	105.19	20.6	69061000	69061000	28				116	159;160;217;267;273;768;812;1685;1687;1688;1798;1904	True;True;True;True;True;True;True;True;True;True;True;True	164;165;222;223;274;280;795;839;1751;1753;1754;1755;1869;1979	186;187;188;252;253;308;314;897;946;2011;2013;2014;2015;2139;2262	311;312;313;314;315;316;317;318;424;425;520;530;531;532;533;534;535;1414;1415;1490;1491;3160;3161;3163;3164;3165;3166;3167;3355;3564;3565	311;316;424;520;531;1415;1491;3161;3163;3165;3355;3565	58	207
sp|P29401|TKT_HUMAN	sp|P29401|TKT_HUMAN	13	13	13	>sp|P29401|TKT_HUMAN Transketolase OS=Homo sapiens OX=9606 GN=TKT PE=1 SV=3	1	13	13	13	13	13	13	33.4	33.4	33.4	67.877	623	623	0	124.6	33.4	46079000	46079000	24				117	224;298;986;1002;1046;1088;1117;1273;1585;1854;1939;2108;2278	True;True;True;True;True;True;True;True;True;True;True;True;True	230;307;1018;1035;1083;1125;1155;1315;1640;1641;1929;2014;2188;2366	262;341;1143;1144;1162;1214;1259;1290;1465;1876;1877;1878;2208;2299;2496;2889	439;440;577;1800;1801;1829;1906;1907;1974;2019;2260;2947;2948;2949;2950;2951;3484;3625;3626;3627;3958;3959;4605;4606	439;577;1800;1829;1906;1974;2019;2260;2948;3484;3627;3958;4605	59	266
sp|P29966|MARCS_HUMAN	sp|P29966|MARCS_HUMAN	4	4	4	>sp|P29966|MARCS_HUMAN Myristoylated alanine-rich C-kinase substrate OS=Homo sapiens OX=9606 GN=MARCKS PE=1 SV=4	1	4	4	4	4	4	4	21.1	21.1	21.1	31.554	332	332	0	26.053	21.1	3130800	3130800	8				118	50;414;650;1948	True;True;True;True	50;428;672;2023	58;482;755;2311	90;91;92;776;777;778;1208;3650	90;778;1208;3650
sp|P30040|ERP29_HUMAN	sp|P30040|ERP29_HUMAN	4	4	4	>sp|P30040|ERP29_HUMAN Endoplasmic reticulum resident protein 29 OS=Homo sapiens OX=9606 GN=ERP29 PE=1 SV=4	1	4	4	4	4	4	4	24.9	24.9	24.9	28.993	261	261	0	28.365	24.9	4984800	4984800	8				119	325;760;987;1507	True;True;True;True	334;786;1019;1559	370;888;1145;1783	618;619;1398;1399;1400;1401;1802;2802	619;1400;1802;2802
sp|P30041|PRDX6_HUMAN	sp|P30041|PRDX6_HUMAN	4	4	4	>sp|P30041|PRDX6_HUMAN Peroxiredoxin-6 OS=Homo sapiens OX=9606 GN=PRDX6 PE=1 SV=3	1	4	4	4	4	4	4	26.3	26.3	26.3	25.035	224	224	0	44.532	26.3	6587900	6587900	4				120	324;1284;1357;1643	True;True;True;True	333;1326;1402;1703	369;1476;1564;1954	617;2273;2416;3072	617;2273;2416;3072
sp|P30048|PRDX3_HUMAN	sp|P30048|PRDX3_HUMAN	7	7	7	>sp|P30048|PRDX3_HUMAN Thioredoxin-dependent peroxide reductase, mitochondrial OS=Homo sapiens OX=9606 GN=PRDX3 PE=1 SV=3	1	7	7	7	7	7	7	52.3	52.3	52.3	27.692	256	256	0	50.969	52.3	32861000	32861000	12				121	74;153;393;728;777;849;1133	True;True;True;True;True;True;True	74;158;406;754;804;876;1171	83;180;455;851;906;987;1308	140;141;142;303;304;738;1348;1349;1428;1550;1551;2044	142;304;738;1349;1428;1551;2044
sp|P30084|ECHM_HUMAN	sp|P30084|ECHM_HUMAN	7	7	7	>sp|P30084|ECHM_HUMAN Enoyl-CoA hydratase, mitochondrial OS=Homo sapiens OX=9606 GN=ECHS1 PE=1 SV=4	1	7	7	7	7	7	7	36.2	36.2	36.2	31.387	290	290	0	62.772	36.2	13169000	13169000	9				122	60;137;177;488;914;1128;1601	True;True;True;True;True;True;True	60;142;182;503;943;1166;1659	69;164;207;564;1060;1303;1902	113;279;343;344;898;1656;1657;2038;2991;2992	113;279;344;898;1657;2038;2991
sp|P30101|PDIA3_HUMAN	sp|P30101|PDIA3_HUMAN	21	21	21	>sp|P30101|PDIA3_HUMAN Protein disulfide-isomerase A3 OS=Homo sapiens OX=9606 GN=PDIA3 PE=1 SV=4	1	21	21	21	21	21	21	50.9	50.9	50.9	56.782	505	505	0	168.9	50.9	105160000	105160000	33				123	304;326;354;481;541;578;584;617;678;942;1164;1203;1345;1469;1761;1811;1950;1951;2120;2176;2428	True;True;True;True;True;True;True;True;True;True;True;True;True;True;True;True;True;True;True;True;True	313;335;364;496;560;598;604;638;639;701;971;1202;1241;1390;1517;1518;1830;1882;2025;2026;2201;2260;2518	348;371;372;408;557;627;668;675;718;719;786;1088;1340;1381;1551;1738;1739;2099;2153;2315;2316;2514;2764;3059	587;620;621;666;888;1009;1010;1068;1076;1151;1152;1153;1251;1252;1706;1707;1708;2079;2080;2134;2135;2399;2740;2741;2742;2743;3296;3376;3655;3656;3990;4424;4887	587;621;666;888;1009;1068;1076;1152;1252;1707;2080;2135;2399;2743;3296;3376;3655;3656;3990;4424;4887	60;61	338;434
sp|P31040|SDHA_HUMAN	sp|P31040|SDHA_HUMAN	8	8	8	>sp|P31040|SDHA_HUMAN Succinate dehydrogenase [ubiquinone] flavoprotein subunit, mitochondrial OS=Homo sapiens OX=9606 GN=SDHA PE=1 SV=2	1	8	8	8	8	8	8	22.4	22.4	22.4	72.691	664	664	0	85.879	22.4	23518000	23518000	22				124	10;89;654;918;1251;1876;2141;2331	True;True;True;True;True;True;True;True	10;90;676;947;1293;1951;2223;2224;2420	10;99;759;1064;1440;1441;2233;2539;2540;2949	17;18;165;1213;1214;1215;1663;1664;2225;2226;2227;2228;2229;3520;4033;4034;4700;4701;4702;4703;4704;4705	18;165;1215;1664;2227;3520;4034;4701	62	279
sp|P31930|QCR1_HUMAN	sp|P31930|QCR1_HUMAN	4	4	4	>sp|P31930|QCR1_HUMAN Cytochrome b-c1 complex subunit 1, mitochondrial OS=Homo sapiens OX=9606 GN=UQCRC1 PE=1 SV=3	1	4	4	4	4	4	4	11.7	11.7	11.7	52.645	480	480	0	22.872	11.7	2200300	2200300	4				125	486;519;1219;1532	True;True;True;True	501;538;1258;1587	562;604;1399;1816	895;971;2162;2853	895;971;2162;2853
sp|P31939|PUR9_HUMAN	sp|P31939|PUR9_HUMAN	9	9	9	>sp|P31939|PUR9_HUMAN Bifunctional purine biosynthesis protein PURH OS=Homo sapiens OX=9606 GN=ATIC PE=1 SV=3	1	9	9	9	9	9	9	26.9	26.9	26.9	64.615	592	592	0	86.465	26.9	11532000	11532000	12				126	388;890;1512;1552;1554;1835;2119;2426;2461	True;True;True;True;True;True;True;True;True	401;919;1566;1607;1609;1910;2200;2516;2551	450;1034;1792;1836;1838;2185;2513;3057;3094	733;1623;2822;2889;2892;3442;3988;3989;4883;4884;4885;4951	733;1623;2822;2889;2892;3442;3989;4885;4951
sp|P31948|STIP1_HUMAN	sp|P31948|STIP1_HUMAN	10	10	10	>sp|P31948|STIP1_HUMAN Stress-induced-phosphoprotein 1 OS=Homo sapiens OX=9606 GN=STIP1 PE=1 SV=1	1	10	10	10	10	10	10	18.8	18.8	18.8	62.639	543	543	0	58.847	18.8	12366000	12366000	12				127	367;398;471;649;814;816;1077;1292;2059;2140	True;True;True;True;True;True;True;True;True;True	379;412;486;671;841;843;1114;1334;2137;2222	425;465;545;754;948;950;1248;1484;2440;2538	694;750;872;1207;1493;1496;1962;2286;2287;3863;4031;4032	694;750;872;1207;1493;1496;1962;2287;3863;4032
sp|P32119|PRDX2_HUMAN	sp|P32119|PRDX2_HUMAN	6	5	5	>sp|P32119|PRDX2_HUMAN Peroxiredoxin-2 OS=Homo sapiens OX=9606 GN=PRDX2 PE=1 SV=5	1	6	5	5	6	5	5	25.3	19.7	19.7	21.892	198	198	0	30.751	25.3	7410800	7410800	5				128	205;727;1387;1692;1766;1979	True;True;True;False;True;True	210;753;1433;1759;1836;2054	240;850;1598;2021;2105;2348	405;1347;2464;3177;3305;3718	405;1347;2464;3177;3305;3718
sp|P34897|GLYM_HUMAN	sp|P34897|GLYM_HUMAN	4	4	4	>sp|P34897|GLYM_HUMAN Serine hydroxymethyltransferase, mitochondrial OS=Homo sapiens OX=9606 GN=SHMT2 PE=1 SV=3	1	4	4	4	4	4	4	8.3	8.3	8.3	55.992	504	504	0	31.83	8.3	12781000	12781000	6				129	810;1252;1288;2285	True;True;True;True	837;1294;1330;2373	944;1442;1480;2897	1486;1487;1488;2230;2281;4620	1487;2230;2281;4620
sp|P34932|HSP74_HUMAN;sp|O95757|HS74L_HUMAN	sp|P34932|HSP74_HUMAN	14;1	14;1	13;0	>sp|P34932|HSP74_HUMAN Heat shock 70 kDa protein 4 OS=Homo sapiens OX=9606 GN=HSPA4 PE=1 SV=4	2	14	14	13	14	14	13	22.7	22.7	21.1	94.33	840	840;839	0	125.78	22.7	16844000	16844000	24				130	58;75;85;285;483;638;1132;1340;1474;1721;1878;1927;2273;2391	True;True;True;True;True;True;True;True;True;True;True;True;True;True	58;75;86;293;498;660;1170;1385;1523;1789;1953;2002;2361;2480	67;84;95;327;559;743;1307;1545;1744;2056;2235;2287;2884;3016	106;107;108;143;160;559;890;891;892;1191;2043;2386;2387;2388;2749;3233;3523;3524;3599;3600;3601;4597;4598;4816;4817	108;143;160;559;891;1191;2043;2386;2749;3233;3523;3599;4598;4816
sp|P35221|CTNA1_HUMAN;sp|P26232|CTNA2_HUMAN	sp|P35221|CTNA1_HUMAN	8;1	8;1	8;1	>sp|P35221|CTNA1_HUMAN Catenin alpha-1 OS=Homo sapiens OX=9606 GN=CTNNA1 PE=1 SV=1	2	8	8	8	8	8	8	13.5	13.5	13.5	100.07	906	906;953	0	79.033	13.5	5468100	5468100	14				131	2;59;108;899;1087;1528;2109;2264	True;True;True;True;True;True;True;True	2;59;109;928;1124;1583;2189;2351	2;68;120;1043;1258;1812;2497;2498;2871	4;109;110;111;112;193;194;1632;1633;1973;2848;3960;3961;4578	4;110;194;1632;1973;2848;3960;4578
sp|P35579|MYH9_HUMAN;sp|P35749|MYH11_HUMAN;sp|P35580|MYH10_HUMAN;sp|Q7Z406|MYH14_HUMAN	sp|P35579|MYH9_HUMAN	26;2;2;1	26;2;2;1	26;2;2;1	>sp|P35579|MYH9_HUMAN Myosin-9 OS=Homo sapiens OX=9606 GN=MYH9 PE=1 SV=4	4	26	26	26	26	26	26	19.5	19.5	19.5	226.53	1960	1960;1972;1976;1995	0	247.23	19.5	32323000	32323000	35				132	156;467;873;898;907;908;909;1096;1126;1148;1227;1300;1371;1377;1621;1658;1667;1698;1718;1726;1824;1875;1999;2026;2195;2257	True;True;True;True;True;True;True;True;True;True;True;True;True;True;True;True;True;True;True;True;True;True;True;True;True;True	161;482;901;927;936;937;938;1134;1164;1186;1266;1342;1417;1423;1681;1719;1729;1765;1786;1794;1897;1950;2074;2102;2280;2344	183;541;1015;1042;1051;1052;1053;1268;1301;1324;1408;1493;1581;1587;1928;1975;1985;2028;2052;2061;2169;2232;2369;2401;2787;2864	307;867;868;1590;1631;1644;1645;1646;1647;1989;2035;2036;2062;2176;2302;2440;2449;3035;3036;3037;3105;3106;3120;3188;3189;3227;3228;3239;3408;3519;3748;3790;4453;4454;4570	307;867;1590;1631;1645;1646;1647;1989;2035;2062;2176;2302;2440;2449;3036;3106;3120;3189;3227;3239;3408;3519;3748;3790;4454;4570
sp|P35606|COPB2_HUMAN	sp|P35606|COPB2_HUMAN	5	5	5	>sp|P35606|COPB2_HUMAN Coatomer subunit beta OS=Homo sapiens OX=9606 GN=COPB2 PE=1 SV=2	1	5	5	5	5	5	5	7.6	7.6	7.6	102.49	906	906	0	31.389	7.6	5940200	5940200	7				133	360;872;1632;2208;2376	True;True;True;True;True	372;900;1692;2294;2465	417;1014;1940;2803;2999	678;679;1589;3053;3054;4484;4787	679;1589;3053;4484;4787
sp|P35637|FUS_HUMAN;sp|Q92804|RBP56_HUMAN	sp|P35637|FUS_HUMAN	6;2	6;2	6;2	>sp|P35637|FUS_HUMAN RNA-binding protein FUS OS=Homo sapiens OX=9606 GN=FUS PE=1 SV=1	2	6	6	6	6	6	6	13.1	13.1	13.1	53.425	526	526;592	0	46.656	13.1	13074000	13074000	8				134	12;13;167;651;1302;2019	True;True;True;True;True;True	12;13;172;673;1344;2095	12;13;197;756;1495;2394	20;21;22;23;330;1209;2305;2306;3781	20;23;330;1209;2306;3781
sp|P36578|RL4_HUMAN	sp|P36578|RL4_HUMAN	7	7	7	>sp|P36578|RL4_HUMAN 60S ribosomal protein L4 OS=Homo sapiens OX=9606 GN=RPL4 PE=1 SV=5	1	7	7	7	7	7	7	23.4	23.4	23.4	47.697	427	427	0	51.153	23.4	34578000	34578000	13				135	0;166;929;1485;1561;1711;1832	True;True;True;True;True;True;True	0;171;958;1537;1616;1778;1906;1907	0;195;196;1075;1758;1846;2041;2181;2182	0;1;328;329;1685;1686;1687;2771;2904;3206;3207;3435;3436	1;329;1685;2771;2904;3206;3436	63	95
sp|P37837|TALDO_HUMAN	sp|P37837|TALDO_HUMAN	4	4	4	>sp|P37837|TALDO_HUMAN Transaldolase OS=Homo sapiens OX=9606 GN=TALDO1 PE=1 SV=2	1	4	4	4	4	4	4	12.8	12.8	12.8	37.54	337	337	0	25.724	12.8	2962800	2962800	6				136	1388;1946;2045;2387	True;True;True;True	1434;2021;2122;2476	1599;2309;2423;3011	2465;2466;2467;3648;3837;4807	2466;3648;3837;4807
sp|P38159|RBMX_HUMAN;sp|Q96E39|RMXL1_HUMAN;sp|O75526|RMXL2_HUMAN;sp|Q8N7X1|RMXL3_HUMAN	sp|P38159|RBMX_HUMAN;sp|Q96E39|RMXL1_HUMAN	5;4;1;1	5;4;1;1	5;4;1;1	>sp|P38159|RBMX_HUMAN RNA-binding motif protein, X chromosome OS=Homo sapiens OX=9606 GN=RBMX PE=1 SV=3;>sp|Q96E39|RMXL1_HUMAN RNA binding motif protein, X-linked-like-1 OS=Homo sapiens OX=9606 GN=RBMXL1 PE=1 SV=1	4	5	5	5	5	5	5	15.9	15.9	15.9	42.331	391	391;390;392;1067	0	41.586	15.9	7955700	7955700	7				137	107;667;754;1244;2407	True;True;True;True;True	108;689;780;1285;2497	118;119;772;882;1428;3036	191;192;1232;1389;2204;2205;4853	191;1232;1389;2205;4853
sp|P38646|GRP75_HUMAN	sp|P38646|GRP75_HUMAN	34	34	34	>sp|P38646|GRP75_HUMAN Stress-70 protein, mitochondrial OS=Homo sapiens OX=9606 GN=HSPA9 PE=1 SV=2	1	34	34	34	34	34	34	54.2	54.2	54.2	73.68	679	679	0	323.31	54.2	254730000	254730000	54				138	113;151;178;202;293;313;374;445;492;493;503;506;1092;1160;1315;1421;1460;1492;1535;1628;1654;1660;1661;1775;1784;1806;1903;1928;2114;2194;2253;2286;2326;2406	True;True;True;True;True;True;True;True;True;True;True;True;True;True;True;True;True;True;True;True;True;True;True;True;True;True;True;True;True;True;True;True;True;True	114;156;183;207;301;322;386;460;507;508;518;521;522;1129;1198;1358;1467;1507;1544;1590;1688;1714;1715;1721;1722;1723;1845;1855;1877;1978;2003;2195;2279;2340;2374;2415;2496	126;178;208;209;236;237;335;357;434;516;517;568;569;581;582;586;587;1263;1336;1512;1687;1728;1767;1819;1936;1969;1970;1977;1978;1979;2114;2124;2148;2260;2261;2288;2507;2786;2860;2898;2943;3035	203;204;205;300;301;345;346;347;348;399;400;401;570;600;712;827;828;906;907;908;909;929;930;937;938;1979;2075;2338;2651;2724;2725;2781;2859;2860;3045;3097;3098;3099;3108;3109;3110;3111;3112;3113;3322;3334;3335;3370;3561;3562;3563;3602;3603;3977;3978;4452;4565;4621;4622;4623;4692;4693;4852	204;301;346;400;570;600;712;828;908;909;930;937;1979;2075;2338;2651;2724;2781;2860;3045;3097;3110;3113;3322;3335;3370;3562;3603;3978;4452;4565;4622;4692;4852	64	303
sp|P39019|RS19_HUMAN	sp|P39019|RS19_HUMAN	4	4	4	>sp|P39019|RS19_HUMAN 40S ribosomal protein S19 OS=Homo sapiens OX=9606 GN=RPS19 PE=1 SV=2	1	4	4	4	4	4	4	25.5	25.5	25.5	16.06	145	145	0	22.575	25.5	2805000	2805000	4				139	685;901;1413;1783	True;True;True;True	708;930;1459;1854	793;1045;1679;2123	1260;1636;2642;3333	1260;1636;2642;3333
sp|P39023|RL3_HUMAN;sp|Q92901|RL3L_HUMAN	sp|P39023|RL3_HUMAN	5;1	5;1	5;1	>sp|P39023|RL3_HUMAN 60S ribosomal protein L3 OS=Homo sapiens OX=9606 GN=RPL3 PE=1 SV=2	2	5	5	5	5	5	5	21.8	21.8	21.8	46.108	403	403;407	0	38.301	21.8	9771200	9771200	7				140	100;495;1168;1593;1843	True;True;True;True;True	101;510;1206;1651;1918	110;573;1344;1894;2194	179;916;917;2084;2979;3454;3455	179;917;2084;2979;3455
sp|P39656|OST48_HUMAN	sp|P39656|OST48_HUMAN	4	4	4	>sp|P39656|OST48_HUMAN Dolichyl-diphosphooligosaccharide--protein glycosyltransferase 48 kDa subunit OS=Homo sapiens OX=9606 GN=DDOST PE=1 SV=4	1	4	4	4	4	4	4	25.7	25.7	25.7	50.8	456	456	0	32.404	25.7	4554900	4554900	7				141	790;1966;2069;2217	True;True;True;True	817;2041;2148;2303	922;2334;2452;2812	1449;1450;3695;3884;4494;4495;4496	1450;3695;3884;4496
sp|P40227|TCPZ_HUMAN;sp|Q92526|TCPW_HUMAN	sp|P40227|TCPZ_HUMAN	7;1	7;1	7;1	>sp|P40227|TCPZ_HUMAN T-complex protein 1 subunit zeta OS=Homo sapiens OX=9606 GN=CCT6A PE=1 SV=3	2	7	7	7	7	7	7	19.4	19.4	19.4	58.024	531	531;530	0	46.787	19.4	4391100	4391100	11				142	181;841;1145;1498;1530;2051;2235	True;True;True;True;True;True;True	186;868;1183;1550;1585;2128;2321	213;214;979;1321;1773;1814;2431;2834	359;360;361;1541;2059;2790;2851;3847;3848;4526;4527	360;1541;2059;2790;2851;3847;4527
sp|P40429|RL13A_HUMAN;sp|Q6NVV1|R13P3_HUMAN	sp|P40429|RL13A_HUMAN;sp|Q6NVV1|R13P3_HUMAN	4;2	4;2	4;2	>sp|P40429|RL13A_HUMAN 60S ribosomal protein L13a OS=Homo sapiens OX=9606 GN=RPL13A PE=1 SV=2;>sp|Q6NVV1|R13P3_HUMAN Putative 60S ribosomal protein L13a protein RPL13AP3 OS=Homo sapiens OX=9606 GN=RPL13AP3 PE=5 SV=1	2	4	4	4	4	4	4	20.2	20.2	20.2	23.577	203	203;102	0	24.806	20.2	10824000	10824000	4				143	255;1114;1526;2449	True;True;True;True	262;1152;1581;2539	296;1287;1810;3082	495;2015;2845;4930;4931	495;2015;2845;4931
sp|P40925|MDHC_HUMAN	sp|P40925|MDHC_HUMAN	4	4	4	>sp|P40925|MDHC_HUMAN Malate dehydrogenase, cytoplasmic OS=Homo sapiens OX=9606 GN=MDH1 PE=1 SV=4	1	4	4	4	4	4	4	18.3	18.3	18.3	36.426	334	334	0	41.67	18.3	12178000	12178000	6				144	524;1282;1630;2261	True;True;True;True	543;1324;1690;2348	609;1474;1938;2868	978;2271;3048;3049;4574;4575	978;2271;3049;4575
sp|P40926|MDHM_HUMAN	sp|P40926|MDHM_HUMAN	12	12	12	>sp|P40926|MDHM_HUMAN Malate dehydrogenase, mitochondrial OS=Homo sapiens OX=9606 GN=MDH2 PE=1 SV=3	1	12	12	12	12	12	12	47.9	47.9	47.9	35.503	338	338	0	131.28	47.9	72902000	72902000	21				145	82;198;451;616;639;832;1021;1411;1487;1894;2166;2180	True;True;True;True;True;True;True;True;True;True;True;True	82;83;203;466;637;661;859;1058;1457;1539;1969;2250;2265	91;92;231;524;717;744;969;1189;1676;1677;1760;2251;2754;2769;2770;2771	152;153;154;388;838;1150;1192;1193;1527;1874;2636;2637;2638;2639;2640;2773;3549;3550;4410;4411;4429;4430;4431	154;388;838;1150;1193;1527;1874;2637;2773;3550;4411;4431	65	251
sp|P40939|ECHA_HUMAN	sp|P40939|ECHA_HUMAN	15	15	15	>sp|P40939|ECHA_HUMAN Trifunctional enzyme subunit alpha, mitochondrial OS=Homo sapiens OX=9606 GN=HADHA PE=1 SV=2	1	15	15	15	15	15	15	26.3	26.3	26.3	82.999	763	763	0	167.48	26.3	24561000	24561000	20				146	45;306;328;375;383;474;567;615;683;1000;1480;1505;1814;2012;2063	True;True;True;True;True;True;True;True;True;True;True;True;True;True;True	45;315;337;387;395;489;586;636;706;1033;1530;1557;1885;2088;2142	52;53;350;375;435;443;548;655;716;791;1160;1751;1781;2156;2387;2445	80;81;82;83;589;624;625;713;724;875;876;1050;1149;1257;1258;1826;2760;2799;3380;3381;3769;3770;3870	80;589;625;713;724;876;1050;1149;1258;1826;2760;2799;3380;3769;3870
sp|P42704|LPPRC_HUMAN	sp|P42704|LPPRC_HUMAN	18	18	18	>sp|P42704|LPPRC_HUMAN Leucine-rich PPR motif-containing protein, mitochondrial OS=Homo sapiens OX=9606 GN=LRPPRC PE=1 SV=3	1	18	18	18	18	18	18	17.9	17.9	17.9	157.9	1394	1394	0	120.05	17.9	15360000	15360000	26				147	63;287;647;680;741;1022;1201;1286;1476;1597;1626;1808;1913;1936;2127;2244;2245;2377	True;True;True;True;True;True;True;True;True;True;True;True;True;True;True;True;True;True	63;295;669;703;767;1059;1239;1328;1526;1655;1686;1879;1988;2011;2208;2330;2331;2466	72;329;752;788;869;1190;1379;1478;1747;1898;1934;2150;2272;2296;2522;2844;2845;3000	124;561;1205;1254;1373;1875;1876;2132;2277;2278;2754;2755;2756;2983;2984;2985;3043;3372;3373;3578;3621;4000;4001;4541;4542;4543;4788	124;561;1205;1254;1373;1875;2132;2277;2755;2985;3043;3373;3578;3621;4001;4541;4543;4788
sp|P42765|THIM_HUMAN	sp|P42765|THIM_HUMAN	11	11	11	>sp|P42765|THIM_HUMAN 3-ketoacyl-CoA thiolase, mitochondrial OS=Homo sapiens OX=9606 GN=ACAA2 PE=1 SV=2	1	11	11	11	11	11	11	45.3	45.3	45.3	41.924	397	397	0	116.15	45.3	24231000	24231000	20				148	16;91;323;332;429;722;1727;2080;2085;2338;2385	True;True;True;True;True;True;True;True;True;True;True	16;92;332;341;443;748;1795;2160;2165;2427;2474	17;101;368;382;498;844;2062;2467;2472;2957;3009	27;28;167;168;616;632;633;798;799;1339;3240;3911;3912;3919;4716;4717;4718;4719;4804;4805	27;167;616;633;799;1339;3240;3912;3919;4719;4804
sp|P46777|RL5_HUMAN	sp|P46777|RL5_HUMAN	4	4	4	>sp|P46777|RL5_HUMAN 60S ribosomal protein L5 OS=Homo sapiens OX=9606 GN=RPL5 PE=1 SV=3	1	4	4	4	4	4	4	15.8	15.8	15.8	34.362	297	297	0	27.07	15.8	9201300	9201300	7				149	837;1619;1751;2441	True;True;True;True	864;1679;1820;2531	975;1926;2089;3073	1536;1537;3031;3279;3280;4910;4911	1536;3031;3279;4911
sp|P48643|TCPE_HUMAN	sp|P48643|TCPE_HUMAN	5	5	5	>sp|P48643|TCPE_HUMAN T-complex protein 1 subunit epsilon OS=Homo sapiens OX=9606 GN=CCT5 PE=1 SV=1	1	5	5	5	5	5	5	18.5	18.5	18.5	59.67	541	541	0	33.638	18.5	4187000	4187000	10				150	61;791;1712;2154;2394	True;True;True;True;True	61;818;1779;2237;2483	70;923;2042;2553;3020	114;115;116;117;1451;1452;3208;4048;4824;4825	115;1452;3208;4048;4824
sp|P49327|FAS_HUMAN	sp|P49327|FAS_HUMAN	14	14	14	>sp|P49327|FAS_HUMAN Fatty acid synthase OS=Homo sapiens OX=9606 GN=FASN PE=1 SV=3	1	14	14	14	14	14	14	9.2	9.2	9.2	273.42	2511	2511	0	104.58	9.2	12779000	12779000	21				151	66;288;357;423;547;550;597;744;1243;1268;1874;2058;2212;2367	True;True;True;True;True;True;True;True;True;True;True;True;True;True	66;296;367;437;566;569;617;770;1284;1310;1949;2136;2298;2456	75;330;411;412;492;633;636;689;872;1427;1460;2231;2439;2807;2989	127;562;563;564;669;670;671;788;1018;1021;1022;1102;1377;2203;2253;2254;3517;3518;3861;3862;4488;4773	127;563;670;788;1018;1021;1102;1377;2203;2253;3517;3861;4488;4773
sp|P49368|TCPG_HUMAN	sp|P49368|TCPG_HUMAN	5	5	5	>sp|P49368|TCPG_HUMAN T-complex protein 1 subunit gamma OS=Homo sapiens OX=9606 GN=CCT3 PE=1 SV=4	1	5	5	5	5	5	5	13.2	13.2	13.2	60.533	545	545	0	31.495	13.2	5727100	5727100	5				152	457;792;1016;1175;1631	True;True;True;True;True	472;819;1051;1213;1691	530;924;1179;1352;1939	845;1453;1859;2095;3050;3051;3052	845;1453;1859;2095;3050
sp|P49419|AL7A1_HUMAN	sp|P49419|AL7A1_HUMAN	8	8	8	>sp|P49419|AL7A1_HUMAN Alpha-aminoadipic semialdehyde dehydrogenase OS=Homo sapiens OX=9606 GN=ALDH7A1 PE=1 SV=5	1	8	8	8	8	8	8	22.1	22.1	22.1	58.486	539	539	0	70.851	22.1	16179000	16179000	9				153	355;665;1482;1733;1762;2229;2280;2308	True;True;True;True;True;True;True;True	365;687;1533;1801;1831;2315;2368;2397	409;770;1754;2068;2100;2828;2892;2923	667;1229;1230;2766;3251;3297;4519;4614;4615;4662	667;1230;2766;3251;3297;4519;4614;4662
sp|P49588|SYAC_HUMAN	sp|P49588|SYAC_HUMAN	4	4	4	>sp|P49588|SYAC_HUMAN Alanine--tRNA ligase, cytoplasmic OS=Homo sapiens OX=9606 GN=AARS PE=1 SV=2	1	4	4	4	4	4	4	5.9	5.9	5.9	106.81	968	968	0	31.056	5.9	2389500	2389500	5				154	236;1061;1629;2209	True;True;True;True	243;1098;1689;2295	276;1232;1937;2804	461;1936;3046;3047;4485	461;1936;3046;4485
sp|P49736|MCM2_HUMAN	sp|P49736|MCM2_HUMAN	4	4	4	>sp|P49736|MCM2_HUMAN DNA replication licensing factor MCM2 OS=Homo sapiens OX=9606 GN=MCM2 PE=1 SV=4	1	4	4	4	4	4	4	6.6	6.6	6.6	101.89	904	904	0	22.548	6.6	3163000	3163000	3				155	561;940;1706;2165	True;True;True;True	580;969;1773;2249	649;1086;2036;2753	1042;1703;3200;4409	1042;1703;3200;4409
sp|P50395|GDIB_HUMAN;sp|P31150|GDIA_HUMAN	sp|P50395|GDIB_HUMAN	11;3	11;3	11;3	>sp|P50395|GDIB_HUMAN Rab GDP dissociation inhibitor beta OS=Homo sapiens OX=9606 GN=GDI2 PE=1 SV=2	2	11	11	11	11	11	11	33.5	33.5	33.5	50.663	445	445;447	0	79.496	33.5	11865000	11865000	16				156	582;589;1076;1382;1459;1514;1627;1977;2139;2318;2345	True;True;True;True;True;True;True;True;True;True;True	602;609;1113;1428;1506;1568;1687;2052;2221;2407;2434	673;680;1247;1592;1727;1795;1935;2346;2537;2934;2935;2964	1073;1089;1961;2455;2723;2825;3044;3714;3715;3716;4030;4678;4679;4680;4733;4734	1073;1089;1961;2455;2723;2825;3044;3715;4030;4679;4733
sp|P50454|SERPH_HUMAN	sp|P50454|SERPH_HUMAN	12	12	12	>sp|P50454|SERPH_HUMAN Serpin H1 OS=Homo sapiens OX=9606 GN=SERPINH1 PE=1 SV=2	1	12	12	12	12	12	12	43.3	43.3	43.3	46.44	418	418	0	104.99	43.3	25150000	25150000	21				157	231;369;798;842;843;1135;1250;1368;1449;1789;1980;2015	True;True;True;True;True;True;True;True;True;True;True;True	237;381;825;869;870;1173;1292;1413;1496;1860;2055;2091	270;427;428;931;980;981;1310;1439;1577;1717;2130;2349;2390	451;452;697;698;699;700;701;702;1466;1542;1543;1544;2046;2224;2434;2703;2704;3342;3343;3719;3775	452;699;1466;1542;1544;2046;2224;2434;2703;3343;3719;3775
sp|P50895|BCAM_HUMAN	sp|P50895|BCAM_HUMAN	4	4	4	>sp|P50895|BCAM_HUMAN Basal cell adhesion molecule OS=Homo sapiens OX=9606 GN=BCAM PE=1 SV=2	1	4	4	4	4	4	4	9.4	9.4	9.4	67.404	628	628	0	24.092	9.4	2800200	2800200	4				158	80;1206;1351;1426	True;True;True;True	80;1244;1396;1472	89;1385;1558;1692	149;150;2140;2409;2660	150;2140;2409;2660
sp|P50990|TCPQ_HUMAN	sp|P50990|TCPQ_HUMAN	8	8	8	>sp|P50990|TCPQ_HUMAN T-complex protein 1 subunit theta OS=Homo sapiens OX=9606 GN=CCT8 PE=1 SV=4	1	8	8	8	8	8	8	16.1	16.1	16.1	59.62	548	548	0	64.079	16.1	10251000	10251000	11				159	102;162;338;470;653;1209;1249;1738	True;True;True;True;True;True;True;True	103;167;348;485;675;1247;1291;1807	113;190;389;544;758;1388;1438;2074	182;183;320;321;643;871;1211;1212;2145;2223;3261	182;320;643;871;1212;2145;2223;3261
sp|P50991|TCPD_HUMAN	sp|P50991|TCPD_HUMAN	9	9	9	>sp|P50991|TCPD_HUMAN T-complex protein 1 subunit delta OS=Homo sapiens OX=9606 GN=CCT4 PE=1 SV=4	1	9	9	9	9	9	9	23	23	23	57.924	539	539	0	61.927	23	10113000	10113000	16				160	62;128;240;507;604;1486;2008;2065;2337	True;True;True;True;True;True;True;True;True	62;131;247;523;625;1538;2084;2144;2426	71;145;280;588;698;1759;2382;2448;2956	118;119;120;121;122;123;234;465;466;939;1120;2772;3763;3877;3878;4715	121;234;465;939;1120;2772;3763;3877;4715
sp|P51149|RAB7A_HUMAN	sp|P51149|RAB7A_HUMAN	7	7	7	>sp|P51149|RAB7A_HUMAN Ras-related protein Rab-7a OS=Homo sapiens OX=9606 GN=RAB7A PE=1 SV=1	1	7	7	7	7	7	7	42	42	42	23.489	207	207	0	78.195	42	15965000	15965000	10				161	409;624;1442;1595;1744;2106;2249	True;True;True;True;True;True;True	423;646;1488;1653;1813;2186;2336	476;728;1709;1896;2080;2494;2854	765;766;1164;1165;2689;2690;2981;3269;3956;4559	765;1164;2689;2981;3269;3956;4559
sp|P51610|HCFC1_HUMAN	sp|P51610|HCFC1_HUMAN	6	6	6	>sp|P51610|HCFC1_HUMAN Host cell factor 1 OS=Homo sapiens OX=9606 GN=HCFC1 PE=1 SV=2	1	6	6	6	6	6	6	4.9	4.9	4.9	208.73	2035	2035	0	46.385	4.9	17739000	17739000	15				162	910;1887;1891;2161;2301;2347	True;True;True;True;True;True	939;1962;1966;2245;2390;2436	1054;1055;1056;2244;2248;2562;2916;2966	1648;1649;1650;1651;1652;3539;3544;3545;4063;4064;4065;4651;4652;4736;4737	1652;3539;3545;4064;4652;4736
sp|P51649|SSDH_HUMAN	sp|P51649|SSDH_HUMAN	6	6	6	>sp|P51649|SSDH_HUMAN Succinate-semialdehyde dehydrogenase, mitochondrial OS=Homo sapiens OX=9606 GN=ALDH5A1 PE=1 SV=2	1	6	6	6	6	6	6	18.1	18.1	18.1	57.214	535	535	0	55.35	18.1	7662700	7662700	8				163	522;1036;1624;1986;2228;2336	True;True;True;True;True;True	541;1073;1684;2061;2314;2425	607;1204;1931;1932;2356;2827;2955	975;976;1894;3040;3041;3730;4518;4714	975;1894;3041;3730;4518;4714
sp|P51659|DHB4_HUMAN	sp|P51659|DHB4_HUMAN	8	8	8	>sp|P51659|DHB4_HUMAN Peroxisomal multifunctional enzyme type 2 OS=Homo sapiens OX=9606 GN=HSD17B4 PE=1 SV=3	1	8	8	8	8	8	8	18.1	18.1	18.1	79.685	736	736	0	64.334	18.1	8852000	8852000	8				164	214;219;1033;1158;2164;2293;2323;2372	True;True;True;True;True;True;True;True	219;225;1070;1196;2248;2381;2412;2461	249;256;1201;1334;2752;2907;2940;2995	419;429;430;1891;2073;4408;4639;4688;4783	419;429;1891;2073;4408;4639;4688;4783
sp|P52209|6PGD_HUMAN	sp|P52209|6PGD_HUMAN	8	8	8	>sp|P52209|6PGD_HUMAN 6-phosphogluconate dehydrogenase, decarboxylating OS=Homo sapiens OX=9606 GN=PGD PE=1 SV=3	1	8	8	8	8	8	8	20.3	20.3	20.3	53.139	483	483	0	80.813	20.3	9205200	9205200	10				165	95;711;1793;1817;2036;2178;2233;2427	True;True;True;True;True;True;True;True	96;736;1864;1888;2113;2262;2319;2517	105;830;2134;2159;2414;2766;2832;3058	173;1317;1318;3348;3385;3818;4426;4523;4524;4886	173;1317;3348;3385;3818;4426;4524;4886
sp|P53396|ACLY_HUMAN	sp|P53396|ACLY_HUMAN	5	5	5	>sp|P53396|ACLY_HUMAN ATP-citrate synthase OS=Homo sapiens OX=9606 GN=ACLY PE=1 SV=3	1	5	5	5	5	5	5	5.4	5.4	5.4	120.84	1101	1101	0	33.207	5.4	3303000	3303000	4				166	65;575;1272;1458;1826	True;True;True;True;True	65;595;1314;1505;1899	74;665;1464;1726;2171	126;1064;1065;2259;2722;3412	126;1065;2259;2722;3412
sp|P53597|SUCA_HUMAN	sp|P53597|SUCA_HUMAN	4	4	4	>sp|P53597|SUCA_HUMAN Succinate--CoA ligase [ADP/GDP-forming] subunit alpha, mitochondrial OS=Homo sapiens OX=9606 GN=SUCLG1 PE=1 SV=4	1	4	4	4	4	4	4	17.9	17.9	17.9	36.249	346	346	0	28.282	17.9	8344000	8344000	5				167	964;1032;1287;1420	True;True;True;True	993;1069;1329;1466	1111;1200;1479;1686	1741;1890;2279;2280;2650	1741;1890;2280;2650
sp|P53992|SC24C_HUMAN	sp|P53992|SC24C_HUMAN	4	4	4	>sp|P53992|SC24C_HUMAN Protein transport protein Sec24C OS=Homo sapiens OX=9606 GN=SEC24C PE=1 SV=3	1	4	4	4	4	4	4	5.3	5.3	5.3	118.32	1094	1094	0	27.247	5.3	2710800	2710800	5				168	228;1807;1892;2404	True;True;True;True	234;1878;1967;2494	267;2149;2249;3033	448;3371;3546;3547;4849	448;3371;3546;4849
sp|P54578|UBP14_HUMAN	sp|P54578|UBP14_HUMAN	4	4	4	>sp|P54578|UBP14_HUMAN Ubiquitin carboxyl-terminal hydrolase 14 OS=Homo sapiens OX=9606 GN=USP14 PE=1 SV=3	1	4	4	4	4	4	4	13	13	13	56.068	494	494	0	35.733	13	2584000	2584000	5				169	284;1234;1356;1389	True;True;True;True	292;1275;1401;1435	326;1418;1563;1600	558;2189;2190;2191;2415;2468	558;2189;2415;2468
sp|P54886|P5CS_HUMAN	sp|P54886|P5CS_HUMAN	12	12	12	>sp|P54886|P5CS_HUMAN Delta-1-pyrroline-5-carboxylate synthase OS=Homo sapiens OX=9606 GN=ALDH18A1 PE=1 SV=2	1	12	12	12	12	12	12	18.1	18.1	18.1	87.301	795	795	0	79.439	18.1	20908000	20908000	19				170	351;720;757;995;1274;1349;1656;2091;2092;2232;2334;2440	True;True;True;True;True;True;True;True;True;True;True;True	361;746;783;1027;1316;1394;1717;2171;2172;2318;2423;2530	404;841;885;1153;1466;1556;1972;2478;2479;2831;2953;3072	661;662;1333;1334;1395;1814;2261;2406;2407;3101;3930;3931;3932;3933;3934;4522;4711;4712;4909	661;1333;1395;1814;2261;2406;3101;3931;3934;4522;4711;4909
sp|P55060|XPO2_HUMAN	sp|P55060|XPO2_HUMAN	5	5	5	>sp|P55060|XPO2_HUMAN Exportin-2 OS=Homo sapiens OX=9606 GN=CSE1L PE=1 SV=3	1	5	5	5	5	5	5	5.9	5.9	5.9	110.42	971	971	0	30.014	5.9	3510700	3510700	6				171	587;966;1401;1792;2053	True;True;True;True;True	607;995;1447;1863;2130	678;1114;1665;2133;2433	1084;1085;1086;1745;2619;3347;3852	1086;1745;2619;3347;3852
sp|P55072|TERA_HUMAN	sp|P55072|TERA_HUMAN	14	14	14	>sp|P55072|TERA_HUMAN Transitional endoplasmic reticulum ATPase OS=Homo sapiens OX=9606 GN=VCP PE=1 SV=4	1	14	14	14	14	14	14	25.6	25.6	25.6	89.321	806	806	0	140.63	25.6	24594000	24594000	27				172	104;218;513;517;696;1099;1183;1193;1228;1253;1297;1533;1653;2378	True;True;True;True;True;True;True;True;True;True;True;True;True;True	105;224;530;536;721;1137;1221;1231;1267;1295;1339;1588;1713;2467	115;254;255;595;602;813;814;815;1271;1360;1370;1409;1443;1489;1490;1817;1967;1968;3001	186;426;427;428;953;954;969;1294;1295;1296;1992;1993;2103;2116;2177;2231;2296;2297;2854;2855;2856;3092;3093;3094;3095;3096;4789;4790	186;428;953;969;1296;1993;2103;2116;2177;2231;2296;2856;3096;4790	66	757
sp|P55084|ECHB_HUMAN	sp|P55084|ECHB_HUMAN	7	7	7	>sp|P55084|ECHB_HUMAN Trifunctional enzyme subunit beta, mitochondrial OS=Homo sapiens OX=9606 GN=HADHB PE=1 SV=3	1	7	7	7	7	7	7	18.4	18.4	18.4	51.294	474	474	0	44.877	18.4	13570000	13570000	8				173	149;400;439;1186;1238;1428;1635	True;True;True;True;True;True;True	154;414;454;1224;1279;1474;1695	176;467;510;1363;1422;1694;1943	298;753;816;2107;2195;2196;2662;3058	298;753;816;2107;2196;2662;3058
sp|P55209|NP1L1_HUMAN	sp|P55209|NP1L1_HUMAN	5	4	4	>sp|P55209|NP1L1_HUMAN Nucleosome assembly protein 1-like 1 OS=Homo sapiens OX=9606 GN=NAP1L1 PE=1 SV=1	1	5	4	4	5	4	4	21.2	18.7	18.7	45.374	391	391	0	37.138	21.2	5318900	5318900	5				174	559;620;714;1179;1221	True;False;True;True;True	578;642;739;1217;1260	647;722;723;833;1356;1402	1039;1040;1158;1159;1323;2099;2166;2167	1040;1158;1323;2099;2166
sp|P60174|TPIS_HUMAN	sp|P60174|TPIS_HUMAN	13	13	13	>sp|P60174|TPIS_HUMAN Triosephosphate isomerase OS=Homo sapiens OX=9606 GN=TPI1 PE=1 SV=3	1	13	13	13	13	13	13	65.7	65.7	65.7	30.791	286	286	0	155.99	65.7	77166000	77166000	30				175	309;466;886;911;978;1152;1720;1880;1964;2152;2314;2351;2369	True;True;True;True;True;True;True;True;True;True;True;True;True	318;481;915;940;1009;1190;1788;1955;2039;2235;2403;2440;2458	353;540;1029;1030;1057;1132;1328;2054;2055;2237;2331;2332;2551;2930;2970;2991	595;863;864;865;866;1616;1617;1653;1778;1779;1780;2066;3231;3232;3526;3527;3528;3529;3689;3690;3691;3692;3693;4045;4670;4671;4741;4742;4777;4778	595;864;1616;1653;1778;2066;3232;3528;3692;4045;4671;4742;4778
sp|P63261|ACTG_HUMAN;sp|P60709|ACTB_HUMAN;sp|Q6S8J3|POTEE_HUMAN;sp|A5A3E0|POTEF_HUMAN;sp|P0CG38|POTEI_HUMAN;sp|Q9BYX7|ACTBM_HUMAN;sp|P0CG39|POTEJ_HUMAN	sp|P63261|ACTG_HUMAN;sp|P60709|ACTB_HUMAN	22;22;9;7;6;4;4	22;22;9;7;6;4;4	11;11;4;2;2;2;2	>sp|P63261|ACTG_HUMAN Actin, cytoplasmic 2 OS=Homo sapiens OX=9606 GN=ACTG1 PE=1 SV=1;>sp|P60709|ACTB_HUMAN Actin, cytoplasmic 1 OS=Homo sapiens OX=9606 GN=ACTB PE=1 SV=1	7	22	22	11	22	22	11	64.5	64.5	39.7	41.792	375	375;375;1075;1075;1075;375;1038	0	323.31	64.5	736400000	736400000	74				176	84;225;226;274;356;358;379;380;459;462;601;808;866;1072;1091;1220;1504;1672;1673;1944;2111;2159	True;True;True;True;True;True;True;True;True;True;True;True;True;True;True;True;True;True;True;True;True;True	85;231;232;281;282;366;368;369;391;392;474;477;621;622;835;893;894;1109;1128;1259;1556;1737;1738;1739;2019;2191;2192;2243	94;263;264;265;315;316;410;413;414;439;440;532;536;694;695;942;1006;1007;1008;1243;1262;1400;1401;1779;1780;1996;1997;1998;1999;2305;2306;2307;2500;2501;2502;2503;2559;2560	156;157;158;159;441;442;443;444;445;536;537;538;539;540;541;542;543;544;545;668;672;673;674;718;719;720;721;847;848;854;855;856;1109;1110;1111;1112;1113;1114;1481;1482;1483;1576;1577;1578;1579;1580;1955;1956;1957;1978;2163;2164;2165;2796;2797;2798;3137;3138;3139;3140;3141;3142;3143;3641;3642;3643;3644;3645;3646;3963;3964;3965;3966;3967;3968;3969;3970;4058;4059;4060;4061	158;442;443;542;668;674;719;721;848;854;1114;1482;1580;1956;1978;2165;2798;3141;3143;3645;3965;4060	67;68;69;70;71	44;47;153;269;305
sp|P60953|CDC42_HUMAN	sp|P60953|CDC42_HUMAN	4	4	4	>sp|P60953|CDC42_HUMAN Cell division control protein 42 homolog OS=Homo sapiens OX=9606 GN=CDC42 PE=1 SV=2	1	4	4	4	4	4	4	27.7	27.7	27.7	21.258	191	191	0	29.156	27.7	10805000	10805000	5				177	1694;1971;2086;2465	True;True;True;True	1761;2046;2166;2555	2024;2339;2473;3098	3181;3701;3920;3921;4956	3181;3701;3921;4956
sp|P61019|RAB2A_HUMAN;sp|Q8WUD1|RAB2B_HUMAN	sp|P61019|RAB2A_HUMAN;sp|Q8WUD1|RAB2B_HUMAN	4;2	4;2	4;2	>sp|P61019|RAB2A_HUMAN Ras-related protein Rab-2A OS=Homo sapiens OX=9606 GN=RAB2A PE=1 SV=1;>sp|Q8WUD1|RAB2B_HUMAN Ras-related protein Rab-2B OS=Homo sapiens OX=9606 GN=RAB2B PE=1 SV=1	2	4	4	4	4	4	4	25.9	25.9	25.9	23.545	212	212;216	0	39.817	25.9	4170500	4170500	5				178	453;1023;1369;1960	True;True;True;True	468;1060;1414;2035	526;1191;1578;2327	841;1877;2435;2436;3682	841;1877;2436;3682
sp|P61158|ARP3_HUMAN;sp|Q9C0K3|ARP3C_HUMAN;sp|Q9P1U1|ARP3B_HUMAN	sp|P61158|ARP3_HUMAN	6;1;1	6;1;1	6;1;1	>sp|P61158|ARP3_HUMAN Actin-related protein 3 OS=Homo sapiens OX=9606 GN=ACTR3 PE=1 SV=3	3	6	6	6	6	6	6	22.7	22.7	22.7	47.371	418	418;210;418	0	40.109	22.7	5700500	5700500	8				179	344;391;1306;1354;1562;2066	True;True;True;True;True;True	354;404;1348;1399;1617;2145	395;453;1499;1561;1847;2449	651;652;736;2313;2412;2413;2905;3879	651;736;2313;2412;2905;3879
sp|P61586|RHOA_HUMAN;sp|P08134|RHOC_HUMAN;sp|P62745|RHOB_HUMAN	sp|P61586|RHOA_HUMAN;sp|P08134|RHOC_HUMAN	6;3;1	6;3;1	6;3;1	>sp|P61586|RHOA_HUMAN Transforming protein RhoA OS=Homo sapiens OX=9606 GN=RHOA PE=1 SV=1;>sp|P08134|RHOC_HUMAN Rho-related GTP-binding protein RhoC OS=Homo sapiens OX=9606 GN=RHOC PE=1 SV=1	3	6	6	6	6	6	6	35.2	35.2	35.2	21.768	193	193;193;196	0	71.651	35.2	9489800	9489800	6				180	335;521;823;946;1493;1732	True;True;True;True;True;True	345;540;850;975;1545;1800	386;606;958;1092;1768;2067	640;974;1508;1713;2782;2783;3249;3250	640;974;1508;1713;2782;3249
sp|P61604|CH10_HUMAN	sp|P61604|CH10_HUMAN	7	7	7	>sp|P61604|CH10_HUMAN 10 kDa heat shock protein, mitochondrial OS=Homo sapiens OX=9606 GN=HSPE1 PE=1 SV=2	1	7	7	7	7	7	7	73.5	73.5	73.5	10.932	102	102	0	74.247	73.5	147290000	147290000	18				181	692;721;1097;2289;2292;2370;2371	True;True;True;True;True;True;True	715;747;1135;2377;2380;2459;2460	803;804;842;843;1269;2901;2904;2905;2906;2992;2993;2994	1279;1280;1335;1336;1337;1338;1990;4627;4628;4629;4634;4635;4636;4637;4638;4779;4780;4781;4782	1280;1338;1990;4629;4635;4780;4782
sp|P61978|HNRPK_HUMAN	sp|P61978|HNRPK_HUMAN	9	9	9	>sp|P61978|HNRPK_HUMAN Heterogeneous nuclear ribonucleoprotein K OS=Homo sapiens OX=9606 GN=HNRNPK PE=1 SV=1	1	9	9	9	9	9	9	26.3	26.3	26.3	50.976	463	463	0	90.763	26.3	30850000	30850000	14				182	687;766;775;822;917;977;1001;1620;1988	True;True;True;True;True;True;True;True;True	710;792;802;849;946;1008;1034;1680;2063	795;894;904;957;1063;1131;1161;1927;2358	1262;1263;1410;1426;1507;1661;1662;1777;1827;1828;3032;3033;3034;3733	1263;1410;1426;1507;1662;1777;1827;3033;3733
sp|P62241|RS8_HUMAN	sp|P62241|RS8_HUMAN	6	6	6	>sp|P62241|RS8_HUMAN 40S ribosomal protein S8 OS=Homo sapiens OX=9606 GN=RPS8 PE=1 SV=2	1	6	6	6	6	6	6	36.1	36.1	36.1	24.205	208	208	0	63.185	36.1	20856000	20856000	9				183	36;965;1048;1182;1232;1412	True;True;True;True;True;True	36;994;1085;1220;1273;1458	41;1112;1113;1216;1359;1416;1678	66;1742;1743;1744;1909;1910;2102;2186;2641	66;1742;1910;2102;2186;2641
sp|P62249|RS16_HUMAN	sp|P62249|RS16_HUMAN	4	4	4	>sp|P62249|RS16_HUMAN 40S ribosomal protein S16 OS=Homo sapiens OX=9606 GN=RPS16 PE=1 SV=2	1	4	4	4	4	4	4	27.4	27.4	27.4	16.445	146	146	0	22.885	27.4	23040000	23040000	4				184	752;1961;2060;2304	True;True;True;True	778;2036;2138;2393	880;2328;2441;2919	1387;3683;3864;4655	1387;3683;3864;4655
sp|P62258|1433E_HUMAN	sp|P62258|1433E_HUMAN	7	7	6	>sp|P62258|1433E_HUMAN 14-3-3 protein epsilon OS=Homo sapiens OX=9606 GN=YWHAE PE=1 SV=1	1	7	7	6	7	7	6	29.8	29.8	26.7	29.174	255	255	0	46.333	29.8	13709000	13709000	8				185	18;399;847;1192;1580;2408;2439	True;True;True;True;True;True;True	18;413;874;1230;1635;2498;2529	19;466;985;1369;1871;3037;3071	30;751;752;1548;2115;2940;4854;4908	30;752;1548;2115;2940;4854;4908
sp|P62263|RS14_HUMAN	sp|P62263|RS14_HUMAN	5	5	5	>sp|P62263|RS14_HUMAN 40S ribosomal protein S14 OS=Homo sapiens OX=9606 GN=RPS14 PE=1 SV=3	1	5	5	5	5	5	5	33.1	33.1	33.1	16.273	151	151	0	39.58	33.1	16510000	16510000	8				186	46;928;957;2050;2087	True;True;True;True;True	46;957;986;2127;2167	54;1074;1103;2430;2474	84;1683;1684;1728;3845;3846;3922;3923	84;1684;1728;3846;3923
sp|P62424|RL7A_HUMAN	sp|P62424|RL7A_HUMAN	8	8	8	>sp|P62424|RL7A_HUMAN 60S ribosomal protein L7a OS=Homo sapiens OX=9606 GN=RPL7A PE=1 SV=2	1	8	8	8	8	8	8	33.5	33.5	33.5	29.995	266	266	0	52.983	33.5	24496000	24496000	10				187	98;891;1161;1177;1308;1548;1725;1973	True;True;True;True;True;True;True;True	99;920;1199;1215;1350;1603;1793;2048	108;1035;1337;1354;1501;1832;2060;2341	176;1624;2076;2097;2318;2883;2884;3238;3703;3704	176;1624;2076;2097;2318;2884;3238;3703
sp|P62701|RS4X_HUMAN;sp|P22090|RS4Y1_HUMAN;sp|Q8TD47|RS4Y2_HUMAN	sp|P62701|RS4X_HUMAN;sp|P22090|RS4Y1_HUMAN;sp|Q8TD47|RS4Y2_HUMAN	9;5;5	9;5;5	9;5;5	>sp|P62701|RS4X_HUMAN 40S ribosomal protein S4, X isoform OS=Homo sapiens OX=9606 GN=RPS4X PE=1 SV=2;>sp|P22090|RS4Y1_HUMAN 40S ribosomal protein S4, Y isoform 1 OS=Homo sapiens OX=9606 GN=RPS4Y1 PE=1 SV=2;>sp|Q8TD47|RS4Y2_HUMAN 40S ribosomal protein S4, Y	3	9	9	9	9	9	9	36.5	36.5	36.5	29.597	263	263;263;263	0	72.252	36.5	19817000	19817000	14				188	300;557;715;861;892;1409;1981;1982;2042	True;True;True;True;True;True;True;True;True	309;576;740;888;921;1455;2056;2057;2119	343;645;834;1001;1036;1674;2350;2351;2420	579;580;1036;1037;1324;1568;1569;1625;2634;3720;3721;3722;3723;3829;3830	580;1036;1324;1569;1625;2634;3722;3723;3830
sp|P62750|RL23A_HUMAN	sp|P62750|RL23A_HUMAN	5	5	5	>sp|P62750|RL23A_HUMAN 60S ribosomal protein L23a OS=Homo sapiens OX=9606 GN=RPL23A PE=1 SV=1	1	5	5	5	5	5	5	34	34	34	17.695	156	156	0	28.921	34	10678000	10678000	4				189	415;1202;1448;1566;2311	True;True;True;True;True	429;1240;1495;1621;2400	483;1380;1716;1852;2927	779;2133;2702;2910;4667	779;2133;2702;2910;4667
sp|P62753|RS6_HUMAN	sp|P62753|RS6_HUMAN	7	7	7	>sp|P62753|RS6_HUMAN 40S ribosomal protein S6 OS=Homo sapiens OX=9606 GN=RPS6 PE=1 SV=1	1	7	7	7	7	7	7	22.1	22.1	22.1	28.68	249	249	0	59.506	22.1	12466000	12466000	10				190	341;1104;1134;1463;1464;1564;1686	True;True;True;True;True;True;True	351;1142;1172;1510;1511;1619;1752	392;1276;1309;1731;1732;1849;1850;2012	647;1999;2045;2731;2732;2733;2734;2907;2908;3162	647;1999;2045;2731;2733;2908;3162
sp|P62820|RAB1A_HUMAN;sp|Q92928|RAB1C_HUMAN;sp|P51153|RAB13_HUMAN;sp|Q92930|RAB8B_HUMAN;sp|P61006|RAB8A_HUMAN;sp|P59190|RAB15_HUMAN	sp|P62820|RAB1A_HUMAN	7;2;1;1;1;1	7;2;1;1;1;1	3;0;0;0;0;0	>sp|P62820|RAB1A_HUMAN Ras-related protein Rab-1A OS=Homo sapiens OX=9606 GN=RAB1A PE=1 SV=3	6	7	7	3	7	7	3	50.7	50.7	24.4	22.677	205	205;201;203;207;207;212	0	77.989	50.7	24364000	24364000	16				191	432;539;631;1320;1481;1534;2403	True;True;True;True;True;True;True	446;558;653;1363;1531;1532;1589;2493	501;625;735;1518;1752;1753;1818;3032	803;804;1006;1007;1176;1177;2349;2761;2762;2763;2764;2765;2857;2858;4847;4848	803;1007;1176;2349;2764;2857;4847	72	176
sp|P62826|RAN_HUMAN	sp|P62826|RAN_HUMAN	9	9	9	>sp|P62826|RAN_HUMAN GTP-binding nuclear protein Ran OS=Homo sapiens OX=9606 GN=RAN PE=1 SV=3	1	9	9	9	9	9	9	38	38	38	24.423	216	216	0	57.783	38	27571000	27571000	10				192	594;851;1123;1583;1881;2169;2170;2171;2463	True;True;True;True;True;True;True;True;True	614;878;1161;1638;1956;2253;2254;2255;2553	686;989;1298;1874;2238;2757;2758;2759;3096	1095;1096;1553;2029;2944;2945;3530;4414;4415;4416;4954	1096;1553;2029;2945;3530;4414;4415;4416;4954
sp|P62917|RL8_HUMAN	sp|P62917|RL8_HUMAN	4	4	4	>sp|P62917|RL8_HUMAN 60S ribosomal protein L8 OS=Homo sapiens OX=9606 GN=RPL8 PE=1 SV=2	1	4	4	4	4	4	4	30	30	30	28.024	257	257	0	34.007	30	41511000	41511000	9				193	183;196;235;1989	True;True;True;True	188;201;242;2064	216;229;275;2359	364;365;366;367;385;386;460;3734;3735	366;385;460;3735
sp|P62937|PPIA_HUMAN;sp|Q9Y536|PAL4A_HUMAN;sp|P0DN26|PAL4F_HUMAN;sp|F5H284|PAL4D_HUMAN;sp|A0A0B4J2A2|PAL4C_HUMAN;sp|A0A075B767|PAL4H_HUMAN;sp|A0A075B759|PAL4E_HUMAN	sp|P62937|PPIA_HUMAN	9;1;1;1;1;1;1	9;1;1;1;1;1;1	9;1;1;1;1;1;1	>sp|P62937|PPIA_HUMAN Peptidyl-prolyl cis-trans isomerase A OS=Homo sapiens OX=9606 GN=PPIA PE=1 SV=2	7	9	9	9	9	9	9	70.3	70.3	70.3	18.012	165	165;164;164;164;164;164;164	0	106.46	70.3	154950000	154950000	23				194	676;879;973;1119;1849;1994;2265;2332;2333	True;True;True;True;True;True;True;True;True	698;907;908;1002;1003;1157;1924;2069;2352;2421;2422	782;1021;1022;1122;1123;1293;2200;2201;2364;2872;2873;2950;2951;2952	1245;1246;1600;1601;1602;1603;1758;1759;1760;1761;2022;2023;3469;3470;3742;4579;4580;4581;4706;4707;4708;4709;4710	1246;1603;1761;2023;3469;3742;4581;4706;4709	73;74	61;100
sp|P63241|IF5A1_HUMAN;sp|Q9GZV4|IF5A2_HUMAN;sp|Q6IS14|IF5AL_HUMAN	sp|P63241|IF5A1_HUMAN;sp|Q9GZV4|IF5A2_HUMAN;sp|Q6IS14|IF5AL_HUMAN	6;5;5	6;5;5	6;5;5	>sp|P63241|IF5A1_HUMAN Eukaryotic translation initiation factor 5A-1 OS=Homo sapiens OX=9606 GN=EIF5A PE=1 SV=2;>sp|Q9GZV4|IF5A2_HUMAN Eukaryotic translation initiation factor 5A-2 OS=Homo sapiens OX=9606 GN=EIF5A2 PE=1 SV=3;>sp|Q6IS14|IF5AL_HUMAN Eukaryot	3	6	6	6	6	6	6	31.2	31.2	31.2	16.832	154	154;153;154	0	36.421	31.2	14015000	14015000	6				195	426;1180;1181;2238;2239;2411	True;True;True;True;True;True	440;1218;1219;2324;2325;2501	495;1357;1358;2838;2839;3041	793;2100;2101;4533;4534;4858	793;2100;2101;4533;4534;4858
sp|P63244|RACK1_HUMAN	sp|P63244|RACK1_HUMAN	6	6	6	>sp|P63244|RACK1_HUMAN Receptor of activated protein C kinase 1 OS=Homo sapiens OX=9606 GN=RACK1 PE=1 SV=3	1	6	6	6	6	6	6	31.9	31.9	31.9	35.076	317	317	0	51.397	31.9	14002000	14002000	9				196	57;321;386;702;1444;2462	True;True;True;True;True;True	57;330;399;727;1490;2552	66;366;448;821;1711;3095	103;104;105;614;730;1305;2692;4952;4953	103;614;730;1305;2692;4952
sp|P67809|YBOX1_HUMAN;sp|Q9Y2T7|YBOX2_HUMAN	sp|P67809|YBOX1_HUMAN	13;3	13;3	9;0	>sp|P67809|YBOX1_HUMAN Nuclease-sensitive element-binding protein 1 OS=Homo sapiens OX=9606 GN=YBX1 PE=1 SV=3	2	13	13	9	13	13	9	50.3	50.3	42.9	35.924	324	324;364	0	149.03	50.3	27654000	27654000	23				197	8;424;425;626;1539;1540;1557;1637;1638;1772;1773;1934;1935	True;True;True;True;True;True;True;True;True;True;True;True;True	8;438;439;648;1594;1595;1612;1697;1698;1842;1843;2009;2010	8;493;494;730;1823;1824;1841;1945;1946;2111;2112;2294;2295	12;789;790;791;792;1168;2865;2866;2867;2868;2897;3060;3061;3062;3063;3314;3315;3316;3317;3318;3618;3619;3620	12;790;792;1168;2867;2868;2897;3060;3061;3316;3318;3618;3620
sp|P68104|EF1A1_HUMAN;sp|Q5VTE0|EF1A3_HUMAN;sp|Q05639|EF1A2_HUMAN	sp|P68104|EF1A1_HUMAN;sp|Q5VTE0|EF1A3_HUMAN;sp|Q05639|EF1A2_HUMAN	14;13;7	14;13;7	14;13;7	>sp|P68104|EF1A1_HUMAN Elongation factor 1-alpha 1 OS=Homo sapiens OX=9606 GN=EEF1A1 PE=1 SV=1;>sp|Q5VTE0|EF1A3_HUMAN Putative elongation factor 1-alpha-like 3 OS=Homo sapiens OX=9606 GN=EEF1A1P5 PE=5 SV=1;>sp|Q05639|EF1A2_HUMAN Elongation factor 1-alpha 2	3	14	14	14	14	14	14	53	53	53	50.14	462	462;462;463	0	120.29	53	227100000	227100000	38				198	951;958;1360;1536;1588;1701;1730;1822;1931;2028;2201;2412;2470;2471	True;True;True;True;True;True;True;True;True;True;True;True;True;True	980;987;1405;1591;1644;1768;1798;1894;1895;2006;2104;2286;2287;2502;2560;2561	1097;1104;1567;1568;1569;1820;1882;2031;2065;2165;2166;2291;2403;2794;2795;3042;3043;3103;3104	1718;1719;1720;1729;2419;2420;2421;2861;2957;2958;2959;3193;3246;3394;3395;3396;3397;3398;3399;3400;3401;3402;3606;3607;3608;3792;3793;4466;4467;4468;4469;4470;4471;4472;4859;4860;4962;4963	1720;1729;2420;2861;2957;3193;3246;3398;3608;3793;4471;4859;4962;4963	75;76	276;410
sp|P68363|TBA1B_HUMAN;sp|P0DPH8|TBA3D_HUMAN;sp|P0DPH7|TBA3C_HUMAN;sp|Q71U36|TBA1A_HUMAN;sp|P68366|TBA4A_HUMAN;sp|Q9BQE3|TBA1C_HUMAN;sp|Q6PEY2|TBA3E_HUMAN;sp|Q9NY65|TBA8_HUMAN	sp|P68363|TBA1B_HUMAN;sp|P0DPH8|TBA3D_HUMAN;sp|P0DPH7|TBA3C_HUMAN;sp|Q71U36|TBA1A_HUMAN;sp|P68366|TBA4A_HUMAN;sp|Q9BQE3|TBA1C_HUMAN;sp|Q6PEY2|TBA3E_HUMAN;sp|Q9NY65|TBA8_HUMAN	8;7;7;7;6;5;5;4	8;7;7;7;6;5;5;4	8;7;7;7;6;5;5;4	>sp|P68363|TBA1B_HUMAN Tubulin alpha-1B chain OS=Homo sapiens OX=9606 GN=TUBA1B PE=1 SV=1;>sp|P0DPH8|TBA3D_HUMAN Tubulin alpha-3D chain OS=Homo sapiens OX=9606 GN=TUBA3D PE=1 SV=1;>sp|P0DPH7|TBA3C_HUMAN Tubulin alpha-3C chain OS=Homo sapiens OX=9606 GN=TUB	8	8	8	8	8	8	8	31.7	31.7	31.7	50.151	451	451;450;450;451;448;449;450;449	0	115.44	31.7	30595000	30595000	15				199	77;220;239;387;1700;1845;2037;2224	True;True;True;True;True;True;True;True	77;226;246;400;1767;1920;2114;2310	86;257;258;279;449;2030;2196;2415;2823	145;146;431;432;464;731;732;3191;3192;3460;3461;3819;3820;4511;4512	146;431;464;731;3191;3460;3820;4512	77	302
sp|P68371|TBB4B_HUMAN;sp|P04350|TBB4A_HUMAN;sp|Q9BUF5|TBB6_HUMAN	sp|P68371|TBB4B_HUMAN;sp|P04350|TBB4A_HUMAN	17;12;5	17;12;5	3;2;0	>sp|P68371|TBB4B_HUMAN Tubulin beta-4B chain OS=Homo sapiens OX=9606 GN=TUBB4B PE=1 SV=1;>sp|P04350|TBB4A_HUMAN Tubulin beta-4A chain OS=Homo sapiens OX=9606 GN=TUBB4A PE=1 SV=2	3	17	17	3	17	17	3	43.8	43.8	7	49.83	445	445;444;446	0	190.46	43.8	72006000	72006000	37				200	233;460;516;595;703;704;1007;1013;1034;1215;1283;1506;1511;1589;1617;1831;2443	True;True;True;True;True;True;True;True;True;True;True;True;True;True;True;True;True	239;240;475;534;535;615;728;729;1041;1048;1071;1254;1325;1558;1564;1565;1645;1677;1905;2533	272;273;533;534;600;601;687;822;823;1168;1176;1202;1395;1475;1782;1790;1791;1883;1924;2180;3075	456;457;458;849;850;851;965;966;967;968;1097;1306;1307;1308;1309;1837;1838;1839;1854;1855;1892;2156;2272;2800;2801;2819;2820;2821;2960;2961;3027;3028;3029;3431;3432;3433;3434;4913	456;849;967;1097;1306;1308;1839;1855;1892;2156;2272;2801;2820;2961;3029;3433;4913	78;79;80;81	73;300;323;330
sp|P78371|TCPB_HUMAN	sp|P78371|TCPB_HUMAN	5	5	5	>sp|P78371|TCPB_HUMAN T-complex protein 1 subunit beta OS=Homo sapiens OX=9606 GN=CCT2 PE=1 SV=4	1	5	5	5	5	5	5	16.4	16.4	16.4	57.488	535	535	0	37.832	16.4	7691300	7691300	8				201	81;305;637;1199;1702	True;True;True;True;True	81;314;659;1237;1769	90;349;742;1377;2032	151;588;1189;1190;2126;2127;3194;3195	151;588;1190;2127;3194
sp|Q00610|CLH1_HUMAN;sp|P53675|CLH2_HUMAN	sp|Q00610|CLH1_HUMAN	17;2	17;2	17;2	>sp|Q00610|CLH1_HUMAN Clathrin heavy chain 1 OS=Homo sapiens OX=9606 GN=CLTC PE=1 SV=5	2	17	17	17	17	17	17	15.5	15.5	15.5	191.61	1675	1675;1640	0	128.36	15.5	19710000	19710000	19				202	73;407;600;959;1038;1066;1075;1098;1191;1207;1236;1321;1334;2105;2186;2254;2416	True;True;True;True;True;True;True;True;True;True;True;True;True;True;True;True;True	73;421;620;988;1075;1103;1112;1136;1229;1245;1277;1364;1378;2185;2271;2341;2506	82;474;693;1105;1206;1237;1246;1270;1368;1386;1420;1519;1537;2493;2777;2861;3047	139;763;1108;1730;1898;1944;1945;1960;1991;2114;2141;2142;2193;2350;2375;3955;4437;4566;4867	139;763;1108;1730;1898;1945;1960;1991;2114;2142;2193;2350;2375;3955;4437;4566;4867
sp|Q00839|HNRPU_HUMAN	sp|Q00839|HNRPU_HUMAN	11	11	11	>sp|Q00839|HNRPU_HUMAN Heterogeneous nuclear ribonucleoprotein U OS=Homo sapiens OX=9606 GN=HNRNPU PE=1 SV=6	1	11	11	11	11	11	11	21	21	21	90.583	825	825	0	91.229	21	28511000	28511000	17				203	339;373;464;809;1082;1364;1383;1466;1549;1908;1972	True;True;True;True;True;True;True;True;True;True;True	349;385;479;836;1119;1409;1429;1513;1604;1983;2047	390;433;538;943;1253;1573;1593;1594;1734;1833;2266;2340	644;710;711;858;859;1484;1485;1968;2429;2456;2457;2458;2459;2736;2885;3572;3702	644;710;859;1484;1968;2429;2458;2736;2885;3572;3702
sp|Q01082|SPTB2_HUMAN	sp|Q01082|SPTB2_HUMAN	6	6	6	>sp|Q01082|SPTB2_HUMAN Spectrin beta chain, non-erythrocytic 1 OS=Homo sapiens OX=9606 GN=SPTBN1 PE=1 SV=2	1	6	6	6	6	6	6	3.8	3.8	3.8	274.61	2364	2364	0	50.43	3.8	4230400	4230400	8				204	456;560;867;1068;1433;1957	True;True;True;True;True;True	471;579;895;1105;1479;2032	529;648;1009;1239;1700;2324	844;1041;1581;1582;1583;1950;2675;3679	844;1041;1583;1950;2675;3679
sp|Q01581|HMCS1_HUMAN;sp|P54868|HMCS2_HUMAN	sp|Q01581|HMCS1_HUMAN	9;1	9;1	9;1	>sp|Q01581|HMCS1_HUMAN Hydroxymethylglutaryl-CoA synthase, cytoplasmic OS=Homo sapiens OX=9606 GN=HMGCS1 PE=1 SV=2	2	9	9	9	9	9	9	29	29	29	57.293	520	520;508	0	75.366	29	12186000	12186000	14				205	201;1242;1355;1497;1774;2022;2354;2355;2459	True;True;True;True;True;True;True;True;True	206;1283;1400;1549;1844;2098;2443;2444;2549	235;1426;1562;1772;2113;2397;2973;2974;3092	398;2202;2414;2789;3319;3320;3321;3784;4746;4747;4748;4749;4750;4949	398;2202;2414;2789;3319;3784;4746;4749;4949
sp|Q02413|DSG1_HUMAN	sp|Q02413|DSG1_HUMAN	5	5	5	>sp|Q02413|DSG1_HUMAN Desmoglein-1 OS=Homo sapiens OX=9606 GN=DSG1 PE=1 SV=2	1	5	5	5	5	5	5	7.9	7.9	7.9	113.75	1049	1049	0	45.064	7.9	6173100	6173100	8				206	138;767;961;2073;2450	True;True;True;True;True	143;793;794;990;2152;2540	165;895;896;1108;2457;3083	280;1411;1412;1413;1734;1735;3893;3894;4932	280;1413;1734;3893;4932	82;83;84	133;221;249
sp|Q02878|RL6_HUMAN	sp|Q02878|RL6_HUMAN	7	7	7	>sp|Q02878|RL6_HUMAN 60S ribosomal protein L6 OS=Homo sapiens OX=9606 GN=RPL6 PE=1 SV=3	1	7	7	7	7	7	7	20.5	20.5	20.5	32.728	288	288	0	56.5	20.5	15860000	15860000	13				207	199;850;864;865;2274;2467;2468	True;True;True;True;True;True;True	204;877;891;892;2362;2557;2558	232;233;988;1004;1005;2885;3100;3101	389;390;391;392;393;1552;1573;1574;1575;4599;4958;4959;4960	391;1552;1573;1575;4599;4959;4960
sp|Q06830|PRDX1_HUMAN	sp|Q06830|PRDX1_HUMAN	11	11	8	>sp|Q06830|PRDX1_HUMAN Peroxiredoxin-1 OS=Homo sapiens OX=9606 GN=PRDX1 PE=1 SV=1	1	11	11	8	11	11	8	63.3	63.3	51.8	22.11	199	199	0	83.346	63.3	65001000	65001000	18				208	34;204;725;726;827;1150;1341;1430;1682;1692;2034	True;True;True;True;True;True;True;True;True;True;True	34;209;751;752;854;1188;1386;1476;1748;1759;2111	39;239;847;848;849;963;1326;1546;1696;2008;2021;2412	62;63;403;404;1342;1343;1344;1345;1346;1517;1518;2064;2389;2390;2664;2665;3153;3177;3816	62;404;1343;1346;1518;2064;2390;2664;3153;3177;3816
sp|Q07021|C1QBP_HUMAN	sp|Q07021|C1QBP_HUMAN	5	5	5	>sp|Q07021|C1QBP_HUMAN Complement component 1 Q subcomponent-binding protein, mitochondrial OS=Homo sapiens OX=9606 GN=C1QBP PE=1 SV=1	1	5	5	5	5	5	5	31.6	31.6	31.6	31.362	282	282	0	86.546	31.6	18327000	18327000	18				209	76;148;527;1509;2196	True;True;True;True;True	76;153;546;1562;2281	85;175;612;1788;2788;2789	144;291;292;293;294;295;296;297;981;982;983;984;2816;2817;4455;4456;4457;4458	144;295;984;2817;4456
sp|Q07065|CKAP4_HUMAN	sp|Q07065|CKAP4_HUMAN	4	4	4	>sp|Q07065|CKAP4_HUMAN Cytoskeleton-associated protein 4 OS=Homo sapiens OX=9606 GN=CKAP4 PE=1 SV=2	1	4	4	4	4	4	4	9.1	9.1	9.1	66.022	602	602	0	25.512	9.1	2966300	2966300	4				210	934;1367;1680;2322	True;True;True;True	963;1412;1746;2411	1080;1576;2006;2939	1697;2433;3151;4687	1697;2433;3151;4687
sp|Q09666|AHNK_HUMAN	sp|Q09666|AHNK_HUMAN	24	24	24	>sp|Q09666|AHNK_HUMAN Neuroblast differentiation-associated protein AHNAK OS=Homo sapiens OX=9606 GN=AHNAK PE=1 SV=2	1	24	24	24	24	24	24	10.5	10.5	10.5	629.09	5890	5890	0	159.64	10.5	31826000	31826000	27				211	42;53;478;655;656;697;819;925;981;1042;1043;1044;1045;1467;1472;1473;2182;2183;2191;2193;2197;2220;2234;2312	True;True;True;True;True;True;True;True;True;True;True;True;True;True;True;True;True;True;True;True;True;True;True;True	42;53;493;677;678;722;846;954;1012;1079;1080;1081;1082;1514;1521;1522;2267;2268;2276;2278;2282;2306;2320;2401	48;49;61;554;760;761;816;953;1071;1137;1210;1211;1212;1213;1735;1742;1743;2773;2774;2782;2785;2790;2816;2833;2928	76;77;95;96;884;1216;1217;1297;1501;1679;1680;1791;1902;1903;1904;1905;2737;2747;2748;4433;4434;4446;4450;4451;4459;4501;4525;4668	77;95;884;1216;1217;1297;1501;1680;1791;1902;1903;1904;1905;2737;2747;2748;4433;4434;4446;4450;4459;4501;4525;4668
sp|Q12931|TRAP1_HUMAN	sp|Q12931|TRAP1_HUMAN	12	12	12	>sp|Q12931|TRAP1_HUMAN Heat shock protein 75 kDa, mitochondrial OS=Homo sapiens OX=9606 GN=TRAP1 PE=1 SV=3	1	12	12	12	12	12	12	20.6	20.6	20.6	80.109	704	704	0	96.021	20.6	16717000	16717000	17				212	72;182;442;472;476;817;840;1434;1802;1882;1883;2417	True;True;True;True;True;True;True;True;True;True;True;True	72;187;457;487;491;844;867;1480;1873;1957;1958;2507	81;215;513;546;550;951;978;1701;2144;2239;2240;3048	136;137;138;362;363;823;873;879;880;1497;1540;2676;2677;2678;3366;3531;3532;4868	137;362;823;873;879;1497;1540;2677;3366;3531;3532;4868
sp|Q13162|PRDX4_HUMAN	sp|Q13162|PRDX4_HUMAN	7	5	5	>sp|Q13162|PRDX4_HUMAN Peroxiredoxin-4 OS=Homo sapiens OX=9606 GN=PRDX4 PE=1 SV=1	1	7	5	5	7	5	5	32.1	27.7	27.7	30.54	271	271	0	35.593	32.1	10348000	10348000	10				213	430;725;726;1041;1431;1844;2098	True;False;False;True;True;True;True	444;751;752;1078;1477;1919;2178	499;847;848;849;1209;1697;2195;2486	800;1342;1343;1344;1345;1346;1901;2666;2667;2668;3456;3457;3458;3459;3944	800;1343;1346;1901;2668;3459;3944
sp|Q13200|PSMD2_HUMAN	sp|Q13200|PSMD2_HUMAN	6	6	6	>sp|Q13200|PSMD2_HUMAN 26S proteasome non-ATPase regulatory subunit 2 OS=Homo sapiens OX=9606 GN=PSMD2 PE=1 SV=3	1	6	6	6	6	6	6	10.6	10.6	10.6	100.2	908	908	0	37.294	10.6	2360500	2360500	10				214	55;172;346;537;568;1501	True;True;True;True;True;True	55;177;356;556;587;1553	63;202;397;623;656;1776	98;99;100;336;654;1003;1004;1051;1052;2793	100;336;654;1004;1051;2793
sp|Q13813|SPTN1_HUMAN	sp|Q13813|SPTN1_HUMAN	6	6	6	>sp|Q13813|SPTN1_HUMAN Spectrin alpha chain, non-erythrocytic 1 OS=Homo sapiens OX=9606 GN=SPTAN1 PE=1 SV=3	1	6	6	6	6	6	6	4	4	4	284.54	2472	2472	0	36.149	4	2945900	2945900	4				215	129;863;1257;1293;1607;1962	True;True;True;True;True;True	132;890;1299;1335;1665;2037	146;1003;1448;1485;1909;2329	235;1572;2238;2288;3003;3684;3685	235;1572;2238;2288;3003;3684
sp|Q14103|HNRPD_HUMAN	sp|Q14103|HNRPD_HUMAN	7	7	6	>sp|Q14103|HNRPD_HUMAN Heterogeneous nuclear ribonucleoprotein D0 OS=Homo sapiens OX=9606 GN=HNRNPD PE=1 SV=1	1	7	7	6	7	7	6	23.9	23.9	21.7	38.434	355	355	0	47.359	23.9	18583000	18583000	9				216	565;566;672;871;944;1031;1477	True;True;True;True;True;True;True	584;585;694;899;973;1068;1527	653;654;777;1013;1090;1199;1748	1046;1047;1048;1049;1239;1240;1588;1711;1889;2757	1046;1049;1239;1588;1711;1889;2757
sp|Q14247|SRC8_HUMAN	sp|Q14247|SRC8_HUMAN	8	8	8	>sp|Q14247|SRC8_HUMAN Src substrate cortactin OS=Homo sapiens OX=9606 GN=CTTN PE=1 SV=2	1	8	8	8	8	8	8	19.8	19.8	19.8	61.585	550	550	0	59.221	19.8	13394000	13394000	9				217	154;193;243;813;1363;1794;1795;2189	True;True;True;True;True;True;True;True	159;198;250;840;1408;1865;1866;2274	181;226;283;947;1572;2135;2136;2780	305;380;381;470;1492;2428;3349;3350;4444	305;380;470;1492;2428;3349;3350;4444
sp|Q14677|EPN4_HUMAN	sp|Q14677|EPN4_HUMAN	4	4	4	>sp|Q14677|EPN4_HUMAN Clathrin interactor 1 OS=Homo sapiens OX=9606 GN=CLINT1 PE=1 SV=1	1	4	4	4	4	4	4	7.5	7.5	7.5	68.259	625	625	0	26.854	7.5	2224500	2224500	3				218	213;1867;1898;2035	True;True;True;True	218;1942;1973;2112	248;2223;2255;2413	418;3506;3556;3817	418;3506;3556;3817
sp|Q14697|GANAB_HUMAN	sp|Q14697|GANAB_HUMAN	19	19	19	>sp|Q14697|GANAB_HUMAN Neutral alpha-glucosidase AB OS=Homo sapiens OX=9606 GN=GANAB PE=1 SV=3	1	19	19	19	19	19	19	28.7	28.7	28.7	106.87	944	944	0	181.03	28.7	55387000	55387000	36				219	68;302;303;319;365;563;602;1309;1402;1455;1500;1604;1737;1748;1969;1970;2340;2455;2456	True;True;True;True;True;True;True;True;True;True;True;True;True;True;True;True;True;True;True	68;311;312;328;377;582;623;1351;1448;1502;1552;1662;1806;1817;2044;2045;2429;2545;2546	77;346;347;364;423;651;696;1502;1666;1723;1775;1905;2073;2084;2085;2337;2338;2959;3088;3089	131;584;585;586;612;689;690;691;1044;1115;1116;1117;2319;2620;2621;2715;2716;2717;2792;2998;2999;3257;3258;3259;3260;3273;3274;3698;3699;3700;4722;4723;4939;4940;4941;4942	131;584;586;612;690;1044;1115;2319;2620;2716;2792;2999;3259;3273;3699;3700;4723;4939;4941
sp|Q14974|IMB1_HUMAN	sp|Q14974|IMB1_HUMAN	13	13	13	>sp|Q14974|IMB1_HUMAN Importin subunit beta-1 OS=Homo sapiens OX=9606 GN=KPNB1 PE=1 SV=2	1	13	13	13	13	13	13	18.9	18.9	18.9	97.169	876	876	0	107.09	18.9	26628000	26628000	20				220	24;381;633;645;1188;1373;1615;1644;2113;2143;2144;2272;2324	True;True;True;True;True;True;True;True;True;True;True;True;True	24;393;655;667;1226;1419;1675;1704;2194;2226;2227;2360;2413	27;441;737;738;750;1365;1583;1922;1955;2506;2542;2543;2883;2941	44;722;1182;1183;1184;1185;1202;1203;2110;2111;2442;2443;3025;3073;3976;4036;4037;4595;4596;4689	44;722;1184;1203;2111;2443;3025;3073;3976;4036;4037;4596;4689
sp|Q14978|NOLC1_HUMAN	sp|Q14978|NOLC1_HUMAN	4	4	4	>sp|Q14978|NOLC1_HUMAN Nucleolar and coiled-body phosphoprotein 1 OS=Homo sapiens OX=9606 GN=NOLC1 PE=1 SV=2	1	4	4	4	4	4	4	11.9	11.9	11.9	73.602	699	699	0	25.262	11.9	1494700	1494700	10				221	9;20;1079;1714	True;True;True;True	9;20;1116;1781	9;21;1250;2044	13;14;15;16;32;33;1965;3210;3211;3212	14;32;1965;3212
sp|Q15084|PDIA6_HUMAN	sp|Q15084|PDIA6_HUMAN	13	13	13	>sp|Q15084|PDIA6_HUMAN Protein disulfide-isomerase A6 OS=Homo sapiens OX=9606 GN=PDIA6 PE=1 SV=1	1	13	13	13	13	13	13	36.6	36.6	36.6	48.121	440	440	0	124.87	36.6	45965000	45965000	26				222	124;125;664;774;941;1189;1574;1575;1968;2009;2010;2211;2266	True;True;True;True;True;True;True;True;True;True;True;True;True	127;128;686;801;970;1227;1629;1630;2043;2085;2086;2297;2353	140;141;142;769;903;1087;1366;1863;1864;2336;2383;2384;2385;2806;2874	223;224;225;226;227;228;229;230;1226;1227;1228;1423;1424;1425;1704;1705;2112;2931;2932;3697;3764;3765;3766;3767;4487;4582	224;228;1227;1425;1704;2112;2931;2932;3697;3764;3767;4487;4582
sp|Q15181|IPYR_HUMAN	sp|Q15181|IPYR_HUMAN	4	4	4	>sp|Q15181|IPYR_HUMAN Inorganic pyrophosphatase OS=Homo sapiens OX=9606 GN=PPA1 PE=1 SV=2	1	4	4	4	4	4	4	28.4	28.4	28.4	32.66	289	289	0	32.451	28.4	7334600	7334600	7				223	764;878;1305;2243	True;True;True;True	790;906;1347;2329	892;1020;1498;2843	1407;1408;1597;1598;1599;2312;4539;4540	1407;1597;2312;4540
sp|Q15365|PCBP1_HUMAN	sp|Q15365|PCBP1_HUMAN	7	7	4	>sp|Q15365|PCBP1_HUMAN Poly(rC)-binding protein 1 OS=Homo sapiens OX=9606 GN=PCBP1 PE=1 SV=2	1	7	7	4	7	7	4	30.9	30.9	19.9	37.497	356	356	0	42.951	30.9	18756000	18756000	9				224	280;500;906;1012;1443;1678;1709	True;True;True;True;True;True;True	288;515;935;1047;1489;1744;1776	322;578;1050;1175;1710;2004;2039	552;925;1641;1642;1643;1852;1853;2691;3149;3203	552;925;1641;1852;2691;3149;3203
sp|Q15393|SF3B3_HUMAN	sp|Q15393|SF3B3_HUMAN	4	4	4	>sp|Q15393|SF3B3_HUMAN Splicing factor 3B subunit 3 OS=Homo sapiens OX=9606 GN=SF3B3 PE=1 SV=4	1	4	4	4	4	4	4	4.4	4.4	4.4	135.58	1217	1217	0	32.198	4.4	3429000	3429000	5				225	93;836;1503;2126	True;True;True;True	94;863;1555;2207	103;974;1778;2521	170;1534;1535;2795;3998;3999	170;1535;2795;3999
sp|Q15436|SC23A_HUMAN	sp|Q15436|SC23A_HUMAN	4	4	4	>sp|Q15436|SC23A_HUMAN Protein transport protein Sec23A OS=Homo sapiens OX=9606 GN=SEC23A PE=1 SV=2	1	4	4	4	4	4	4	8.6	8.6	8.6	86.16	765	765	0	33.425	8.6	2879400	2879400	8				226	755;848;921;1523	True;True;True;True	781;875;950;1577	883;986;1067;1806	1390;1391;1392;1549;1667;1668;1669;2839	1391;1549;1669;2839
sp|Q15648|MED1_HUMAN	sp|Q15648|MED1_HUMAN	5	5	5	>sp|Q15648|MED1_HUMAN Mediator of RNA polymerase II transcription subunit 1 OS=Homo sapiens OX=9606 GN=MED1 PE=1 SV=4	1	5	5	5	5	5	5	5.2	5.2	5.2	168.48	1581	1581	0	39.01	5.2	2914900	2914900	8				227	785;856;1400;1901;1915	True;True;True;True;True	812;883;1446;1976;1990	917;996;1664;2258;2274	1441;1442;1562;2617;2618;3559;3580;3581	1442;1562;2618;3559;3580
sp|Q16555|DPYL2_HUMAN	sp|Q16555|DPYL2_HUMAN	4	4	4	>sp|Q16555|DPYL2_HUMAN Dihydropyrimidinase-related protein 2 OS=Homo sapiens OX=9606 GN=DPYSL2 PE=1 SV=1	1	4	4	4	4	4	4	8.4	8.4	8.4	62.293	572	572	0	32.35	8.4	4324500	4324500	5				228	740;772;1518;1905	True;True;True;True	766;799;1572;1980	868;901;1799;2263	1372;1420;1421;2830;3566	1372;1421;2830;3566
sp|Q16576|RBBP7_HUMAN;sp|Q09028|RBBP4_HUMAN	sp|Q16576|RBBP7_HUMAN	5;1	5;1	5;1	>sp|Q16576|RBBP7_HUMAN Histone-binding protein RBBP7 OS=Homo sapiens OX=9606 GN=RBBP7 PE=1 SV=1	2	5	5	5	5	5	5	20	20	20	47.82	425	425;425	0	33.19	20	5019600	5019600	4				229	390;485;859;950;2118	True;True;True;True;True	403;500;886;979;2199	452;561;999;1096;2512	735;894;1566;1717;3987	735;894;1566;1717;3987
sp|Q5T2W1|NHRF3_HUMAN;sp|A8MUH7|PDZ1P_HUMAN	sp|Q5T2W1|NHRF3_HUMAN;sp|A8MUH7|PDZ1P_HUMAN	5;4	5;4	5;4	>sp|Q5T2W1|NHRF3_HUMAN Na(+)/H(+) exchange regulatory cofactor NHE-RF3 OS=Homo sapiens OX=9606 GN=PDZK1 PE=1 SV=2;>sp|A8MUH7|PDZ1P_HUMAN Putative PDZ domain-containing protein PDZK1P1 OS=Homo sapiens OX=9606 GN=PDZK1P1 PE=5 SV=2	2	5	5	5	5	5	5	13.3	13.3	13.3	57.129	519	519;402	0	34.892	13.3	5589000	5589000	8				230	90;340;660;1195;2299	True;True;True;True;True	91;350;682;1233;2387	100;391;765;1372;2913	166;645;646;1221;2118;2119;2120;4646	166;646;1221;2118;4646
sp|Q5T749|KPRP_HUMAN	sp|Q5T749|KPRP_HUMAN	6	6	6	>sp|Q5T749|KPRP_HUMAN Keratinocyte proline-rich protein OS=Homo sapiens OX=9606 GN=KPRP PE=1 SV=1	1	6	6	6	6	6	6	16.8	16.8	16.8	64.135	579	579	0	62.252	16.8	8748600	8748600	10				231	207;276;606;932;1777;2103	True;True;True;True;True;True	212;284;627;961;1847;2183	242;318;706;1078;2116;2491	407;408;548;1136;1137;1693;1694;1695;3324;3325;3953	407;548;1137;1694;3325;3953
sp|Q6P1L8|RM14_HUMAN	sp|Q6P1L8|RM14_HUMAN	9	9	9	>sp|Q6P1L8|RM14_HUMAN 39S ribosomal protein L14, mitochondrial OS=Homo sapiens OX=9606 GN=MRPL14 PE=1 SV=1	1	9	9	9	9	9	9	53.8	53.8	53.8	15.947	145	145	0	144.95	53.8	91476000	91476000	18				232	130;556;1084;2089;2213;2214;2270;2330;2366	True;True;True;True;True;True;True;True;True	133;575;1121;2169;2299;2300;2358;2419;2455	147;148;644;1255;2476;2808;2809;2881;2947;2948;2987;2988	236;237;238;1034;1035;1970;3926;3927;3928;4489;4490;4491;4593;4697;4698;4699;4771;4772	238;1034;1970;3926;4489;4491;4593;4697;4771
sp|Q6YN16|HSDL2_HUMAN	sp|Q6YN16|HSDL2_HUMAN	5	5	5	>sp|Q6YN16|HSDL2_HUMAN Hydroxysteroid dehydrogenase-like protein 2 OS=Homo sapiens OX=9606 GN=HSDL2 PE=1 SV=1	1	5	5	5	5	5	5	17.7	17.7	17.7	45.394	418	418	0	39.539	17.7	6890000	6890000	8				233	320;1169;1316;1820;2153	True;True;True;True;True	329;1207;1359;1892;2236	365;1345;1513;2163;2552	613;2085;2086;2087;2339;3391;4046;4047	613;2086;2339;3391;4046
sp|Q7KZF4|SND1_HUMAN	sp|Q7KZF4|SND1_HUMAN	7	7	7	>sp|Q7KZF4|SND1_HUMAN Staphylococcal nuclease domain-containing protein 1 OS=Homo sapiens OX=9606 GN=SND1 PE=1 SV=1	1	7	7	7	7	7	7	9.6	9.6	9.6	102	910	910	0	49.35	9.6	4457000	4457000	10				234	397;403;505;1278;1386;2146;2259	True;True;True;True;True;True;True	411;417;520;1320;1432;2229;2346	464;470;584;585;1470;1597;2545;2866	749;756;757;934;935;936;2266;2463;4039;4572	749;756;935;2266;2463;4039;4572
sp|Q8NBS9|TXND5_HUMAN	sp|Q8NBS9|TXND5_HUMAN	7	7	7	>sp|Q8NBS9|TXND5_HUMAN Thioredoxin domain-containing protein 5 OS=Homo sapiens OX=9606 GN=TXNDC5 PE=1 SV=2	1	7	7	7	7	7	7	20.6	20.6	20.6	47.628	432	432	0	43.661	20.6	14792000	14792000	8				235	119;435;535;807;900;2175;2177	True;True;True;True;True;True;True	121;449;554;834;929;2259;2261	134;504;621;941;1044;2763;2765	216;807;998;1480;1634;1635;4423;4425	216;807;998;1480;1634;4423;4425
sp|Q92841|DDX17_HUMAN;sp|P17844|DDX5_HUMAN	sp|Q92841|DDX17_HUMAN;sp|P17844|DDX5_HUMAN	4;2	4;2	4;2	>sp|Q92841|DDX17_HUMAN Probable ATP-dependent RNA helicase DDX17 OS=Homo sapiens OX=9606 GN=DDX17 PE=1 SV=2;>sp|P17844|DDX5_HUMAN Probable ATP-dependent RNA helicase DDX5 OS=Homo sapiens OX=9606 GN=DDX5 PE=1 SV=1	2	4	4	4	4	4	4	6.4	6.4	6.4	80.272	729	729;614	0	26.439	6.4	1996300	1996300	4				236	165;1120;1550;1914	True;True;True;True	170;1158;1605;1989	194;1294;1834;2273	327;2024;2886;3579	327;2024;2886;3579
sp|Q92896|GSLG1_HUMAN	sp|Q92896|GSLG1_HUMAN	6	6	6	>sp|Q92896|GSLG1_HUMAN Golgi apparatus protein 1 OS=Homo sapiens OX=9606 GN=GLG1 PE=1 SV=2	1	6	6	6	6	6	6	6.6	6.6	6.6	134.55	1179	1179	0	38.343	6.6	6007200	6007200	6				237	297;546;1190;1397;1735;1923	True;True;True;True;True;True	306;565;1228;1443;1803;1998	340;632;1367;1608;2070;2283	576;1016;1017;2113;2479;3253;3594	576;1017;2113;2479;3253;3594
sp|Q92945|FUBP2_HUMAN	sp|Q92945|FUBP2_HUMAN	10	10	9	>sp|Q92945|FUBP2_HUMAN Far upstream element-binding protein 2 OS=Homo sapiens OX=9606 GN=KHSRP PE=1 SV=4	1	10	10	9	10	10	9	21.8	21.8	20.7	73.114	711	711	0	77.908	21.8	12391000	12391000	19				238	109;690;773;956;1028;1484;1697;1940;2107;2325	True;True;True;True;True;True;True;True;True;True	110;713;800;985;1065;1536;1764;2015;2187;2414	121;801;902;1102;1196;1757;2027;2300;2495;2942	195;1277;1422;1726;1727;1884;1885;1886;2770;3185;3186;3187;3628;3629;3630;3631;3957;4690;4691	195;1277;1422;1727;1886;2770;3185;3631;3957;4691
sp|Q96AE4|FUBP1_HUMAN;sp|Q96I24|FUBP3_HUMAN	sp|Q96AE4|FUBP1_HUMAN	6;1	5;0	5;0	>sp|Q96AE4|FUBP1_HUMAN Far upstream element-binding protein 1 OS=Homo sapiens OX=9606 GN=FUBP1 PE=1 SV=3	2	6	5	5	6	5	5	10.9	9.6	9.6	67.56	644	644;572	0	40.312	10.9	5308000	5308000	7				239	952;1027;1028;1769;1799;1848	True;True;False;True;True;True	981;1064;1065;1839;1870;1923	1098;1195;1196;2108;2140;2199	1721;1722;1883;1884;1885;1886;3309;3356;3357;3358;3468	1721;1883;1886;3309;3357;3468
sp|Q99536|VAT1_HUMAN	sp|Q99536|VAT1_HUMAN	5	5	5	>sp|Q99536|VAT1_HUMAN Synaptic vesicle membrane protein VAT-1 homolog OS=Homo sapiens OX=9606 GN=VAT1 PE=1 SV=2	1	5	5	5	5	5	5	19.8	19.8	19.8	41.92	393	393	0	37.339	19.8	5459800	5459800	11				240	815;1376;1642;2122;2138	True;True;True;True;True	842;1422;1702;2203;2220	949;1586;1952;1953;2517;2536	1494;1495;2446;2447;2448;3070;3071;3993;4027;4028;4029	1495;2447;3071;3993;4028
sp|Q99729|ROAA_HUMAN	sp|Q99729|ROAA_HUMAN	4	4	4	>sp|Q99729|ROAA_HUMAN Heterogeneous nuclear ribonucleoprotein A/B OS=Homo sapiens OX=9606 GN=HNRNPAB PE=1 SV=2	1	4	4	4	4	4	4	14.5	14.5	14.5	36.224	332	332	0	33.062	14.5	7219200	7219200	4				241	532;670;682;1478	True;True;True;True	551;692;705;1528	618;775;790;1749	991;1235;1236;1256;2758	991;1236;1256;2758
sp|Q99733|NP1L4_HUMAN	sp|Q99733|NP1L4_HUMAN	5	5	4	>sp|Q99733|NP1L4_HUMAN Nucleosome assembly protein 1-like 4 OS=Homo sapiens OX=9606 GN=NAP1L4 PE=1 SV=1	1	5	5	4	5	5	4	16.8	16.8	14.1	42.823	375	375	0	39.305	16.8	8833100	8833100	9				242	4;620;1225;1404;1734	True;True;True;True;True	4;642;1264;1450;1802	4;722;723;1406;1668;2069	6;7;1158;1159;2172;2173;2174;2624;3252	7;1158;2173;2624;3252
sp|Q99798|ACON_HUMAN	sp|Q99798|ACON_HUMAN	6	6	6	>sp|Q99798|ACON_HUMAN Aconitate hydratase, mitochondrial OS=Homo sapiens OX=9606 GN=ACO2 PE=1 SV=2	1	6	6	6	6	6	6	12.2	12.2	12.2	85.424	780	780	0	56.613	12.2	8835900	8835900	9				243	1071;1895;2148;2157;2225;2395	True;True;True;True;True;True	1108;1970;2231;2241;2311;2484	1242;2252;2547;2557;2824;3021	1954;3551;3552;4041;4055;4056;4513;4826;4827	1954;3551;4041;4055;4513;4827
sp|Q99829|CPNE1_HUMAN	sp|Q99829|CPNE1_HUMAN	4	4	4	>sp|Q99829|CPNE1_HUMAN Copine-1 OS=Homo sapiens OX=9606 GN=CPNE1 PE=1 SV=1	1	4	4	4	4	4	4	14.9	14.9	14.9	59.058	537	537	0	40.202	14.9	4168600	4168600	9				244	312;410;1450;2375	True;True;True;True	321;424;1497;2464	356;477;478;1718;2998	598;599;767;768;769;770;771;2705;4786	598;768;2705;4786
sp|Q99832|TCPH_HUMAN	sp|Q99832|TCPH_HUMAN	8	8	8	>sp|Q99832|TCPH_HUMAN T-complex protein 1 subunit eta OS=Homo sapiens OX=9606 GN=CCT7 PE=1 SV=2	1	8	8	8	8	8	8	18.6	18.6	18.6	59.366	543	543	0	72.587	18.6	6206500	6206500	12				245	211;278;684;1010;1011;1359;1696;1965	True;True;True;True;True;True;True;True	216;286;707;1045;1046;1404;1763;2040	246;320;792;1173;1174;1566;2026;2333	415;416;550;1259;1847;1848;1849;1850;1851;2418;3184;3694	416;550;1259;1847;1850;2418;3184;3694
sp|Q9BWD1|THIC_HUMAN	sp|Q9BWD1|THIC_HUMAN	4	4	4	>sp|Q9BWD1|THIC_HUMAN Acetyl-CoA acetyltransferase, cytosolic OS=Homo sapiens OX=9606 GN=ACAT2 PE=1 SV=2	1	4	4	4	4	4	4	20.2	20.2	20.2	41.35	397	397	0	38.036	20.2	10498000	10498000	10				246	215;831;1003;1307	True;True;True;True	220;858;1036;1349	250;968;1163;1500	420;421;422;1525;1526;1830;2314;2315;2316;2317	421;1526;1830;2316
sp|Q9HDC9|APMAP_HUMAN	sp|Q9HDC9|APMAP_HUMAN	4	4	4	>sp|Q9HDC9|APMAP_HUMAN Adipocyte plasma membrane-associated protein OS=Homo sapiens OX=9606 GN=APMAP PE=1 SV=2	1	4	4	4	4	4	4	15.6	15.6	15.6	46.48	416	416	0	29.524	15.6	4288500	4288500	10				247	596;1237;1322;1770	True;True;True;True	616;1278;1365;1840	688;1421;1520;2109	1098;1099;1100;1101;2194;2351;2352;3310;3311;3312	1100;2194;2351;3312
sp|Q9NSE4|SYIM_HUMAN	sp|Q9NSE4|SYIM_HUMAN	8	8	8	>sp|Q9NSE4|SYIM_HUMAN Isoleucine--tRNA ligase, mitochondrial OS=Homo sapiens OX=9606 GN=IARS2 PE=1 SV=2	1	8	8	8	8	8	8	10.8	10.8	10.8	113.79	1012	1012	0	56.201	10.8	9569300	9569300	13				248	229;1713;1801;1947;1954;2047;2125;2458	True;True;True;True;True;True;True;True	235;1780;1872;2022;2029;2124;2206;2548	268;2043;2142;2143;2310;2319;2425;2426;2520;3091	449;3209;3363;3364;3365;3649;3661;3839;3840;3997;4946;4947;4948	449;3209;3363;3649;3661;3840;3997;4947
sp|Q9NYU2|UGGG1_HUMAN	sp|Q9NYU2|UGGG1_HUMAN	6	6	6	>sp|Q9NYU2|UGGG1_HUMAN UDP-glucose:glycoprotein glucosyltransferase 1 OS=Homo sapiens OX=9606 GN=UGGT1 PE=1 SV=3	1	6	6	6	6	6	6	4.4	4.4	4.4	177.19	1555	1555	0	36.281	4.4	5981900	5981900	6				249	458;611;938;991;1264;1967	True;True;True;True;True;True	473;632;967;1023;1306;2042	531;711;1084;1149;1456;2335	846;1143;1701;1809;2249;3696	846;1143;1701;1809;2249;3696
sp|Q9NZI8|IF2B1_HUMAN	sp|Q9NZI8|IF2B1_HUMAN	5	5	5	>sp|Q9NZI8|IF2B1_HUMAN Insulin-like growth factor 2 mRNA-binding protein 1 OS=Homo sapiens OX=9606 GN=IGF2BP1 PE=1 SV=2	1	5	5	5	5	5	5	13	13	13	63.48	577	577	0	38.017	13	5811700	5811700	5				250	111;1051;1453;1715;2129	True;True;True;True;True	112;1088;1500;1782;2210	124;1219;1721;2045;2524	200;1913;2712;3213;4005	200;1913;2712;3213;4005
sp|Q9P2E9|RRBP1_HUMAN	sp|Q9P2E9|RRBP1_HUMAN	16	16	16	>sp|Q9P2E9|RRBP1_HUMAN Ribosome-binding protein 1 OS=Homo sapiens OX=9606 GN=RRBP1 PE=1 SV=5	1	16	16	16	16	16	16	25.5	25.5	25.5	152.45	1410	1410	0	119.52	25.5	38254000	38254000	19				251	14;15;52;299;301;490;525;746;844;1081;1102;1170;1171;1172;1622;1840	True;True;True;True;True;True;True;True;True;True;True;True;True;True;True;True	14;15;52;308;310;505;544;772;871;1118;1140;1208;1209;1210;1682;1915	14;15;16;60;342;344;345;566;610;874;982;1252;1274;1346;1347;1348;1929;2191	24;25;26;94;578;581;582;583;902;979;1380;1545;1967;1997;2088;2089;2090;3038;3451	24;26;94;578;582;902;979;1380;1545;1967;1997;2088;2089;2090;3038;3451
sp|Q9UHG3|PCYOX_HUMAN	sp|Q9UHG3|PCYOX_HUMAN	9	9	9	>sp|Q9UHG3|PCYOX_HUMAN Prenylcysteine oxidase 1 OS=Homo sapiens OX=9606 GN=PCYOX1 PE=1 SV=3	1	9	9	9	9	9	9	22.8	22.8	22.8	56.639	505	505	0	66.31	22.8	12230000	12230000	12				252	169;461;902;920;943;1416;1804;2390;2453	True;True;True;True;True;True;True;True;True	174;476;931;949;972;1462;1875;2479;2543	199;535;1046;1066;1089;1682;2146;3015;3086	332;852;853;1637;1666;1709;1710;2645;3368;4814;4815;4936	332;852;1637;1666;1710;2645;3368;4814;4936
sp|Q9UKM9|RALY_HUMAN	sp|Q9UKM9|RALY_HUMAN	5	5	5	>sp|Q9UKM9|RALY_HUMAN RNA-binding protein Raly OS=Homo sapiens OX=9606 GN=RALY PE=1 SV=1	1	5	5	5	5	5	5	21.6	21.6	21.6	32.463	306	306	0	35.743	21.6	26637000	26637000	5				253	25;800;1365;2203;2269	True;True;True;True;True	25;827;1410;2289;2357	28;933;1574;2797;2879;2880	45;1468;2430;4475;4591;4592	45;1468;2430;4475;4591
sp|Q9ULV4|COR1C_HUMAN	sp|Q9ULV4|COR1C_HUMAN	4	4	4	>sp|Q9ULV4|COR1C_HUMAN Coronin-1C OS=Homo sapiens OX=9606 GN=CORO1C PE=1 SV=1	1	4	4	4	4	4	4	9.7	9.7	9.7	53.248	474	474	0	26.694	9.7	9405200	9405200	3				254	105;723;1147;1537	True;True;True;True	106;749;1185;1592	116;845;1323;1821	187;1340;2061;2862;2863	187;1340;2061;2863
sp|Q9UQ80|PA2G4_HUMAN	sp|Q9UQ80|PA2G4_HUMAN	5	5	5	>sp|Q9UQ80|PA2G4_HUMAN Proliferation-associated protein 2G4 OS=Homo sapiens OX=9606 GN=PA2G4 PE=1 SV=3	1	5	5	5	5	5	5	17.3	17.3	17.3	43.786	394	394	0	31.778	17.3	6947700	6947700	6				255	132;642;1056;1425;1479	True;True;True;True;True	135;664;1093;1471;1529	150;747;1224;1691;1750	240;1197;1198;1919;2659;2759	240;1197;1919;2659;2759
sp|Q9Y490|TLN1_HUMAN	sp|Q9Y490|TLN1_HUMAN	7	7	7	>sp|Q9Y490|TLN1_HUMAN Talin-1 OS=Homo sapiens OX=9606 GN=TLN1 PE=1 SV=3	1	7	7	7	7	7	7	4.8	4.8	4.8	269.76	2541	2541	0	43.987	4.8	3909400	3909400	10				256	21;122;286;788;1465;1651;2298	True;True;True;True;True;True;True	21;125;294;815;1512;1711;2386	22;23;138;328;920;1733;1964;2912	34;35;220;221;560;1445;1446;2735;3087;4645	34;220;560;1446;2735;3087;4645
sp|Q9Y624|JAM1_HUMAN	sp|Q9Y624|JAM1_HUMAN	6	6	6	>sp|Q9Y624|JAM1_HUMAN Junctional adhesion molecule A OS=Homo sapiens OX=9606 GN=F11R PE=1 SV=1	1	6	6	6	6	6	6	33.8	33.8	33.8	32.583	299	299	0	46.15	33.8	11337000	11337000	11				257	232;555;1050;1298;1384;2262	True;True;True;True;True;True	238;574;1087;1340;1430;2349	271;642;643;1218;1491;1595;2869	453;454;455;1031;1032;1033;1912;2298;2299;2460;4576	454;1031;1912;2298;2460;4576

## Sheet: proteinGroups_Caco-2 control
Protein IDs	Majority protein IDs	Peptide counts (all)	Peptide counts (razor+unique)	Peptide counts (unique)	Fasta headers	Number of proteins	Peptides	Razor + unique peptides	Unique peptides	Peptides PC_CACO2_EXPSPIKE1_15GIU2021.raw	Razor + unique peptides PC_CACO2_EXPSPIKE1_15GIU2021.raw	Unique peptides PC_CACO2_EXPSPIKE1_15GIU2021.raw	Sequence coverage [%]	Unique + razor sequence coverage [%]	Unique sequence coverage [%]	Mol. weight [kDa]	Sequence length	Sequence lengths	Q-value	Score	Sequence coverage PC_CACO2_EXPSPIKE1_15GIU2021.raw [%]	Intensity	Intensity PC_CACO2_EXPSPIKE1_15GIU2021.raw	LFQ intensity PC_CACO2_EXPSPIKE1_15GIU2021.raw	MS/MS Count PC_CACO2_EXPSPIKE1_15GIU2021.raw	MS/MS Count	Only identified by site	Reverse	Potential contaminant	id	Peptide IDs	Peptide is razor	Mod. peptide IDs	Evidence IDs	MS/MS IDs	Best MS/MS	Oxidation (M) site IDs	Oxidation (M) site positions
CON__ENSEMBL:ENSBTAP00000024466;CON__ENSEMBL:ENSBTAP00000024462	CON__ENSEMBL:ENSBTAP00000024466;CON__ENSEMBL:ENSBTAP00000024462	14;12	14;12	14;12	>ENSEMBL:ENSBTAP00000024466 (Bos taurus) 44 kDa protein;>ENSEMBL:ENSBTAP00000024462 (Bos taurus) 47 kDa protein	2	14	14	14	14	14	14	52.1	52.1	52.1	43.9	401	401;419	0	147.44	52.1	192240000	192240000	186490000	39	39			+	0	161;256;350;451;784;785;1164;1228;1478;1492;1575;1709;1814;1854	True;True;True;True;True;True;True;True;True;True;True;True;True;True	163;265;362;467;813;814;1210;1278;1539;1540;1554;1640;1783;1888;1929	190;191;192;193;313;314;417;556;557;946;947;1401;1488;1767;1768;1783;1882;2124;2240;2287	320;321;322;323;324;325;326;327;517;518;519;520;521;676;677;678;915;916;917;1508;1509;2261;2262;2410;2851;2852;2853;2879;2880;2881;2882;3052;3425;3426;3427;3601;3602;3603;3604;3605;3685;3686	326;520;678;915;1508;1509;2262;2410;2853;2881;3052;3426;3604;3686	0	32
CON__P00761	CON__P00761	6	6	6	>P00761 SWISS-PROT:P00761|TRYP_PIG Trypsin - Sus scrofa (Pig).	1	6	6	6	6	6	6	32.9	32.9	32.9	24.409	231	231	0	173.24	32.9	7017100000	7017100000	6709000000	160	160			+	1	735;960;1065;1066;1371;1663	True;True;True;True;True;True	758;759;993;1103;1104;1429;1734	880;881;882;883;1144;1145;1261;1262;1263;1264;1265;1266;1267;1268;1269;1270;1271;1272;1273;1274;1275;1276;1277;1278;1279;1280;1281;1282;1283;1284;1285;1648;1988;1989;1990;1991;1992;1993;1994;1995;1996;1997;1998;1999;2000;2001;2002;2003;2004;2005;2006;2007;2008;2009;2010;2011;2012;2013;2014;2015;2016;2017;2018;2019;2020;2021;2022;2023;2024;2025;2026;2027;2028;2029;2030;2031;2032;2033;2034;2035;203…	1407;1408;1409;1410;1411;1412;1413;1414;1415;1814;1815;1816;1817;2017;2018;2019;2020;2021;2022;2023;2024;2025;2026;2027;2028;2029;2030;2031;2032;2033;2034;2035;2036;2037;2038;2039;2040;2041;2042;2043;2044;2045;2046;2047;2048;2049;2050;2051;2052;2053;2054;2055;2056;2057;2058;2059;2060;2061;2062;2063;2064;2065;2066;2651;3219;3220;3221;3222;3223;3224;3225;3226;3227;3228;3229;3230;3231;3232;3233;3234…	1415;1817;2024;2066;2651;3229	1	94
CON__P02662	CON__P02662	4	4	4	>P02662 SWISS-PROT:P02662 Alpha-S1-casein - Bos taurus (Bovine).	1	4	4	4	4	4	4	24.1	24.1	24.1	22.975	199	199	0	32.323	24.1	55966000	55966000	55966000	7	7			+	2	405;628;653;1873	True;True;True;True	419;650;675;1948	480;757;758;784;785;2307	767;1215;1216;1217;1249;1250;3713;3714	767;1216;1249;3714
CON__P02668	CON__P02668	5	5	5	>P02668 SWISS-PROT:P02668 Kappa-casein [Contains: Casoxin C; Casoxin 6; Casoxin A; Casoxin B; Casoplatelin] - Bos taurus (Bovine).	1	5	5	5	5	5	5	32.5	32.5	32.5	18.974	169	169	0	48.817	32.5	11129000	11129000	11129000	4	4			+	3	1267;1268;1374;1459;1866	True;True;True;True;True	1319;1320;1432;1520;1941	1534;1535;1651;1747;2300	2475;2476;2477;2478;2479;2654;2820;2821;3705	2476;2479;2654;2821;3705
CON__P02754	CON__P02754	6	6	6	>P02754 SWISS-PROT:P02754 Beta-lactoglobulin - Bos taurus (Bovine).	1	6	6	6	6	6	6	51.9	51.9	51.9	18.281	162	162	0	135.24	51.9	19873000	19873000	19873000	10	10			+	4	1058;1603;1604;1655;1753;1815	True;True;True;True;True;True	1096;1668;1669;1726;1827;1889	1254;1915;1916;1979;2171;2241	2004;2005;3109;3110;3201;3202;3203;3204;3493;3606	2005;3109;3110;3203;3493;3606
CON__P02769	CON__P02769	14	14	13	>P02769 SWISS-PROT:P02769 (Bos taurus) Bovine serum albumin precursor	1	14	14	13	14	14	13	29.3	29.3	27.8	69.293	607	607	0	130.24	29.3	27259000	27259000	27259000	21	21			+	5	145;146;171;420;641;964;990;1302;1336;1410;1411;1442;1862;1879	True;True;True;True;True;True;True;True;True;True;True;True;True;True	147;148;175;434;663;997;1023;1357;1393;1470;1471;1502;1937;1954	170;171;206;496;771;1149;1176;1575;1612;1693;1694;1728;2296;2314	284;285;286;348;349;788;1234;1235;1236;1823;1874;2541;2542;2599;2725;2726;2727;2788;3700;3701;3722;3723	284;286;349;788;1235;1823;1874;2542;2599;2725;2726;2788;3701;3723
CON__P12763	CON__P12763	5	5	3	>P12763 SWISS-PROT:P12763 (Bos taurus) Alpha-2-HS-glycoprotein precursor	1	5	5	3	5	5	3	17.8	17.8	14.2	38.418	359	359	0	33.096	17.8	5179100	5179100	5179100	13	13			+	6	109;147;148;664;1304	True;True;True;True;True	111;149;150;687;1359	128;129;172;173;799;1577	216;217;218;219;220;221;222;287;288;289;290;1268;2544	217;287;288;1268;2544
CON__Q05B55	CON__Q05B55	7	7	7	>Q05B55 TREMBL:Q05B55 (Bos taurus) Similar to Ig kappa chain C region	1	7	7	7	7	7	7	29.6	29.6	29.6	26.59	240	240	0	70.753	29.6	39135000	39135000	39135000	10	10			+	7	886;1376;1493;1674;1675;1821;1822	True;True;True;True;True;True;True	915;1434;1555;1745;1746;1895;1896	1057;1654;1784;1785;2079;2080;2249;2250	1679;2660;2883;2884;3347;3348;3349;3621;3622;3623	1679;2660;2884;3347;3349;3621;3623
CON__Q1RMN8	CON__Q1RMN8	5	5	5	>Q1RMN8 TREMBL:Q1RMN8 (Bos taurus) Similar to Immunoglobulin lambda-like polypeptide 1	1	5	5	5	5	5	5	28.6	28.6	28.6	24.536	234	234	0	126.58	28.6	50741000	50741000	50741000	19	19			+	8	129;587;1428;1776;1829	True;True;True;True;True	131;607;1488;1850;1903	150;151;707;708;1712;2197;2257	255;256;257;258;259;260;1135;1136;1137;1138;1139;1140;2759;2760;2761;3533;3534;3635;3636	259;1139;2760;3534;3636
sp|O00268|TAF4_HUMAN	sp|O00268|TAF4_HUMAN	4	4	4	>sp|O00268|TAF4_HUMAN Transcription initiation factor TFIID subunit 4 OS=Homo sapiens OX=9606 GN=TAF4 PE=1 SV=2	1	4	4	4	4	4	4	5.8	5.8	5.8	110.11	1085	1085	0	27.936	5.8	3208800	3208800	3208800	6	6				9	341;343;467;1317	True;True;True;True	352;354;483;1373	407;409;573;1592	658;661;662;937;938;2568	658;661;938;2568
sp|O00592|PODXL_HUMAN	sp|O00592|PODXL_HUMAN	4	4	4	>sp|O00592|PODXL_HUMAN Podocalyxin OS=Homo sapiens OX=9606 GN=PODXL PE=1 SV=2	1	4	4	4	4	4	4	11.5	11.5	11.5	58.635	558	558	0	28.543	11.5	7022400	7022400	7022400	6	6				10	127;150;922;1069	True;True;True;True	129;152;951;1107	148;175;1095;1288	253;292;1733;2069;2070;2071	253;292;1733;2069
sp|O14745|NHRF1_HUMAN	sp|O14745|NHRF1_HUMAN	4	4	4	>sp|O14745|NHRF1_HUMAN Na(+)/H(+) exchange regulatory cofactor NHE-RF1 OS=Homo sapiens OX=9606 GN=SLC9A3R1 PE=1 SV=4	1	4	4	4	4	4	4	20.1	20.1	20.1	38.868	358	358	0	29.864	20.1	4220600	4220600	4220600	6	6				11	105;819;1022;1080	True;True;True;True	107;848;1057;1118	122;986;1212;1300	206;207;1573;1926;1927;2090	207;1573;1926;2090
sp|O14908|GIPC1_HUMAN	sp|O14908|GIPC1_HUMAN	4	4	4	>sp|O14908|GIPC1_HUMAN PDZ domain-containing protein GIPC1 OS=Homo sapiens OX=9606 GN=GIPC1 PE=1 SV=2	1	4	4	4	4	4	4	23.7	23.7	23.7	36.049	333	333	0	28.142	23.7	4484700	4484700	4484700	8	8				12	524;857;1043;1081	True;True;True;True	541;886;1080;1119	634;1025;1237;1301	1029;1631;1632;1975;2091;2092;2093;2094	1029;1632;1975;2093
sp|O15047|SET1A_HUMAN	sp|O15047|SET1A_HUMAN	12	12	12	>sp|O15047|SET1A_HUMAN Histone-lysine N-methyltransferase SETD1A OS=Homo sapiens OX=9606 GN=SETD1A PE=1 SV=3	1	12	12	12	12	12	12	10.7	10.7	10.7	186.03	1707	1707	0	88.309	10.7	12535000	12535000	12535000	19	19				13	380;421;443;716;901;1192;1295;1341;1355;1386;1728;1872	True;True;True;True;True;True;True;True;True;True;True;True	393;435;458;739;930;1238;1350;1398;1412;1444;1802;1947	451;497;524;857;1073;1437;1568;1617;1631;1664;2144;2306	725;789;841;1372;1373;1374;1375;1698;2316;2530;2531;2606;2628;2672;2673;2674;2675;2676;3456;3712	725;789;841;1375;1698;2316;2531;2606;2628;2673;3456;3712	2	797
sp|O43169|CYB5B_HUMAN	sp|O43169|CYB5B_HUMAN	6	6	6	>sp|O43169|CYB5B_HUMAN Cytochrome b5 type B OS=Homo sapiens OX=9606 GN=CYB5B PE=1 SV=3	1	6	6	6	6	6	6	56	56	56	16.694	150	150	0	55.087	56	60376000	60376000	60376000	10	10				14	344;429;573;1224;1322;1810	True;True;True;True;True;True	355;443;593;1274;1378;1884	410;508;509;693;1484;1597;2236	663;815;816;817;818;1114;1115;2403;2577;3596	663;817;1114;2403;2577;3596
sp|O43707|ACTN4_HUMAN;sp|P12814|ACTN1_HUMAN;sp|P35609|ACTN2_HUMAN	sp|O43707|ACTN4_HUMAN	7;2;1	7;2;1	7;2;1	>sp|O43707|ACTN4_HUMAN Alpha-actinin-4 OS=Homo sapiens OX=9606 GN=ACTN4 PE=1 SV=2	3	7	7	7	7	7	7	12	12	12	104.85	911	911;892;894	0	44.44	12	5420800	5420800	5420800	6	6				15	541;763;849;916;1095;1108;1731	True;True;True;True;True;True;True	560;791;878;945;1133;1146;1805	658;919;1016;1089;1320;1334;2147	1064;1466;1615;1726;2123;2149;3460	1064;1466;1615;1726;2123;2149;3460
sp|O43809|CPSF5_HUMAN	sp|O43809|CPSF5_HUMAN	4	4	4	>sp|O43809|CPSF5_HUMAN Cleavage and polyadenylation specificity factor subunit 5 OS=Homo sapiens OX=9606 GN=NUDT21 PE=1 SV=1	1	4	4	4	4	4	4	29.5	29.5	29.5	26.227	227	227	0	34.179	29.5	7317400	7317400	7317400	8	8				16	949;1036;1076;1868	True;True;True;True	981;1073;1114;1943	1129;1230;1296;2302	1781;1962;1963;2081;2082;2083;2084;3707	1781;1962;2083;3707
sp|O60506|HNRPQ_HUMAN	sp|O60506|HNRPQ_HUMAN	4	4	3	>sp|O60506|HNRPQ_HUMAN Heterogeneous nuclear ribonucleoprotein Q OS=Homo sapiens OX=9606 GN=SYNCRIP PE=1 SV=2	1	4	4	3	4	4	3	8.8	8.8	6.9	69.602	623	623	0	27.105	8.8	3596600	3596600	3596600	4	4				17	244;1027;1553;1653	True;True;True;True	252;1063;1618;1724	299;1219;1857;1977	497;498;1939;3004;3198	498;1939;3004;3198
sp|O75643|U520_HUMAN	sp|O75643|U520_HUMAN	5	5	5	>sp|O75643|U520_HUMAN U5 small nuclear ribonucleoprotein 200 kDa helicase OS=Homo sapiens OX=9606 GN=SNRNP200 PE=1 SV=2	1	5	5	5	5	5	5	4.2	4.2	4.2	244.5	2136	2136	0	33.543	4.2	2267500	2267500	2267500	6	6				18	93;371;614;1826;1832	True;True;True;True;True	95;384;636;1900;1907	108;440;441;742;2254;2263	184;707;708;1193;3631;3645	184;708;1193;3631;3645
sp|O75694|NU155_HUMAN	sp|O75694|NU155_HUMAN	4	4	4	>sp|O75694|NU155_HUMAN Nuclear pore complex protein Nup155 OS=Homo sapiens OX=9606 GN=NUP155 PE=1 SV=1	1	4	4	4	4	4	4	5.1	5.1	5.1	155.2	1391	1391	0	27.699	5.1	2209000	2209000	2209000	5	5				19	324;905;909;1000	True;True;True;True	334;934;938;1034	388;389;1077;1081;1187	627;628;1703;1709;1887	628;1703;1709;1887
sp|O94925|GLSK_HUMAN	sp|O94925|GLSK_HUMAN	5	5	5	>sp|O94925|GLSK_HUMAN Glutaminase kidney isoform, mitochondrial OS=Homo sapiens OX=9606 GN=GLS PE=1 SV=1	1	5	5	5	5	5	5	12	12	12	73.46	669	669	0	36.131	12	4778900	4778900	4778900	7	7				20	194;195;449;535;1283	True;True;True;True;True	199;200;465;554;1336	231;232;531;652;1552	381;382;383;384;385;850;1056;2506	382;385;850;1056;2506
sp|O95573|ACSL3_HUMAN;sp|O60488|ACSL4_HUMAN	sp|O95573|ACSL3_HUMAN	4;1	4;1	4;1	>sp|O95573|ACSL3_HUMAN Long-chain-fatty-acid--CoA ligase 3 OS=Homo sapiens OX=9606 GN=ACSL3 PE=1 SV=3	2	4	4	4	4	4	4	7.4	7.4	7.4	80.419	720	720;711	0	26.531	7.4	2784500	2784500	2784500	8	8				21	714;1062;1562;1690	True;True;True;True	737;1100;1627;1763	855;1258;1869;2099	1368;1369;2010;2011;3029;3030;3382;3383	1369;2011;3030;3383
sp|P00338|LDHA_HUMAN	sp|P00338|LDHA_HUMAN	4	4	3	>sp|P00338|LDHA_HUMAN L-lactate dehydrogenase A chain OS=Homo sapiens OX=9606 GN=LDHA PE=1 SV=2	1	4	4	3	4	4	3	17.8	17.8	14.2	36.688	332	332	0	29.524	17.8	5555200	5555200	5555200	9	9				22	814;1007;1713;1790	True;True;True;True	843;1041;1787;1864	978;979;1194;1195;2128;2213	1559;1560;1899;1900;1901;1902;3431;3432;3563	1560;1902;3432;3563
sp|P00367|DHE3_HUMAN;sp|P49448|DHE4_HUMAN	sp|P00367|DHE3_HUMAN;sp|P49448|DHE4_HUMAN	27;17	27;17	27;17	>sp|P00367|DHE3_HUMAN Glutamate dehydrogenase 1, mitochondrial OS=Homo sapiens OX=9606 GN=GLUD1 PE=1 SV=2;>sp|P49448|DHE4_HUMAN Glutamate dehydrogenase 2, mitochondrial OS=Homo sapiens OX=9606 GN=GLUD2 PE=1 SV=2	2	27	27	27	27	27	27	53	53	53	61.397	558	558;558	0	290.95	53	219170000	219170000	219170000	38	38				23	71;74;157;184;208;248;334;455;479;511;623;720;721;725;798;846;1047;1138;1191;1242;1247;1327;1333;1506;1540;1813;1893	True;True;True;True;True;True;True;True;True;True;True;True;True;True;True;True;True;True;True;True;True;True;True;True;True;True;True	72;75;159;189;214;256;257;345;471;495;527;528;645;743;744;748;827;875;1084;1183;1184;1237;1292;1297;1383;1389;1569;1605;1887;1968	77;78;82;185;220;247;303;304;305;400;561;586;619;620;751;752;862;863;864;869;960;961;1013;1241;1373;1374;1436;1502;1507;1602;1608;1799;1843;1844;2239;2329	123;124;125;130;131;310;311;370;406;503;504;505;506;647;921;957;1002;1003;1004;1005;1006;1208;1209;1210;1383;1384;1385;1386;1392;1393;1525;1526;1527;1528;1612;1981;2217;2218;2315;2432;2433;2441;2583;2592;2901;2902;2981;2982;2983;2984;3600;3746	124;131;311;370;406;505;647;921;957;1006;1210;1383;1385;1392;1527;1612;1981;2218;2315;2433;2441;2583;2592;2901;2984;3600;3746	3;4;5;6	69;168;226;468
sp|P00387|NB5R3_HUMAN	sp|P00387|NB5R3_HUMAN	8	8	8	>sp|P00387|NB5R3_HUMAN NADH-cytochrome b5 reductase 3 OS=Homo sapiens OX=9606 GN=CYB5R3 PE=1 SV=3	1	8	8	8	8	8	8	46.5	46.5	46.5	34.234	301	301	0	133.57	46.5	28759000	28759000	28759000	14	14				24	98;203;205;567;982;1131;1489;1495	True;True;True;True;True;True;True;True	100;209;211;587;1015;1173;1551;1557	115;242;244;686;1167;1363;1780;1787	193;194;398;399;401;1105;1106;1858;1859;2194;2195;2196;2873;2886	194;399;401;1106;1859;2194;2873;2886
sp|P00505|AATM_HUMAN	sp|P00505|AATM_HUMAN	10	10	10	>sp|P00505|AATM_HUMAN Aspartate aminotransferase, mitochondrial OS=Homo sapiens OX=9606 GN=GOT2 PE=1 SV=3	1	10	10	10	10	10	10	32.8	32.8	32.8	47.517	430	430	0	129.75	32.8	23765000	23765000	23765000	19	19				25	117;172;310;460;673;706;1186;1187;1248;1518	True;True;True;True;True;True;True;True;True;True	119;176;320;476;696;729;1232;1233;1298;1583	138;207;374;566;808;847;1429;1430;1431;1508;1817	238;350;351;607;608;609;927;1279;1280;1358;2303;2304;2305;2306;2307;2308;2442;2443;2933	238;350;607;927;1279;1358;2303;2307;2442;2933
sp|P02786|TFR1_HUMAN	sp|P02786|TFR1_HUMAN	12	12	12	>sp|P02786|TFR1_HUMAN Transferrin receptor protein 1 OS=Homo sapiens OX=9606 GN=TFRC PE=1 SV=2	1	12	12	12	12	12	12	22.8	22.8	22.8	84.87	760	760	0	111.49	22.8	22532000	22532000	22532000	21	21				26	138;243;515;650;667;751;915;924;1216;1368;1769;1880	True;True;True;True;True;True;True;True;True;True;True;True	140;251;532;672;690;776;944;953;1265;1426;1843;1955	163;298;624;780;802;903;1088;1097;1475;1645;2190;2315	273;495;496;1013;1245;1272;1273;1442;1724;1725;1735;1736;2383;2384;2645;2646;2647;3521;3522;3523;3724	273;496;1013;1245;1272;1442;1724;1736;2383;2645;3522;3724
sp|P04040|CATA_HUMAN	sp|P04040|CATA_HUMAN	6	6	6	>sp|P04040|CATA_HUMAN Catalase OS=Homo sapiens OX=9606 GN=CAT PE=1 SV=3	1	6	6	6	6	6	6	13.7	13.7	13.7	59.755	527	527	0	40.191	13.7	7967700	7967700	7967700	9	9				27	436;562;1063;1089;1146;1332	True;True;True;True;True;True	450;582;1101;1127;1192;1388	516;681;1259;1310;1382;1607	828;1096;1097;2012;2013;2014;2106;2233;2591	828;1097;2013;2106;2233;2591
sp|P04075|ALDOA_HUMAN;sp|P09972|ALDOC_HUMAN	sp|P04075|ALDOA_HUMAN	7;1	7;1	7;1	>sp|P04075|ALDOA_HUMAN Fructose-bisphosphate aldolase A OS=Homo sapiens OX=9606 GN=ALDOA PE=1 SV=2	2	7	7	7	7	7	7	40.4	40.4	40.4	39.42	364	364;364	0	51.518	40.4	10469000	10469000	10469000	8	8				28	164;536;1254;1633;1677;1834;1896	True;True;True;True;True;True;True	168;555;1304;1700;1749;1909;1971	199;653;1516;1951;2084;2265;2332	339;1057;2452;3160;3161;3356;3357;3647;3751	339;1057;2452;3161;3357;3647;3751
sp|P04181|OAT_HUMAN	sp|P04181|OAT_HUMAN	11	11	11	>sp|P04181|OAT_HUMAN Ornithine aminotransferase, mitochondrial OS=Homo sapiens OX=9606 GN=OAT PE=1 SV=1	1	11	11	11	11	11	11	34.4	34.4	34.4	48.534	439	439	0	125.33	34.4	25490000	25490000	25490000	16	16				29	44;227;544;656;820;900;1042;1052;1657;1745;1846	True;True;True;True;True;True;True;True;True;True;True	45;235;563;679;849;929;1079;1090;1728;1819;1921	50;277;661;789;987;1072;1236;1247;1981;2162;2279	82;452;1067;1255;1574;1575;1697;1972;1973;1974;1990;3206;3207;3478;3479;3480;3674	82;452;1067;1255;1575;1697;1972;1990;3207;3480;3674
sp|P04264|K2C1_HUMAN	sp|P04264|K2C1_HUMAN	50	50	2	>sp|P04264|K2C1_HUMAN Keratin, type II cytoskeletal 1 OS=Homo sapiens OX=9606 GN=KRT1 PE=1 SV=6	1	50	50	2	50	50	2	63.4	63.4	3.3	66.038	644	644	0	323.31	63.4	3941800000	3941800000	3913500000	211	211				30	23;24;115;259;269;424;425;450;492;519;583;698;839;878;910;931;934;1016;1031;1032;1055;1128;1178;1179;1180;1181;1201;1222;1288;1360;1361;1362;1380;1387;1402;1426;1427;1432;1433;1445;1446;1452;1557;1558;1580;1594;1595;1817;1839;1841	True;True;True;True;True;True;True;True;True;True;True;True;True;True;True;True;True;True;True;True;True;True;True;True;True;True;True;True;True;True;True;True;True;True;True;True;True;True;True;True;True;True;True;True;True;True;True;True;True;True	23;24;117;268;278;279;438;439;466;508;536;603;721;868;907;939;960;961;964;965;966;1050;1051;1068;1069;1093;1169;1170;1224;1225;1226;1227;1248;1249;1250;1272;1342;1343;1417;1418;1419;1438;1445;1461;1486;1487;1492;1493;1505;1506;1512;1622;1623;1645;1659;1660;1891;1914;1916	26;27;136;317;328;329;330;500;501;502;503;504;532;533;534;535;536;537;538;539;540;541;542;543;544;545;546;547;548;549;550;551;552;553;554;555;599;628;629;703;838;1006;1048;1049;1082;1083;1105;1106;1109;1110;1111;1112;1113;1114;1204;1205;1206;1224;1225;1226;1250;1251;1357;1358;1359;1360;1416;1417;1418;1419;1420;1421;1422;1423;1424;1449;1450;1451;1452;1453;1454;1455;1456;1457;1458;1482;1559;1560;15…	41;42;43;44;45;46;234;235;236;526;527;545;546;547;548;549;550;793;794;795;796;797;798;799;800;801;802;803;804;805;806;807;808;851;852;853;854;855;856;857;858;859;860;861;862;863;864;865;866;867;868;869;870;871;872;873;874;875;876;877;878;879;880;881;882;883;884;885;886;887;888;889;890;891;892;893;894;895;896;897;898;899;900;901;902;903;904;905;906;907;908;909;910;911;912;913;914;974;1018;1019;102…	44;46;235;526;548;795;808;852;974;1019;1129;1342;1604;1667;1712;1746;1757;1916;1949;1954;1996;2185;2280;2285;2289;2294;2363;2401;2516;2635;2636;2637;2664;2677;2709;2749;2758;2768;2771;2793;2795;2806;3013;3017;3059;3087;3095;3612;3658;3662	7;8;9;10;11;12;13	259;262;296;326;339;469;493
sp|P04406|G3P_HUMAN	sp|P04406|G3P_HUMAN	10	10	10	>sp|P04406|G3P_HUMAN Glyceraldehyde-3-phosphate dehydrogenase OS=Homo sapiens OX=9606 GN=GAPDH PE=1 SV=3	1	10	10	10	10	10	10	51.6	51.6	51.6	36.053	335	335	0	173.04	51.6	70963000	70963000	70963000	17	17				31	473;537;733;988;1083;1676;1764;1796;1797;1819	True;True;True;True;True;True;True;True;True;True	489;556;756;1021;1121;1747;1748;1838;1870;1871;1893	580;654;878;1174;1304;2081;2082;2083;2185;2220;2221;2247	947;1058;1059;1404;1405;1871;1872;2098;2099;2100;3350;3351;3352;3353;3354;3355;3512;3513;3576;3577;3578;3579;3619	947;1058;1405;1872;2099;3352;3512;3578;3579;3619	14	46
sp|P04843|RPN1_HUMAN	sp|P04843|RPN1_HUMAN	10	10	10	>sp|P04843|RPN1_HUMAN Dolichyl-diphosphooligosaccharide--protein glycosyltransferase subunit 1 OS=Homo sapiens OX=9606 GN=RPN1 PE=1 SV=1	1	10	10	10	10	10	10	26	26	26	68.569	607	607	0	77.987	26	19019000	19019000	19019000	19	19				32	97;439;489;807;1044;1272;1384;1561;1623;1711	True;True;True;True;True;True;True;True;True;True	99;453;505;836;1081;1325;1442;1626;1689;1785	113;114;519;596;971;1238;1541;1662;1868;1939;2126	190;191;192;832;971;1548;1549;1550;1976;1977;2493;2669;2670;3025;3026;3027;3028;3143;3429	191;832;971;1548;1976;2493;2670;3027;3143;3429
sp|P04844|RPN2_HUMAN	sp|P04844|RPN2_HUMAN	9	9	9	>sp|P04844|RPN2_HUMAN Dolichyl-diphosphooligosaccharide--protein glycosyltransferase subunit 2 OS=Homo sapiens OX=9606 GN=RPN2 PE=1 SV=3	1	9	9	9	9	9	9	27.9	27.9	27.9	69.283	631	631	0	72.537	27.9	11393000	11393000	11393000	11	11				33	121;870;929;1051;1209;1210;1551;1860;1861	True;True;True;True;True;True;True;True;True	123;899;958;1089;1258;1259;1616;1935;1936	142;1039;1103;1246;1468;1469;1855;2294;2295	246;1651;1744;1988;1989;2374;2375;3002;3697;3698;3699	246;1651;1744;1989;2374;2375;3002;3698;3699
sp|P05023|AT1A1_HUMAN;sp|P13637|AT1A3_HUMAN;sp|P50993|AT1A2_HUMAN;sp|Q13733|AT1A4_HUMAN;sp|P20648|ATP4A_HUMAN;sp|P54707|AT12A_HUMAN	sp|P05023|AT1A1_HUMAN;sp|P13637|AT1A3_HUMAN;sp|P50993|AT1A2_HUMAN	17;11;11;5;2;2	17;11;11;5;2;2	17;11;11;5;2;2	>sp|P05023|AT1A1_HUMAN Sodium/potassium-transporting ATPase subunit alpha-1 OS=Homo sapiens OX=9606 GN=ATP1A1 PE=1 SV=1;>sp|P13637|AT1A3_HUMAN Sodium/potassium-transporting ATPase subunit alpha-3 OS=Homo sapiens OX=9606 GN=ATP1A3 PE=1 SV=3;>sp|P50993|AT1A2	6	17	17	17	17	17	17	23.1	23.1	23.1	112.89	1023	1023;1013;1020;1029;1035;1039	0	177.78	23.1	31521000	31521000	31521000	27	27				34	16;131;353;598;985;1033;1130;1184;1185;1212;1227;1255;1273;1274;1461;1679;1717	True;True;True;True;True;True;True;True;True;True;True;True;True;True;True;True;True	16;133;365;619;1018;1070;1172;1230;1231;1261;1277;1305;1326;1327;1522;1751;1791	17;153;420;722;1170;1227;1362;1427;1428;1471;1487;1517;1518;1542;1543;1749;2086;2132	26;262;682;683;684;1167;1863;1864;1956;1957;2193;2299;2300;2301;2302;2377;2409;2453;2454;2494;2495;2496;2497;2823;2824;3359;3360;3361;3437	26;262;683;1167;1863;1957;2193;2299;2301;2377;2409;2453;2494;2496;2824;3361;3437
sp|P05090|APOD_HUMAN	sp|P05090|APOD_HUMAN	4	4	4	>sp|P05090|APOD_HUMAN Apolipoprotein D OS=Homo sapiens OX=9606 GN=APOD PE=1 SV=1	1	4	4	4	4	4	4	18.5	18.5	18.5	21.275	189	189	0	35.967	18.5	2615900	2615900	2615900	6	6				35	165;774;869;1137	True;True;True;True	169;803;898;1181;1182	200;931;1038;1371;1372	340;341;1485;1486;1649;1650;2214;2215;2216	341;1485;1650;2216	15	177
sp|P05091|ALDH2_HUMAN	sp|P05091|ALDH2_HUMAN	12	12	12	>sp|P05091|ALDH2_HUMAN Aldehyde dehydrogenase, mitochondrial OS=Homo sapiens OX=9606 GN=ALDH2 PE=1 SV=2	1	12	12	12	12	12	12	40.8	40.8	40.8	56.381	517	517	0	133.96	40.8	22549000	22549000	22549000	19	19				36	6;96;212;277;337;606;617;888;975;1538;1654;1720	True;True;True;True;True;True;True;True;True;True;True;True	6;98;218;287;348;628;639;917;1008;1603;1725;1794	6;112;251;338;403;732;745;1059;1160;1840;1841;1978;2135	9;189;410;559;560;650;651;652;1179;1198;1681;1845;1846;2976;2977;2978;3199;3200;3442	9;189;410;560;651;1179;1198;1681;1846;2978;3200;3442
sp|P05141|ADT2_HUMAN;sp|P12235|ADT1_HUMAN	sp|P05141|ADT2_HUMAN	4;1	4;1	2;0	>sp|P05141|ADT2_HUMAN ADP/ATP translocase 2 OS=Homo sapiens OX=9606 GN=SLC25A5 PE=1 SV=7	2	4	4	2	4	4	2	14.4	14.4	8.1	32.852	298	298;298	0	26.102	14.4	11061000	11061000	11061000	4	4				37	15;189;351;1010	True;True;True;True	15;194;363;1044	16;226;418;1198	25;376;679;1905;1906	25;376;679;1906
sp|P05387|RLA2_HUMAN	sp|P05387|RLA2_HUMAN	7	7	7	>sp|P05387|RLA2_HUMAN 60S acidic ribosomal protein P2 OS=Homo sapiens OX=9606 GN=RPLP2 PE=1 SV=1	1	7	7	7	7	7	7	73.9	73.9	73.9	11.665	115	115	0	52.581	73.9	32681000	32681000	32681000	8	8				38	744;852;919;920;921;1171;1897	True;True;True;True;True;True;True	769;881;948;949;950;1217;1972	895;896;1020;1092;1093;1094;1408;2333	1434;1435;1621;1730;1731;1732;2269;3752	1434;1621;1730;1731;1732;2269;3752
sp|P05388|RLA0_HUMAN;sp|Q8NHW5|RLA0L_HUMAN	sp|P05388|RLA0_HUMAN;sp|Q8NHW5|RLA0L_HUMAN	5;3	5;3	5;3	>sp|P05388|RLA0_HUMAN 60S acidic ribosomal protein P0 OS=Homo sapiens OX=9606 GN=RPLP0 PE=1 SV=1;>sp|Q8NHW5|RLA0L_HUMAN 60S acidic ribosomal protein P0-like OS=Homo sapiens OX=9606 GN=RPLP0P6 PE=5 SV=1	2	5	5	5	5	5	5	29.3	29.3	29.3	34.273	317	317;317	0	30.831	29.3	13680000	13680000	13680000	6	6				39	40;46;155;531;1727	True;True;True;True;True	40;47;157;550;1801	44;52;182;648;2143	71;85;86;303;1051;3454;3455	71;85;303;1051;3455
sp|P05556|ITB1_HUMAN	sp|P05556|ITB1_HUMAN	4	4	4	>sp|P05556|ITB1_HUMAN Integrin beta-1 OS=Homo sapiens OX=9606 GN=ITGB1 PE=1 SV=2	1	4	4	4	4	4	4	11	11	11	88.414	798	798	0	24.843	11	3023500	3023500	3023500	7	7				40	27;801;993;1019	True;True;True;True	27;830;1026;1054	30;964;1179;1209	50;51;52;1534;1535;1877;1922	52;1535;1877;1922
sp|P05783|K1C18_HUMAN;sp|Q92764|KRT35_HUMAN	sp|P05783|K1C18_HUMAN	29;1	29;1	19;0	>sp|P05783|K1C18_HUMAN Keratin, type I cytoskeletal 18 OS=Homo sapiens OX=9606 GN=KRT18 PE=1 SV=2	2	29	29	19	29	29	19	73.7	73.7	53	48.057	430	430;455	0	323.31	73.7	448530000	448530000	447500000	47	47				41	111;114;122;365;525;526;551;817;824;935;999;1048;1169;1252;1258;1310;1311;1340;1344;1435;1438;1439;1483;1636;1724;1725;1806;1830;1901	True;True;True;True;True;True;True;True;True;True;True;True;True;True;True;True;True;True;True;True;True;True;True;True;True;True;True;True;True	113;116;124;377;378;542;543;544;545;570;846;853;967;1032;1033;1085;1086;1215;1302;1309;1310;1365;1366;1367;1397;1401;1495;1498;1499;1545;1703;1704;1798;1799;1880;1904;1905;1976	131;132;135;143;433;434;635;636;637;638;639;640;641;642;643;669;983;984;991;1115;1185;1186;1242;1243;1406;1512;1513;1514;1524;1525;1583;1584;1585;1586;1616;1620;1721;1724;1725;1774;1954;1955;2139;2140;2141;2232;2258;2259;2260;2261;2337	225;226;227;228;229;232;233;247;699;700;701;1030;1031;1032;1033;1034;1035;1036;1037;1038;1039;1040;1041;1042;1043;1044;1079;1569;1570;1571;1579;1580;1581;1759;1760;1884;1885;1886;1982;1983;1984;1985;2267;2448;2449;2450;2462;2463;2552;2553;2554;2555;2556;2557;2558;2604;2605;2609;2610;2611;2773;2776;2777;2778;2779;2780;2781;2782;2863;2864;3166;3167;3168;3169;3446;3447;3448;3449;3450;3451;3591;3637;…	225;233;247;701;1034;1042;1079;1569;1580;1760;1886;1984;2267;2449;2462;2553;2558;2605;2609;2773;2777;2782;2864;3168;3447;3450;3591;3641;3756	16;17;18;19;20;21;22	58;74;84;213;313;335;402
sp|P06576|ATPB_HUMAN	sp|P06576|ATPB_HUMAN	18	18	18	>sp|P06576|ATPB_HUMAN ATP synthase subunit beta, mitochondrial OS=Homo sapiens OX=9606 GN=ATP5F1B PE=1 SV=3	1	18	18	18	18	18	18	55.2	55.2	55.2	56.559	529	529	0	236.36	55.2	82729000	82729000	82729000	21	21				42	59;62;237;307;432;513;756;761;773;848;1086;1449;1450;1564;1611;1630;1658;1795	True;True;True;True;True;True;True;True;True;True;True;True;True;True;True;True;True;True	60;63;245;317;446;530;781;782;788;801;802;877;1124;1509;1510;1629;1676;1696;1697;1729;1869	65;68;290;291;370;512;622;908;909;915;929;930;1015;1307;1736;1737;1871;1923;1947;1948;1982;2219	106;109;478;479;480;481;482;602;821;822;1009;1010;1449;1450;1451;1458;1459;1483;1484;1614;2103;2802;2803;2804;3032;3033;3120;3153;3154;3155;3208;3575	106;109;479;602;821;1009;1449;1459;1484;1614;2103;2802;2804;3032;3120;3155;3208;3575	23;24;25;26	145;217;342;408
sp|P06733|ENOA_HUMAN;sp|P13929|ENOB_HUMAN;sp|P09104|ENOG_HUMAN	sp|P06733|ENOA_HUMAN	11;2;2	11;2;2	11;2;2	>sp|P06733|ENOA_HUMAN Alpha-enolase OS=Homo sapiens OX=9606 GN=ENO1 PE=1 SV=2	3	11	11	11	11	11	11	39.9	39.9	39.9	47.168	434	434;434;434	0	99.63	39.9	21498000	21498000	21498000	16	16				43	14;180;181;452;626;705;866;1373;1400;1760;1869	True;True;True;True;True;True;True;True;True;True;True	14;185;186;468;648;728;895;1431;1459;1834;1944	15;216;217;558;755;846;1035;1650;1679;1680;2178;2303	23;24;364;365;918;1213;1357;1646;2653;2703;2704;2705;2706;3503;3504;3708	23;364;365;918;1213;1357;1646;2653;2703;3503;3708
sp|P06748|NPM_HUMAN	sp|P06748|NPM_HUMAN	10	10	10	>sp|P06748|NPM_HUMAN Nucleophosmin OS=Homo sapiens OX=9606 GN=NPM1 PE=1 SV=2	1	10	10	10	10	10	10	37.1	37.1	37.1	32.575	294	294	0	98.896	37.1	76513000	76513000	76513000	15	15				44	21;185;568;1132;1133;1134;1423;1637;1638;1678	True;True;True;True;True;True;True;True;True;True	21;190;588;1174;1175;1176;1177;1483;1705;1706;1750	22;23;221;687;1364;1365;1366;1367;1706;1956;1957;1958;2085	33;34;35;36;371;1107;1108;2197;2198;2199;2200;2201;2202;2203;2204;2205;2743;3170;3171;3172;3173;3358	36;371;1108;2199;2201;2205;2743;3170;3173;3358	27;28	81;278
sp|P07237|PDIA1_HUMAN	sp|P07237|PDIA1_HUMAN	20	20	20	>sp|P07237|PDIA1_HUMAN Protein disulfide-isomerase OS=Homo sapiens OX=9606 GN=P4HB PE=1 SV=3	1	20	20	20	20	20	20	49.8	49.8	49.8	57.116	508	508	0	222.42	49.8	63761000	63761000	63761000	31	31				45	271;646;741;746;748;963;989;1111;1159;1202;1203;1271;1359;1549;1550;1554;1625;1669;1710;1870	True;True;True;True;True;True;True;True;True;True;True;True;True;True;True;True;True;True;True;True	281;668;765;766;771;773;996;1022;1150;1205;1251;1252;1324;1416;1614;1615;1619;1691;1740;1784;1945	332;776;891;892;898;900;1148;1175;1338;1396;1459;1460;1540;1635;1853;1854;1858;1941;2070;2125;2304	552;1241;1428;1429;1437;1439;1820;1821;1822;1873;2158;2159;2249;2250;2251;2365;2366;2492;2633;2634;2996;2997;2998;2999;3000;3001;3005;3006;3145;3331;3332;3333;3334;3428;3709;3710	552;1241;1428;1437;1439;1820;1873;2158;2251;2365;2366;2492;2634;2998;3000;3006;3145;3332;3428;3710	29;30	356;425
sp|P07339|CATD_HUMAN	sp|P07339|CATD_HUMAN	4	4	4	>sp|P07339|CATD_HUMAN Cathepsin D OS=Homo sapiens OX=9606 GN=CTSD PE=1 SV=1	1	4	4	4	4	4	4	14.1	14.1	14.1	44.552	412	412	0	28.685	14.1	6733900	6733900	6733900	5	5				46	63;233;397;997	True;True;True;True	64;241;410;1030	69;284;470;1183	110;111;465;754;1882	110;465;754;1882
sp|P07355|ANXA2_HUMAN;sp|A6NMY6|AXA2L_HUMAN	sp|P07355|ANXA2_HUMAN;sp|A6NMY6|AXA2L_HUMAN	7;4	7;4	7;4	>sp|P07355|ANXA2_HUMAN Annexin A2 OS=Homo sapiens OX=9606 GN=ANXA2 PE=1 SV=2;>sp|A6NMY6|AXA2L_HUMAN Putative annexin A2-like protein OS=Homo sapiens OX=9606 GN=ANXA2P2 PE=5 SV=2	2	7	7	7	7	7	7	28.3	28.3	28.3	38.604	339	339;339	0	91.881	28.3	30730000	30730000	30730000	11	11				47	26;595;1059;1264;1525;1596;1598	True;True;True;True;True;True;True	26;616;1097;1316;1590;1661;1663	29;718;719;1255;1531;1824;1906;1909	48;49;1160;1161;2006;2007;2469;2470;2944;3097;3101	49;1160;2006;2470;2944;3097;3101
sp|P07900|HS90A_HUMAN;sp|Q14568|HS902_HUMAN;sp|Q58FF6|H90B4_HUMAN;sp|Q58FF7|H90B3_HUMAN	sp|P07900|HS90A_HUMAN	8;2;1;1	4;0;0;0	4;0;0;0	>sp|P07900|HS90A_HUMAN Heat shock protein HSP 90-alpha OS=Homo sapiens OX=9606 GN=HSP90AA1 PE=1 SV=5	4	8	4	4	8	4	4	16.7	8.6	8.6	84.659	732	732;343;505;597	0	38.6	16.7	3121600	3121600	3121600	10	10				48	221;241;603;635;645;969;1716;1863	True;True;False;True;False;True;False;False	227;249;625;657;667;1002;1790;1938	261;296;729;765;775;1154;2131;2297	425;426;427;428;429;492;493;1175;1176;1225;1240;1832;1833;3436;3702	425;493;1176;1225;1240;1832;3436;3702
sp|P07910|HNRPC_HUMAN;sp|P0DMR1|HNRC4_HUMAN;sp|O60812|HNRC1_HUMAN;sp|B7ZW38|HNRC3_HUMAN;sp|B2RXH8|HNRC2_HUMAN;sp|Q86SE5|RALYL_HUMAN	sp|P07910|HNRPC_HUMAN	8;3;3;3;3;1	8;3;3;3;3;1	8;3;3;3;3;1	>sp|P07910|HNRPC_HUMAN Heterogeneous nuclear ribonucleoproteins C1/C2 OS=Homo sapiens OX=9606 GN=HNRNPC PE=1 SV=4	6	8	8	8	8	8	8	26.8	26.8	26.8	33.67	306	306;293;293;293;293;291	0	92.001	26.8	32631000	32631000	32631000	9	9				49	497;821;881;992;1116;1152;1381;1686	True;True;True;True;True;True;True;True	513;850;910;1025;1155;1156;1198;1439;1759	604;988;1052;1178;1343;1344;1389;1659;2095	982;1576;1672;1673;1876;2166;2167;2241;2666;3376;3377	982;1576;1672;1876;2166;2241;2666;3377	31	74
sp|P07954|FUMH_HUMAN	sp|P07954|FUMH_HUMAN	8	8	8	>sp|P07954|FUMH_HUMAN Fumarate hydratase, mitochondrial OS=Homo sapiens OX=9606 GN=FH PE=1 SV=3	1	8	8	8	8	8	8	35.9	35.9	35.9	54.636	510	510	0	64.305	35.9	17694000	17694000	17694000	12	12				50	0;775;831;1028;1030;1167;1560;1650	True;True;True;True;True;True;True;True	0;804;860;1064;1066;1067;1213;1625;1721	0;932;998;1220;1222;1223;1404;1867;1974	0;1;1487;1488;1592;1940;1941;1943;1944;1945;1946;2265;3022;3023;3024;3195	0;1488;1592;1940;1944;2265;3022;3195	32	151
sp|P08195|4F2_HUMAN	sp|P08195|4F2_HUMAN	6	6	6	>sp|P08195|4F2_HUMAN 4F2 cell-surface antigen heavy chain OS=Homo sapiens OX=9606 GN=SLC3A2 PE=1 SV=3	1	6	6	6	6	6	6	11.6	11.6	11.6	67.993	630	630	0	80.415	11.6	12616000	12616000	12616000	6	6				51	454;494;554;576;578;1652	True;True;True;True;True;True	470;510;573;596;598;1723	560;601;672;696;698;1976	920;978;1083;1118;1119;1121;3197	920;978;1083;1118;1121;3197
sp|P08238|HS90B_HUMAN	sp|P08238|HS90B_HUMAN	10	9	5	>sp|P08238|HS90B_HUMAN Heat shock protein HSP 90-beta OS=Homo sapiens OX=9606 GN=HSP90AB1 PE=1 SV=4	1	10	9	5	10	9	5	20.9	19.2	11	83.263	724	724	0	65.496	20.9	17759000	17759000	17759000	10	10				52	338;603;634;645;970;1096;1207;1716;1858;1863	False;True;True;True;True;True;True;True;True;True	349;625;656;667;1003;1134;1256;1790;1933;1938	404;729;764;775;1155;1321;1465;2131;2291;2297	653;654;1175;1176;1224;1240;1834;2124;2371;3436;3691;3702	654;1176;1224;1240;1834;2124;2371;3436;3691;3702
sp|P08559|ODPA_HUMAN;sp|P29803|ODPAT_HUMAN	sp|P08559|ODPA_HUMAN	4;1	4;1	4;1	>sp|P08559|ODPA_HUMAN Pyruvate dehydrogenase E1 component subunit alpha, somatic form, mitochondrial OS=Homo sapiens OX=9606 GN=PDHA1 PE=1 SV=3	2	4	4	4	4	4	4	16.7	16.7	16.7	43.295	390	390;388	0	25.339	16.7	3936100	3936100	3936100	4	4				53	2;499;561;936	True;True;True;True	2;515;581;968	2;606;680;1116	3;985;1095;1761	3;985;1095;1761
sp|P08865|RSSA_HUMAN	sp|P08865|RSSA_HUMAN	7	7	7	>sp|P08865|RSSA_HUMAN 40S ribosomal protein SA OS=Homo sapiens OX=9606 GN=RPSA PE=1 SV=4	1	7	7	7	7	7	7	45.8	45.8	45.8	32.854	295	295	0	79.137	45.8	20006000	20006000	20006000	13	13				54	19;66;317;387;422;456;1898	True;True;True;True;True;True;True	19;67;327;400;436;472;1973	20;72;381;458;459;460;498;562;2334	29;30;114;115;116;619;620;734;735;736;790;922;3753	29;114;620;735;790;922;3753
sp|P09211|GSTP1_HUMAN	sp|P09211|GSTP1_HUMAN	4	4	4	>sp|P09211|GSTP1_HUMAN Glutathione S-transferase P OS=Homo sapiens OX=9606 GN=GSTP1 PE=1 SV=2	1	4	4	4	4	4	4	30	30	30	23.356	210	210	0	40.705	30	9364700	9364700	9364700	7	7				55	118;441;1249;1579	True;True;True;True	120;455;1299;1644	139;521;1509;1886	239;240;241;836;2444;2445;3056	240;836;2445;3056
sp|P09327|VILI_HUMAN	sp|P09327|VILI_HUMAN	7	7	7	>sp|P09327|VILI_HUMAN Villin-1 OS=Homo sapiens OX=9606 GN=VIL1 PE=1 SV=4	1	7	7	7	7	7	7	11.2	11.2	11.2	92.694	827	827	0	54.761	11.2	9394300	9394300	9394300	8	8				56	13;381;666;952;1141;1278;1647	True;True;True;True;True;True;True	13;394;689;985;1187;1331;1718	14;452;801;1134;1377;1547;1971	21;22;726;1271;1792;2224;2501;3192	21;726;1271;1792;2224;2501;3192
sp|P09429|HMGB1_HUMAN;sp|B2RPK0|HGB1A_HUMAN	sp|P09429|HMGB1_HUMAN;sp|B2RPK0|HGB1A_HUMAN	4;2	4;2	4;2	>sp|P09429|HMGB1_HUMAN High mobility group protein B1 OS=Homo sapiens OX=9606 GN=HMGB1 PE=1 SV=3;>sp|B2RPK0|HGB1A_HUMAN Putative high mobility group protein B1-like 1 OS=Homo sapiens OX=9606 GN=HMGB1P1 PE=5 SV=1	2	4	4	4	4	4	4	26.5	26.5	26.5	24.893	215	215;211	0	24.985	26.5	5263800	5263800	5263800	4	4				57	740;850;962;1646	True;True;True;True	764;879;995;1717	890;1017;1147;1970	1426;1427;1616;1819;3191	1427;1616;1819;3191
sp|P09525|ANXA4_HUMAN	sp|P09525|ANXA4_HUMAN	6	6	6	>sp|P09525|ANXA4_HUMAN Annexin A4 OS=Homo sapiens OX=9606 GN=ANXA4 PE=1 SV=4	1	6	6	6	6	6	6	27.6	27.6	27.6	35.882	319	319	0	42.286	27.6	6791000	6791000	6791000	7	7				58	30;470;549;1170;1263;1389	True;True;True;True;True;True	30;486;568;1216;1315;1447	33;577;667;1407;1530;1667	56;943;944;1076;2268;2468;2680	56;944;1076;2268;2468;2680
sp|P09622|DLDH_HUMAN	sp|P09622|DLDH_HUMAN	4	4	4	>sp|P09622|DLDH_HUMAN Dihydrolipoyl dehydrogenase, mitochondrial OS=Homo sapiens OX=9606 GN=DLD PE=1 SV=2	1	4	4	4	4	4	4	10.4	10.4	10.4	54.177	509	509	0	43.871	10.4	5190300	5190300	5190300	7	7				59	17;771;1385;1593	True;True;True;True	17;799;1443;1658	18;927;1663;1902	27;1476;1477;1478;2671;3084;3085	27;1476;2671;3085
sp|P09651|ROA1_HUMAN;sp|Q32P51|RA1L2_HUMAN	sp|P09651|ROA1_HUMAN;sp|Q32P51|RA1L2_HUMAN	13;8	12;7	12;7	>sp|P09651|ROA1_HUMAN Heterogeneous nuclear ribonucleoprotein A1 OS=Homo sapiens OX=9606 GN=HNRNPA1 PE=1 SV=5;>sp|Q32P51|RA1L2_HUMAN Heterogeneous nuclear ribonucleoprotein A1-like 2 OS=Homo sapiens OX=9606 GN=HNRNPA1L2 PE=2 SV=2	2	13	12	12	13	12	12	41.1	38.7	38.7	38.746	372	372;320	0	133.25	41.1	76199000	76199000	76199000	27	27				60	267;289;290;291;498;508;700;862;947;1215;1392;1475;1859	True;True;True;False;True;True;True;True;True;True;True;True;True	276;299;300;301;514;524;723;891;979;1264;1450;1536;1934	326;352;353;354;605;615;616;840;1030;1031;1127;1474;1670;1763;1764;2292;2293	541;542;577;578;579;580;983;984;997;998;999;1345;1638;1639;1779;2380;2381;2382;2684;2685;2843;2844;2845;2846;3692;3693;3694;3695;3696	542;578;579;580;984;998;1345;1639;1779;2380;2685;2845;3694
sp|Q99878|H2A1J_HUMAN;sp|Q96KK5|H2A1H_HUMAN;sp|Q9BTM1|H2AJ_HUMAN;sp|Q16777|H2A2C_HUMAN;sp|Q6FI13|H2A2A_HUMAN;sp|P20671|H2A1D_HUMAN;sp|P0C0S8|H2A1_HUMAN;sp|Q93077|H2A1C_HUMAN;sp|Q7L7L0|H2A3_HUMAN;sp|P04908|H2A1B_HUMAN;sp|Q96QV6|H2A1A_HUMAN;sp|P16104|H2AX_HUMAN;sp|Q71UI9|H2AV_HUMAN;sp|P0C0S5|H2AZ_HUMAN;sp|Q8IUE6|H2A2B_HUMAN	sp|Q99878|H2A1J_HUMAN;sp|Q96KK5|H2A1H_HUMAN;sp|Q9BTM1|H2AJ_HUMAN;sp|Q16777|H2A2C_HUMAN;sp|Q6FI13|H2A2A_HUMAN;sp|P20671|H2A1D_HUMAN;sp|P0C0S8|H2A1_HUMAN;sp|Q93077|H2A1C_HUMAN;sp|Q7L7L0|H2A3_HUMAN;sp|P04908|H2A1B_HUMAN;sp|Q96QV6|H2A1A_HUMAN;sp|P16104|H2AX_HUMAN	5;5;5;5;5;5;5;4;4;4;3;3;2;2;1	5;5;5;5;5;5;5;4;4;4;3;3;2;2;1	5;5;5;5;5;5;5;4;4;4;3;3;2;2;1	>sp|Q99878|H2A1J_HUMAN Histone H2A type 1-J OS=Homo sapiens OX=9606 GN=HIST1H2AJ PE=1 SV=3;>sp|Q96KK5|H2A1H_HUMAN Histone H2A type 1-H OS=Homo sapiens OX=9606 GN=HIST1H2AH PE=1 SV=3;>sp|Q9BTM1|H2AJ_HUMAN Histone H2A.J OS=Homo sapiens OX=9606 GN=H2AFJ PE=1	15	5	5	5	5	5	5	35.9	35.9	35.9	13.936	128	128;128;129;129;130;130;130;130;130;130;131;143;128;128;130	0	61.554	35.9	211310000	211310000	211310000	11	11				61	53;637;638;1151;1787	True;True;True;True;True	54;659;660;1197;1861	59;767;768;1388;2209;2210	97;98;1227;1228;1229;2240;3556;3557;3558;3559;3560	97;1227;1229;2240;3556
sp|P0CG12|DERPC_HUMAN	sp|P0CG12|DERPC_HUMAN	9	9	9	>sp|P0CG12|DERPC_HUMAN Decreased expression in renal and prostate cancer protein OS=Homo sapiens OX=9606 GN=DERPC PE=1 SV=1	1	9	9	9	9	9	9	25.6	25.6	25.6	51.391	524	524	0	74.614	25.6	25514000	25514000	25514000	17	17				62	50;56;469;522;1246;1250;1401;1543;1763	True;True;True;True;True;True;True;True;True	51;57;485;539;1296;1300;1460;1608;1837	56;62;575;576;632;1506;1510;1681;1847;2181;2182;2183;2184	93;94;103;941;942;1025;1026;2438;2439;2440;2446;2707;2988;3508;3509;3510;3511	94;103;941;1026;2439;2446;2707;2988;3508
sp|P62987|RL40_HUMAN;sp|P62979|RS27A_HUMAN;sp|P0CG47|UBB_HUMAN;sp|P0CG48|UBC_HUMAN	sp|P62987|RL40_HUMAN;sp|P62979|RS27A_HUMAN;sp|P0CG47|UBB_HUMAN;sp|P0CG48|UBC_HUMAN	5;5;5;5	5;5;5;5	5;5;5;5	>sp|P62987|RL40_HUMAN Ubiquitin-60S ribosomal protein L40 OS=Homo sapiens OX=9606 GN=UBA52 PE=1 SV=2;>sp|P62979|RS27A_HUMAN Ubiquitin-40S ribosomal protein S27a OS=Homo sapiens OX=9606 GN=RPS27A PE=1 SV=2;>sp|P0CG47|UBB_HUMAN Polyubiquitin-B OS=Homo sapien	4	5	5	5	5	5	5	36.7	36.7	36.7	14.728	128	128;156;229;685	0	89.646	36.7	52870000	52870000	52443000	10	10				63	306;359;777;1568;1587	True;True;True;True;True	316;371;806;1633;1652	369;426;934;935;936;1875;1895	601;690;691;1490;1491;1492;1493;3038;3039;3040;3076	601;691;1490;3039;3076
sp|P0DMV9|HS71B_HUMAN;sp|P0DMV8|HS71A_HUMAN	sp|P0DMV9|HS71B_HUMAN;sp|P0DMV8|HS71A_HUMAN	6;6	4;4	2;2	>sp|P0DMV9|HS71B_HUMAN Heat shock 70 kDa protein 1B OS=Homo sapiens OX=9606 GN=HSPA1B PE=1 SV=1;>sp|P0DMV8|HS71A_HUMAN Heat shock 70 kDa protein 1A OS=Homo sapiens OX=9606 GN=HSPA1A PE=1 SV=1	2	6	4	2	6	4	2	14.4	10.9	6.6	70.051	641	641;641	0	34.295	14.4	3892200	3892200	3892200	4	4				64	176;335;731;812;1090;1622	True;True;True;False;True;False	181;346;754;841;1128;1688	212;401;876;976;1311;1938	358;648;1402;1556;2107;2108;3142	358;648;1402;1556;2108;3142
sp|P16403|H12_HUMAN;sp|P10412|H14_HUMAN;sp|P16402|H13_HUMAN;sp|P22492|H1T_HUMAN;sp|Q02539|H11_HUMAN	sp|P16403|H12_HUMAN;sp|P10412|H14_HUMAN;sp|P16402|H13_HUMAN;sp|P22492|H1T_HUMAN;sp|Q02539|H11_HUMAN	4;4;4;3;3	4;4;4;3;3	4;4;4;3;3	>sp|P16403|H12_HUMAN Histone H1.2 OS=Homo sapiens OX=9606 GN=HIST1H1C PE=1 SV=2;>sp|P10412|H14_HUMAN Histone H1.4 OS=Homo sapiens OX=9606 GN=HIST1H1E PE=1 SV=2;>sp|P16402|H13_HUMAN Histone H1.3 OS=Homo sapiens OX=9606 GN=HIST1H1D PE=1 SV=2;>sp|P22492|H1T_H	5	4	4	4	4	4	4	13.6	13.6	13.6	21.364	213	213;219;221;207;215	0	34.541	13.6	7273800	7273800	6021700	6	6				65	72;73;835;836	True;True;True;True	73;74;864;865	79;80;81;1002;1003	126;127;128;129;1598;1599;1600	126;129;1598;1600
sp|P10515|ODP2_HUMAN	sp|P10515|ODP2_HUMAN	4	4	4	>sp|P10515|ODP2_HUMAN Dihydrolipoyllysine-residue acetyltransferase component of pyruvate dehydrogenase complex, mitochondrial OS=Homo sapiens OX=9606 GN=DLAT PE=1 SV=3	1	4	4	4	4	4	4	8.7	8.7	8.7	68.996	647	647	0	25.327	8.7	3852300	3852300	3852300	5	5				66	204;501;1762;1794	True;True;True;True	210;517;1836;1868	243;608;2180;2218	400;987;3506;3507;3574	400;987;3506;3574
sp|P10809|CH60_HUMAN	sp|P10809|CH60_HUMAN	44	44	44	>sp|P10809|CH60_HUMAN 60 kDa heat shock protein, mitochondrial OS=Homo sapiens OX=9606 GN=HSPD1 PE=1 SV=2	1	44	44	44	44	44	44	77.8	77.8	77.8	61.054	573	573	0	323.31	77.8	942260000	942260000	939310000	109	109				67	12;81;99;100;151;152;159;225;242;321;475;600;601;608;711;762;780;781;782;805;854;875;1057;1093;1145;1334;1338;1416;1417;1418;1510;1511;1512;1581;1582;1626;1695;1696;1697;1698;1699;1701;1782;1788	True;True;True;True;True;True;True;True;True;True;True;True;True;True;True;True;True;True;True;True;True;True;True;True;True;True;True;True;True;True;True;True;True;True;True;True;True;True;True;True;True;True;True;True	12;82;83;101;102;153;154;161;232;233;250;331;491;621;622;623;630;734;789;790;809;810;811;834;883;904;1095;1131;1191;1390;1391;1395;1476;1477;1478;1573;1574;1575;1576;1577;1646;1647;1692;1768;1769;1770;1771;1772;1773;1775;1856;1862	12;13;89;90;91;92;93;94;95;116;117;176;177;178;179;187;268;269;270;271;272;273;274;275;297;385;582;724;725;726;734;852;916;917;918;939;940;941;942;943;944;968;969;1022;1044;1045;1253;1314;1315;1316;1317;1318;1381;1609;1610;1614;1699;1700;1701;1803;1804;1805;1806;1807;1808;1809;1810;1811;1888;1889;1890;1942;2105;2106;2107;2108;2109;2110;2111;2112;2113;2114;2116;2203;2204;2211	18;19;20;145;146;147;148;149;150;151;152;153;154;155;156;157;158;159;160;195;196;197;198;293;294;295;296;297;298;299;313;314;315;316;317;441;442;443;444;445;446;447;448;449;450;494;624;949;1169;1170;1171;1172;1182;1183;1363;1364;1460;1461;1462;1463;1464;1465;1497;1498;1499;1500;1501;1502;1503;1504;1505;1506;1540;1541;1542;1543;1544;1625;1626;1659;1660;1661;1662;2001;2002;2003;2112;2113;2114;2115;…	20;158;195;198;294;298;315;442;494;624;949;1170;1171;1183;1363;1464;1498;1500;1506;1542;1625;1660;2002;2120;2230;2596;2601;2734;2735;2738;2912;2915;2923;3066;3070;3146;3390;3400;3402;3405;3409;3416;3546;3561	33;34;35;36;37;38;39;40;41	40;55;145;316;356;495;561;564;572
sp|P11021|BIP_HUMAN	sp|P11021|BIP_HUMAN	31	31	30	>sp|P11021|BIP_HUMAN Endoplasmic reticulum chaperone BiP OS=Homo sapiens OX=9606 GN=HSPA5 PE=1 SV=2	1	31	31	30	31	31	30	49.1	49.1	49.1	72.332	654	654	0	323.31	49.1	134760000	134760000	134760000	50	50				68	83;134;175;228;301;360;389;694;697;701;728;730;813;859;880;884;890;1103;1120;1155;1166;1217;1218;1468;1487;1534;1576;1643;1734;1735;1811	True;True;True;True;True;True;True;True;True;True;True;True;True;True;True;True;True;True;True;True;True;True;True;True;True;True;True;True;True;True;True	85;136;179;180;236;311;372;402;717;720;724;751;753;842;888;909;913;919;1141;1160;1201;1212;1266;1267;1529;1549;1599;1641;1713;1808;1809;1885	97;157;210;211;278;364;427;462;833;837;841;872;874;875;977;1027;1051;1055;1062;1329;1348;1392;1403;1476;1477;1756;1778;1835;1836;1883;1966;2150;2151;2237	162;267;356;357;453;454;594;692;739;1332;1339;1340;1346;1347;1396;1397;1400;1401;1557;1558;1634;1670;1671;1677;1686;2139;2140;2141;2142;2173;2245;2264;2385;2386;2387;2388;2389;2390;2834;2835;2836;2869;2968;2969;2970;2971;3053;3183;3184;3464;3465;3597;3598	162;267;356;453;594;692;739;1332;1340;1346;1397;1401;1558;1634;1671;1677;1686;2140;2173;2245;2264;2385;2389;2835;2869;2969;3053;3184;3464;3465;3597	42	196
sp|P11142|HSP7C_HUMAN;sp|P54652|HSP72_HUMAN	sp|P11142|HSP7C_HUMAN	20;7	19;6	17;4	>sp|P11142|HSP7C_HUMAN Heat shock cognate 71 kDa protein OS=Homo sapiens OX=9606 GN=HSPA8 PE=1 SV=1	2	20	19	17	20	19	17	33.7	33.7	30.3	70.897	646	646;639	0	211.57	33.7	65075000	65075000	65075000	31	31				69	174;396;400;728;729;812;930;1119;1219;1220;1223;1313;1330;1396;1469;1481;1622;1641;1667;1768	True;True;True;False;True;True;True;True;True;True;True;True;True;True;True;True;True;True;True;True	178;409;413;751;752;841;959;1159;1268;1269;1270;1273;1369;1386;1454;1530;1543;1688;1711;1738;1842	209;469;473;872;873;976;1104;1347;1478;1479;1480;1483;1588;1605;1674;1757;1771;1772;1938;1964;2068;2189	354;355;752;753;757;1396;1397;1398;1399;1556;1745;2172;2391;2392;2393;2394;2395;2396;2397;2398;2402;2562;2563;2564;2586;2587;2689;2690;2837;2857;2858;2859;2860;2861;3142;3180;3181;3329;3520	355;753;757;1397;1398;1556;1745;2172;2396;2397;2402;2563;2587;2690;2837;2860;3142;3180;3329;3520	43	61
sp|P11169|GTR3_HUMAN;sp|Q8TDB8|GTR14_HUMAN	sp|P11169|GTR3_HUMAN	11;5	11;5	11;5	>sp|P11169|GTR3_HUMAN Solute carrier family 2, facilitated glucose transporter member 3 OS=Homo sapiens OX=9606 GN=SLC2A3 PE=1 SV=1	2	11	11	11	11	11	11	20.8	20.8	20.8	53.924	496	496;520	0	116.28	20.8	110370000	110370000	110370000	21	21				70	37;200;201;427;1100;1101;1225;1318;1403;1404;1536	True;True;True;True;True;True;True;True;True;True;True	37;205;206;207;441;1138;1139;1275;1374;1462;1463;1464;1601	41;238;239;240;506;1325;1326;1327;1485;1593;1683;1684;1685;1686;1838	65;66;67;391;392;393;394;395;810;811;812;813;2131;2132;2133;2134;2135;2136;2404;2405;2406;2569;2570;2711;2712;2713;2714;2715;2973	67;391;395;813;2131;2134;2404;2570;2711;2715;2973	44;45	481;483
sp|P11177|ODPB_HUMAN	sp|P11177|ODPB_HUMAN	10	10	10	>sp|P11177|ODPB_HUMAN Pyruvate dehydrogenase E1 component subunit beta, mitochondrial OS=Homo sapiens OX=9606 GN=PDHB PE=1 SV=3	1	10	10	10	10	10	10	45.7	45.7	45.7	39.233	359	359	0	70.605	45.7	15181000	15181000	15181000	11	11				71	232;311;565;745;757;1567;1649;1689;1784;1807	True;True;True;True;True;True;True;True;True;True	240;321;585;770;783;1632;1720;1762;1858;1881	283;375;684;897;910;1874;1973;2098;2206;2233	464;610;611;1101;1436;1452;1453;3037;3194;3381;3551;3552;3592	464;610;1101;1436;1452;3037;3194;3381;3551;3592	46	310
sp|P11940|PABP1_HUMAN;sp|Q9H361|PABP3_HUMAN;sp|Q13310|PABP4_HUMAN	sp|P11940|PABP1_HUMAN;sp|Q9H361|PABP3_HUMAN;sp|Q13310|PABP4_HUMAN	4;2;2	4;2;2	4;2;2	>sp|P11940|PABP1_HUMAN Polyadenylate-binding protein 1 OS=Homo sapiens OX=9606 GN=PABPC1 PE=1 SV=2;>sp|Q9H361|PABP3_HUMAN Polyadenylate-binding protein 3 OS=Homo sapiens OX=9606 GN=PABPC3 PE=1 SV=2;>sp|Q13310|PABP4_HUMAN Polyadenylate-binding protein 4 OS=	3	4	4	4	4	4	4	10.5	10.5	10.5	70.67	636	636;631;644	0	30.452	10.5	5087900	5087900	5087900	6	6				72	810;1182;1430;1440	True;True;True;True	839;1228;1490;1500	974;1425;1714;1726	1554;2296;2763;2783;2784;2785	1554;2296;2763;2784
sp|P12273|PIP_HUMAN	sp|P12273|PIP_HUMAN	4	4	4	>sp|P12273|PIP_HUMAN Prolactin-inducible protein OS=Homo sapiens OX=9606 GN=PIP PE=1 SV=1	1	4	4	4	4	4	4	39.7	39.7	39.7	16.572	146	146	0	26.302	39.7	7693900	7693900	7693900	5	5				73	465;1499;1634;1894	True;True;True;True	481;1561;1701;1969	571;1791;1952;2330	935;2890;3162;3163;3747;3748	935;2890;3162;3747
sp|P12956|XRCC6_HUMAN	sp|P12956|XRCC6_HUMAN	6	6	6	>sp|P12956|XRCC6_HUMAN X-ray repair cross-complementing protein 6 OS=Homo sapiens OX=9606 GN=XRCC6 PE=1 SV=2	1	6	6	6	6	6	6	14.8	14.8	14.8	69.842	609	609	0	45.109	14.8	5157100	5157100	5157100	6	6				74	246;255;758;1176;1183;1707	True;True;True;True;True;True	254;264;784;785;1222;1229;1781	301;312;911;912;1414;1426;2122	500;515;516;1454;1455;2277;2297;2298;3423	500;516;1455;2277;2298;3423	47	167
sp|P13010|XRCC5_HUMAN	sp|P13010|XRCC5_HUMAN	9	9	9	>sp|P13010|XRCC5_HUMAN X-ray repair cross-complementing protein 5 OS=Homo sapiens OX=9606 GN=XRCC5 PE=1 SV=3	1	9	9	9	9	9	9	30.7	30.7	30.7	82.704	732	732	0	61.497	30.7	10912000	10912000	10912000	15	15				75	119;292;370;786;858;1299;1316;1531;1831	True;True;True;True;True;True;True;True;True	121;302;383;815;887;1354;1372;1596;1906	140;355;439;948;1026;1572;1591;1831;2262	242;243;244;581;706;1510;1633;2536;2537;2538;2567;2957;2958;2959;3644	244;581;706;1510;1633;2537;2567;2958;3644
sp|P13639|EF2_HUMAN	sp|P13639|EF2_HUMAN	11	11	11	>sp|P13639|EF2_HUMAN Elongation factor 2 OS=Homo sapiens OX=9606 GN=EEF2 PE=1 SV=4	1	11	11	11	11	11	11	20.4	20.4	20.4	95.337	858	858	0	73.92	20.4	11289000	11289000	11289000	14	14				76	116;304;305;369;491;856;1026;1482;1486;1757;1824	True;True;True;True;True;True;True;True;True;True;True	118;314;315;382;507;885;1061;1062;1544;1548;1831;1898	137;367;368;438;598;1024;1217;1218;1773;1777;2175;2252	237;598;599;600;705;973;1630;1936;1937;1938;2862;2868;3500;3625;3626;3627;3628	237;599;600;705;973;1630;1938;2862;2868;3500;3626	48	741
sp|P13667|PDIA4_HUMAN	sp|P13667|PDIA4_HUMAN	17	17	17	>sp|P13667|PDIA4_HUMAN Protein disulfide-isomerase A4 OS=Homo sapiens OX=9606 GN=PDIA4 PE=1 SV=2	1	17	17	17	17	17	17	36.9	36.9	36.9	72.932	645	645	0	138.02	36.9	30757000	30757000	30757000	24	24				77	191;215;347;383;392;417;418;571;687;847;1109;1296;1331;1413;1668;1779;1852	True;True;True;True;True;True;True;True;True;True;True;True;True;True;True;True;True	196;221;359;396;405;431;432;591;710;876;1147;1351;1387;1473;1739;1853;1927	228;255;414;454;465;493;494;691;826;1014;1335;1569;1606;1696;2069;2200;2285	378;418;668;669;670;729;730;748;785;786;1112;1313;1314;1613;2150;2532;2588;2589;2590;2730;3330;3541;3542;3681;3682	378;418;670;729;748;785;786;1112;1313;1613;2150;2532;2589;2730;3330;3542;3682	49	374
sp|P13804|ETFA_HUMAN	sp|P13804|ETFA_HUMAN	10	10	10	>sp|P13804|ETFA_HUMAN Electron transfer flavoprotein subunit alpha, mitochondrial OS=Homo sapiens OX=9606 GN=ETFA PE=1 SV=1	1	10	10	10	10	10	10	45.6	45.6	45.6	35.079	333	333	0	101.25	45.6	27058000	27058000	27058000	24	24				78	11;234;592;816;942;965;1023;1570;1571;1752	True;True;True;True;True;True;True;True;True;True	11;242;613;845;974;998;1058;1635;1636;1826	11;285;714;982;1122;1150;1213;1214;1877;1878;2170	14;15;16;17;466;467;468;1152;1568;1772;1824;1825;1928;1929;1930;1931;1932;3042;3043;3044;3045;3046;3047;3492	17;467;1152;1568;1772;1824;1928;3044;3047;3492
sp|P14314|GLU2B_HUMAN	sp|P14314|GLU2B_HUMAN	10	10	10	>sp|P14314|GLU2B_HUMAN Glucosidase 2 subunit beta OS=Homo sapiens OX=9606 GN=PRKCSH PE=1 SV=2	1	10	10	10	10	10	10	28	28	28	59.425	528	528	0	77.244	28	31754000	31754000	31754000	15	15				79	358;366;602;966;967;1099;1177;1383;1434;1842	True;True;True;True;True;True;True;True;True;True	370;379;624;999;1000;1137;1223;1441;1494;1917	425;435;727;728;1151;1152;1324;1415;1661;1720;2275	689;702;1173;1174;1826;1827;1828;1829;2129;2130;2278;2668;2772;3667;3668	689;702;1173;1827;1829;2130;2278;2668;2772;3667
sp|P14618|KPYM_HUMAN	sp|P14618|KPYM_HUMAN	5	5	5	>sp|P14618|KPYM_HUMAN Pyruvate kinase PKM OS=Homo sapiens OX=9606 GN=PKM PE=1 SV=4	1	5	5	5	5	5	5	17.7	17.7	17.7	57.936	531	531	0	34.995	17.7	4955900	4955900	4955900	9	9				80	416;533;584;914;1513	True;True;True;True;True	430;552;604;943;1578	492;650;704;1087;1812	783;784;1054;1131;1721;1722;1723;2925;2926	784;1054;1131;1723;2926
sp|P14625|ENPL_HUMAN;sp|Q58FF3|ENPLL_HUMAN	sp|P14625|ENPL_HUMAN	38;1	38;1	37;1	>sp|P14625|ENPL_HUMAN Endoplasmin OS=Homo sapiens OX=9606 GN=HSP90B1 PE=1 SV=1	2	38	38	37	38	38	37	51.6	51.6	50.1	92.468	803	803;399	0	323.31	51.6	197000000	197000000	197000000	66	66				81	104;206;207;274;284;288;293;296;300;308;309;312;338;364;375;445;604;674;675;739;832;902;976;984;987;1070;1135;1136;1189;1190;1364;1407;1409;1419;1520;1532;1533;1687	True;True;True;True;True;True;True;True;True;True;True;True;True;True;True;True;True;True;True;True;True;True;True;True;True;True;True;True;True;True;True;True;True;True;True;True;True;True	106;212;213;284;294;298;303;306;310;318;319;322;349;376;388;460;626;697;698;763;861;931;1009;1017;1020;1108;1178;1179;1180;1235;1236;1421;1422;1467;1469;1479;1585;1597;1598;1760	121;245;246;335;346;347;351;356;359;363;371;372;373;376;404;432;446;526;730;809;810;888;889;999;1074;1161;1169;1173;1289;1368;1369;1370;1433;1434;1435;1640;1641;1690;1692;1702;1819;1832;1833;1834;2096	205;402;403;404;405;556;570;571;575;576;582;583;586;587;593;603;604;605;606;612;653;654;698;716;717;844;1177;1281;1282;1283;1423;1424;1425;1593;1594;1699;1847;1848;1861;1862;1869;1870;2072;2073;2206;2207;2208;2209;2210;2211;2212;2213;2311;2312;2313;2314;2639;2640;2641;2721;2723;2724;2739;2935;2936;2960;2961;2962;2963;2964;2965;2966;2967;3378	205;402;405;556;571;576;582;586;593;603;604;612;654;698;716;844;1177;1282;1283;1425;1594;1699;1848;1861;1870;2073;2209;2211;2312;2314;2641;2721;2724;2739;2936;2961;2967;3378	50;51	178;425
sp|P63162|RSMN_HUMAN;sp|P14678|RSMB_HUMAN	sp|P63162|RSMN_HUMAN;sp|P14678|RSMB_HUMAN	4;4	4;4	4;4	>sp|P63162|RSMN_HUMAN Small nuclear ribonucleoprotein-associated protein N OS=Homo sapiens OX=9606 GN=SNRPN PE=1 SV=1;>sp|P14678|RSMB_HUMAN Small nuclear ribonucleoprotein-associated proteins B and B OS=Homo sapiens OX=9606 GN=SNRPB PE=1 SV=2	2	4	4	4	4	4	4	17.1	17.1	17.1	24.614	240	240;240	0	32.722	17.1	12190000	12190000	12190000	6	6				82	36;493;644;1738	True;True;True;True	36;509;666;1812	40;600;774;2154	63;64;975;976;977;1239;3468	64;976;1239;3468	52	38
sp|P14866|HNRPL_HUMAN	sp|P14866|HNRPL_HUMAN	8	8	8	>sp|P14866|HNRPL_HUMAN Heterogeneous nuclear ribonucleoprotein L OS=Homo sapiens OX=9606 GN=HNRNPL PE=1 SV=2	1	8	8	8	8	8	8	25.8	25.8	25.8	64.132	589	589	0	59.446	25.8	11474000	11474000	11474000	11	11				83	926;994;1035;1154;1211;1429;1527;1853	True;True;True;True;True;True;True;True	955;1027;1072;1200;1260;1489;1592;1928	1099;1180;1229;1391;1470;1713;1827;2286	1739;1878;1879;1960;1961;2244;2376;2762;2952;3683;3684	1739;1878;1961;2244;2376;2762;2952;3683
sp|P14923|PLAK_HUMAN	sp|P14923|PLAK_HUMAN	6	6	6	>sp|P14923|PLAK_HUMAN Junction plakoglobin OS=Homo sapiens OX=9606 GN=JUP PE=1 SV=3	1	6	6	6	6	6	6	11.1	11.1	11.1	81.744	745	745	0	64.052	11.1	8590500	8590500	8590500	9	9				84	80;665;795;1013;1014;1034	True;True;True;True;True;True	81;688;824;1047;1048;1071	88;800;957;1201;1202;1228	144;1269;1270;1522;1910;1911;1912;1958;1959	144;1270;1522;1910;1912;1959
sp|P15924|DESP_HUMAN	sp|P15924|DESP_HUMAN	17	17	17	>sp|P15924|DESP_HUMAN Desmoplakin OS=Homo sapiens OX=9606 GN=DSP PE=1 SV=3	1	17	17	17	17	17	17	8	8	8	331.77	2871	2871	0	107.62	8	19142000	19142000	19142000	16	16				85	64;113;266;367;407;502;788;998;1015;1068;1214;1292;1300;1363;1563;1591;1845	True;True;True;True;True;True;True;True;True;True;True;True;True;True;True;True;True	65;115;275;380;421;518;817;1031;1049;1106;1263;1347;1355;1420;1628;1656;1920	70;134;325;436;482;609;950;1184;1203;1287;1473;1565;1573;1639;1870;1900;2278	112;231;540;703;769;988;1512;1883;1913;2068;2379;2527;2539;2638;3031;3082;3673	112;231;540;703;769;988;1512;1883;1913;2068;2379;2527;2539;2638;3031;3082;3673
sp|P16422|EPCAM_HUMAN	sp|P16422|EPCAM_HUMAN	7	7	7	>sp|P16422|EPCAM_HUMAN Epithelial cell adhesion molecule OS=Homo sapiens OX=9606 GN=EPCAM PE=1 SV=2	1	7	7	7	7	7	7	29.3	29.3	29.3	34.932	314	314	0	46.919	29.3	14620000	14620000	14620000	10	10				86	70;868;925;1324;1358;1524;1608	True;True;True;True;True;True;True	71;897;954;1380;1415;1589;1673	76;1037;1098;1599;1634;1823;1920	121;122;1648;1737;1738;2580;2631;2632;2943;3116	121;1648;1738;2580;2631;2943;3116
sp|P16435|NCPR_HUMAN	sp|P16435|NCPR_HUMAN	7	7	7	>sp|P16435|NCPR_HUMAN NADPH--cytochrome P450 reductase OS=Homo sapiens OX=9606 GN=POR PE=1 SV=2	1	7	7	7	7	7	7	17.4	17.4	17.4	76.689	677	677	0	197.58	17.4	9675000	9675000	9675000	15	15				87	264;789;1173;1320;1356;1644;1843	True;True;True;True;True;True;True	273;818;1219;1376;1413;1714;1918	323;951;1410;1595;1632;1967;2276	533;534;535;536;537;538;1513;2271;2272;2573;2629;3185;3186;3669;3670	537;1513;2272;2573;2629;3185;3670
sp|P16615|AT2A2_HUMAN;sp|Q93084|AT2A3_HUMAN;sp|O14983|AT2A1_HUMAN	sp|P16615|AT2A2_HUMAN	5;2;1	5;2;1	5;2;1	>sp|P16615|AT2A2_HUMAN Sarcoplasmic/endoplasmic reticulum calcium ATPase 2 OS=Homo sapiens OX=9606 GN=ATP2A2 PE=1 SV=1	3	5	5	5	5	5	5	7.7	7.7	7.7	114.76	1042	1042;1043;1001	0	32.049	7.7	5538100	5538100	5538100	5	5				88	299;1448;1624;1694;1773	True;True;True;True;True	309;1508;1690;1767;1847	362;1735;1940;2104;2194	592;2800;2801;3144;3389;3529	592;2800;3144;3389;3529
sp|P18124|RL7_HUMAN	sp|P18124|RL7_HUMAN	5	5	5	>sp|P18124|RL7_HUMAN 60S ribosomal protein L7 OS=Homo sapiens OX=9606 GN=RPL7 PE=1 SV=1	1	5	5	5	5	5	5	28.2	28.2	28.2	29.225	248	248	0	31.622	28.2	10130000	10130000	10130000	7	7				89	281;818;1498;1620;1851	True;True;True;True;True	291;847;1560;1686;1926	343;985;1790;1935;1936;2284	566;1572;2889;3139;3140;3679;3680	566;1572;2889;3140;3679
sp|P19338|NUCL_HUMAN	sp|P19338|NUCL_HUMAN	7	7	7	>sp|P19338|NUCL_HUMAN Nucleolin OS=Homo sapiens OX=9606 GN=NCL PE=1 SV=3	1	7	7	7	7	7	7	13.8	13.8	13.8	76.613	710	710	0	51.274	13.8	14847000	14847000	14847000	12	12				90	280;504;552;827;1424;1529;1588	True;True;True;True;True;True;True	290;520;571;856;1484;1594;1653	342;611;670;994;1707;1829;1896;1897	565;990;991;992;1080;1586;2744;2745;2955;3077;3078;3079	565;991;1080;1586;2745;2955;3078
sp|P20674|COX5A_HUMAN	sp|P20674|COX5A_HUMAN	4	4	4	>sp|P20674|COX5A_HUMAN Cytochrome c oxidase subunit 5A, mitochondrial OS=Homo sapiens OX=9606 GN=COX5A PE=1 SV=2	1	4	4	4	4	4	4	46.7	46.7	46.7	16.762	150	150	0	25.101	46.7	5939500	5939500	5939500	5	5				91	327;538;1029;1827	True;True;True;True	338;557;1065;1901	393;655;1221;2255	636;1060;1061;1942;3632	636;1060;1942;3632
sp|P21333|FLNA_HUMAN	sp|P21333|FLNA_HUMAN	7	7	5	>sp|P21333|FLNA_HUMAN Filamin-A OS=Homo sapiens OX=9606 GN=FLNA PE=1 SV=4	1	7	7	5	7	7	5	3.7	3.7	3.1	280.74	2647	2647	0	44.474	3.7	6011000	6011000	6011000	7	7				92	209;260;787;823;1005;1369;1600	True;True;True;True;True;True;True	215;269;816;852;1039;1427;1665	248;318;949;990;1192;1646;1911	407;528;1511;1578;1897;2648;3104	407;528;1511;1578;1897;2648;3104
sp|P21796|VDAC1_HUMAN	sp|P21796|VDAC1_HUMAN	7	7	7	>sp|P21796|VDAC1_HUMAN Voltage-dependent anion-selective channel protein 1 OS=Homo sapiens OX=9606 GN=VDAC1 PE=1 SV=2	1	7	7	7	7	7	7	40.6	40.6	40.6	30.772	283	283	0	92.428	40.6	19057000	19057000	19057000	14	14				93	316;1071;1072;1390;1521;1792;1825	True;True;True;True;True;True;True	326;1109;1110;1448;1586;1866;1899	380;1290;1291;1668;1820;2216;2253	617;618;2074;2075;2681;2682;2937;2938;2939;3570;3571;3572;3629;3630	618;2074;2075;2681;2939;3572;3630
sp|P22626|ROA2_HUMAN	sp|P22626|ROA2_HUMAN	15	15	14	>sp|P22626|ROA2_HUMAN Heterogeneous nuclear ribonucleoproteins A2/B1 OS=Homo sapiens OX=9606 GN=HNRNPA2B1 PE=1 SV=2	1	15	15	14	15	15	14	56.1	56.1	56.1	37.429	353	353	0	146.46	56.1	80657000	80657000	79171000	26	26				94	291;297;503;505;506;507;520;527;863;948;954;1198;1243;1266;1577	True;True;True;True;True;True;True;True;True;True;True;True;True;True;True	301;307;519;521;522;523;537;546;892;980;987;1244;1293;1318;1642	354;360;610;612;613;614;630;644;1032;1128;1136;1137;1444;1503;1533;1884	580;588;989;993;994;995;996;1022;1023;1045;1046;1047;1640;1641;1642;1780;1795;1796;2326;2327;2328;2434;2435;2473;2474;3054	580;588;989;993;995;996;1023;1047;1642;1780;1795;2327;2434;2473;3054
sp|P23246|SFPQ_HUMAN	sp|P23246|SFPQ_HUMAN	7	7	7	>sp|P23246|SFPQ_HUMAN Splicing factor, proline- and glutamine-rich OS=Homo sapiens OX=9606 GN=SFPQ PE=1 SV=2	1	7	7	7	7	7	7	15.7	15.7	15.7	76.149	707	707	0	49.154	15.7	10951000	10951000	10951000	7	7				95	210;393;395;415;955;1197;1850	True;True;True;True;True;True;True	216;406;408;429;988;1243;1925	249;466;468;491;1138;1443;2283	408;749;751;782;1797;1798;2325;3678	408;749;751;782;1797;2325;3678
sp|P23396|RS3_HUMAN	sp|P23396|RS3_HUMAN	7	7	7	>sp|P23396|RS3_HUMAN 40S ribosomal protein S3 OS=Homo sapiens OX=9606 GN=RPS3 PE=1 SV=2	1	7	7	7	7	7	7	37.9	37.9	37.9	26.688	243	243	0	53.64	37.9	11890000	11890000	11890000	13	13				96	32;332;457;523;759;874;1530	True;True;True;True;True;True;True	32;343;473;540;786;903;1595	35;398;563;633;913;1043;1830	58;643;644;645;923;1027;1028;1456;1655;1656;1657;1658;2956	58;644;923;1028;1456;1655;2956
sp|P24752|THIL_HUMAN	sp|P24752|THIL_HUMAN	10	10	10	>sp|P24752|THIL_HUMAN Acetyl-CoA acetyltransferase, mitochondrial OS=Homo sapiens OX=9606 GN=ACAT1 PE=1 SV=1	1	10	10	10	10	10	10	42.4	42.4	42.4	45.199	427	427	0	112.19	42.4	16960000	16960000	16960000	17	17				97	286;348;385;718;815;822;1157;1260;1276;1759	True;True;True;True;True;True;True;True;True;True	296;360;398;741;844;851;1203;1312;1329;1833	349;415;456;859;980;981;989;1394;1527;1545;2177	573;671;672;732;1377;1378;1561;1562;1563;1564;1565;1566;1567;1577;2247;2465;2499;3502	573;671;732;1377;1564;1577;2247;2465;2499;3502	53	389
sp|P25705|ATPA_HUMAN	sp|P25705|ATPA_HUMAN	13	13	13	>sp|P25705|ATPA_HUMAN ATP synthase subunit alpha, mitochondrial OS=Homo sapiens OX=9606 GN=ATP5F1A PE=1 SV=1	1	13	13	13	13	13	13	33.8	33.8	33.8	59.75	553	553	0	203.52	33.8	71444000	71444000	71444000	24	24				98	287;372;401;556;609;615;749;1237;1346;1542;1552;1750;1793	True;True;True;True;True;True;True;True;True;True;True;True;True	297;385;414;575;631;637;774;1287;1403;1607;1617;1824;1867	350;442;443;474;475;674;735;743;901;1497;1622;1846;1856;2168;2217	574;709;710;711;712;758;759;760;761;762;1085;1086;1184;1194;1195;1440;2423;2613;2986;2987;3003;3489;3490;3573	574;710;760;1085;1184;1195;1440;2423;2613;2987;3003;3489;3573
sp|P26368|U2AF2_HUMAN	sp|P26368|U2AF2_HUMAN	4	4	4	>sp|P26368|U2AF2_HUMAN Splicing factor U2AF 65 kDa subunit OS=Homo sapiens OX=9606 GN=U2AF2 PE=1 SV=4	1	4	4	4	4	4	4	14.1	14.1	14.1	53.5	475	475	0	24.786	14.1	3868800	3868800	3868800	4	4				99	944;945;1158;1347	True;True;True;True	976;977;1204;1404	1124;1125;1395;1623	1775;1776;1777;2248;2614	1776;1777;2248;2614
sp|P26599|PTBP1_HUMAN	sp|P26599|PTBP1_HUMAN	5	5	5	>sp|P26599|PTBP1_HUMAN Polypyrimidine tract-binding protein 1 OS=Homo sapiens OX=9606 GN=PTBP1 PE=1 SV=1	1	5	5	5	5	5	5	17.5	17.5	17.5	57.221	531	531	0	50.465	17.5	12797000	12797000	12797000	13	13				100	680;737;1205;1737;1791	True;True;True;True;True	703;761;1254;1811;1865	815;816;885;1462;2153;2214;2215	1290;1291;1292;1293;1417;2368;3467;3564;3565;3566;3567;3568;3569	1293;1417;2368;3467;3569
sp|P27797|CALR_HUMAN	sp|P27797|CALR_HUMAN	11	11	11	>sp|P27797|CALR_HUMAN Calreticulin OS=Homo sapiens OX=9606 GN=CALR PE=1 SV=1	1	11	11	11	11	11	11	50.1	50.1	50.1	48.141	417	417	0	183.31	50.1	80816000	80816000	80816000	27	27				101	160;462;463;464;594;618;692;738;950;1287;1406	True;True;True;True;True;True;True;True;True;True;True	162;478;479;480;615;640;715;762;982;983;1341;1466	188;189;568;569;570;716;717;746;831;886;887;1130;1131;1558;1688;1689	318;319;931;932;933;934;1154;1155;1156;1157;1158;1159;1199;1200;1327;1328;1329;1330;1418;1419;1420;1421;1422;1782;1783;1784;1785;1786;1787;1788;1789;2514;2718;2719;2720	318;932;933;934;1157;1199;1327;1418;1788;2514;2719	54	122
sp|P27824|CALX_HUMAN	sp|P27824|CALX_HUMAN	17	17	17	>sp|P27824|CALX_HUMAN Calnexin OS=Homo sapiens OX=9606 GN=CANX PE=1 SV=2	1	17	17	17	17	17	17	40	40	40	67.567	592	592	0	154.55	40	70500000	70500000	70500000	26	26				102	28;69;102;153;320;589;768;853;873;1339;1546;1556;1601;1602;1607;1820;1837	True;True;True;True;True;True;True;True;True;True;True;True;True;True;True;True;True	28;70;104;155;330;609;796;882;902;1396;1611;1621;1666;1667;1672;1894;1912	31;75;119;180;384;710;924;1021;1042;1615;1850;1860;1861;1912;1913;1914;1919;2248;2268	53;54;120;201;202;203;300;301;623;1142;1143;1471;1622;1623;1624;1654;2603;2992;3009;3010;3011;3105;3106;3107;3108;3115;3620;3653	54;120;203;300;623;1143;1471;1623;1654;2603;2992;3009;3106;3108;3115;3620;3653
sp|P28799|GRN_HUMAN	sp|P28799|GRN_HUMAN	9	9	9	>sp|P28799|GRN_HUMAN Progranulin OS=Homo sapiens OX=9606 GN=GRN PE=1 SV=2	1	9	9	9	9	9	9	13.7	13.7	13.7	63.544	593	593	0	68.031	13.7	68032000	68032000	68032000	10	10				103	162;581;616;1281;1282;1284;1285;1472;1706	True;True;True;True;True;True;True;True;True	164;601;638;1334;1335;1337;1338;1339;1533;1780	194;701;744;1550;1551;1553;1554;1555;1556;1760;2121	328;329;1125;1126;1196;1197;2504;2505;2507;2508;2509;2510;2511;2512;2840;3422	329;1125;1197;2504;2505;2507;2511;2840;3422
sp|P30040|ERP29_HUMAN	sp|P30040|ERP29_HUMAN	5	5	5	>sp|P30040|ERP29_HUMAN Endoplasmic reticulum resident protein 29 OS=Homo sapiens OX=9606 GN=ERP29 PE=1 SV=4	1	5	5	5	5	5	5	19.9	19.9	19.9	28.993	261	261	0	31.652	19.9	10076000	10076000	10076000	4	4				104	472;743;1279;1280;1444	True;True;True;True;True	488;768;1332;1333;1504	579;894;1548;1549;1730	946;1433;2502;2503;2790	946;1433;2502;2503;2790
sp|P30048|PRDX3_HUMAN	sp|P30048|PRDX3_HUMAN	6	6	6	>sp|P30048|PRDX3_HUMAN Thioredoxin-dependent peroxide reductase, mitochondrial OS=Homo sapiens OX=9606 GN=PRDX3 PE=1 SV=3	1	6	6	6	6	6	6	39.8	39.8	39.8	27.692	256	256	0	53.723	39.8	54961000	54961000	54961000	17	17				105	43;90;548;639;871;1162	True;True;True;True;True;True	44;92;567;661;900;1208	48;49;104;105;666;769;1040;1399	78;79;80;81;176;177;178;179;1074;1075;1230;1231;1232;1652;2257;2258;2259	81;178;1075;1230;1652;2257
sp|P30050|RL12_HUMAN	sp|P30050|RL12_HUMAN	4	4	4	>sp|P30050|RL12_HUMAN 60S ribosomal protein L12 OS=Homo sapiens OX=9606 GN=RPL12 PE=1 SV=1	1	4	4	4	4	4	4	39.4	39.4	39.4	17.818	165	165	0	28.362	39.4	9177200	9177200	9177200	6	6				106	167;323;647;657	True;True;True;True	171;333;669;680	202;387;777;790	343;344;626;1242;1256;1257	343;626;1242;1256
sp|P30084|ECHM_HUMAN	sp|P30084|ECHM_HUMAN	7	7	7	>sp|P30084|ECHM_HUMAN Enoyl-CoA hydratase, mitochondrial OS=Homo sapiens OX=9606 GN=ECHS1 PE=1 SV=4	1	7	7	7	7	7	7	41.4	41.4	41.4	31.387	290	290	0	125.59	41.4	33020000	33020000	33020000	16	16				107	107;346;685;864;876;1206;1431	True;True;True;True;True;True;True	109;357;358;708;893;905;1255;1491	125;126;412;413;823;824;1033;1046;1463;1464;1715	210;211;212;213;666;667;1306;1307;1308;1309;1310;1311;1643;1644;1663;2369;2370;2764;2765	211;667;1310;1643;1663;2369;2765	55	103
sp|P30101|PDIA3_HUMAN	sp|P30101|PDIA3_HUMAN	19	19	19	>sp|P30101|PDIA3_HUMAN Protein disulfide-isomerase A3 OS=Homo sapiens OX=9606 GN=PDIA3 PE=1 SV=4	1	19	19	19	19	19	19	42.6	42.6	42.6	56.782	505	505	0	221.1	42.6	94464000	94464000	94464000	33	33				108	193;217;283;342;390;391;431;459;512;889;913;1110;1342;1391;1507;1537;1671;1855;1875	True;True;True;True;True;True;True;True;True;True;True;True;True;True;True;True;True;True;True	198;223;293;353;403;404;445;475;529;918;942;1148;1149;1399;1449;1570;1602;1742;1930;1950	230;257;345;408;463;464;511;565;621;1060;1061;1086;1336;1337;1618;1669;1800;1839;2073;2288;2309	380;420;569;659;660;740;741;742;743;744;745;746;747;820;926;1007;1008;1682;1683;1684;1685;1718;1719;1720;2151;2152;2153;2154;2155;2156;2157;2607;2683;2903;2974;2975;3339;3340;3687;3688;3716	380;420;569;659;742;745;820;926;1008;1685;1720;2154;2607;2683;2903;2974;3340;3688;3716	56	434
sp|P30837|AL1B1_HUMAN	sp|P30837|AL1B1_HUMAN	4	4	4	>sp|P30837|AL1B1_HUMAN Aldehyde dehydrogenase X, mitochondrial OS=Homo sapiens OX=9606 GN=ALDH1B1 PE=1 SV=3	1	4	4	4	4	4	4	14.9	14.9	14.9	57.206	517	517	0	26.936	14.9	3796600	3796600	3796600	5	5				109	7;89;897;912	True;True;True;True	7;91;926;941	7;103;1069;1085	10;174;175;1694;1717	10;175;1694;1717
sp|P31040|SDHA_HUMAN	sp|P31040|SDHA_HUMAN	13	13	13	>sp|P31040|SDHA_HUMAN Succinate dehydrogenase [ubiquinone] flavoprotein subunit, mitochondrial OS=Homo sapiens OX=9606 GN=SDHA PE=1 SV=2	1	13	13	13	13	13	13	39	39	39	72.691	664	664	0	122.41	39	21122000	21122000	21122000	22	22				110	5;52;485;490;580;668;690;957;1037;1414;1645;1704;1789	True;True;True;True;True;True;True;True;True;True;True;True;True	5;53;501;506;600;691;713;990;1074;1474;1715;1716;1778;1863	5;58;592;597;700;803;829;1140;1231;1697;1968;1969;2119;2212	6;7;8;96;963;964;972;1123;1124;1274;1322;1323;1324;1325;1801;1802;1803;1804;1964;2731;3187;3188;3189;3190;3420;3562	7;96;964;972;1123;1274;1325;1803;1964;2731;3188;3420;3562	57	279
sp|P31943|HNRH1_HUMAN;sp|P55795|HNRH2_HUMAN	sp|P31943|HNRH1_HUMAN;sp|P55795|HNRH2_HUMAN	5;3	4;2	4;2	>sp|P31943|HNRH1_HUMAN Heterogeneous nuclear ribonucleoprotein H OS=Homo sapiens OX=9606 GN=HNRNPH1 PE=1 SV=4;>sp|P55795|HNRH2_HUMAN Heterogeneous nuclear ribonucleoprotein H2 OS=Homo sapiens OX=9606 GN=HNRNPH2 PE=1 SV=1	2	5	4	4	5	4	4	19.6	17.4	17.4	49.229	449	449;449	0	72.141	19.6	11567000	11567000	11567000	7	7				111	294;663;1484;1708;1848	True;True;True;False;True	304;686;1546;1782;1923	357;797;798;1775;2123;2281	584;1265;1266;1267;2865;2866;3424;3676	584;1266;2866;3424;3676
sp|P34897|GLYM_HUMAN	sp|P34897|GLYM_HUMAN	6	6	6	>sp|P34897|GLYM_HUMAN Serine hydroxymethyltransferase, mitochondrial OS=Homo sapiens OX=9606 GN=SHMT2 PE=1 SV=3	1	6	6	6	6	6	6	15.5	15.5	15.5	55.992	504	504	0	37.222	15.5	11385000	11385000	11385000	7	7				112	42;60;87;983;1547;1902	True;True;True;True;True;True	43;61;89;1016;1612;1977	47;66;101;1168;1851;2338	77;107;172;1860;2993;2994;3758	77;107;172;1860;2994;3758
sp|P35221|CTNA1_HUMAN;sp|P26232|CTNA2_HUMAN	sp|P35221|CTNA1_HUMAN	14;2	14;2	14;2	>sp|P35221|CTNA1_HUMAN Catenin alpha-1 OS=Homo sapiens OX=9606 GN=CTNNA1 PE=1 SV=1	2	14	14	14	14	14	14	28	28	28	100.07	906	906;953	0	106.04	28	16655000	16655000	16655000	17	17				113	1;35;141;677;941;1006;1017;1144;1301;1467;1618;1714;1722;1751	True;True;True;True;True;True;True;True;True;True;True;True;True;True	1;35;143;700;973;1040;1052;1190;1356;1528;1683;1788;1796;1825	1;38;39;166;812;1121;1193;1207;1380;1574;1755;1930;2129;2137;2169	2;61;62;277;278;1285;1771;1898;1920;2229;2540;2833;3129;3130;3433;3444;3491	2;61;277;1285;1771;1898;1920;2229;2540;2833;3130;3433;3444;3491
sp|P35579|MYH9_HUMAN;sp|P35749|MYH11_HUMAN;sp|P35580|MYH10_HUMAN;sp|Q7Z406|MYH14_HUMAN	sp|P35579|MYH9_HUMAN	7;2;1;1	7;2;1;1	7;2;1;1	>sp|P35579|MYH9_HUMAN Myosin-9 OS=Homo sapiens OX=9606 GN=MYH9 PE=1 SV=4	4	7	7	7	7	7	7	4.9	4.9	4.9	226.53	1960	1960;1972;1976;1995	0	59.593	4.9	6117000	6117000	6117000	9	9				114	213;336;676;793;841;1231;1294	True;True;True;True;True;True;True	219;347;699;822;870;1281;1349	252;402;811;955;1008;1491;1567	411;412;413;649;1284;1520;1606;2415;2529	413;649;1284;1520;1606;2415;2529
sp|P36776|LONM_HUMAN	sp|P36776|LONM_HUMAN	4	4	4	>sp|P36776|LONM_HUMAN Lon protease homolog, mitochondrial OS=Homo sapiens OX=9606 GN=LONP1 PE=1 SV=2	1	4	4	4	4	4	4	9.8	9.8	9.8	106.49	959	959	0	37.261	9.8	2616200	2616200	2616200	9	9				115	197;612;826;1889	True;True;True;True	202;634;855;1964	234;235;738;993;2325	387;388;1187;1188;1583;1584;1585;3740;3741	388;1188;1583;3740
sp|P38117|ETFB_HUMAN	sp|P38117|ETFB_HUMAN	5	5	5	>sp|P38117|ETFB_HUMAN Electron transfer flavoprotein subunit beta OS=Homo sapiens OX=9606 GN=ETFB PE=1 SV=3	1	5	5	5	5	5	5	27.5	27.5	27.5	27.843	255	255	0	42.937	27.5	12189000	12189000	12189000	8	8				116	319;378;660;1067;1508	True;True;True;True;True	329;391;683;1105;1571	383;449;794;1286;1801	622;720;721;1261;2067;2904;2905;2906	622;721;1261;2067;2906
sp|P38646|GRP75_HUMAN	sp|P38646|GRP75_HUMAN	28	28	28	>sp|P38646|GRP75_HUMAN Stress-70 protein, mitochondrial OS=Homo sapiens OX=9606 GN=HSPA9 PE=1 SV=2	1	28	28	28	28	28	28	48.2	48.2	48.2	73.68	679	679	0	302.62	48.2	155980000	155980000	155980000	39	39				117	68;88;108;123;173;354;355;361;363;483;838;885;1003;1121;1149;1256;1261;1262;1366;1367;1471;1488;1621;1680;1718;1736;1767;1836	True;True;True;True;True;True;True;True;True;True;True;True;True;True;True;True;True;True;True;True;True;True;True;True;True;True;True;True	69;90;110;125;177;366;367;373;375;499;867;914;1037;1161;1195;1306;1307;1313;1314;1424;1425;1532;1550;1687;1752;1792;1810;1841;1911	74;102;127;144;208;421;422;428;431;590;1005;1056;1190;1349;1386;1519;1520;1521;1522;1528;1529;1643;1644;1759;1779;1937;2087;2088;2133;2152;2188;2267	119;173;214;215;248;352;353;685;686;693;696;697;961;1602;1678;1891;1892;1893;2174;2237;2238;2455;2456;2457;2458;2459;2460;2466;2467;2643;2644;2839;2870;2871;2872;3141;3362;3363;3438;3439;3466;3516;3517;3518;3519;3651;3652	119;173;215;248;352;685;686;693;697;961;1602;1678;1891;2174;2238;2457;2466;2467;2643;2644;2839;2870;3141;3362;3439;3466;3517;3651	58	174
sp|P38919|IF4A3_HUMAN	sp|P38919|IF4A3_HUMAN	4	4	3	>sp|P38919|IF4A3_HUMAN Eukaryotic initiation factor 4A-III OS=Homo sapiens OX=9606 GN=EIF4A3 PE=1 SV=4	1	4	4	3	4	4	3	9	9	7.1	46.871	411	411	0	25.981	9	2127800	2127800	2127800	5	5				118	262;577;860;895	True;True;True;True	271;597;889;924	321;697;1028;1067	531;1120;1635;1636;1692	531;1120;1635;1692
sp|P39019|RS19_HUMAN	sp|P39019|RS19_HUMAN	4	4	4	>sp|P39019|RS19_HUMAN 40S ribosomal protein S19 OS=Homo sapiens OX=9606 GN=RPS19 PE=1 SV=2	1	4	4	4	4	4	4	20	20	20	16.06	145	145	0	24.547	20	4041000	4041000	4041000	4	4				119	263;1168;1365;1746	True;True;True;True	272;1214;1423;1820	322;1405;1642;2163	532;2266;2642;3481	532;2266;2642;3481
sp|P39656|OST48_HUMAN	sp|P39656|OST48_HUMAN	5	5	5	>sp|P39656|OST48_HUMAN Dolichyl-diphosphooligosaccharide--protein glycosyltransferase 48 kDa subunit OS=Homo sapiens OX=9606 GN=DDOST PE=1 SV=4	1	5	5	5	5	5	5	21.5	21.5	21.5	50.8	456	456	0	35.145	21.5	11688000	11688000	11688000	5	5				120	977;1477;1515;1712;1891	True;True;True;True;True	1010;1538;1580;1786;1966	1162;1766;1814;2127;2327	1849;2850;2929;3430;3744	1849;2850;2929;3430;3744
sp|P40926|MDHM_HUMAN	sp|P40926|MDHM_HUMAN	12	12	12	>sp|P40926|MDHM_HUMAN Malate dehydrogenase, mitochondrial OS=Homo sapiens OX=9606 GN=MDH2 PE=1 SV=3	1	12	12	12	12	12	12	43.5	43.5	43.5	35.503	338	338	0	184.42	43.5	65555000	65555000	65555000	22	22				121	45;94;313;458;484;610;778;1073;1118;1465;1466;1673	True;True;True;True;True;True;True;True;True;True;True;True	46;96;323;474;500;632;807;1111;1158;1526;1527;1744	51;109;377;564;591;736;937;1292;1293;1346;1753;1754;2075;2076;2077;2078	83;84;185;613;924;925;962;1185;1494;1495;2076;2077;2170;2171;2829;2830;2831;2832;3343;3344;3345;3346	84;185;613;925;962;1185;1495;2077;2171;2830;2831;3346
sp|P40939|ECHA_HUMAN	sp|P40939|ECHA_HUMAN	14	14	14	>sp|P40939|ECHA_HUMAN Trifunctional enzyme subunit alpha, mitochondrial OS=Homo sapiens OX=9606 GN=HADHA PE=1 SV=2	1	14	14	14	14	14	14	27.3	27.3	27.3	82.999	763	763	0	124.4	27.3	27355000	27355000	27355000	23	23				122	22;179;196;245;258;374;408;412;632;752;1126;1545;1585;1629	True;True;True;True;True;True;True;True;True;True;True;True;True;True	22;184;201;253;267;387;422;426;654;777;1167;1610;1650;1695	24;25;215;233;300;316;445;483;488;762;904;1355;1849;1893;1945;1946	37;38;39;40;363;386;499;524;525;715;770;777;778;779;1222;1443;2180;2181;2991;3074;3150;3151;3152	38;363;386;499;524;715;770;777;1222;1443;2180;2991;3074;3152
sp|P42704|LPPRC_HUMAN	sp|P42704|LPPRC_HUMAN	25	25	25	>sp|P42704|LPPRC_HUMAN Leucine-rich PPR motif-containing protein, mitochondrial OS=Homo sapiens OX=9606 GN=LRPPRC PE=1 SV=3	1	25	25	25	25	25	25	27.9	27.9	27.9	157.9	1394	1394	0	303.6	27.9	46124000	46124000	46124000	46	46				123	65;156;168;218;328;352;488;514;555;569;779;911;980;1012;1139;1204;1238;1454;1455;1497;1504;1574;1627;1635;1812	True;True;True;True;True;True;True;True;True;True;True;True;True;True;True;True;True;True;True;True;True;True;True;True;True	66;158;172;224;339;364;504;531;574;589;808;940;1013;1046;1185;1253;1288;1514;1515;1516;1559;1567;1639;1693;1702;1886	71;183;184;203;258;394;419;595;623;673;688;689;938;1084;1165;1200;1375;1461;1498;1741;1742;1743;1789;1797;1881;1943;1953;2238	113;304;305;306;307;308;309;345;421;422;637;638;680;681;967;968;969;970;1011;1012;1084;1109;1110;1496;1713;1714;1715;1716;1854;1855;1908;1909;2219;2220;2367;2424;2425;2810;2811;2812;2813;2814;2888;2898;2899;3051;3147;3148;3164;3165;3599	113;307;345;421;638;680;968;1012;1084;1109;1496;1715;1854;1909;2219;2367;2425;2811;2814;2888;2898;3051;3148;3164;3599	59;60	465;552
sp|P42765|THIM_HUMAN	sp|P42765|THIM_HUMAN	6	6	6	>sp|P42765|THIM_HUMAN 3-ketoacyl-CoA thiolase, mitochondrial OS=Homo sapiens OX=9606 GN=ACAA2 PE=1 SV=2	1	6	6	6	6	6	6	32.7	32.7	32.7	41.924	397	397	0	58.393	32.7	10963000	10963000	10963000	9	9				124	8;199;275;804;1597;1778	True;True;True;True;True;True	8;204;285;833;1662;1852	8;237;336;967;1907;1908;2199	11;390;557;1539;3098;3099;3100;3539;3540	11;390;557;1539;3100;3539
sp|P43243|MATR3_HUMAN	sp|P43243|MATR3_HUMAN	6	6	6	>sp|P43243|MATR3_HUMAN Matrin-3 OS=Homo sapiens OX=9606 GN=MATR3 PE=1 SV=2	1	6	6	6	6	6	6	11.7	11.7	11.7	94.622	847	847	0	38.862	11.7	8935900	8935900	8935900	10	10				125	219;558;712;1234;1395;1883	True;True;True;True;True;True	225;578;735;1284;1453;1958	259;677;853;1494;1673;2318	423;1089;1090;1091;1365;1366;2419;2688;3728;3729	423;1089;1366;2419;2688;3729
sp|P46777|RL5_HUMAN	sp|P46777|RL5_HUMAN	5	5	5	>sp|P46777|RL5_HUMAN 60S ribosomal protein L5 OS=Homo sapiens OX=9606 GN=RPL5 PE=1 SV=3	1	5	5	5	5	5	5	21.5	21.5	21.5	34.362	297	297	0	28.351	21.5	4157800	4157800	4157800	5	5				126	302;481;627;1702;1876	True;True;True;True;True	312;497;649;1776;1951	365;588;756;2117;2310	595;959;1214;3418;3717	595;959;1214;3418;3717
sp|P48047|ATPO_HUMAN	sp|P48047|ATPO_HUMAN	6	6	6	>sp|P48047|ATPO_HUMAN ATP synthase subunit O, mitochondrial OS=Homo sapiens OX=9606 GN=ATP5PO PE=1 SV=1	1	6	6	6	6	6	6	38.5	38.5	38.5	23.277	213	213	0	55.856	38.5	19482000	19482000	19482000	9	9				127	496;1061;1394;1651;1660;1835	True;True;True;True;True;True	512;1099;1452;1722;1731;1910	603;1257;1672;1975;1984;2266	980;981;2009;2687;3196;3211;3648;3649;3650	980;2009;2687;3196;3211;3649
sp|P49411|EFTU_HUMAN	sp|P49411|EFTU_HUMAN	6	6	6	>sp|P49411|EFTU_HUMAN Elongation factor Tu, mitochondrial OS=Homo sapiens OX=9606 GN=TUFM PE=1 SV=2	1	6	6	6	6	6	6	16.8	16.8	16.8	49.541	452	452	0	41.417	16.8	8421400	8421400	8421400	6	6				128	25;542;593;671;845;1840	True;True;True;True;True;True	25;561;614;694;874;1915	28;659;715;806;1012;2271	47;1065;1153;1277;1611;3659	47;1065;1153;1277;1611;3659
sp|P49419|AL7A1_HUMAN	sp|P49419|AL7A1_HUMAN	5	5	5	>sp|P49419|AL7A1_HUMAN Alpha-aminoadipic semialdehyde dehydrogenase OS=Homo sapiens OX=9606 GN=ALDH7A1 PE=1 SV=5	1	5	5	5	5	5	5	16	16	16	58.486	539	539	0	42.249	16	6230700	6230700	6230700	6	6				129	477;495;1259;1343;1733	True;True;True;True;True	493;511;1311;1400;1807	584;602;1526;1619;2149	953;979;2464;2608;3462;3463	953;979;2464;2608;3462
sp|P50454|SERPH_HUMAN	sp|P50454|SERPH_HUMAN	12	12	12	>sp|P50454|SERPH_HUMAN Serpin H1 OS=Homo sapiens OX=9606 GN=SERPINH1 PE=1 SV=2	1	12	12	12	12	12	12	45.5	45.5	45.5	46.44	418	418	0	116.45	45.5	63306000	63306000	63306000	23	23				130	139;140;224;236;630;631;1064;1102;1370;1503;1522;1548	True;True;True;True;True;True;True;True;True;True;True;True	141;142;231;244;652;653;1102;1140;1428;1565;1566;1587;1613	164;165;267;288;289;760;761;1260;1328;1647;1795;1796;1821;1852	274;275;276;438;439;440;471;472;473;474;475;476;477;1220;1221;2015;2016;2137;2138;2649;2650;2896;2897;2940;2995	274;276;438;473;1220;1221;2016;2138;2650;2897;2940;2995	61;62	236;237
sp|P50995|ANX11_HUMAN;sp|P27216|ANX13_HUMAN	sp|P50995|ANX11_HUMAN	6;1	6;1	6;1	>sp|P50995|ANX11_HUMAN Annexin A11 OS=Homo sapiens OX=9606 GN=ANXA11 PE=1 SV=1	2	6	6	6	6	6	6	15.4	15.4	15.4	54.389	505	505;316	0	42.8	15.4	7191400	7191400	7191400	8	8				131	61;510;599;1388;1393;1453	True;True;True;True;True;True	62;526;620;1446;1451;1513	67;618;723;1666;1671;1740	108;1001;1168;2679;2686;2807;2808;2809	108;1001;1168;2679;2686;2809
sp|P51148|RAB5C_HUMAN	sp|P51148|RAB5C_HUMAN	7	7	5	>sp|P51148|RAB5C_HUMAN Ras-related protein Rab-5C OS=Homo sapiens OX=9606 GN=RAB5C PE=1 SV=2	1	7	7	5	7	7	5	53.7	53.7	44	23.482	216	216	0	78.018	53.7	13104000	13104000	13104000	10	10				132	135;478;574;596;1087;1156;1856	True;True;True;True;True;True;True	137;494;594;617;1125;1202;1931	158;585;694;720;1308;1393;2289	268;954;955;956;1116;1162;1163;2104;2246;3689	268;954;1116;1163;2104;2246;3689
sp|P51149|RAB7A_HUMAN	sp|P51149|RAB7A_HUMAN	8	8	8	>sp|P51149|RAB7A_HUMAN Ras-related protein Rab-7a OS=Homo sapiens OX=9606 GN=RAB7A PE=1 SV=1	1	8	8	8	8	8	8	43.5	43.5	43.5	23.489	207	207	0	100.37	43.5	24036000	24036000	24036000	14	14				133	235;279;468;1098;1326;1614;1615;1715	True;True;True;True;True;True;True;True	243;289;484;1136;1382;1679;1680;1789	286;287;340;341;574;1323;1601;1926;1927;2130	469;470;562;563;564;939;940;2127;2128;2582;3125;3126;3434;3435	470;563;939;2128;2582;3125;3126;3435
sp|P51610|HCFC1_HUMAN;sp|Q9Y5Z7|HCFC2_HUMAN	sp|P51610|HCFC1_HUMAN	40;1	40;1	40;1	>sp|P51610|HCFC1_HUMAN Host cell factor 1 OS=Homo sapiens OX=9606 GN=HCFC1 PE=1 SV=2	2	40	40	40	40	40	40	28.8	28.8	28.8	208.73	2035	2035;792	0	323.31	28.8	183150000	183150000	180580000	82	82				134	95;103;142;170;222;349;356;357;476;486;560;564;590;607;659;682;772;806;877;968;1018;1085;1143;1245;1251;1265;1352;1441;1462;1479;1505;1661;1755;1756;1785;1786;1799;1809;1838;1888	True;True;True;True;True;True;True;True;True;True;True;True;True;True;True;True;True;True;True;True;True;True;True;True;True;True;True;True;True;True;True;True;True;True;True;True;True;True;True;True	97;105;144;174;228;361;368;369;492;502;580;584;610;611;629;682;705;800;835;906;1001;1053;1123;1189;1295;1301;1317;1409;1501;1523;1541;1568;1732;1829;1830;1859;1860;1873;1883;1913;1963	110;111;120;167;205;262;263;416;423;424;583;593;679;683;711;712;733;793;818;819;820;928;970;1047;1153;1208;1306;1379;1505;1511;1532;1628;1727;1750;1769;1798;1985;2173;2174;2207;2208;2224;2235;2269;2324	186;187;188;204;279;280;347;430;431;432;673;674;675;687;688;950;951;952;965;1093;1094;1099;1100;1144;1145;1146;1147;1148;1149;1150;1180;1181;1260;1295;1296;1297;1298;1299;1300;1301;1302;1303;1479;1480;1481;1482;1545;1546;1547;1664;1665;1830;1831;1921;2102;2226;2227;2228;2437;2447;2471;2472;2623;2786;2787;2825;2826;2854;2900;3212;3213;3214;3215;3216;3496;3497;3498;3499;3553;3554;3555;3582;3583;359…	187;204;280;347;431;674;687;688;951;965;1093;1099;1144;1180;1260;1300;1481;1546;1664;1831;1921;2102;2228;2437;2447;2472;2623;2787;2825;2854;2900;3215;3497;3498;3553;3555;3583;3595;3656;3738	63	1824
sp|P51649|SSDH_HUMAN	sp|P51649|SSDH_HUMAN	5	5	5	>sp|P51649|SSDH_HUMAN Succinate-semialdehyde dehydrogenase, mitochondrial OS=Homo sapiens OX=9606 GN=ALDH5A1 PE=1 SV=2	1	5	5	5	5	5	5	16.6	16.6	16.6	57.214	535	535	0	42.026	16.6	4599000	4599000	4599000	9	9				135	377;734;1233;1703;1777	True;True;True;True;True	390;757;1283;1777;1851	448;879;1493;2118;2198	719;1406;2417;2418;3419;3535;3536;3537;3538	719;1406;2417;3419;3536
sp|P51659|DHB4_HUMAN	sp|P51659|DHB4_HUMAN	12	12	12	>sp|P51659|DHB4_HUMAN Peroxisomal multifunctional enzyme type 2 OS=Homo sapiens OX=9606 GN=HSD17B4 PE=1 SV=3	1	12	12	12	12	12	12	27.9	27.9	27.9	79.685	736	736	0	92.569	27.9	18714000	18714000	18714000	15	15				136	130;132;466;693;883;974;1050;1664;1739;1749;1766;1805	True;True;True;True;True;True;True;True;True;True;True;True	132;134;482;716;912;1007;1088;1735;1813;1823;1840;1879	152;154;572;832;1054;1159;1245;2065;2155;2156;2167;2187;2231	261;263;264;936;1331;1676;1843;1844;1987;3325;3469;3470;3488;3515;3590	261;264;936;1331;1676;1844;1987;3325;3469;3488;3515;3590
sp|P51991|ROA3_HUMAN	sp|P51991|ROA3_HUMAN	6	6	6	>sp|P51991|ROA3_HUMAN Heterogeneous nuclear ribonucleoprotein A3 OS=Homo sapiens OX=9606 GN=HNRNPA3 PE=1 SV=2	1	6	6	6	6	6	6	25.1	25.1	25.1	39.594	378	378	0	42.201	25.1	10462000	10462000	10462000	8	8				137	509;704;861;946;1476;1857	True;True;True;True;True;True	525;727;890;978;1537;1932	617;845;1029;1126;1765;2290	1000;1356;1637;1778;2847;2848;2849;3690	1000;1356;1637;1778;2849;3690
sp|P52272|HNRPM_HUMAN	sp|P52272|HNRPM_HUMAN	5	5	5	>sp|P52272|HNRPM_HUMAN Heterogeneous nuclear ribonucleoprotein M OS=Homo sapiens OX=9606 GN=HNRNPM PE=1 SV=3	1	5	5	5	5	5	5	11.5	11.5	11.5	77.515	730	730	0	34.063	11.5	6838000	6838000	6838000	5	5				138	20;39;534;1114;1277	True;True;True;True;True	20;39;553;1153;1330	21;43;651;1341;1546	31;32;69;70;1055;2163;2500	32;69;1055;2163;2500	64;65	274;607
sp|P52597|HNRPF_HUMAN	sp|P52597|HNRPF_HUMAN	6	6	5	>sp|P52597|HNRPF_HUMAN Heterogeneous nuclear ribonucleoprotein F OS=Homo sapiens OX=9606 GN=HNRNPF PE=1 SV=3	1	6	6	5	6	6	5	25.1	25.1	22.7	45.671	415	415	0	72.806	25.1	18859000	18859000	18859000	9	9				139	295;658;809;1307;1708;1849	True;True;True;True;True;True	305;681;838;1362;1782;1924	358;791;792;973;1580;2123;2282	585;1258;1259;1552;1553;2547;2548;3424;3677	585;1258;1553;2547;3424;3677
sp|P53992|SC24C_HUMAN	sp|P53992|SC24C_HUMAN	5	5	5	>sp|P53992|SC24C_HUMAN Protein transport protein Sec24C OS=Homo sapiens OX=9606 GN=SEC24C PE=1 SV=3	1	5	5	5	5	5	5	6.7	6.7	6.7	118.32	1094	1094	0	38.801	6.7	3481900	3481900	3481900	6	6				140	137;1382;1464;1578;1833	True;True;True;True;True	139;1440;1525;1643;1908	161;162;1660;1752;1885;2264	271;272;2667;2828;3055;3646	271;2667;2828;3055;3646
sp|P54886|P5CS_HUMAN	sp|P54886|P5CS_HUMAN	16	16	16	>sp|P54886|P5CS_HUMAN Delta-1-pyrroline-5-carboxylate synthase OS=Homo sapiens OX=9606 GN=ALDH18A1 PE=1 SV=2	1	16	16	16	16	16	16	28.4	28.4	28.4	87.301	795	795	0	142.2	28.4	31810000	31810000	31810000	26	26				141	31;154;285;545;570;917;981;1053;1117;1122;1257;1286;1526;1606;1774;1874	True;True;True;True;True;True;True;True;True;True;True;True;True;True;True;True	31;156;295;564;590;946;1014;1091;1157;1162;1308;1340;1591;1671;1848;1949	34;181;348;662;663;690;1090;1166;1248;1345;1350;1523;1557;1825;1826;1918;2195;2308	57;302;572;1068;1069;1111;1727;1856;1857;1991;1992;2168;2169;2175;2461;2513;2945;2946;2947;2948;2949;2950;2951;3112;3113;3114;3530;3715	57;302;572;1068;1111;1727;1856;1991;2169;2175;2461;2513;2946;3113;3530;3715	66	376
sp|P55072|TERA_HUMAN	sp|P55072|TERA_HUMAN	4	4	4	>sp|P55072|TERA_HUMAN Transitional endoplasmic reticulum ATPase OS=Homo sapiens OX=9606 GN=VCP PE=1 SV=4	1	4	4	4	4	4	4	6.8	6.8	6.8	89.321	806	806	0	25.562	6.8	3554300	3554300	3554300	4	4				142	528;933;1148;1816	True;True;True;True	547;963;1194;1890	645;1108;1385;2242	1048;1749;2236;3607	1048;1749;2236;3607
sp|P55084|ECHB_HUMAN	sp|P55084|ECHB_HUMAN	5	5	5	>sp|P55084|ECHB_HUMAN Trifunctional enzyme subunit beta, mitochondrial OS=Homo sapiens OX=9606 GN=HADHB PE=1 SV=3	1	5	5	5	5	5	5	15	15	15	51.294	474	474	0	30.618	15	8682900	8682900	8682900	11	11				143	226;239;435;940;1239	True;True;True;True;True	234;247;449;972;1289	276;294;515;1120;1499	451;487;488;825;826;827;1767;1768;1769;1770;2426	451;488;827;1768;2426
sp|P60174|TPIS_HUMAN	sp|P60174|TPIS_HUMAN	6	6	6	>sp|P60174|TPIS_HUMAN Triosephosphate isomerase OS=Homo sapiens OX=9606 GN=TPI1 PE=1 SV=3	1	6	6	6	6	6	6	30.8	30.8	30.8	30.791	286	286	0	41.355	30.8	7537600	7537600	7537600	8	8				144	683;1456;1514;1656;1761;1801	True;True;True;True;True;True	706;1517;1579;1727;1835;1875	821;1744;1813;1980;2179;2226	1304;2815;2816;2927;2928;3205;3505;3585	1304;2816;2928;3205;3505;3585
sp|P63261|ACTG_HUMAN;sp|P60709|ACTB_HUMAN;sp|Q6S8J3|POTEE_HUMAN;sp|A5A3E0|POTEF_HUMAN;sp|Q9BYX7|ACTBM_HUMAN;sp|P0CG39|POTEJ_HUMAN;sp|P0CG38|POTEI_HUMAN	sp|P63261|ACTG_HUMAN;sp|P60709|ACTB_HUMAN	22;22;7;5;4;4;4	22;22;7;5;4;4;4	11;11;4;2;2;2;2	>sp|P63261|ACTG_HUMAN Actin, cytoplasmic 2 OS=Homo sapiens OX=9606 GN=ACTG1 PE=1 SV=1;>sp|P60709|ACTB_HUMAN Actin, cytoplasmic 1 OS=Homo sapiens OX=9606 GN=ACTB PE=1 SV=1	7	22	22	11	22	22	11	65.3	65.3	39.7	41.792	375	375;375;1075;1075;375;1038;1075	0	323.31	65.3	264070000	264070000	263270000	25	25				145	49;149;163;220;223;250;251;325;330;447;613;654;722;829;837;927;1125;1269;1270;1502;1619;1659	True;True;True;True;True;True;True;True;True;True;True;True;True;True;True;True;True;True;True;True;True;True	50;151;165;166;167;226;229;230;259;260;335;336;341;462;463;635;676;677;745;858;866;956;1166;1321;1322;1323;1564;1684;1685;1730	55;174;195;196;197;198;260;264;265;266;307;308;390;391;396;528;529;739;740;741;786;787;865;996;1004;1100;1101;1354;1536;1537;1538;1539;1794;1931;1932;1933;1934;1983	90;91;92;291;330;331;332;333;334;335;336;337;338;424;433;434;435;436;437;508;509;510;511;629;630;631;632;641;846;847;1189;1190;1191;1192;1251;1252;1253;1387;1589;1590;1601;1740;1741;1742;2179;2480;2481;2482;2483;2484;2485;2486;2487;2488;2489;2490;2491;2893;2894;2895;3131;3132;3133;3134;3135;3136;3137;3138;3209;3210	91;291;337;424;435;509;511;631;641;847;1190;1252;1387;1590;1601;1741;2179;2482;2491;2895;3136;3209	67;68;69;70;71;72	44;153;269;283;305;325
sp|P60953|CDC42_HUMAN;sp|P84095|RHOG_HUMAN;sp|P17081|RHOQ_HUMAN;sp|Q9H4E5|RHOJ_HUMAN	sp|P60953|CDC42_HUMAN	4;1;1;1	4;1;1;1	3;0;0;0	>sp|P60953|CDC42_HUMAN Cell division control protein 42 homolog OS=Homo sapiens OX=9606 GN=CDC42 PE=1 SV=2	4	4	4	3	4	4	3	23.6	23.6	17.8	21.258	191	191;191;205;214	0	29.855	23.6	7683300	7683300	7683300	3	3				146	169;1291;1605;1899	True;True;True;True	173;1346;1670;1974	204;1564;1917;2335	346;2526;3111;3754	346;2526;3111;3754
sp|P61006|RAB8A_HUMAN;sp|P51153|RAB13_HUMAN;sp|Q92930|RAB8B_HUMAN;sp|P59190|RAB15_HUMAN;sp|P20337|RAB3B_HUMAN;sp|O95716|RAB3D_HUMAN;sp|P20336|RAB3A_HUMAN;sp|Q96E17|RAB3C_HUMAN	sp|P61006|RAB8A_HUMAN	5;2;2;1;1;1;1;1	4;1;1;0;1;1;1;1	4;1;1;0;1;1;1;1	>sp|P61006|RAB8A_HUMAN Ras-related protein Rab-8A OS=Homo sapiens OX=9606 GN=RAB8A PE=1 SV=1	8	5	4	4	5	4	4	28.5	23.2	23.2	23.668	207	207;203;207;212;219;219;220;227	0	29.995	28.5	5267700	5267700	5267700	5	5				147	91;938;1009;1172;1569	True;True;False;True;True	93;970;1043;1218;1634	106;1118;1197;1409;1876	180;1764;1765;1904;2270;3041	180;1765;1904;2270;3041
sp|P84077|ARF1_HUMAN;sp|P61204|ARF3_HUMAN;sp|P84085|ARF5_HUMAN	sp|P84077|ARF1_HUMAN;sp|P61204|ARF3_HUMAN;sp|P84085|ARF5_HUMAN	4;4;3	4;4;3	2;2;1	>sp|P84077|ARF1_HUMAN ADP-ribosylation factor 1 OS=Homo sapiens OX=9606 GN=ARF1 PE=1 SV=2;>sp|P61204|ARF3_HUMAN ADP-ribosylation factor 3 OS=Homo sapiens OX=9606 GN=ARF3 PE=1 SV=2;>sp|P84085|ARF5_HUMAN ADP-ribosylation factor 5 OS=Homo sapiens OX=9606 GN=A	3	4	4	2	4	4	2	30.9	30.9	13.3	20.697	181	181;181;180	0	24.312	30.9	6468900	6468900	6468900	3	3				148	182;750;961;1175	True;True;True;True	187;775;994;1221	218;902;1146;1413	366;1441;1818;2276	366;1441;1818;2276	73	22
sp|P61247|RS3A_HUMAN	sp|P61247|RS3A_HUMAN	4	4	4	>sp|P61247|RS3A_HUMAN 40S ribosomal protein S3a OS=Homo sapiens OX=9606 GN=RPS3A PE=1 SV=2	1	4	4	4	4	4	4	20.5	20.5	20.5	29.945	264	264	0	23.42	20.5	3723500	3723500	3723500	5	5				149	18;892;1025;1685	True;True;True;True	18;921;1060;1758	19;1064;1216;2094	28;1688;1934;1935;3375	28;1688;1934;3375
sp|P61313|RL15_HUMAN	sp|P61313|RL15_HUMAN	4	4	4	>sp|P61313|RL15_HUMAN 60S ribosomal protein L15 OS=Homo sapiens OX=9606 GN=RPL15 PE=1 SV=2	1	4	4	4	4	4	4	22.5	22.5	22.5	24.146	204	204	0	25.219	22.5	7869800	7869800	7869800	4	4				150	480;1451;1743;1867	True;True;True;True	496;1511;1817;1942	587;1738;2160;2301	958;2805;3476;3706	958;2805;3476;3706
sp|P61586|RHOA_HUMAN;sp|P08134|RHOC_HUMAN;sp|P62745|RHOB_HUMAN	sp|P61586|RHOA_HUMAN;sp|P08134|RHOC_HUMAN;sp|P62745|RHOB_HUMAN	4;3;2	4;3;2	4;3;2	>sp|P61586|RHOA_HUMAN Transforming protein RhoA OS=Homo sapiens OX=9606 GN=RHOA PE=1 SV=1;>sp|P08134|RHOC_HUMAN Rho-related GTP-binding protein RhoC OS=Homo sapiens OX=9606 GN=RHOC PE=1 SV=1;>sp|P62745|RHOB_HUMAN Rho-related GTP-binding protein RhoB OS=Hom	3	4	4	4	4	4	4	31.6	31.6	31.6	21.768	193	193;193;196	0	26.964	31.6	6845100	6845100	6845100	7	7				151	238;1084;1315;1519	True;True;True;True	246;1122;1371;1584	292;293;1305;1590;1818	483;484;485;486;2101;2566;2934	484;2101;2566;2934
sp|P61604|CH10_HUMAN	sp|P61604|CH10_HUMAN	8	8	8	>sp|P61604|CH10_HUMAN 10 kDa heat shock protein, mitochondrial OS=Homo sapiens OX=9606 GN=HSPE1 PE=1 SV=2	1	8	8	8	8	8	8	61.8	61.8	61.8	10.932	102	102	0	122.94	61.8	199580000	199580000	198790000	15	15				152	430;518;546;842;1742;1748;1802;1803	True;True;True;True;True;True;True;True	444;535;565;871;1816;1822;1876;1877	510;627;664;1009;2159;2165;2166;2227;2228;2229	819;1016;1017;1070;1071;1072;1607;3473;3474;3475;3485;3486;3487;3586;3587;3588	819;1017;1072;1607;3474;3486;3586;3588
sp|P61964|WDR5_HUMAN	sp|P61964|WDR5_HUMAN	5	5	5	>sp|P61964|WDR5_HUMAN WD repeat-containing protein 5 OS=Homo sapiens OX=9606 GN=WDR5 PE=1 SV=1	1	5	5	5	5	5	5	23.7	23.7	23.7	36.588	334	334	0	33.44	23.7	8369600	8369600	8369600	7	7				153	198;828;971;1583;1865	True;True;True;True;True	203;857;1004;1648;1940	236;995;1156;1891;2299	389;1587;1588;1835;3071;3072;3704	389;1587;1835;3071;3704
sp|P61978|HNRPK_HUMAN	sp|P61978|HNRPK_HUMAN	13	13	13	>sp|P61978|HNRPK_HUMAN Heterogeneous nuclear ribonucleoprotein K OS=Homo sapiens OX=9606 GN=HNRNPK PE=1 SV=1	1	13	13	13	13	13	13	33.7	33.7	33.7	50.976	463	463	0	115.32	33.7	40398000	40398000	40398000	23	23				154	517;579;586;619;688;689;726;736;754;951;1193;1230;1528	True;True;True;True;True;True;True;True;True;True;True;True;True	534;599;606;641;711;712;749;760;779;984;1239;1280;1593	626;699;706;747;827;828;870;884;906;1132;1133;1438;1490;1828	1015;1122;1134;1201;1315;1316;1317;1318;1319;1320;1321;1394;1416;1445;1446;1790;1791;2317;2318;2413;2414;2953;2954	1015;1122;1134;1201;1319;1321;1394;1416;1446;1791;2318;2414;2953
sp|P62258|1433E_HUMAN	sp|P62258|1433E_HUMAN	6	6	5	>sp|P62258|1433E_HUMAN 14-3-3 protein epsilon OS=Homo sapiens OX=9606 GN=YWHAE PE=1 SV=1	1	6	6	5	6	6	5	38.8	38.8	38.8	29.174	255	255	0	45.919	38.8	5537700	5537700	5537700	7	7				155	4;231;249;270;907;1871	True;True;True;True;True;True	4;239;258;280;936;1946	4;282;306;331;1079;2305	5;461;462;463;507;551;1705;3711	5;462;507;551;1705;3711	74	221
sp|P62269|RS18_HUMAN	sp|P62269|RS18_HUMAN	4	4	4	>sp|P62269|RS18_HUMAN 40S ribosomal protein S18 OS=Homo sapiens OX=9606 GN=RPS18 PE=1 SV=3	1	4	4	4	4	4	4	26.3	26.3	26.3	17.718	152	152	0	26.112	26.3	5475800	5475800	5475800	6	6				156	47;769;1744;1892	True;True;True;True	48;797;1818;1967	53;925;2161;2328	87;88;1472;1473;3477;3745	88;1472;3477;3745
sp|P62424|RL7A_HUMAN	sp|P62424|RL7A_HUMAN	6	6	6	>sp|P62424|RL7A_HUMAN 60S ribosomal protein L7a OS=Homo sapiens OX=9606 GN=RPL7A PE=1 SV=2	1	6	6	6	6	6	6	27.1	27.1	27.1	29.995	266	266	0	45.718	27.1	11191000	11191000	11191000	7	7				157	57;58;669;887;995;1160	True;True;True;True;True;True	58;59;692;916;1028;1206	63;64;804;1058;1181;1397	104;105;1275;1680;1880;2252;2253	104;105;1275;1680;1880;2252
sp|P62491|RB11A_HUMAN;sp|Q15907|RB11B_HUMAN	sp|P62491|RB11A_HUMAN;sp|Q15907|RB11B_HUMAN	4;4	4;4	4;4	>sp|P62491|RB11A_HUMAN Ras-related protein Rab-11A OS=Homo sapiens OX=9606 GN=RAB11A PE=1 SV=3;>sp|Q15907|RB11B_HUMAN Ras-related protein Rab-11B OS=Homo sapiens OX=9606 GN=RAB11B PE=1 SV=4	2	4	4	4	4	4	4	20.8	20.8	20.8	24.393	216	216;218	0	25.562	20.8	9104000	9104000	9104000	4	4				158	112;482;1485;1804	True;True;True;True	114;498;1547;1878	133;589;1776;2230	230;960;2867;3589	230;960;2867;3589
sp|P62701|RS4X_HUMAN;sp|Q8TD47|RS4Y2_HUMAN;sp|P22090|RS4Y1_HUMAN	sp|P62701|RS4X_HUMAN	4;1;1	4;1;1	4;1;1	>sp|P62701|RS4X_HUMAN 40S ribosomal protein S4, X isoform OS=Homo sapiens OX=9606 GN=RPS4X PE=1 SV=2	3	4	4	4	4	4	4	20.2	20.2	20.2	29.597	263	263;263;263	0	28.56	20.2	5008400	5008400	5008400	5	5				159	177;399;1060;1523	True;True;True;True	182;412;1098;1588	213;472;1256;1822	359;756;2008;2941;2942	359;756;2008;2942
sp|P62805|H4_HUMAN	sp|P62805|H4_HUMAN	9	9	9	>sp|P62805|H4_HUMAN Histone H4 OS=Homo sapiens OX=9606 GN=HIST1H4A PE=1 SV=2	1	9	9	9	9	9	9	60.2	60.2	60.2	11.367	103	103	0	126.32	60.2	183180000	183180000	183180000	16	16				160	183;229;230;800;893;1590;1639;1640;1688	True;True;True;True;True;True;True;True;True	188;237;238;829;922;1655;1707;1708;1709;1710;1761	219;279;280;281;963;1065;1899;1959;1960;1961;1962;1963;2097	367;368;369;455;456;457;458;459;460;1531;1532;1533;1689;3081;3174;3175;3176;3177;3178;3179;3379;3380	368;456;460;1531;1689;3081;3175;3179;3379	75	85
sp|P62820|RAB1A_HUMAN	sp|P62820|RAB1A_HUMAN	6	6	3	>sp|P62820|RAB1A_HUMAN Ras-related protein Rab-1A OS=Homo sapiens OX=9606 GN=RAB1A PE=1 SV=3	1	6	6	3	6	6	3	42.9	42.9	20.5	22.677	205	205	0	76.62	42.9	32557000	32557000	32557000	10	10				161	298;388;471;899;1009;1115	True;True;True;True;True;True	308;401;487;928;1043;1154	361;461;578;1071;1197;1342	589;590;591;737;738;945;1696;1904;2164;2165	591;738;945;1696;1904;2165
sp|P62826|RAN_HUMAN	sp|P62826|RAN_HUMAN	5	5	5	>sp|P62826|RAN_HUMAN GTP-binding nuclear protein Ran OS=Homo sapiens OX=9606 GN=RAN PE=1 SV=3	1	5	5	5	5	5	5	19	19	19	24.423	216	216	0	31.492	19	21983000	21983000	21983000	4	4				162	437;640;1088;1196;1335	True;True;True;True;True	451;662;1126;1242;1392	517;770;1309;1442;1611	829;1233;2105;2324;2598	829;1233;2105;2324;2598
sp|P62879|GBB2_HUMAN	sp|P62879|GBB2_HUMAN	5	5	2	>sp|P62879|GBB2_HUMAN Guanine nucleotide-binding protein G(I)/G(S)/G(T) subunit beta-2 OS=Homo sapiens OX=9606 GN=GNB2 PE=1 SV=3	1	5	5	2	5	5	2	25.9	25.9	12.9	37.331	340	340	0	44.507	25.9	9915700	9915700	9915700	10	10				163	55;830;1312;1539;1770	True;True;True;True;True	56;859;1368;1604;1844	61;997;1587;1842;2191	100;101;102;1591;2559;2560;2561;2979;2980;3524	102;1591;2560;2980;3524
sp|P62937|PPIA_HUMAN;sp|Q9Y536|PAL4A_HUMAN;sp|P0DN26|PAL4F_HUMAN;sp|F5H284|PAL4D_HUMAN;sp|A0A0B4J2A2|PAL4C_HUMAN;sp|A0A075B767|PAL4H_HUMAN;sp|A0A075B759|PAL4E_HUMAN	sp|P62937|PPIA_HUMAN	7;1;1;1;1;1;1	7;1;1;1;1;1;1	7;1;1;1;1;1;1	>sp|P62937|PPIA_HUMAN Peptidyl-prolyl cis-trans isomerase A OS=Homo sapiens OX=9606 GN=PPIA PE=1 SV=2	7	7	7	7	7	7	7	55.8	55.8	55.8	18.012	165	165;164;164;164;164;164;164	0	48.808	55.8	28463000	28463000	28463000	13	13				164	662;732;855;1425;1723;1771;1772	True;True;True;True;True;True;True	685;755;884;1485;1797;1845;1846	796;877;1023;1708;2138;2192;2193	1263;1264;1403;1627;1628;1629;2746;2747;3445;3525;3526;3527;3528	1263;1403;1628;2746;3445;3526;3528
sp|P63173|RL38_HUMAN	sp|P63173|RL38_HUMAN	4	4	4	>sp|P63173|RL38_HUMAN 60S ribosomal protein L38 OS=Homo sapiens OX=9606 GN=RPL38 PE=1 SV=2	1	4	4	4	4	4	4	50	50	50	8.2178	70	70	0	48.599	50	35938000	35938000	35938000	13	13				165	696;851;1308;1878	True;True;True;True	719;880;1363;1953	835;836;1018;1019;1581;2312;2313	1335;1336;1337;1338;1617;1618;1619;1620;2549;2550;3719;3720;3721	1336;1618;2549;3719
sp|P67809|YBOX1_HUMAN;sp|Q9Y2T7|YBOX2_HUMAN;sp|P16989|YBOX3_HUMAN	sp|P67809|YBOX1_HUMAN	4;1;1	4;1;1	4;1;1	>sp|P67809|YBOX1_HUMAN Nuclease-sensitive element-binding protein 1 OS=Homo sapiens OX=9606 GN=YBX1 PE=1 SV=3	3	4	4	4	4	4	4	29.6	29.6	29.6	35.924	324	324;364;372	0	39.948	29.6	3557000	3557000	3557000	8	8				166	3;1241;1353;1494	True;True;True;True	3;1291;1410;1556	3;1501;1629;1786	4;2429;2430;2431;2624;2625;2626;2885	4;2429;2625;2885
sp|P68104|EF1A1_HUMAN;sp|Q5VTE0|EF1A3_HUMAN;sp|Q05639|EF1A2_HUMAN	sp|P68104|EF1A1_HUMAN;sp|Q5VTE0|EF1A3_HUMAN;sp|Q05639|EF1A2_HUMAN	13;12;8	13;12;8	13;12;8	>sp|P68104|EF1A1_HUMAN Elongation factor 1-alpha 1 OS=Homo sapiens OX=9606 GN=EEF1A1 PE=1 SV=1;>sp|Q5VTE0|EF1A3_HUMAN Putative elongation factor 1-alpha-like 3 OS=Homo sapiens OX=9606 GN=EEF1A1P5 PE=5 SV=1;>sp|Q05639|EF1A2_HUMAN Elongation factor 1-alpha 2	3	13	13	13	13	13	13	47.8	47.8	47.8	50.14	462	462;462;463	0	155.79	47.8	146610000	146610000	146610000	19	19				167	314;384;709;1038;1153;1199;1314;1398;1491;1555;1565;1684;1904	True;True;True;True;True;True;True;True;True;True;True;True;True	324;397;732;1075;1199;1245;1246;1370;1456;1457;1553;1620;1630;1756;1757;1979	378;455;850;1232;1390;1445;1446;1447;1589;1676;1677;1782;1859;1872;2092;2093;2340;2341	614;615;731;1361;1965;1966;1967;1968;2242;2243;2329;2330;2331;2332;2333;2334;2335;2336;2337;2338;2565;2692;2693;2694;2695;2696;2697;2698;2699;2700;2876;2877;2878;3007;3008;3034;3370;3371;3372;3373;3374;3760;3761	615;731;1361;1966;2242;2334;2565;2697;2877;3008;3034;3374;3760	76;77;78	102;276;410
sp|P68363|TBA1B_HUMAN;sp|Q71U36|TBA1A_HUMAN;sp|P68366|TBA4A_HUMAN;sp|Q9BQE3|TBA1C_HUMAN;sp|P0DPH8|TBA3D_HUMAN;sp|P0DPH7|TBA3C_HUMAN;sp|Q6PEY2|TBA3E_HUMAN;sp|Q9NY65|TBA8_HUMAN	sp|P68363|TBA1B_HUMAN;sp|Q71U36|TBA1A_HUMAN;sp|P68366|TBA4A_HUMAN;sp|Q9BQE3|TBA1C_HUMAN;sp|P0DPH8|TBA3D_HUMAN;sp|P0DPH7|TBA3C_HUMAN;sp|Q6PEY2|TBA3E_HUMAN	8;7;5;5;5;5;4;3	8;7;5;5;5;5;4;3	8;7;5;5;5;5;4;3	>sp|P68363|TBA1B_HUMAN Tubulin alpha-1B chain OS=Homo sapiens OX=9606 GN=TUBA1B PE=1 SV=1;>sp|Q71U36|TBA1A_HUMAN Tubulin alpha-1A chain OS=Homo sapiens OX=9606 GN=TUBA1A PE=1 SV=1;>sp|P68366|TBA4A_HUMAN Tubulin alpha-4A chain OS=Homo sapiens OX=9606 GN=TUB	8	8	8	8	8	8	8	30.4	30.4	30.4	50.151	451	451;451;448;449;450;450;450;449	0	71.584	30.4	24412000	24412000	24412000	15	15				168	133;136;143;322;1297;1422;1566;1700	True;True;True;True;True;True;True;True	135;138;145;332;1352;1482;1631;1774	155;156;159;160;168;386;1570;1705;1873;2115	265;266;269;270;281;282;625;2533;2534;2742;3035;3036;3412;3413;3414	266;269;281;625;2534;2742;3036;3414
sp|P68371|TBB4B_HUMAN;sp|P04350|TBB4A_HUMAN	sp|P68371|TBB4B_HUMAN;sp|P04350|TBB4A_HUMAN	11;8	11;8	2;1	>sp|P68371|TBB4B_HUMAN Tubulin beta-4B chain OS=Homo sapiens OX=9606 GN=TUBB4B PE=1 SV=1;>sp|P04350|TBB4A_HUMAN Tubulin beta-4A chain OS=Homo sapiens OX=9606 GN=TUBB4A PE=1 SV=2	2	11	11	2	11	11	2	34.6	34.6	6.5	49.83	445	445;444	0	86.453	34.6	17778000	17778000	17778000	17	17				169	84;326;373;532;760;765;796;1200;1226;1405;1877	True;True;True;True;True;True;True;True;True;True;True	86;337;386;551;787;793;825;1247;1276;1465;1952	98;392;444;649;914;921;958;1448;1486;1687;2311	163;633;634;635;713;714;1052;1053;1457;1468;1523;2339;2407;2408;2716;2717;3718	163;635;714;1052;1457;1468;1523;2339;2407;2717;3718
sp|Q00325|MPCP_HUMAN	sp|Q00325|MPCP_HUMAN	5	5	5	>sp|Q00325|MPCP_HUMAN Phosphate carrier protein, mitochondrial OS=Homo sapiens OX=9606 GN=SLC25A3 PE=1 SV=2	1	5	5	5	5	5	5	21	21	21	40.094	362	362	0	31.75	21	8009300	8009300	8009300	7	7				170	411;790;1041;1617;1754	True;True;True;True;True	425;819;1078;1682;1828	487;952;1235;1929;2172	776;1514;1515;1516;1971;3128;3494;3495	776;1514;1971;3128;3494
sp|Q00610|CLH1_HUMAN;sp|P53675|CLH2_HUMAN	sp|Q00610|CLH1_HUMAN	29;5	29;5	29;5	>sp|Q00610|CLH1_HUMAN Clathrin heavy chain 1 OS=Homo sapiens OX=9606 GN=CLTC PE=1 SV=5	2	29	29	29	29	29	29	27.8	27.8	27.8	191.61	1675	1675;1640	0	261.89	27.8	48560000	48560000	48560000	37	37				171	41;78;252;253;442;446;572;575;661;715;799;833;843;898;906;918;932;939;978;1024;1045;1112;1195;1328;1349;1586;1613;1719;1781	True;True;True;True;True;True;True;True;True;True;True;True;True;True;True;True;True;True;True;True;True;True;True;True;True;True;True;True;True	41;42;79;261;262;456;457;461;592;595;684;738;828;862;872;927;935;947;962;971;1011;1059;1082;1151;1241;1384;1406;1651;1678;1793;1855	45;46;86;309;310;522;523;527;692;695;795;856;962;1000;1010;1070;1078;1091;1107;1119;1163;1215;1239;1339;1441;1603;1625;1894;1925;2134;2202	72;73;74;75;76;141;512;513;837;838;839;840;845;1113;1117;1262;1370;1371;1529;1530;1595;1596;1608;1609;1695;1704;1728;1729;1748;1766;1850;1933;1978;2160;2161;2322;2323;2584;2616;3075;3122;3123;3124;3440;3441;3545	74;141;512;513;840;845;1113;1117;1262;1371;1529;1595;1609;1695;1704;1729;1748;1766;1850;1933;1978;2160;2322;2584;2616;3075;3122;3441;3545	79;80	32;996
sp|Q00839|HNRPU_HUMAN	sp|Q00839|HNRPU_HUMAN	6	6	6	>sp|Q00839|HNRPU_HUMAN Heterogeneous nuclear ribonucleoprotein U OS=Homo sapiens OX=9606 GN=HNRNPU PE=1 SV=6	1	6	6	6	6	6	6	13	13	13	90.583	825	825	0	106.08	13	14161000	14161000	14161000	11	11				172	605;1046;1056;1161;1163;1474	True;True;True;True;True;True	627;1083;1094;1207;1209;1535	731;1240;1252;1398;1400;1762	1178;1979;1980;1998;1999;2000;2254;2255;2256;2260;2842	1178;1979;1998;2256;2260;2842
sp|Q02413|DSG1_HUMAN	sp|Q02413|DSG1_HUMAN	8	8	8	>sp|Q02413|DSG1_HUMAN Desmoglein-1 OS=Homo sapiens OX=9606 GN=DSG1 PE=1 SV=2	1	8	8	8	8	8	8	11.8	11.8	11.8	113.75	1049	1049	0	83.614	11.8	10103000	10103000	10103000	10	10				173	345;719;802;1592;1648;1692;1882;1900	True;True;True;True;True;True;True;True	356;742;831;1657;1719;1765;1957;1975	411;860;861;965;1901;1972;2102;2317;2336	664;665;1379;1380;1381;1382;1536;1537;3083;3193;3387;3727;3755	665;1382;1537;3083;3193;3387;3727;3755	81;82	221;398
sp|Q02809|PLOD1_HUMAN	sp|Q02809|PLOD1_HUMAN	6	6	6	>sp|Q02809|PLOD1_HUMAN Procollagen-lysine,2-oxoglutarate 5-dioxygenase 1 OS=Homo sapiens OX=9606 GN=PLOD1 PE=1 SV=2	1	6	6	6	6	6	6	13.5	13.5	13.5	83.549	727	727	0	48.934	13.5	5855000	5855000	5855000	8	8				174	426;461;776;783;1077;1705	True;True;True;True;True;True	440;477;805;812;1115;1779	505;567;933;945;1297;2120	809;928;929;930;1489;1507;2085;3421	809;930;1489;1507;2085;3421
sp|Q02878|RL6_HUMAN	sp|Q02878|RL6_HUMAN	4	4	4	>sp|Q02878|RL6_HUMAN 60S ribosomal protein L6 OS=Homo sapiens OX=9606 GN=RPL6 PE=1 SV=3	1	4	4	4	4	4	4	19.8	19.8	19.8	32.728	288	288	0	25.832	19.8	9137500	9137500	9137500	4	4				175	120;652;1730;1903	True;True;True;True	122;674;1804;1978	141;782;783;2146;2339	245;1247;1248;3459;3759	245;1247;3459;3759
sp|Q06830|PRDX1_HUMAN;sp|P32119|PRDX2_HUMAN	sp|Q06830|PRDX1_HUMAN	4;1	4;1	4;1	>sp|Q06830|PRDX1_HUMAN Peroxiredoxin-1 OS=Homo sapiens OX=9606 GN=PRDX1 PE=1 SV=1	2	4	4	4	4	4	4	27.1	27.1	27.1	22.11	199	199;198	0	24.298	27.1	9022500	9022500	9022500	5	5				176	126;621;1091;1289	True;True;True;True	128;643;1129;1344	147;749;1312;1562	252;1203;1204;2109;2523;2524	252;1204;2109;2524
sp|Q07021|C1QBP_HUMAN	sp|Q07021|C1QBP_HUMAN	7	7	7	>sp|Q07021|C1QBP_HUMAN Complement component 1 Q subcomponent-binding protein, mitochondrial OS=Homo sapiens OX=9606 GN=C1QBP PE=1 SV=1	1	7	7	7	7	7	7	48.6	48.6	48.6	31.362	282	282	0	105.24	48.6	21583000	21583000	21583000	18	18				177	85;257;382;597;1129;1681;1682	True;True;True;True;True;True;True	87;266;395;618;1171;1753;1754	99;315;453;721;1361;2089;2090	164;165;166;167;168;169;522;523;727;728;1164;1165;1166;2191;2192;3364;3365;3366	166;523;728;1164;2191;3365;3366
sp|Q07065|CKAP4_HUMAN	sp|Q07065|CKAP4_HUMAN	5	5	5	>sp|Q07065|CKAP4_HUMAN Cytoskeleton-associated protein 4 OS=Homo sapiens OX=9606 GN=CKAP4 PE=1 SV=2	1	5	5	5	5	5	5	12.3	12.3	12.3	66.022	602	602	0	31.824	12.3	6651600	6651600	6651600	7	7				178	125;699;937;1305;1437	True;True;True;True;True	127;722;969;1360;1497	146;839;1117;1578;1723	251;1343;1344;1762;1763;2545;2775	251;1344;1762;2545;2775
sp|Q07955|SRSF1_HUMAN	sp|Q07955|SRSF1_HUMAN	6	6	6	>sp|Q07955|SRSF1_HUMAN Serine/arginine-rich splicing factor 1 OS=Homo sapiens OX=9606 GN=SRSF1 PE=1 SV=2	1	6	6	6	6	6	6	25.8	25.8	25.8	27.744	248	248	0	36.544	25.8	4932300	4932300	4932300	8	8				179	202;276;529;840;1412;1573	True;True;True;True;True;True	208;286;548;869;1472;1638	241;337;646;1007;1695;1880	396;397;558;1049;1605;2728;2729;3050	397;558;1049;1605;2728;3050
sp|Q08211|DHX9_HUMAN	sp|Q08211|DHX9_HUMAN	6	6	6	>sp|Q08211|DHX9_HUMAN ATP-dependent RNA helicase A OS=Homo sapiens OX=9606 GN=DHX9 PE=1 SV=4	1	6	6	6	6	6	6	6	6	6	140.96	1270	1270	0	45.678	6	4047500	4047500	4047500	6	6				180	192;265;333;540;557;1480	True;True;True;True;True;True	197;274;344;559;576;577;1542	229;324;399;657;675;676;1770	379;539;646;1063;1087;1088;2855;2856	379;539;646;1063;1088;2856	83	1059
sp|Q08554|DSC1_HUMAN	sp|Q08554|DSC1_HUMAN	6	6	6	>sp|Q08554|DSC1_HUMAN Desmocollin-1 OS=Homo sapiens OX=9606 GN=DSC1 PE=1 SV=2	1	6	6	6	6	6	6	9.3	9.3	9.3	99.986	894	894	0	38.484	9.3	5935200	5935200	5935200	6	6				181	9;254;620;695;753;1765	True;True;True;True;True;True	9;263;642;718;778;1839	9;311;748;834;905;2186	12;514;1202;1333;1334;1444;3514	12;514;1202;1333;1444;3514	84	453
sp|Q12931|TRAP1_HUMAN	sp|Q12931|TRAP1_HUMAN	8	8	8	>sp|Q12931|TRAP1_HUMAN Heat shock protein 75 kDa, mitochondrial OS=Homo sapiens OX=9606 GN=TRAP1 PE=1 SV=3	1	8	8	8	8	8	8	15.1	15.1	15.1	80.109	704	704	0	87.33	15.1	14863000	14863000	14863000	11	11				182	339;340;402;629;1094;1457;1458;1844	True;True;True;True;True;True;True;True	350;351;415;416;651;1132;1518;1519;1919	405;406;476;477;759;1319;1745;1746;2277	655;656;657;763;764;1218;1219;2122;2817;2818;2819;3671;3672	656;657;764;1219;2122;2817;2818;3672	85	448
sp|Q13148|TADBP_HUMAN	sp|Q13148|TADBP_HUMAN	4	4	4	>sp|Q13148|TADBP_HUMAN TAR DNA-binding protein 43 OS=Homo sapiens OX=9606 GN=TARDBP PE=1 SV=1	1	4	4	4	4	4	4	11.4	11.4	11.4	44.739	414	414	0	29.817	11.4	1618000	1618000	1618000	4	4				183	413;453;867;1309	True;True;True;True	427;469;896;1364	489;559;1036;1582	780;919;1647;2551	780;919;1647;2551
sp|Q13162|PRDX4_HUMAN	sp|Q13162|PRDX4_HUMAN	7	7	7	>sp|Q13162|PRDX4_HUMAN Peroxiredoxin-4 OS=Homo sapiens OX=9606 GN=PRDX4 PE=1 SV=1	1	7	7	7	7	7	7	47.2	47.2	47.2	30.54	271	271	0	51.141	47.2	12344000	12344000	12344000	13	13				184	268;622;770;803;1092;1421;1610	True;True;True;True;True;True;True	277;644;798;832;1130;1481;1675	327;750;926;966;1313;1704;1922	543;544;1205;1206;1207;1474;1475;1538;2110;2111;2741;3118;3119	544;1206;1474;1538;2111;2741;3119
sp|Q13838|DX39B_HUMAN	sp|Q13838|DX39B_HUMAN	7	7	3	>sp|Q13838|DX39B_HUMAN Spliceosome RNA helicase DDX39B OS=Homo sapiens OX=9606 GN=DDX39B PE=1 SV=1	1	7	7	3	7	7	3	24.8	24.8	9.8	48.991	428	428	0	43.794	24.8	16261000	16261000	16261000	9	9				185	67;190;588;755;1150;1665;1758	True;True;True;True;True;True;True	68;195;608;780;1196;1736;1832	73;227;709;907;1387;2066;2176	117;118;377;1141;1447;1448;2239;3326;3501	118;377;1141;1448;2239;3326;3501
sp|Q14103|HNRPD_HUMAN	sp|Q14103|HNRPD_HUMAN	5	5	5	>sp|Q14103|HNRPD_HUMAN Heterogeneous nuclear ribonucleoprotein D0 OS=Homo sapiens OX=9606 GN=HNRNPD PE=1 SV=1	1	5	5	5	5	5	5	15.8	15.8	15.8	38.434	355	355	0	32.92	15.8	9845000	9845000	8217400	8	8				186	216;386;409;410;1113	True;True;True;True;True	222;399;423;424;1152	256;457;484;485;486;1340	419;733;771;772;773;774;775;2162	419;733;771;775;2162
sp|Q14697|GANAB_HUMAN	sp|Q14697|GANAB_HUMAN	19	19	19	>sp|Q14697|GANAB_HUMAN Neutral alpha-glucosidase AB OS=Homo sapiens OX=9606 GN=GANAB PE=1 SV=3	1	19	19	19	19	19	19	33.6	33.6	33.6	106.87	944	944	0	158.99	33.6	53052000	53052000	53052000	33	33				187	38;186;214;261;406;448;1105;1123;1208;1319;1329;1443;1516;1517;1559;1780;1783;1828;1886	True;True;True;True;True;True;True;True;True;True;True;True;True;True;True;True;True;True;True	38;191;220;270;420;464;1143;1163;1164;1257;1375;1385;1503;1581;1582;1624;1854;1857;1902;1961	42;222;253;254;319;320;481;530;1331;1351;1352;1466;1467;1594;1604;1729;1815;1816;1866;2201;2205;2256;2322	68;372;414;415;416;417;529;530;768;848;849;2145;2176;2177;2372;2373;2571;2572;2585;2789;2930;2931;2932;3019;3020;3021;3543;3544;3548;3549;3550;3633;3634;3733;3734	68;372;416;529;768;849;2145;2177;2372;2571;2585;2789;2930;2931;3019;3543;3549;3634;3733	86;87	338;339
sp|Q14974|IMB1_HUMAN	sp|Q14974|IMB1_HUMAN	4	4	4	>sp|Q14974|IMB1_HUMAN Importin subunit beta-1 OS=Homo sapiens OX=9606 GN=KPNB1 PE=1 SV=2	1	4	4	4	4	4	4	6.7	6.7	6.7	97.169	876	876	0	57.136	6.7	6214800	6214800	6214800	6	6				188	474;487;903;1729	True;True;True;True	490;503;932;1803	581;594;1075;2145	948;966;1700;1701;3457;3458	948;966;1700;3457
sp|Q15084|PDIA6_HUMAN	sp|Q15084|PDIA6_HUMAN	10	10	10	>sp|Q15084|PDIA6_HUMAN Protein disulfide-isomerase A6 OS=Homo sapiens OX=9606 GN=PDIA6 PE=1 SV=1	1	10	10	10	10	10	10	32.5	32.5	32.5	48.121	440	440	0	120.99	32.5	57637000	57637000	57637000	27	27				189	10;76;77;582;585;702;904;1229;1544;1691	True;True;True;True;True;True;True;True;True;True	10;77;78;602;605;725;933;1279;1609;1764	10;84;85;702;705;842;843;1076;1489;1848;2100;2101	13;133;134;135;136;137;138;139;140;1127;1128;1132;1133;1348;1349;1350;1351;1352;1353;1702;2411;2412;2989;2990;3384;3385;3386	13;135;139;1128;1133;1353;1702;2411;2990;3385
sp|Q15165|PON2_HUMAN	sp|Q15165|PON2_HUMAN	4	4	4	>sp|Q15165|PON2_HUMAN Serum paraoxonase/arylesterase 2 OS=Homo sapiens OX=9606 GN=PON2 PE=1 SV=4	1	4	4	4	4	4	4	23.2	23.2	23.2	39.38	354	354	0	27.239	23.2	5563300	5563300	5563300	6	6				190	376;500;956;1235	True;True;True;True	389;516;989;1285	447;607;1139;1495	718;986;1799;1800;2420;2421	718;986;1799;2420
sp|Q15233|NONO_HUMAN	sp|Q15233|NONO_HUMAN	5	5	5	>sp|Q15233|NONO_HUMAN Non-POU domain-containing octamer-binding protein OS=Homo sapiens OX=9606 GN=NONO PE=1 SV=4	1	5	5	5	5	5	5	13.8	13.8	13.8	54.231	471	471	0	37.435	13.8	4563400	4563400	4563400	7	7				191	48;394;543;1194;1354	True;True;True;True;True	49;407;562;1240;1411	54;467;660;1439;1440;1630	89;750;1066;2319;2320;2321;2627	89;750;1066;2320;2627
sp|Q15293|RCN1_HUMAN	sp|Q15293|RCN1_HUMAN	5	5	5	>sp|Q15293|RCN1_HUMAN Reticulocalbin-1 OS=Homo sapiens OX=9606 GN=RCN1 PE=1 SV=1	1	5	5	5	5	5	5	16.6	16.6	16.6	38.89	331	331	0	30.122	16.6	4545600	4545600	4545600	4	4				192	642;643;670;691;1535	True;True;True;True;True	664;665;693;714;1600	772;773;805;830;1837	1237;1238;1276;1326;2972	1237;1238;1276;1326;2972
sp|Q15393|SF3B3_HUMAN	sp|Q15393|SF3B3_HUMAN	5	5	5	>sp|Q15393|SF3B3_HUMAN Splicing factor 3B subunit 3 OS=Homo sapiens OX=9606 GN=SF3B3 PE=1 SV=4	1	5	5	5	5	5	5	8.9	8.9	8.9	135.58	1217	1217	0	34.08	8.9	5543200	5543200	5543200	5	5				193	331;624;844;958;1039	True;True;True;True;True	342;646;873;991;1076	397;753;1011;1141;1233	642;1211;1610;1805;1969	642;1211;1610;1805;1969
sp|Q15436|SC23A_HUMAN	sp|Q15436|SC23A_HUMAN	6	6	6	>sp|Q15436|SC23A_HUMAN Protein transport protein Sec23A OS=Homo sapiens OX=9606 GN=SEC23A PE=1 SV=2	1	6	6	6	6	6	6	12.5	12.5	12.5	86.16	765	765	0	38.012	12.5	4068200	4068200	4068200	11	11				194	566;636;797;1140;1240;1864	True;True;True;True;True;True	586;658;826;1186;1290;1939	685;766;959;1376;1500;2298	1102;1103;1104;1226;1524;2221;2222;2223;2427;2428;3703	1102;1226;1524;2222;2428;3703
sp|Q15785|TOM34_HUMAN	sp|Q15785|TOM34_HUMAN	10	10	10	>sp|Q15785|TOM34_HUMAN Mitochondrial import receptor subunit TOM34 OS=Homo sapiens OX=9606 GN=TOMM34 PE=1 SV=2	1	10	10	10	10	10	10	40.1	40.1	40.1	34.559	309	309	0	147.22	40.1	29468000	29468000	29468000	15	15				195	75;438;1165;1221;1473;1631;1740;1741;1747;1885	True;True;True;True;True;True;True;True;True;True	76;452;1211;1271;1534;1698;1814;1815;1821;1960	83;518;1402;1481;1761;1949;2157;2158;2164;2321	132;830;831;2263;2399;2400;2841;3156;3157;3471;3472;3482;3483;3484;3732	132;831;2263;2400;2841;3157;3471;3472;3484;3732
sp|Q3ZCQ8|TIM50_HUMAN	sp|Q3ZCQ8|TIM50_HUMAN	4	4	4	>sp|Q3ZCQ8|TIM50_HUMAN Mitochondrial import inner membrane translocase subunit TIM50 OS=Homo sapiens OX=9606 GN=TIMM50 PE=1 SV=2	1	4	4	4	4	4	4	17.6	17.6	17.6	39.646	353	353	0	31.572	17.6	2823900	2823900	2823900	4	4				196	110;767;1325;1628	True;True;True;True	112;795;1381;1694	130;923;1600;1944	223;224;1470;2581;3149	223;1470;2581;3149
sp|Q5T5P2|SKT_HUMAN	sp|Q5T5P2|SKT_HUMAN	4	4	4	>sp|Q5T5P2|SKT_HUMAN Sickle tail protein homolog OS=Homo sapiens OX=9606 GN=KIAA1217 PE=1 SV=2	1	4	4	4	4	4	4	2.6	2.6	2.6	214.11	1943	1943	0	22.621	2.6	5114300	5114300	5114300	6	6				197	444;530;766;882	True;True;True;True	459;549;794;911	525;647;922;1053	842;843;1050;1469;1674;1675	843;1050;1469;1675
sp|Q5T749|KPRP_HUMAN	sp|Q5T749|KPRP_HUMAN	5	5	5	>sp|Q5T749|KPRP_HUMAN Keratinocyte proline-rich protein OS=Homo sapiens OX=9606 GN=KPRP PE=1 SV=1	1	5	5	5	5	5	5	10.5	10.5	10.5	64.135	579	579	0	29.921	10.5	5413600	5413600	5413600	5	5				198	1054;1345;1348;1357;1612	True;True;True;True;True	1092;1402;1405;1414;1677	1249;1621;1624;1633;1924	1993;2612;2615;2630;3121	1993;2612;2615;2630;3121
sp|Q6P1L8|RM14_HUMAN	sp|Q6P1L8|RM14_HUMAN	4	4	4	>sp|Q6P1L8|RM14_HUMAN 39S ribosomal protein L14, mitochondrial OS=Homo sapiens OX=9606 GN=MRPL14 PE=1 SV=1	1	4	4	4	4	4	4	35.9	35.9	35.9	15.947	145	145	0	123.87	35.9	16021000	16021000	16021000	6	6				199	398;1693;1726;1798	True;True;True;True	411;1766;1800;1872	471;2103;2142;2222;2223	755;3388;3452;3453;3580;3581	755;3388;3452;3581
sp|Q6P4R8|NFRKB_HUMAN	sp|Q6P4R8|NFRKB_HUMAN	6	6	6	>sp|Q6P4R8|NFRKB_HUMAN Nuclear factor related to kappa-B-binding protein OS=Homo sapiens OX=9606 GN=NFRKB PE=1 SV=2	1	6	6	6	6	6	6	8.8	8.8	8.8	139	1299	1299	0	55.18	8.8	8697000	8697000	8697000	10	10				200	54;124;539;791;979;1074	True;True;True;True;True;True	55;126;558;820;1012;1112	60;145;656;953;1164;1294	99;249;250;1062;1517;1518;1851;1852;1853;2078	99;250;1062;1517;1851;2078
sp|Q6VMQ6|MCAF1_HUMAN	sp|Q6VMQ6|MCAF1_HUMAN	4	4	4	>sp|Q6VMQ6|MCAF1_HUMAN Activating transcription factor 7-interacting protein 1 OS=Homo sapiens OX=9606 GN=ATF7IP PE=1 SV=3	1	4	4	4	4	4	4	5.7	5.7	5.7	136.39	1270	1270	0	27.194	5.7	3320400	3320400	3320400	4	4				201	865;1213;1616;1721	True;True;True;True	894;1262;1681;1795	1034;1472;1928;2136	1645;2378;3127;3443	1645;2378;3127;3443
sp|Q6YN16|HSDL2_HUMAN	sp|Q6YN16|HSDL2_HUMAN	5	5	5	>sp|Q6YN16|HSDL2_HUMAN Hydroxysteroid dehydrogenase-like protein 2 OS=Homo sapiens OX=9606 GN=HSDL2 PE=1 SV=1	1	5	5	5	5	5	5	16.7	16.7	16.7	45.394	418	418	0	37.374	16.7	7210800	7210800	7210800	8	8				202	188;894;896;1004;1397	True;True;True;True;True	193;923;925;1038;1455	224;225;1066;1068;1191;1675	374;375;1690;1691;1693;1894;1895;1896;2691	375;1691;1693;1894;2691
sp|Q7KZF4|SND1_HUMAN	sp|Q7KZF4|SND1_HUMAN	4	4	4	>sp|Q7KZF4|SND1_HUMAN Staphylococcal nuclease domain-containing protein 1 OS=Homo sapiens OX=9606 GN=SND1 PE=1 SV=1	1	4	4	4	4	4	4	7.3	7.3	7.3	102	910	910	0	27.784	7.3	1575200	1575200	1575200	6	6				203	79;272;362;1847	True;True;True;True	80;282;374;1922	87;333;429;430;2280	142;143;553;554;694;695;3675	143;554;694;3675
sp|Q86V81|THOC4_HUMAN	sp|Q86V81|THOC4_HUMAN	4	4	4	>sp|Q86V81|THOC4_HUMAN THO complex subunit 4 OS=Homo sapiens OX=9606 GN=ALYREF PE=1 SV=3	1	4	4	4	4	4	4	27.2	27.2	27.2	26.888	257	257	0	72.575	27.2	6742900	6742900	6742900	7	7				204	1020;1021;1303;1321	True;True;True;True	1055;1056;1358;1377	1210;1211;1576;1596	1923;1924;1925;2543;2574;2575;2576	1923;1925;2543;2575
sp|Q8NBJ5|GT251_HUMAN	sp|Q8NBJ5|GT251_HUMAN	5	5	5	>sp|Q8NBJ5|GT251_HUMAN Procollagen galactosyltransferase 1 OS=Homo sapiens OX=9606 GN=COLGALT1 PE=1 SV=1	1	5	5	5	5	5	5	12.1	12.1	12.1	71.635	622	622	0	33.809	12.1	5240000	5240000	5240000	7	7				205	82;648;1188;1599;1642	True;True;True;True;True	84;670;1234;1664;1712	96;778;1432;1910;1965	161;1243;2309;2310;3102;3103;3182	161;1243;2309;3103;3182
sp|Q8NBS9|TXND5_HUMAN	sp|Q8NBS9|TXND5_HUMAN	4	4	4	>sp|Q8NBS9|TXND5_HUMAN Thioredoxin domain-containing protein 5 OS=Homo sapiens OX=9606 GN=TXNDC5 PE=1 SV=2	1	4	4	4	4	4	4	11.8	11.8	11.8	47.628	432	432	0	28.33	11.8	6283000	6283000	6283000	9	9				206	611;678;1670;1672	True;True;True;True	633;701;1741;1743	737;813;2071;2072;2074	1186;1286;1287;3335;3336;3337;3338;3341;3342	1186;1287;3335;3342
sp|Q92945|FUBP2_HUMAN	sp|Q92945|FUBP2_HUMAN	6	6	6	>sp|Q92945|FUBP2_HUMAN Far upstream element-binding protein 2 OS=Homo sapiens OX=9606 GN=KHSRP PE=1 SV=4	1	6	6	6	6	6	6	13.1	13.1	13.1	73.114	711	711	0	54.057	13.1	4768500	4768500	4768500	6	6				207	521;708;713;727;1293;1500	True;True;True;True;True;True	538;731;736;750;1348;1562	631;849;854;871;1566;1792	1024;1360;1367;1395;2528;2891	1024;1360;1367;1395;2528;2891
sp|Q96AE4|FUBP1_HUMAN	sp|Q96AE4|FUBP1_HUMAN	4	4	4	>sp|Q96AE4|FUBP1_HUMAN Far upstream element-binding protein 1 OS=Homo sapiens OX=9606 GN=FUBP1 PE=1 SV=3	1	4	4	4	4	4	4	8.5	8.5	8.5	67.56	644	644	0	30.49	8.5	1620000	1620000	1620000	4	4				208	591;681;707;1372	True;True;True;True	612;704;730;1430	713;817;848;1649	1151;1294;1359;2652	1151;1294;1359;2652
sp|Q96AG4|LRC59_HUMAN	sp|Q96AG4|LRC59_HUMAN	4	4	4	>sp|Q96AG4|LRC59_HUMAN Leucine-rich repeat-containing protein 59 OS=Homo sapiens OX=9606 GN=LRRC59 PE=1 SV=1	1	4	4	4	4	4	4	17.3	17.3	17.3	34.93	307	307	0	27.599	17.3	13279000	13279000	13279000	6	6				209	128;1075;1097;1823	True;True;True;True	130;1113;1135;1897	149;1295;1322;2251	254;2079;2080;2125;2126;3624	254;2079;2125;3624
sp|Q96IR7|HPDL_HUMAN	sp|Q96IR7|HPDL_HUMAN	7	7	7	>sp|Q96IR7|HPDL_HUMAN 4-hydroxyphenylpyruvate dioxygenase-like protein OS=Homo sapiens OX=9606 GN=HPDL PE=1 SV=1	1	7	7	7	7	7	7	25.3	25.3	25.3	39.385	371	371	0	65.346	25.3	6913400	6913400	6913400	10	10				210	86;428;943;1253;1275;1399;1436	True;True;True;True;True;True;True	88;442;975;1303;1328;1458;1496	100;507;1123;1515;1544;1678;1722	170;171;814;1773;1774;2451;2498;2701;2702;2774	171;814;1774;2451;2498;2701;2774
sp|Q96ST3|SIN3A_HUMAN	sp|Q96ST3|SIN3A_HUMAN	4	4	4	>sp|Q96ST3|SIN3A_HUMAN Paired amphipathic helix protein Sin3a OS=Homo sapiens OX=9606 GN=SIN3A PE=1 SV=2	1	4	4	4	4	4	4	3.4	3.4	3.4	145.17	1273	1273	0	25.036	3.4	2461500	2461500	2461500	4	4				211	211;891;1002;1470	True;True;True;True	217;920;1036;1531	250;1063;1189;1758	409;1687;1889;1890;2838	409;1687;1890;2838
sp|Q99623|PHB2_HUMAN	sp|Q99623|PHB2_HUMAN	6	6	6	>sp|Q99623|PHB2_HUMAN Prohibitin-2 OS=Homo sapiens OX=9606 GN=PHB2 PE=1 SV=2	1	6	6	6	6	6	6	20.7	20.7	20.7	33.296	299	299	0	37.971	20.7	15103000	15103000	15103000	6	6				212	434;710;825;972;1008;1290	True;True;True;True;True;True	448;733;854;1005;1042;1345	514;851;992;1157;1196;1563	824;1362;1582;1836;1837;1903;2525	824;1362;1582;1837;1903;2525
sp|Q99714|HCD2_HUMAN	sp|Q99714|HCD2_HUMAN	6	6	6	>sp|Q99714|HCD2_HUMAN 3-hydroxyacyl-CoA dehydrogenase type-2 OS=Homo sapiens OX=9606 GN=HSD17B10 PE=1 SV=3	1	6	6	6	6	6	6	43.7	43.7	43.7	26.923	261	261	0	75.841	43.7	18882000	18882000	18882000	19	19				213	553;959;1078;1082;1666;1732	True;True;True;True;True;True	572;992;1116;1120;1737;1806	671;1142;1143;1298;1302;1303;2067;2148	1081;1082;1806;1807;1808;1809;1810;1811;1812;1813;2086;2087;2088;2095;2096;2097;3327;3328;3461	1081;1809;2088;2095;3328;3461
sp|Q9GZT3|SLIRP_HUMAN	sp|Q9GZT3|SLIRP_HUMAN	7	7	7	>sp|Q9GZT3|SLIRP_HUMAN SRA stem-loop-interacting RNA-binding protein, mitochondrial OS=Homo sapiens OX=9606 GN=SLIRP PE=1 SV=1	1	7	7	7	7	7	7	78	78	78	12.349	109	109	0	56.586	78	12456000	12456000	12456000	7	7				214	158;315;550;1040;1147;1337;1420	True;True;True;True;True;True;True	160;325;569;1077;1193;1394;1480	186;379;668;1234;1383;1384;1613;1703	312;616;1077;1078;1970;2234;2235;2600;2740	312;616;1077;1970;2235;2600;2740
sp|Q9H2P0|ADNP_HUMAN	sp|Q9H2P0|ADNP_HUMAN	8	8	8	>sp|Q9H2P0|ADNP_HUMAN Activity-dependent neuroprotector homeobox protein OS=Homo sapiens OX=9606 GN=ADNP PE=1 SV=1	1	8	8	8	8	8	8	10.6	10.6	10.6	123.56	1102	1102	0	64.834	10.6	14132000	14132000	14132000	15	15				215	655;686;973;1447;1463;1496;1501;1887	True;True;True;True;True;True;True;True	678;709;1006;1507;1524;1558;1563;1962	788;825;1158;1734;1751;1788;1793;2323	1254;1312;1838;1839;1840;1841;1842;2798;2799;2827;2887;2892;3735;3736;3737	1254;1312;1840;2798;2827;2887;2892;3737
sp|Q9HCC0|MCCB_HUMAN	sp|Q9HCC0|MCCB_HUMAN	7	7	7	>sp|Q9HCC0|MCCB_HUMAN Methylcrotonoyl-CoA carboxylase beta chain, mitochondrial OS=Homo sapiens OX=9606 GN=MCCC2 PE=1 SV=1	1	7	7	7	7	7	7	17.8	17.8	17.8	61.332	563	563	0	44.594	17.8	5881200	5881200	5881200	10	10				216	433;516;808;1174;1408;1541;1775	True;True;True;True;True;True;True	447;533;837;1220;1468;1606;1849	513;625;972;1411;1412;1691;1845;2196	823;1014;1551;2273;2274;2275;2722;2985;3531;3532	823;1014;1551;2273;2722;2985;3531
sp|Q9HDC9|APMAP_HUMAN	sp|Q9HDC9|APMAP_HUMAN	9	9	9	>sp|Q9HDC9|APMAP_HUMAN Adipocyte plasma membrane-associated protein OS=Homo sapiens OX=9606 GN=APMAP PE=1 SV=2	1	9	9	9	9	9	9	28.8	28.8	28.8	46.48	416	416	0	57.255	28.8	22814000	22814000	22814000	12	12				217	440;547;953;1001;1011;1127;1351;1609;1800	True;True;True;True;True;True;True;True;True	454;566;986;1035;1045;1168;1408;1674;1874	520;665;1135;1188;1199;1356;1627;1921;2225	833;834;835;1073;1793;1794;1888;1907;2182;2621;2622;3117;3584	834;1073;1794;1888;1907;2182;2622;3117;3584
sp|Q9NQC3|RTN4_HUMAN	sp|Q9NQC3|RTN4_HUMAN	7	7	7	>sp|Q9NQC3|RTN4_HUMAN Reticulon-4 OS=Homo sapiens OX=9606 GN=RTN4 PE=1 SV=2	1	7	7	7	7	7	7	11.1	11.1	11.1	129.93	1192	1192	0	74.911	11.1	23375000	23375000	23375000	9	9				218	144;563;651;872;1377;1881;1890	True;True;True;True;True;True;True	146;583;673;901;1435;1956;1965	169;682;781;1041;1655;2316;2326	283;1098;1246;1653;2661;3725;3726;3742;3743	283;1098;1246;1653;2661;3726;3742
sp|Q9NSE4|SYIM_HUMAN	sp|Q9NSE4|SYIM_HUMAN	8	8	8	>sp|Q9NSE4|SYIM_HUMAN Isoleucine--tRNA ligase, mitochondrial OS=Homo sapiens OX=9606 GN=IARS2 PE=1 SV=2	1	8	8	8	8	8	8	13.9	13.9	13.9	113.79	1012	1012	0	62.673	13.9	13521000	13521000	13521000	16	16				219	282;419;717;1375;1509;1572;1662;1895	True;True;True;True;True;True;True;True	292;433;740;1433;1572;1637;1733;1970	344;495;858;1652;1653;1802;1879;1986;1987;2331	567;568;787;1376;2655;2656;2657;2658;2659;2907;3048;3049;3217;3218;3749;3750	567;787;1376;2658;2907;3048;3217;3750
sp|Q9NYU2|UGGG1_HUMAN	sp|Q9NYU2|UGGG1_HUMAN	6	6	6	>sp|Q9NYU2|UGGG1_HUMAN UDP-glucose:glycoprotein glucosyltransferase 1 OS=Homo sapiens OX=9606 GN=UGGT1 PE=1 SV=3	1	6	6	6	6	6	6	7.9	7.9	7.9	177.19	1555	1555	0	42.188	7.9	4354800	4354800	4354800	12	12				220	303;423;724;747;1808;1818	True;True;True;True;True;True	313;437;747;772;1882;1892	366;499;868;899;2234;2245;2246	596;597;791;792;1391;1438;3593;3614;3615;3616;3617;3618	597;791;1391;1438;3593;3617
sp|Q9NZI8|IF2B1_HUMAN	sp|Q9NZI8|IF2B1_HUMAN	5	5	5	>sp|Q9NZI8|IF2B1_HUMAN Insulin-like growth factor 2 mRNA-binding protein 1 OS=Homo sapiens OX=9606 GN=IGF2BP1 PE=1 SV=2	1	5	5	5	5	5	5	13.2	13.2	13.2	63.48	577	577	0	41.28	13.2	12082000	12082000	12082000	11	11				221	240;723;811;1104;1632	True;True;True;True;True	248;746;840;1142;1699	295;866;867;975;1330;1950	489;490;491;1388;1389;1390;1555;2143;2144;3158;3159	490;1389;1555;2144;3159
sp|Q9P0U4|CXXC1_HUMAN	sp|Q9P0U4|CXXC1_HUMAN	5	5	5	>sp|Q9P0U4|CXXC1_HUMAN CXXC-type zinc finger protein 1 OS=Homo sapiens OX=9606 GN=CXXC1 PE=1 SV=2	1	5	5	5	5	5	5	8.5	8.5	8.5	75.711	656	656	0	31.592	8.5	7145900	7145900	7145900	8	8				222	792;879;928;1323;1350	True;True;True;True;True	821;908;957;1379;1407	954;1050;1102;1598;1626	1519;1669;1743;2578;2579;2617;2618;2619;2620	1519;1669;1743;2579;2619
sp|Q9P2E9|RRBP1_HUMAN;sp|Q8N4C6|NIN_HUMAN	sp|Q9P2E9|RRBP1_HUMAN	23;1	23;1	23;1	>sp|Q9P2E9|RRBP1_HUMAN Ribosome-binding protein 1 OS=Homo sapiens OX=9606 GN=RRBP1 PE=1 SV=5	2	23	23	23	23	23	23	33.1	33.1	33.1	152.45	1410	1410;2090	0	214.48	33.1	55151000	55151000	55151000	30	30				223	29;33;51;106;178;273;318;368;379;559;633;649;834;991;996;1049;1232;1298;1306;1415;1584;1589;1683	True;True;True;True;True;True;True;True;True;True;True;True;True;True;True;True;True;True;True;True;True;True;True	29;33;52;108;183;283;328;381;392;579;655;671;863;1024;1029;1087;1282;1353;1361;1475;1649;1654;1755	32;36;57;123;124;214;334;382;437;450;678;763;779;1001;1177;1182;1244;1492;1571;1579;1698;1892;1898;2091	55;59;95;208;209;360;361;362;555;621;704;722;723;724;1092;1223;1244;1597;1875;1881;1986;2416;2535;2546;2732;2733;3073;3080;3367;3368;3369	55;59;95;209;361;555;621;704;723;1092;1223;1244;1597;1875;1881;1986;2416;2535;2546;2733;3073;3080;3368
sp|Q9P2R7|SUCB1_HUMAN	sp|Q9P2R7|SUCB1_HUMAN	5	5	5	>sp|Q9P2R7|SUCB1_HUMAN Succinate--CoA ligase [ADP-forming] subunit beta, mitochondrial OS=Homo sapiens OX=9606 GN=SUCLA2 PE=1 SV=3	1	5	5	5	5	5	5	15.6	15.6	15.6	50.317	463	463	0	49.972	15.6	2928300	2928300	2928300	9	9				224	92;684;742;764;1460	True;True;True;True;True	94;707;767;792;1521	107;822;893;920;1748	181;182;183;1305;1430;1431;1432;1467;2822	182;1305;1430;1467;2822
sp|Q9UBL3|ASH2L_HUMAN	sp|Q9UBL3|ASH2L_HUMAN	4	4	4	>sp|Q9UBL3|ASH2L_HUMAN Set1/Ash2 histone methyltransferase complex subunit ASH2 OS=Homo sapiens OX=9606 GN=ASH2L PE=1 SV=1	1	4	4	4	4	4	4	10.5	10.5	10.5	68.722	628	628	0	30.837	10.5	5071900	5071900	5071900	4	4				225	414;672;794;1379	True;True;True;True	428;695;823;1437	490;807;956;1657	781;1278;1521;2663	781;1278;1521;2663
sp|Q9UHG3|PCYOX_HUMAN	sp|Q9UHG3|PCYOX_HUMAN	10	10	10	>sp|Q9UHG3|PCYOX_HUMAN Prenylcysteine oxidase 1 OS=Homo sapiens OX=9606 GN=PCYOX1 PE=1 SV=3	1	10	10	10	10	10	10	31.9	31.9	31.9	56.639	505	505	0	75.4	31.9	20787000	20787000	20787000	14	14				226	166;329;679;703;923;1079;1107;1142;1378;1884	True;True;True;True;True;True;True;True;True;True	170;340;702;726;952;1117;1145;1188;1436;1959	201;395;814;844;1096;1299;1333;1378;1656;2319;2320	342;639;640;1288;1289;1354;1355;1734;2089;2147;2148;2225;2662;3730;3731	342;639;1288;1355;1734;2089;2148;2225;2662;3731	88	292
sp|Q9UJZ1|STML2_HUMAN	sp|Q9UJZ1|STML2_HUMAN	4	4	4	>sp|Q9UJZ1|STML2_HUMAN Stomatin-like protein 2, mitochondrial OS=Homo sapiens OX=9606 GN=STOML2 PE=1 SV=1	1	4	4	4	4	4	4	22.5	22.5	22.5	38.534	356	356	0	26.754	22.5	4871800	4871800	4871800	6	6				227	34;101;247;1236	True;True;True;True	34;103;255;1286	37;118;302;1496	60;199;200;501;502;2422	60;200;502;2422
sp|Q9Y4L1|HYOU1_HUMAN	sp|Q9Y4L1|HYOU1_HUMAN	6	6	6	>sp|Q9Y4L1|HYOU1_HUMAN Hypoxia up-regulated protein 1 OS=Homo sapiens OX=9606 GN=HYOU1 PE=1 SV=1	1	6	6	6	6	6	6	9.5	9.5	9.5	111.33	999	999	0	42.446	9.5	6016300	6016300	6016300	10	10				228	187;278;403;908;986;1106	True;True;True;True;True;True	192;288;417;937;1019;1144	223;339;478;1080;1171;1172;1332	373;561;765;1706;1707;1708;1865;1866;1867;1868;2146	373;561;765;1708;1868;2146
sp|Q9Y520|PRC2C_HUMAN;sp|P48634|PRC2A_HUMAN;sp|Q5JSZ5|PRC2B_HUMAN	sp|Q9Y520|PRC2C_HUMAN	5;1;1	5;1;1	5;1;1	>sp|Q9Y520|PRC2C_HUMAN Protein PRRC2C OS=Homo sapiens OX=9606 GN=PRRC2C PE=1 SV=4	3	5	5	5	5	5	5	1.5	1.5	1.5	316.91	2896	2896;2157;2229	0	35.287	1.5	10521000	10521000	10521000	6	6				229	404;625;1124;1244;1490	True;True;True;True;True	418;647;1165;1294;1552	479;754;1353;1504;1781	766;1212;2178;2436;2874;2875	766;1212;2178;2436;2875

## Sheet: proteinGroups_HK-2 sample
Protein IDs	Majority protein IDs	Peptide counts (all)	Peptide counts (razor+unique)	Peptide counts (unique)	Fasta headers	Number of proteins	Peptides	Razor + unique peptides	Unique peptides	Peptides PULLDOWN_12UL_S1_SAMPLE_HK2_16NOV2020.raw	Razor + unique peptides PULLDOWN_12UL_S1_SAMPLE_HK2_16NOV2020.raw	Unique peptides PULLDOWN_12UL_S1_SAMPLE_HK2_16NOV2020.raw	Sequence coverage [%]	Unique + razor sequence coverage [%]	Unique sequence coverage [%]	Mol. weight [kDa]	Sequence length	Sequence lengths	Q-value	Score	Sequence coverage PULLDOWN_12UL_S1_SAMPLE_HK2_16NOV2020.raw [%]	Intensity	Intensity PULLDOWN_12UL_S1_SAMPLE_HK2_16NOV2020.raw	LFQ intensity PULLDOWN_12UL_S1_SAMPLE_HK2_16NOV2020.raw	MS/MS Count PULLDOWN_12UL_S1_SAMPLE_HK2_16NOV2020.raw	MS/MS Count	Only identified by site	Reverse	Potential contaminant	id	Peptide IDs	Peptide is razor	Mod. peptide IDs	Evidence IDs	MS/MS IDs	Best MS/MS	Oxidation (M) site IDs	Oxidation (M) site positions
CON__P00761	CON__P00761	4	4	4	>P00761 SWISS-PROT:P00761|TRYP_PIG Trypsin - Sus scrofa (Pig).	1	4	4	4	4	4	4	25.1	25.1	25.1	24.409	231	231	0	154.99	25.1	6901800000	6901800000	2198900000	136	136			+	0	987;1262;1441;2188	True;True;True;True	1021;1022;1310;1496;2288	1335;1336;1337;1338;1792;1793;2038;2039;2040;2041;2042;2043;2044;2045;2046;2047;2048;2049;2050;2051;2052;2053;2054;2055;2056;2057;2058;2059;2060;3048;3049;3050;3051;3052;3053;3054;3055;3056;3057;3058;3059;3060;3061;3062;3063;3064;3065;3066;3067;3068;3069;3070;3071;3072;3073;3074;3075;3076;3077	2278;2279;2280;2281;2282;2283;3341;3342;3343;3344;3345;3346;3734;3735;3736;3737;3738;3739;3740;3741;3742;3743;3744;3745;3746;3747;3748;3749;3750;3751;3752;3753;3754;3755;3756;3757;3758;3759;3760;3761;3762;3763;3764;3765;3766;5413;5414;5415;5416;5417;5418;5419;5420;5421;5422;5423;5424;5425;5426;5427;5428;5429;5430;5431;5432;5433;5434;5435;5436;5437;5438;5439;5440;5441;5442;5443;5444;5445;5446;5447…	2282;3345;3736;5497	0	94
CON__P02769;CON__P02768-1	CON__P02769	20;1	20;1	19;0	>P02769 SWISS-PROT:P02769 (Bos taurus) Bovine serum albumin precursor	2	20	20	19	20	20	19	39.5	39.5	37.1	69.293	607	607;609	0	161.69	39.5	120990000	120990000	116960000	35	35			+	1	47;228;236;258;429;582;874;1161;1181;1298;1438;1475;1544;1581;1847;1948;2041;2159;2469;2493	True;True;True;True;True;True;True;True;True;True;True;True;True;True;True;True;True;True;True;True	48;235;245;267;445;604;903;1205;1225;1349;1493;1531;1607;1646;1934;2035;2130;2256;2578;2602	63;293;304;329;604;605;798;1162;1578;1606;1607;1842;2035;2105;2193;2249;2250;2588;2589;2712;2713;2837;3001;3448;3449;3450;3475	105;495;518;559;1103;1104;1413;1414;1415;1416;1993;1994;2733;2778;2779;2780;3419;3731;3844;3845;3979;4076;4077;4621;4622;4623;4624;4832;4833;5038;5039;5040;5041;5327;5328;6108;6109;6110;6150	105;495;518;559;1104;1416;1994;2733;2778;3419;3731;3845;3979;4076;4623;4833;5039;5327;6108;6150
CON__P12763	CON__P12763	6	6	5	>P12763 SWISS-PROT:P12763 (Bos taurus) Alpha-2-HS-glycoprotein precursor	1	6	6	5	6	6	5	18.7	18.7	17	38.418	359	359	0	39.744	18.7	28005000	28005000	28005000	6	6			+	2	128;892;1705;1784;1814;2125	True;True;True;True;True;True	132;923;1778;1868;1900;2220	169;1213;2402;2511;2545;2949	278;279;2060;4320;4500;4501;4559;5216;5217;5218	278;2060;4320;4501;4559;5217
sp|O00159|MYO1C_HUMAN	sp|O00159|MYO1C_HUMAN	23	23	23	>sp|O00159|MYO1C_HUMAN Unconventional myosin-Ic OS=Homo sapiens OX=9606 GN=MYO1C PE=1 SV=4	1	23	23	23	23	23	23	28.9	28.9	28.9	121.68	1063	1063	0	255.08	28.9	198370000	198370000	190040000	46	46				3	286;348;361;598;694;706;829;975;1273;1339;1341;1344;1551;1589;1643;1647;1740;1760;2254;2314;2341;2387;2480	True;True;True;True;True;True;True;True;True;True;True;True;True;True;True;True;True;True;True;True;True;True;True	295;361;374;620;721;733;856;1008;1321;1390;1392;1395;1615;1654;1710;1714;1819;1842;2358;2420;2447;2493;2589	367;491;492;513;816;932;945;946;1095;1318;1806;1807;1893;1895;1899;2204;2258;2325;2330;2455;2484;3164;3165;3166;3245;3277;3278;3344;3461	623;911;912;950;951;952;953;1446;1447;1635;1654;1655;1883;1884;2244;2245;3364;3365;3489;3491;3492;3498;3998;3999;4000;4001;4002;4087;4210;4216;4217;4409;4456;5652;5653;5654;5655;5656;5657;5658;5793;5794;5841;5842;5944;5945;6123	623;912;953;1446;1635;1655;1884;2245;3365;3489;3492;3498;4001;4087;4210;4217;4409;4456;5656;5794;5841;5945;6123
sp|O00264|PGRC1_HUMAN	sp|O00264|PGRC1_HUMAN	5	5	4	>sp|O00264|PGRC1_HUMAN Membrane-associated progesterone receptor component 1 OS=Homo sapiens OX=9606 GN=PGRMC1 PE=1 SV=3	1	5	5	4	5	5	4	32.3	32.3	27.7	21.671	195	195	0	40.002	32.3	40633000	40633000	40633000	10	10				4	271;417;679;761;1825	True;True;True;True;True	280;433;706;788;1911	346;590;916;1014;2556	585;1078;1079;1080;1081;1608;1757;1758;4575;4576	585;1079;1608;1758;4576
sp|O00469|PLOD2_HUMAN	sp|O00469|PLOD2_HUMAN	4	4	4	>sp|O00469|PLOD2_HUMAN Procollagen-lysine,2-oxoglutarate 5-dioxygenase 2 OS=Homo sapiens OX=9606 GN=PLOD2 PE=1 SV=2	1	4	4	4	4	4	4	9.2	9.2	9.2	84.685	737	737	0	26.555	9.2	10058000	10058000	10058000	9	9				5	949;951;1053;1074	True;True;True;True	982;984;1092;1114	1288;1290;1420;1445	2200;2202;2203;2204;2205;2206;2430;2477;2478	2200;2203;2430;2478
sp|O00515|LAD1_HUMAN	sp|O00515|LAD1_HUMAN	4	4	4	>sp|O00515|LAD1_HUMAN Ladinin-1 OS=Homo sapiens OX=9606 GN=LAD1 PE=1 SV=2	1	4	4	4	4	4	4	13.3	13.3	13.3	57.13	517	517	0	27.63	13.3	11159000	11159000	11159000	6	6				6	769;1629;1660;1824	True;True;True;True	796;1696;1728;1910	1025;2310;2345;2555	1774;1775;4182;4241;4242;4574	1775;4182;4242;4574
sp|O00571|DDX3X_HUMAN;sp|O15523|DDX3Y_HUMAN;sp|Q9NQI0|DDX4_HUMAN	sp|O00571|DDX3X_HUMAN;sp|O15523|DDX3Y_HUMAN	6;5;1	5;4;1	5;4;1	>sp|O00571|DDX3X_HUMAN ATP-dependent RNA helicase DDX3X OS=Homo sapiens OX=9606 GN=DDX3X PE=1 SV=3;>sp|O15523|DDX3Y_HUMAN ATP-dependent RNA helicase DDX3Y OS=Homo sapiens OX=9606 GN=DDX3Y PE=1 SV=2	3	6	5	5	6	5	5	12.4	10.7	10.7	73.243	662	662;660;724	0	32.263	12.4	11836000	11836000	11836000	6	6				7	894;1537;1970;2018;2251;2487	True;False;True;True;True;True	925;1598;2058;2107;2355;2596	1215;2184;2742;2806;2807;3161;3468	2064;2065;3970;4875;4974;4975;5649;6135	2064;3970;4875;4975;5649;6135
sp|O14950|ML12B_HUMAN;sp|P19105|ML12A_HUMAN	sp|O14950|ML12B_HUMAN;sp|P19105|ML12A_HUMAN	11;10	4;3	4;3	>sp|O14950|ML12B_HUMAN Myosin regulatory light chain 12B OS=Homo sapiens OX=9606 GN=MYL12B PE=1 SV=2;>sp|P19105|ML12A_HUMAN Myosin regulatory light chain 12A OS=Homo sapiens OX=9606 GN=MYL12A PE=1 SV=2	2	11	4	4	11	4	4	83.7	41.9	41.9	19.779	172	172;171	0	78.992	83.7	176540000	176540000	176000000	12	12				8	207;277;405;424;434;522;663;1114;1364;1566;1648	False;False;False;False;False;False;True;True;False;True;True	212;213;286;420;421;440;450;541;689;1156;1415;1630;1715	263;264;265;266;353;354;355;356;574;575;576;577;598;611;612;718;898;1502;1922;2224;2225;2331	442;443;444;445;446;447;448;449;450;451;595;596;597;598;599;600;601;602;603;1054;1055;1056;1057;1058;1093;1111;1112;1113;1293;1294;1295;1576;1577;1578;2594;2595;3527;3528;3529;3530;4034;4035;4036;4037;4038;4039;4218	448;600;1058;1093;1112;1295;1578;2594;3528;4036;4218	1;2	25;40
sp|O14974|MYPT1_HUMAN;sp|O60237|MYPT2_HUMAN	sp|O14974|MYPT1_HUMAN	11;1	11;1	11;1	>sp|O14974|MYPT1_HUMAN Protein phosphatase 1 regulatory subunit 12A OS=Homo sapiens OX=9606 GN=PPP1R12A PE=1 SV=1	2	11	11	11	11	11	11	12.1	12.1	12.1	115.28	1030	1030;982	0	89.943	12.1	38841000	38841000	37562000	22	22				9	172;1294;1493;1813;1838;1906;1909;2005;2142;2248;2249	True;True;True;True;True;True;True;True;True;True;True	177;1345;1549;1899;1925;1993;1996;2094;2237;2352;2353	222;1836;2126;2544;2577;2662;2665;2786;2970;2971;3157;3158;3159	372;373;3409;3883;4558;4607;4750;4759;4943;5253;5254;5633;5634;5635;5636;5637;5638;5639;5640;5641;5642;5643;5644	373;3409;3883;4558;4607;4750;4759;4943;5253;5640;5642
sp|O43175|SERA_HUMAN	sp|O43175|SERA_HUMAN	4	4	4	>sp|O43175|SERA_HUMAN D-3-phosphoglycerate dehydrogenase OS=Homo sapiens OX=9606 GN=PHGDH PE=1 SV=4	1	4	4	4	4	4	4	10.3	10.3	10.3	56.65	533	533	0	22.955	10.3	7446100	7446100	7446100	4	4				10	89;144;323;816	True;True;True;True	91;149;332;843	120;189;416;1079	193;194;318;709;1862	193;318;709;1862
sp|O43707|ACTN4_HUMAN	sp|O43707|ACTN4_HUMAN	14	9	9	>sp|O43707|ACTN4_HUMAN Alpha-actinin-4 OS=Homo sapiens OX=9606 GN=ACTN4 PE=1 SV=2	1	14	9	9	14	9	9	20.9	14.8	14.8	104.85	911	911	0	65.09	20.9	38503000	38503000	38503000	11	11				11	90;185;319;751;1205;1427;1434;1536;1559;1754;1780;2095;2220;2255	True;False;False;True;False;True;True;True;True;True;True;False;True;False	92;190;328;778;1249;1482;1489;1597;1623;1833;1864;2188;2323;2359	121;236;412;1002;1635;2023;2031;2183;2215;2472;2507;2912;3118;3119;3167	195;394;705;1740;2820;2821;3711;3725;3968;3969;4020;4438;4495;5166;5567;5568;5569;5570;5659	195;394;705;1740;2821;3711;3725;3968;4020;4438;4495;5166;5568;5659
sp|O43795|MYO1B_HUMAN;sp|Q9UBC5|MYO1A_HUMAN	sp|O43795|MYO1B_HUMAN	15;1	15;1	15;1	>sp|O43795|MYO1B_HUMAN Unconventional myosin-Ib OS=Homo sapiens OX=9606 GN=MYO1B PE=1 SV=3	2	15	15	15	15	15	15	19.9	19.9	19.9	131.98	1136	1136;1043	0	126.73	19.9	88216000	88216000	86258000	31	31				12	9;146;549;632;947;1269;1570;1590;1645;1911;2138;2139;2333;2496;2503	True;True;True;True;True;True;True;True;True;True;True;True;True;True;True	9;151;570;656;980;1317;1634;1635;1655;1712;1998;2233;2234;2439;2605;2613	12;191;753;858;1286;1800;1801;2229;2230;2231;2232;2259;2260;2327;2669;2670;2965;2966;3267;3479;3488	25;322;323;1348;1349;1510;2196;2197;2198;3353;3354;4048;4049;4050;4051;4052;4053;4088;4089;4090;4091;4092;4212;4771;4772;4773;4774;5245;5246;5247;5823;6154;6168	25;323;1349;1510;2198;3353;4048;4092;4212;4771;5245;5246;5823;6154;6168	3;4	258;264
sp|O43852|CALU_HUMAN	sp|O43852|CALU_HUMAN	7	7	7	>sp|O43852|CALU_HUMAN Calumenin OS=Homo sapiens OX=9606 GN=CALU PE=1 SV=2	1	7	7	7	7	7	7	33.3	33.3	33.3	37.106	315	315	0	51.766	33.3	22496000	22496000	22496000	11	11				13	303;389;449;452;875;1499;2062	True;True;True;True;True;True;True	312;403;465;468;904;1555;2153	386;555;629;633;1163;2132;2865	650;1021;1139;1140;1141;1152;1995;3898;5093;5094;5095	650;1021;1139;1152;1995;3898;5094
sp|O75369|FLNB_HUMAN	sp|O75369|FLNB_HUMAN	74	66	65	>sp|O75369|FLNB_HUMAN Filamin-B OS=Homo sapiens OX=9606 GN=FLNB PE=1 SV=2	1	74	66	65	74	66	65	41.2	38.9	38.2	278.16	2602	2602	0	323.31	41.2	345420000	345420000	345420000	103	103				14	30;52;86;88;95;161;162;227;239;244;285;288;308;309;409;427;576;587;642;672;684;687;767;774;801;893;942;943;944;968;1029;1035;1044;1124;1183;1225;1271;1279;1331;1379;1460;1505;1507;1596;1671;1683;1735;1771;1842;1899;1965;1969;1996;2063;2191;2202;2222;2229;2239;2261;2262;2288;2302;2315;2317;2328;2358;2379;2393;2411;2430;2454;2455;2491	True;True;True;True;True;True;True;True;True;True;True;True;False;False;True;True;True;True;True;True;True;True;True;True;True;True;True;True;True;True;True;True;False;False;True;True;True;False;False;True;True;True;True;True;True;True;True;False;True;True;True;True;True;True;True;True;True;True;True;True;True;True;True;True;True;True;True;True;True;False;True;True;True;True	30;53;88;90;97;166;167;234;248;253;294;297;317;318;425;443;598;609;666;699;711;714;794;801;828;924;975;976;977;1001;1067;1074;1083;1166;1227;1271;1319;1328;1382;1431;1516;1563;1565;1661;1741;1753;1814;1854;1929;1987;2053;2057;2085;2154;2291;2302;2326;2333;2343;2365;2366;2393;2408;2421;2423;2434;2464;2485;2499;2519;2539;2563;2564;2600	44;69;117;119;127;207;208;291;292;308;313;366;369;392;393;582;602;790;803;804;870;908;921;924;1021;1031;1060;1214;1281;1282;1283;1310;1388;1397;1409;1515;1609;1748;1803;1804;1817;1884;1939;2088;2140;2142;2266;2361;2374;2450;2497;2581;2656;2736;2740;2741;2775;2866;3080;3092;3123;3132;3144;3173;3174;3212;3233;3246;3248;3262;3300;3332;3351;3376;3400;3430;3431;3432;3472	81;113;188;190;191;192;205;348;349;493;494;525;526;535;621;622;625;659;660;661;1065;1066;1100;1401;1424;1425;1531;1532;1595;1616;1617;1618;1619;1624;1625;1626;1767;1785;1786;1787;1832;1833;2061;2062;2063;2189;2190;2191;2234;2363;2364;2365;2385;2386;2409;2614;2782;3266;3359;3360;3361;3362;3379;3380;3381;3470;3471;3556;3813;3908;3910;4103;4262;4282;4400;4401;4402;4482;4613;4614;4729;4730;4865;4866;…	81;113;188;192;205;348;349;494;525;535;622;625;659;661;1065;1100;1401;1424;1531;1595;1618;1626;1767;1787;1832;2062;2189;2190;2191;2234;2364;2386;2409;2614;2782;3266;3360;3381;3471;3556;3813;3908;3910;4103;4262;4282;4402;4482;4613;4729;4867;4873;4926;5096;5508;5522;5577;5593;5610;5669;5670;5739;5777;5795;5798;5817;5873;5927;5958;5999;6036;6085;6087;6144
sp|O75396|SC22B_HUMAN	sp|O75396|SC22B_HUMAN	4	4	4	>sp|O75396|SC22B_HUMAN Vesicle-trafficking protein SEC22b OS=Homo sapiens OX=9606 GN=SEC22B PE=1 SV=4	1	4	4	4	4	4	4	23.7	23.7	23.7	24.593	215	215	0	26.975	23.7	15812000	15812000	15812000	6	6				15	326;1617;2174;2306	True;True;True;True	335;1682;2273;2412	419;2292;3024;3237	712;4153;5362;5363;5782;5783	712;4153;5362;5783
sp|O75947|ATP5H_HUMAN	sp|O75947|ATP5H_HUMAN	4	4	4	>sp|O75947|ATP5H_HUMAN ATP synthase subunit d, mitochondrial OS=Homo sapiens OX=9606 GN=ATP5PD PE=1 SV=3	1	4	4	4	4	4	4	35.4	35.4	35.4	18.491	161	161	0	33.386	35.4	39037000	39037000	39037000	5	5				16	1191;1618;1874;2015	True;True;True;True	1235;1683;1961;2104	1619;2293;2621;2800	2798;4154;4155;4676;4963	2798;4155;4676;4963
sp|O94925|GLSK_HUMAN	sp|O94925|GLSK_HUMAN	13	13	13	>sp|O94925|GLSK_HUMAN Glutaminase kidney isoform, mitochondrial OS=Homo sapiens OX=9606 GN=GLS PE=1 SV=1	1	13	13	13	13	13	13	26.2	26.2	26.2	73.46	669	669	0	136.87	26.2	132750000	132750000	118560000	20	20				17	529;603;658;810;1453;1500;1586;1719;2175;2319;2352;2424;2518	True;True;True;True;True;True;True;True;True;True;True;True;True	548;625;684;837;1509;1556;1651;1795;1796;2274;2425;2458;2532;2628	726;822;892;1070;1071;1072;2078;2133;2255;2425;2426;2427;2428;3025;3250;3291;3292;3391;3392;3508	1306;1454;1568;1569;1570;1847;1848;1849;1850;3798;3899;4083;4366;4367;4368;4369;5364;5800;5860;5861;6022;6023;6024;6197	1306;1454;1570;1849;3798;3899;4083;4366;5364;5800;5860;6023;6197
sp|O95425|SVIL_HUMAN	sp|O95425|SVIL_HUMAN	7	7	7	>sp|O95425|SVIL_HUMAN Supervillin OS=Homo sapiens OX=9606 GN=SVIL PE=1 SV=2	1	7	7	7	7	7	7	4.9	4.9	4.9	247.74	2214	2214	0	83.034	4.9	11723000	11723000	11723000	8	8				18	5;155;250;505;660;2127;2502	True;True;True;True;True;True;True	5;160;259;523;686;2222;2612	6;201;320;699;894;2952;3487	13;339;340;542;1256;1572;5222;6167	13;339;542;1256;1572;5222;6167
sp|O95816|BAG2_HUMAN	sp|O95816|BAG2_HUMAN	4	4	4	>sp|O95816|BAG2_HUMAN BAG family molecular chaperone regulator 2 OS=Homo sapiens OX=9606 GN=BAG2 PE=1 SV=1	1	4	4	4	4	4	4	28	28	28	23.772	211	211	0	108.36	28	13114000	13114000	13114000	8	8				19	487;1325;1916;2113	True;True;True;True	503;1376;2003;2207	671;1878;2675;2933	1213;1214;1215;1216;3463;3464;4779;5191	1214;3463;4779;5191
sp|O95831|AIFM1_HUMAN	sp|O95831|AIFM1_HUMAN	4	4	4	>sp|O95831|AIFM1_HUMAN Apoptosis-inducing factor 1, mitochondrial OS=Homo sapiens OX=9606 GN=AIFM1 PE=1 SV=1	1	4	4	4	4	4	4	7.7	7.7	7.7	66.9	613	613	0	23.679	7.7	12057000	12057000	12057000	4	4				20	130;531;1054;1870	True;True;True;True	134;550;1093;1957	171;728;1421;2617	282;1308;2431;4671	282;1308;2431;4671
sp|P00338|LDHA_HUMAN;sp|Q6ZMR3|LDH6A_HUMAN;sp|P07864|LDHC_HUMAN	sp|P00338|LDHA_HUMAN	6;1;1	5;0;0	5;0;0	>sp|P00338|LDHA_HUMAN L-lactate dehydrogenase A chain OS=Homo sapiens OX=9606 GN=LDHA PE=1 SV=2	3	6	5	5	6	5	5	23.5	19.9	19.9	36.688	332	332;332;332	0	33.9	23.5	15107000	15107000	15107000	7	7				21	394;841;1332;1863;2105;2269	True;True;True;True;True;False	408;868;1383;1950;2198;2373	560;1115;1885;2608;2924;3182	1034;1921;3472;3473;3474;4654;5179;5681	1034;1921;3474;4654;5179;5681
sp|P00367|DHE3_HUMAN;sp|P49448|DHE4_HUMAN	sp|P00367|DHE3_HUMAN;sp|P49448|DHE4_HUMAN	5;3	5;3	5;3	>sp|P00367|DHE3_HUMAN Glutamate dehydrogenase 1, mitochondrial OS=Homo sapiens OX=9606 GN=GLUD1 PE=1 SV=2;>sp|P49448|DHE4_HUMAN Glutamate dehydrogenase 2, mitochondrial OS=Homo sapiens OX=9606 GN=GLUD2 PE=1 SV=2	2	5	5	5	5	5	5	11.8	11.8	11.8	61.397	558	558;558	0	30.23	11.8	17159000	17159000	17159000	7	7				22	110;857;1555;2495;2510	True;True;True;True;True	112;886;1619;2604;2620	146;1135;2210;3478;3498	241;242;1954;4013;4014;6153;6184	241;1954;4014;6153;6184
sp|P00387|NB5R3_HUMAN	sp|P00387|NB5R3_HUMAN	5	5	5	>sp|P00387|NB5R3_HUMAN NADH-cytochrome b5 reductase 3 OS=Homo sapiens OX=9606 GN=CYB5R3 PE=1 SV=3	1	5	5	5	5	5	5	22.6	22.6	22.6	34.234	301	301	0	43.568	22.6	21628000	21628000	21628000	6	6				23	157;297;486;791;2008	True;True;True;True;True	162;306;502;818;2097	203;380;670;1049;2789	343;639;1212;1814;1815;4946	343;639;1212;1815;4946
sp|P00505|AATM_HUMAN	sp|P00505|AATM_HUMAN	6	6	6	>sp|P00505|AATM_HUMAN Aspartate aminotransferase, mitochondrial OS=Homo sapiens OX=9606 GN=GOT2 PE=1 SV=3	1	6	6	6	6	6	6	14.9	14.9	14.9	47.517	430	430	0	39.637	14.9	18655000	18655000	18655000	8	8				24	240;674;905;956;1688;2236	True;True;True;True;True;True	249;701;937;989;1758;2340	309;910;1235;1295;2380;3141	527;528;1598;2096;2212;4288;4289;5607	527;1598;2096;2212;4288;5607
sp|P00558|PGK1_HUMAN;sp|P07205|PGK2_HUMAN	sp|P00558|PGK1_HUMAN	13;4	13;4	13;4	>sp|P00558|PGK1_HUMAN Phosphoglycerate kinase 1 OS=Homo sapiens OX=9606 GN=PGK1 PE=1 SV=3	2	13	13	13	13	13	13	42.7	42.7	42.7	44.614	417	417;417	0	94.808	42.7	60838000	60838000	60838000	16	16				25	22;126;380;626;699;1261;1640;2014;2076;2197;2307;2309;2423	True;True;True;True;True;True;True;True;True;True;True;True;True	22;130;394;650;726;1309;1707;2103;2167;2297;2413;2415;2531	32;165;166;546;850;937;1790;1791;2322;2799;2885;3086;3238;3240;3390	57;58;271;272;273;1008;1498;1644;3339;3340;4204;4962;5129;5515;5784;5786;6021	57;272;1008;1498;1644;3339;4204;4962;5129;5515;5784;5786;6021
sp|P02545|LMNA_HUMAN	sp|P02545|LMNA_HUMAN	4	4	4	>sp|P02545|LMNA_HUMAN Prelamin-A/C OS=Homo sapiens OX=9606 GN=LMNA PE=1 SV=1	1	4	4	4	4	4	4	7.5	7.5	7.5	74.139	664	664	0	28.304	7.5	6483200	6483200	6483200	5	5				26	20;435;1662;1898	True;True;True;True	20;451;1730;1986	30;613;2347;2655	54;55;1114;4244;4728	55;1114;4244;4728
sp|P04075|ALDOA_HUMAN	sp|P04075|ALDOA_HUMAN	10	10	10	>sp|P04075|ALDOA_HUMAN Fructose-bisphosphate aldolase A OS=Homo sapiens OX=9606 GN=ALDOA PE=1 SV=2	1	10	10	10	10	10	10	36.8	36.8	36.8	39.42	364	364	0	76.758	36.8	55912000	55912000	53000000	14	14				27	25;135;528;747;833;959;1410;1411;1691;2204	True;True;True;True;True;True;True;True;True;True	25;140;547;774;860;992;1465;1466;1761;2305	36;179;725;997;1100;1101;1299;2002;2003;2004;2383;2384;3097	65;302;1305;1733;1734;1891;1892;2216;3667;3668;3669;4292;4293;5530;5531	65;302;1305;1734;1892;2216;3668;3669;4293;5531
sp|P04181|OAT_HUMAN	sp|P04181|OAT_HUMAN	4	4	4	>sp|P04181|OAT_HUMAN Ornithine aminotransferase, mitochondrial OS=Homo sapiens OX=9606 GN=OAT PE=1 SV=1	1	4	4	4	4	4	4	13.9	13.9	13.9	48.534	439	439	0	27.877	13.9	13012000	13012000	13012000	6	6				28	72;2160;2310;2452	True;True;True;True	74;2257;2416;2561	93;3002;3241;3427	153;154;5329;5330;5787;6082	153;5330;5787;6082
sp|P04406|G3P_HUMAN	sp|P04406|G3P_HUMAN	10	10	10	>sp|P04406|G3P_HUMAN Glyceraldehyde-3-phosphate dehydrogenase OS=Homo sapiens OX=9606 GN=GAPDH PE=1 SV=3	1	10	10	10	10	10	10	45.4	45.4	45.4	36.053	335	335	0	174	45.4	412110000	412110000	366010000	48	48				29	75;691;1290;1472;1856;2203;2270;2272;2356;2398	True;True;True;True;True;True;True;True;True;True	77;718;1340;1528;1943;2303;2304;2374;2375;2377;2462;2505;2506	96;97;929;1831;2101;2600;3093;3094;3095;3096;3183;3184;3185;3186;3187;3188;3190;3191;3297;3298;3357;3358;3359	159;160;161;162;1631;3397;3398;3399;3400;3401;3402;3834;3835;3836;3837;4640;4641;4642;5524;5525;5526;5527;5528;5529;5682;5683;5684;5685;5686;5687;5688;5689;5690;5691;5692;5693;5694;5695;5697;5698;5699;5700;5701;5869;5870;5967;5968;5969;5970	160;1631;3400;3835;4641;5528;5693;5700;5869;5968	5;6;7	46;175;331
sp|P04792|HSPB1_HUMAN	sp|P04792|HSPB1_HUMAN	8	8	8	>sp|P04792|HSPB1_HUMAN Heat shock protein beta-1 OS=Homo sapiens OX=9606 GN=HSPB1 PE=1 SV=2	1	8	8	8	8	8	8	59	59	59	22.782	205	205	0	82.715	59	61229000	61229000	61229000	16	16				30	793;1188;1210;1247;1684;1703;2096;2376	True;True;True;True;True;True;True;True	820;1232;1254;1294;1754;1775;1776;2189;2482	1051;1616;1641;1773;2375;2399;2400;2913;2914;3328	1817;1818;2789;2790;2791;2792;2793;2832;3308;3309;4283;4316;4317;5167;5168;5919;5920;5921;5922	1817;2793;2832;3309;4283;4316;5167;5921
sp|P04843|RPN1_HUMAN	sp|P04843|RPN1_HUMAN	16	16	16	>sp|P04843|RPN1_HUMAN Dolichyl-diphosphooligosaccharide--protein glycosyltransferase subunit 1 OS=Homo sapiens OX=9606 GN=RPN1 PE=1 SV=1	1	16	16	16	16	16	16	35.1	35.1	35.1	68.569	607	607	0	118.86	35.1	130660000	130660000	127620000	25	25				31	139;206;300;383;645;852;1310;1601;1718;1882;2087;2094;2152;2173;2265;2377	True;True;True;True;True;True;True;True;True;True;True;True;True;True;True;True	144;211;309;397;669;881;1361;1666;1794;1969;2179;2187;2248;2272;2369;2483	184;262;383;549;874;1130;1859;1860;2271;2424;2630;2902;2911;2991;3022;3023;3177;3329;3330	309;441;642;1011;1537;1538;1948;3438;3439;4109;4362;4363;4364;4365;4688;4689;4690;5149;5150;5151;5152;5165;5311;5359;5360;5361;5673;5674;5923;5924	309;441;642;1011;1538;1948;3439;4109;4362;4689;5149;5165;5311;5361;5673;5924
sp|P04844|RPN2_HUMAN	sp|P04844|RPN2_HUMAN	10	10	10	>sp|P04844|RPN2_HUMAN Dolichyl-diphosphooligosaccharide--protein glycosyltransferase subunit 2 OS=Homo sapiens OX=9606 GN=RPN2 PE=1 SV=3	1	10	10	10	10	10	10	27.9	27.9	27.9	69.283	631	631	0	83.197	27.9	40023000	40023000	40023000	20	20				32	187;1216;1416;1430;1533;1710;1926;2077;2467;2468	True;True;True;True;True;True;True;True;True;True	192;1262;1471;1485;1593;1594;1784;2013;2168;2576;2577	238;1737;2010;2026;2178;2179;2180;2408;2685;2886;3446;3447	397;398;399;400;401;3242;3243;3690;3691;3692;3714;3715;3963;3964;3965;4330;4792;5130;6105;6106;6107	398;3242;3691;3715;3963;4330;4792;5130;6106;6107	8	620
sp|P04899|GNAI2_HUMAN;sp|P63096|GNAI1_HUMAN;sp|P11488|GNAT1_HUMAN;sp|P19087|GNAT2_HUMAN;sp|P09471|GNAO_HUMAN;sp|A8MTJ3|GNAT3_HUMAN;sp|P38405|GNAL_HUMAN;sp|P63092|GNAS2_HUMAN;sp|Q5JWF2|GNAS1_HUMAN	sp|P04899|GNAI2_HUMAN	5;2;1;1;1;1;1;1;1	5;2;1;1;1;1;1;1;1	3;0;0;0;0;0;0;0;0	>sp|P04899|GNAI2_HUMAN Guanine nucleotide-binding protein G(i) subunit alpha-2 OS=Homo sapiens OX=9606 GN=GNAI2 PE=1 SV=3	9	5	5	3	5	5	3	18.9	18.9	12.1	40.45	355	355;354;350;354;354;354;381;394;1037	0	37.353	18.9	31985000	31985000	31985000	8	8				33	494;585;915;1334;2433	True;True;True;True;True	511;607;948;1385;2542	684;801;1252;1887;3404	1238;1239;1421;2139;2140;3478;3479;6049	1239;1421;2140;3479;6049
sp|P05023|AT1A1_HUMAN;sp|P13637|AT1A3_HUMAN;sp|P50993|AT1A2_HUMAN;sp|P20648|ATP4A_HUMAN;sp|Q13733|AT1A4_HUMAN;sp|P54707|AT12A_HUMAN	sp|P05023|AT1A1_HUMAN;sp|P13637|AT1A3_HUMAN	8;4;3;2;1;1	8;4;3;2;1;1	8;4;3;2;1;1	>sp|P05023|AT1A1_HUMAN Sodium/potassium-transporting ATPase subunit alpha-1 OS=Homo sapiens OX=9606 GN=ATP1A1 PE=1 SV=1;>sp|P13637|AT1A3_HUMAN Sodium/potassium-transporting ATPase subunit alpha-3 OS=Homo sapiens OX=9606 GN=ATP1A3 PE=1 SV=3	6	8	8	8	8	8	8	9.6	9.6	9.6	112.89	1023	1023;1013;1020;1035;1029;1039	0	52.039	9.6	24578000	24578000	24578000	10	10				34	18;216;1365;1644;1964;2206;2275;2463	True;True;True;True;True;True;True;True	18;222;1416;1711;2052;2307;2380;2572	26;277;1923;2326;2735;3099;3194;3441	48;469;3531;4211;4862;4863;4864;5533;5704;6100	48;469;3531;4211;4864;5533;5704;6100
sp|P05106|ITB3_HUMAN	sp|P05106|ITB3_HUMAN	4	4	4	>sp|P05106|ITB3_HUMAN Integrin beta-3 OS=Homo sapiens OX=9606 GN=ITGB3 PE=1 SV=2	1	4	4	4	4	4	4	6.1	6.1	6.1	87.057	788	788	0	27.653	6.1	6854100	6854100	6854100	6	6				35	808;1895;2048;2085	True;True;True;True	835;1982;2137;2177	1068;2650;2844;2900	1844;1845;4720;5054;5055;5147	1845;4720;5055;5147
sp|P05141|ADT2_HUMAN;sp|Q9H0C2|ADT4_HUMAN	sp|P05141|ADT2_HUMAN	11;2	11;2	4;0	>sp|P05141|ADT2_HUMAN ADP/ATP translocase 2 OS=Homo sapiens OX=9606 GN=SLC25A5 PE=1 SV=7	2	11	11	4	11	11	4	36.9	36.9	16.1	32.852	298	298;315	0	87.549	36.9	244280000	244280000	210780000	17	17				36	21;268;547;697;764;812;1337;1543;1733;2038;2451	True;True;True;True;True;True;True;True;True;True;True	21;277;568;724;791;839;1388;1605;1606;1812;2127;2560	31;342;750;935;1017;1074;1890;1891;2191;2192;2448;2833;2834;3426	56;578;1344;1345;1639;1640;1763;1853;1854;3485;3486;3977;3978;4396;4397;5033;5034;6080;6081	56;578;1345;1640;1763;1853;3486;3978;4397;5033;6081	9;10	238;239
sp|P05387|RLA2_HUMAN	sp|P05387|RLA2_HUMAN	6	6	5	>sp|P05387|RLA2_HUMAN 60S acidic ribosomal protein P2 OS=Homo sapiens OX=9606 GN=RPLP2 PE=1 SV=1	1	6	6	5	6	6	5	84.3	84.3	69.6	11.665	115	115	0	59.059	84.3	129700000	129700000	125330000	18	18				37	1000;1001;1106;1209;1600;2515	True;True;True;True;True;True	1035;1036;1147;1148;1253;1665;2625	1351;1352;1493;1494;1639;1640;2270;3504	2300;2301;2302;2575;2576;2577;2578;2825;2826;2827;2828;2829;2830;2831;4107;4108;6192;6193	2300;2302;2577;2831;4107;6192	11	109
sp|P05388|RLA0_HUMAN;sp|Q8NHW5|RLA0L_HUMAN	sp|P05388|RLA0_HUMAN;sp|Q8NHW5|RLA0L_HUMAN	6;5	6;5	6;5	>sp|P05388|RLA0_HUMAN 60S acidic ribosomal protein P0 OS=Homo sapiens OX=9606 GN=RPLP0 PE=1 SV=1;>sp|Q8NHW5|RLA0L_HUMAN 60S acidic ribosomal protein P0-like OS=Homo sapiens OX=9606 GN=RPLP0P6 PE=5 SV=1	2	6	6	6	6	6	6	31.2	31.2	31.2	34.273	317	317;317	0	47.954	31.2	58277000	58277000	58277000	12	12				38	66;76;339;739;986;2136	True;True;True;True;True;True	67;78;352;766;1020;2231	84;98;99;481;987;1334;2963	136;163;164;165;166;898;1711;1712;2276;2277;5242;5243	136;164;898;1711;2277;5242
sp|P05556|ITB1_HUMAN	sp|P05556|ITB1_HUMAN	8	8	8	>sp|P05556|ITB1_HUMAN Integrin beta-1 OS=Homo sapiens OX=9606 GN=ITGB1 PE=1 SV=2	1	8	8	8	8	8	8	13.2	13.2	13.2	88.414	798	798	0	67.117	13.2	35138000	35138000	35138000	11	11				39	430;594;713;1048;1111;1872;1945;1961	True;True;True;True;True;True;True;True	446;616;740;1087;1153;1959;2032;2049	606;812;956;1414;1499;2619;2709;2732	1105;1439;1668;1669;2421;2422;2423;2591;4673;4829;4859	1105;1439;1668;2421;2591;4673;4829;4859
sp|P05783|K1C18_HUMAN;sp|Q92764|KRT35_HUMAN	sp|P05783|K1C18_HUMAN	7;2	7;2	3;0	>sp|P05783|K1C18_HUMAN Keratin, type I cytoskeletal 18 OS=Homo sapiens OX=9606 GN=KRT18 PE=1 SV=2	2	7	7	3	7	7	3	23.7	23.7	14.2	48.057	430	430;455	0	63.171	23.7	94183000	94183000	94183000	9	9				40	563;1189;1320;1698;1943;2162;2426	True;True;True;True;True;True;True	584;1233;1371;1769;2030;2259;2534	770;1617;1872;2393;2707;3004;3394	1374;2794;3454;3455;4305;4827;5333;6026;6027;6028	1374;2794;3455;4305;4827;5333;6028
sp|P06576|ATPB_HUMAN	sp|P06576|ATPB_HUMAN	21	21	21	>sp|P06576|ATPB_HUMAN ATP synthase subunit beta, mitochondrial OS=Homo sapiens OX=9606 GN=ATP5F1B PE=1 SV=3	1	21	21	21	21	21	21	56.3	56.3	56.3	56.559	529	529	0	323.31	56.3	578360000	578360000	521030000	92	92				41	99;354;472;637;667;726;967;1014;1019;1033;1474;1952;1953;2088;2133;2158;2180;2181;2295;2296;2397	True;True;True;True;True;True;True;True;True;True;True;True;True;True;True;True;True;True;True;True;True	101;367;488;661;694;753;1000;1050;1051;1057;1071;1072;1530;2039;2040;2180;2181;2228;2254;2255;2279;2280;2281;2401;2402;2504	132;133;499;500;501;502;503;656;864;865;903;972;1309;1368;1369;1370;1377;1392;1393;1394;1395;2103;2104;2717;2718;2719;2720;2721;2903;2904;2959;2998;2999;3000;3034;3035;3036;3037;3223;3224;3356	218;219;220;221;222;924;925;926;927;928;929;930;931;932;933;934;935;936;1187;1519;1520;1521;1522;1523;1586;1587;1691;1692;2232;2233;2329;2330;2331;2332;2333;2345;2346;2347;2348;2372;2373;2374;2375;2376;2377;2378;2379;2380;2381;3841;3842;3843;4837;4838;4839;4840;4841;4842;4843;4844;4845;5153;5154;5155;5156;5236;5237;5238;5322;5323;5324;5325;5326;5377;5378;5379;5380;5381;5382;5383;5384;5385;5386;53…	219;931;1187;1523;1586;1691;2233;2333;2345;2380;3842;4839;4844;5156;5236;5325;5377;5382;5759;5764;5966	12;13;14;15;16;17	113;217;272;339;342;408
sp|P06702|S10A9_HUMAN	sp|P06702|S10A9_HUMAN	6	6	6	>sp|P06702|S10A9_HUMAN Protein S100-A9 OS=Homo sapiens OX=9606 GN=S100A9 PE=1 SV=1	1	6	6	6	6	6	6	63.2	63.2	63.2	13.242	114	114	0	40.587	63.2	18198000	18198000	18198000	6	6				42	1098;1264;1462;1602;1765;2267	True;True;True;True;True;True	1138;1312;1518;1667;1848;2371	1479;1795;2090;2272;2491;3179	2548;3348;3815;4110;4472;5677;5678	2548;3348;3815;4110;4472;5678
sp|P06733|ENOA_HUMAN;sp|P13929|ENOB_HUMAN;sp|P09104|ENOG_HUMAN	sp|P06733|ENOA_HUMAN	15;1;1	15;1;1	15;1;1	>sp|P06733|ENOA_HUMAN Alpha-enolase OS=Homo sapiens OX=9606 GN=ENO1 PE=1 SV=2	3	15	15	15	15	15	15	38.9	38.9	38.9	47.168	434	434;434;434	0	149.27	38.9	157320000	157320000	153700000	24	24				43	19;213;395;470;933;954;1139;1199;1202;1355;1593;1875;1893;2338;2471	True;True;True;True;True;True;True;True;True;True;True;True;True;True;True	19;219;409;486;966;987;1181;1243;1246;1406;1658;1962;1980;2444;2580	27;28;29;272;273;274;561;654;1271;1293;1534;1629;1632;1912;2263;2622;2648;3274;3452	49;50;51;52;53;460;461;462;1035;1036;1185;2175;2210;2651;2811;2817;3515;3516;4098;4677;4715;4716;4717;5836;5837;6113	49;461;1036;1185;2175;2210;2651;2811;2817;3516;4098;4677;4716;5837;6113	18	169
sp|P06748|NPM_HUMAN	sp|P06748|NPM_HUMAN	6	6	6	>sp|P06748|NPM_HUMAN Nucleophosmin OS=Homo sapiens OX=9606 GN=NPM1 PE=1 SV=2	1	6	6	6	6	6	6	28.6	28.6	28.6	32.575	294	294	0	69.693	28.6	99595000	99595000	99595000	10	10				44	31;264;792;1552;1553;2205	True;True;True;True;True;True	31;273;819;1616;1617;2306	45;336;1050;2205;2206;2207;2208;3098	82;570;1816;4003;4004;4005;4006;4007;4008;5532	82;570;1816;4003;4008;5532
sp|P06753|TPM3_HUMAN	sp|P06753|TPM3_HUMAN	19	7	6	>sp|P06753|TPM3_HUMAN Tropomyosin alpha-3 chain OS=Homo sapiens OX=9606 GN=TPM3 PE=1 SV=2	1	19	7	6	19	7	6	48.1	20.7	17.5	32.95	285	285	0	134.21	48.1	260510000	260510000	195890000	23	23				45	3;106;259;813;814;862;1041;1140;1187;1220;1297;1303;1469;1513;1835;1936;2439;2505;2507	True;False;True;False;False;True;False;True;False;False;False;False;True;True;False;False;False;False;True	3;108;268;840;841;891;1080;1182;1231;1266;1348;1354;1525;1571;1572;1922;2023;2548;2615;2617	4;141;330;1075;1076;1145;1404;1405;1406;1535;1536;1613;1614;1615;1741;1742;1743;1840;1841;1849;1850;1851;2098;2149;2150;2151;2572;2573;2699;2700;3410;3411;3412;3492;3493;3495	10;11;233;560;1855;1856;1857;1858;1967;2398;2399;2400;2401;2402;2403;2404;2405;2406;2652;2653;2654;2655;2786;2787;2788;3250;3251;3252;3253;3417;3418;3426;3427;3428;3429;3825;3918;3919;3920;3921;3922;3923;3924;3925;3926;3927;3928;3929;3930;4597;4598;4599;4816;4817;4818;6056;6057;6058;6173;6174;6175;6181	11;233;560;1856;1858;1967;2399;2654;2787;3252;3417;3429;3825;3921;4597;4817;6057;6173;6181	19	142
sp|P06756|ITAV_HUMAN	sp|P06756|ITAV_HUMAN	12	12	12	>sp|P06756|ITAV_HUMAN Integrin alpha-V OS=Homo sapiens OX=9606 GN=ITGAV PE=1 SV=2	1	12	12	12	12	12	12	16.3	16.3	16.3	116.04	1048	1048	0	77.093	16.3	40528000	40528000	40528000	16	16				46	91;539;542;623;997;1086;1363;1516;1639;1695;2000;2365	True;True;True;True;True;True;True;True;True;True;True;True	93;560;563;646;1032;1126;1414;1575;1706;1766;2089;2471	122;740;744;845;1348;1464;1921;2154;2321;2390;2780;2781;3311	196;1330;1336;1337;1488;2297;2521;2522;2523;3526;3934;4203;4300;4934;4935;5892;5893	196;1330;1337;1488;2297;2522;3526;3934;4203;4300;4935;5893
sp|P07195|LDHB_HUMAN	sp|P07195|LDHB_HUMAN	6	6	5	>sp|P07195|LDHB_HUMAN L-lactate dehydrogenase B chain OS=Homo sapiens OX=9606 GN=LDHB PE=1 SV=2	1	6	6	5	6	6	5	21.9	21.9	18.3	36.638	334	334	0	43.152	21.9	47714000	47714000	47714000	9	9				47	1066;1281;1293;1561;1862;2269	True;True;True;True;True;True	1105;1330;1344;1625;1949;2373	1435;1819;1835;2217;2607;3182	2459;3383;3384;3408;4022;4023;4652;4653;5681	2459;3384;3408;4022;4652;5681
sp|P07237|PDIA1_HUMAN	sp|P07237|PDIA1_HUMAN	15	15	15	>sp|P07237|PDIA1_HUMAN Protein disulfide-isomerase OS=Homo sapiens OX=9606 GN=P4HB PE=1 SV=3	1	15	15	15	15	15	15	38.2	38.2	38.2	57.116	508	508	0	124.8	38.2	67154000	67154000	61372000	26	26				48	398;876;945;1002;1168;1291;1292;1508;1587;1715;2075;2086;2103;2195;2500	True;True;True;True;True;True;True;True;True;True;True;True;True;True;True	412;905;978;1037;1212;1341;1342;1343;1566;1652;1791;2166;2178;2196;2295;2610	564;1164;1284;1353;1588;1832;1833;1834;2143;2256;2420;2421;2882;2883;2884;2901;2921;2922;3084;3485	1040;1996;2192;2303;2750;3403;3404;3405;3406;3407;3911;4084;4085;4358;4359;5121;5122;5123;5124;5125;5126;5127;5128;5148;5175;5176;5512;5513;6163;6164	1040;1996;2192;2303;2750;3406;3407;3911;4085;4358;5128;5148;5175;5513;6164	20;21	324;425
sp|P07355|ANXA2_HUMAN;sp|A6NMY6|AXA2L_HUMAN	sp|P07355|ANXA2_HUMAN;sp|A6NMY6|AXA2L_HUMAN	12;7	12;7	12;7	>sp|P07355|ANXA2_HUMAN Annexin A2 OS=Homo sapiens OX=9606 GN=ANXA2 PE=1 SV=2;>sp|A6NMY6|AXA2L_HUMAN Putative annexin A2-like protein OS=Homo sapiens OX=9606 GN=ANXA2P2 PE=5 SV=2	2	12	12	12	12	12	12	34.8	34.8	34.8	38.604	339	339;339	0	106.99	34.8	141520000	141520000	141520000	18	18				49	45;294;295;823;1431;1706;1819;1869;2099;2119;2120;2413	True;True;True;True;True;True;True;True;True;True;True;True	46;303;304;850;1486;1779;1780;1905;1956;2192;2214;2215;2521	60;377;378;1086;1087;2027;2028;2403;2404;2550;2616;2917;2942;2943;3379	100;101;102;636;637;1872;1873;3716;3717;3718;3719;4321;4322;4566;4567;4568;4670;5171;5205;5206;6002;6003	101;636;637;1873;3716;4322;4568;4670;5171;5205;5206;6002
sp|P07437|TBB5_HUMAN	sp|P07437|TBB5_HUMAN	18	4	3	>sp|P07437|TBB5_HUMAN Tubulin beta chain OS=Homo sapiens OX=9606 GN=TUBB PE=1 SV=2	1	18	4	3	18	4	3	50.2	15.5	12.2	49.67	444	444	0	52.172	50.2	109680000	109680000	109680000	8	8				50	103;142;572;644;675;741;742;1018;1046;1051;1059;1131;1211;1276;1663;1908;2039;2486	True;True;False;False;True;False;False;False;False;False;True;False;False;False;False;False;False;False	105;147;593;594;668;702;768;769;1056;1085;1090;1098;1173;1255;1256;1324;1325;1731;1995;2128;2595	137;187;785;786;873;911;989;990;991;1376;1411;1417;1418;1427;1524;1642;1643;1810;1811;1812;1813;2348;2664;2835;3467	228;229;313;314;315;316;1395;1396;1397;1536;1599;1716;1717;1718;1719;1720;1721;1722;1723;2343;2344;2414;2415;2426;2427;2428;2447;2632;2633;2833;2834;2835;3368;3369;3370;3371;3372;3373;3374;4245;4246;4247;4753;4754;4755;4756;4757;4758;5035;6132;6133;6134	229;316;1397;1536;1599;1719;1723;2344;2415;2427;2447;2633;2835;3369;4247;4756;5035;6133	22;23;24;25	164;257;267;330
sp|P07737|PROF1_HUMAN	sp|P07737|PROF1_HUMAN	5	5	4	>sp|P07737|PROF1_HUMAN Profilin-1 OS=Homo sapiens OX=9606 GN=PFN1 PE=1 SV=2	1	5	5	4	5	5	4	37.9	37.9	29.3	15.054	140	140	0	40.238	37.9	43239000	43239000	43239000	8	8				51	365;475;476;1987;2068	True;True;True;True;True	378;491;492;2076;2159	518;659;660;2765;2874	967;968;1196;1197;4910;4911;5110;5111	967;1196;1197;4911;5111
sp|P07900|HS90A_HUMAN;sp|Q14568|HS902_HUMAN;sp|Q58FG0|HS905_HUMAN	sp|P07900|HS90A_HUMAN	20;3;2	13;1;2	13;1;2	>sp|P07900|HS90A_HUMAN Heat shock protein HSP 90-alpha OS=Homo sapiens OX=9606 GN=HSP90AA1 PE=1 SV=5	3	20	13	13	20	13	13	34.6	24.7	24.7	84.659	732	732;343;334	0	176.38	34.6	64809000	64809000	64809000	18	18				52	34;132;335;346;438;520;831;858;864;868;886;1265;1641;1823;1956;2049;2231;2447;2448;2470	False;True;True;True;False;True;False;True;True;True;True;True;True;True;False;True;True;False;False;False	34;136;345;359;454;539;858;887;893;897;917;1313;1708;1909;2043;2138;2335;2556;2557;2579	48;173;432;489;616;716;1097;1136;1147;1152;1205;1796;2323;2554;2724;2725;2845;3135;3422;3423;3451	85;86;87;286;739;909;1121;1122;1291;1887;1888;1955;1956;1970;1978;2049;3349;4205;4206;4572;4573;4848;4849;4850;5056;5057;5597;5598;6073;6074;6075;6111;6112	86;286;739;909;1122;1291;1887;1956;1970;1978;2049;3349;4206;4573;4849;5056;5598;6073;6074;6112
sp|P07910|HNRPC_HUMAN;sp|P0DMR1|HNRC4_HUMAN;sp|O60812|HNRC1_HUMAN;sp|B7ZW38|HNRC3_HUMAN;sp|B2RXH8|HNRC2_HUMAN;sp|Q86SE5|RALYL_HUMAN	sp|P07910|HNRPC_HUMAN	8;3;3;3;3;1	8;3;3;3;3;1	8;3;3;3;3;1	>sp|P07910|HNRPC_HUMAN Heterogeneous nuclear ribonucleoproteins C1/C2 OS=Homo sapiens OX=9606 GN=HNRNPC PE=1 SV=4	6	8	8	8	8	8	8	29.1	29.1	29.1	33.67	306	306;293;293;293;293;291	0	54.938	29.1	61634000	61634000	52526000	12	12				53	715;1072;1164;1302;1524;1750;2230;2353	True;True;True;True;True;True;True;True	742;1111;1208;1353;1583;1829;2334;2459	958;1441;1442;1582;1847;1848;2162;2468;3133;3134;3293;3294	1672;1673;2471;2472;2740;3424;3425;3944;4432;4433;5594;5595;5596;5862;5863	1672;2472;2740;3424;3944;4432;5595;5862
sp|P08195|4F2_HUMAN	sp|P08195|4F2_HUMAN	7	7	7	>sp|P08195|4F2_HUMAN 4F2 cell-surface antigen heavy chain OS=Homo sapiens OX=9606 GN=SLC3A2 PE=1 SV=3	1	7	7	7	7	7	7	13	13	13	67.993	630	630	0	50.046	13	23711000	23711000	23711000	8	8				54	803;958;996;1305;1346;2176;2274	True;True;True;True;True;True;True	830;991;1031;1356;1397;2275;2379	1063;1298;1347;1853;1902;3026;3193	1836;1837;2215;2296;3431;3501;5365;5703	1836;2215;2296;3431;3501;5365;5703
sp|P08238|HS90B_HUMAN;sp|Q58FF7|H90B3_HUMAN;sp|Q58FF6|H90B4_HUMAN	sp|P08238|HS90B_HUMAN	22;7;2	21;7;2	13;4;0	>sp|P08238|HS90B_HUMAN Heat shock protein HSP 90-beta OS=Homo sapiens OX=9606 GN=HSP90AB1 PE=1 SV=4	3	22	21	13	22	21	13	37.7	36	24.7	83.263	724	724;597;505	0	257.49	37.7	266520000	266520000	263680000	43	43				55	28;34;336;347;438;519;551;718;831;867;926;1119;1266;1486;1642;1822;1927;1956;2447;2448;2465;2470	True;True;True;True;True;False;True;True;True;True;True;True;True;True;True;True;True;True;True;True;True;True	28;34;346;360;454;538;572;745;858;896;959;1161;1314;1542;1709;1908;2014;2043;2556;2557;2574;2579	41;42;48;433;434;490;616;715;755;962;963;1097;1150;1151;1264;1508;1797;2119;2324;2553;2686;2724;2725;3422;3423;3444;3451	74;75;85;86;87;740;741;742;910;1121;1122;1289;1290;1351;1677;1678;1679;1887;1888;1974;1975;1976;1977;2159;2602;3350;3870;3871;3872;4207;4208;4209;4571;4793;4794;4795;4848;4849;4850;6073;6074;6075;6103;6111;6112	74;86;741;910;1122;1289;1351;1679;1887;1976;2159;2602;3350;3872;4209;4571;4793;4849;6073;6074;6103;6112
sp|P08670|VIME_HUMAN;sp|P17661|DESM_HUMAN;sp|P14136|GFAP_HUMAN;sp|P41219|PERI_HUMAN;sp|O43790|KRT86_HUMAN;sp|P78385|KRT83_HUMAN;sp|Q16352|AINX_HUMAN;sp|Q14533|KRT81_HUMAN;sp|P78386|KRT85_HUMAN;sp|P07196|NFL_HUMAN;sp|P07197|NFM_HUMAN	sp|P08670|VIME_HUMAN	25;3;1;1;1;1;1;1;1;1;1	25;3;1;1;1;1;1;1;1;1;1	22;1;0;0;0;0;0;0;0;0;0	>sp|P08670|VIME_HUMAN Vimentin OS=Homo sapiens OX=9606 GN=VIM PE=1 SV=4	11	25	25	22	25	25	22	56.9	56.9	51.7	53.651	466	466;470;432;470;486;493;499;505;507;543;916	0	323.31	56.9	456400000	456400000	440800000	44	44				56	283;344;443;501;534;565;584;588;629;1008;1009;1056;1179;1258;1323;1389;1392;1514;1804;1810;1852;1957;2017;2169;2218	True;True;True;True;True;True;True;True;True;True;True;True;True;True;True;True;True;True;True;True;True;True;True;True;True	292;357;459;519;555;586;606;610;653;1043;1044;1095;1223;1305;1306;1374;1442;1445;1573;1889;1896;1939;2044;2106;2268;2321	363;364;487;623;694;734;735;772;773;800;805;854;855;1360;1361;1362;1423;1603;1785;1786;1875;1876;1950;1953;2152;2533;2540;2541;2595;2726;2805;3016;3017;3116	615;616;617;618;907;1130;1131;1250;1318;1319;1320;1321;1376;1377;1420;1426;1427;1504;1505;2313;2314;2315;2316;2438;2439;2440;2769;2770;2771;3329;3330;3331;3460;3461;3578;3581;3931;3932;4540;4541;4542;4554;4555;4635;4851;4973;5351;5352;5353;5564;5565	615;907;1131;1250;1318;1376;1420;1427;1505;2314;2316;2440;2769;3331;3461;3578;3581;3932;4542;4554;4635;4851;4973;5352;5564	26	154
sp|P08865|RSSA_HUMAN	sp|P08865|RSSA_HUMAN	5	5	5	>sp|P08865|RSSA_HUMAN 40S ribosomal protein SA OS=Homo sapiens OX=9606 GN=RPSA PE=1 SV=4	1	5	5	5	5	5	5	25.8	25.8	25.8	32.854	295	295	0	39.636	25.8	24377000	24377000	24377000	11	11				57	29;107;586;1351;2516	True;True;True;True;True	29;109;608;1402;2626	43;142;802;1907;3505	76;77;78;79;80;234;235;1422;1423;3509;6194	78;235;1422;3509;6194
sp|P09211|GSTP1_HUMAN	sp|P09211|GSTP1_HUMAN	5	5	5	>sp|P09211|GSTP1_HUMAN Glutathione S-transferase P OS=Homo sapiens OX=9606 GN=GSTP1 PE=1 SV=2	1	5	5	5	5	5	5	31.4	31.4	31.4	23.356	210	210	0	49.68	31.4	39086000	39086000	39086000	6	6				58	67;180;647;1540;1686	True;True;True;True;True	68;185;671;1601;1756	85;230;878;2187;2377	137;382;383;1542;3973;4285	137;383;1542;3973;4285
sp|P09382|LEG1_HUMAN	sp|P09382|LEG1_HUMAN	6	6	6	>sp|P09382|LEG1_HUMAN Galectin-1 OS=Homo sapiens OX=9606 GN=LGALS1 PE=1 SV=2	1	6	6	6	6	6	6	47.4	47.4	47.4	14.716	135	135	0	71.084	47.4	200930000	200930000	174410000	25	25				59	279;363;1367;1372;1896;2364	True;True;True;True;True;True	288;376;1418;1419;1424;1983;2470	358;359;515;516;1925;1926;1932;2651;2652;3307;3308;3309;3310	606;607;956;957;958;959;960;961;962;963;964;3533;3534;3535;3536;3537;3538;3545;4721;4722;4723;5888;5889;5890;5891	607;959;3538;3545;4722;5890	27	121
sp|P09493|TPM1_HUMAN	sp|P09493|TPM1_HUMAN	27	27	11	>sp|P09493|TPM1_HUMAN Tropomyosin alpha-1 chain OS=Homo sapiens OX=9606 GN=TPM1 PE=1 SV=2	1	27	27	11	27	27	11	53.5	53.5	21.1	32.708	284	284	0	323.31	53.5	1924400000	1924400000	1577200000	99	99				60	106;198;199;439;813;814;860;861;1041;1095;1096;1141;1187;1220;1297;1303;1470;1755;1756;1835;1919;1931;1932;1936;2439;2505;2508	True;True;True;True;True;True;True;True;True;True;True;True;True;True;True;True;True;True;True;True;True;True;True;True;True;True;True	108;203;204;455;840;841;889;890;1080;1135;1136;1183;1231;1266;1348;1354;1526;1834;1835;1836;1837;1922;2006;2018;2019;2023;2548;2615;2618	141;251;252;253;254;617;618;1075;1076;1138;1139;1140;1141;1142;1143;1144;1404;1405;1406;1475;1476;1477;1537;1538;1539;1540;1541;1542;1543;1544;1545;1546;1547;1613;1614;1615;1741;1742;1743;1840;1841;1849;1850;1851;2099;2473;2474;2475;2476;2477;2478;2572;2573;2678;2690;2691;2692;2693;2694;2699;2700;3410;3411;3412;3492;3493;3496	233;421;422;423;424;425;426;427;428;1123;1124;1855;1856;1857;1858;1958;1959;1960;1961;1962;1963;1964;1965;1966;2398;2399;2400;2401;2402;2403;2404;2405;2406;2540;2541;2542;2543;2544;2545;2656;2657;2658;2659;2660;2661;2662;2663;2664;2665;2666;2667;2668;2669;2670;2671;2672;2673;2674;2675;2786;2787;2788;3250;3251;3252;3253;3417;3418;3426;3427;3428;3429;3826;3827;3828;3829;3830;3831;4439;4440;4441;444…	233;422;428;1123;1856;1858;1960;1966;2399;2541;2545;2657;2787;3252;3417;3429;3827;4440;4448;4597;4783;4801;4807;4817;6057;6173;6182
sp|P09622|DLDH_HUMAN	sp|P09622|DLDH_HUMAN	5	5	5	>sp|P09622|DLDH_HUMAN Dihydrolipoyl dehydrogenase, mitochondrial OS=Homo sapiens OX=9606 GN=DLD PE=1 SV=2	1	5	5	5	5	5	5	14.9	14.9	14.9	54.177	509	509	0	34.29	14.9	10628000	10628000	10628000	6	6				61	1032;1585;1616;1883;2193	True;True;True;True;True	1070;1650;1681;1970;2293	1391;2254;2291;2631;3082	2371;4081;4082;4152;4691;4692;5510	2371;4081;4152;4692;5510
sp|P09651|ROA1_HUMAN;sp|Q32P51|RA1L2_HUMAN	sp|P09651|ROA1_HUMAN;sp|Q32P51|RA1L2_HUMAN	8;5	7;4	7;4	>sp|P09651|ROA1_HUMAN Heterogeneous nuclear ribonucleoprotein A1 OS=Homo sapiens OX=9606 GN=HNRNPA1 PE=1 SV=5;>sp|Q32P51|RA1L2_HUMAN Heterogeneous nuclear ribonucleoprotein A1-like 2 OS=Homo sapiens OX=9606 GN=HNRNPA1L2 PE=2 SV=2	2	8	7	7	8	7	7	25.3	22.8	22.8	38.746	372	372;320	0	66.478	25.3	88751000	88751000	85823000	13	13				62	390;440;441;716;940;1891;1989;2466	True;True;False;True;True;True;True;True	404;456;457;743;973;1978;2078;2575	556;619;620;621;959;960;1278;2645;2646;2767;2768;3445	1022;1125;1126;1127;1674;1675;2184;2185;2186;4712;4713;4914;4915;6104	1022;1125;1127;1674;2185;4713;4914;6104
sp|P09936|UCHL1_HUMAN	sp|P09936|UCHL1_HUMAN	5	5	5	>sp|P09936|UCHL1_HUMAN Ubiquitin carboxyl-terminal hydrolase isozyme L1 OS=Homo sapiens OX=9606 GN=UCHL1 PE=1 SV=2	1	5	5	5	5	5	5	35	35	35	24.824	223	223	0	47.398	35	17014000	17014000	17014000	6	6				63	654;1545;1580;1732;1798	True;True;True;True;True	680;1608;1645;1811;1883	888;2194;2247;2248;2447;2527	1563;3980;4072;4073;4074;4075;4395;4532	1563;3980;4075;4395;4532
sp|Q71UI9|H2AV_HUMAN;sp|P0C0S5|H2AZ_HUMAN	sp|Q71UI9|H2AV_HUMAN;sp|P0C0S5|H2AZ_HUMAN	4;4	4;4	3;3	>sp|Q71UI9|H2AV_HUMAN Histone H2A.V OS=Homo sapiens OX=9606 GN=H2AFV PE=1 SV=3;>sp|P0C0S5|H2AZ_HUMAN Histone H2A.Z OS=Homo sapiens OX=9606 GN=H2AFZ PE=1 SV=2	2	4	4	3	4	4	3	46.9	46.9	41.4	13.509	128	128;128	0	27.211	46.9	89071000	89071000	89071000	9	9				64	201;701;872;2237	True;True;True;True	206;728;901;2341	257;939;1158;1159;1160;3142	433;1646;1647;1986;1987;1988;1989;1990;5608	433;1646;1990;5608
sp|P0DMV9|HS71B_HUMAN;sp|P0DMV8|HS71A_HUMAN	sp|P0DMV9|HS71B_HUMAN;sp|P0DMV8|HS71A_HUMAN	21;21	21;21	13;13	>sp|P0DMV9|HS71B_HUMAN Heat shock 70 kDa protein 1B OS=Homo sapiens OX=9606 GN=HSPA1B PE=1 SV=1;>sp|P0DMV8|HS71A_HUMAN Heat shock 70 kDa protein 1A OS=Homo sapiens OX=9606 GN=HSPA1A PE=1 SV=1	2	21	21	13	21	21	13	48.8	48.8	33.1	70.051	641	641;641	0	174.59	48.8	201120000	201120000	198650000	38	38				65	73;170;195;243;482;515;605;614;737;902;983;1109;1338;1476;1569;1652;1871;1889;2115;2150;2472	True;True;True;True;True;True;True;True;True;True;True;True;True;True;True;True;True;True;True;True;True	75;175;200;252;498;534;627;636;637;764;934;1017;1151;1389;1532;1633;1719;1958;1976;2209;2246;2581	94;220;247;248;312;666;710;824;835;836;985;1232;1330;1331;1497;1892;2106;2228;2335;2618;2641;2935;2989;3453	155;156;370;412;413;533;534;1207;1208;1282;1283;1457;1473;1474;1708;1709;2093;2269;2270;2271;2272;2273;2587;2588;3487;3488;3846;4045;4046;4047;4223;4224;4672;4705;4706;4707;5193;5303;6114	156;370;413;534;1208;1283;1457;1474;1709;2093;2269;2587;3488;3846;4047;4223;4672;4705;5193;5303;6114	28	87
sp|P0DP25|CALM3_HUMAN;sp|P0DP24|CALM2_HUMAN;sp|P0DP23|CALM1_HUMAN;sp|P27482|CALL3_HUMAN;sp|P02585|TNNC2_HUMAN	sp|P0DP25|CALM3_HUMAN;sp|P0DP24|CALM2_HUMAN;sp|P0DP23|CALM1_HUMAN	12;12;12;2;1	12;12;12;2;1	12;12;12;2;1	>sp|P0DP25|CALM3_HUMAN Calmodulin-3 OS=Homo sapiens OX=9606 GN=CALM3 PE=1 SV=1;>sp|P0DP24|CALM2_HUMAN Calmodulin-2 OS=Homo sapiens OX=9606 GN=CALM2 PE=1 SV=1;>sp|P0DP23|CALM1_HUMAN Calmodulin-1 OS=Homo sapiens OX=9606 GN=CALM1 PE=1 SV=1	5	12	12	12	12	12	12	63.1	63.1	63.1	16.837	149	149;149;149;149;160	0	323.31	63.1	640590000	640590000	620260000	41	41				66	276;282;370;399;407;408;518;896;1147;1445;1529;2227	True;True;True;True;True;True;True;True;True;True;True;True	285;291;384;413;414;423;424;537;927;1190;1500;1589;2331	351;352;362;534;535;565;566;567;568;579;580;581;714;1224;1556;1557;1558;2066;2168;2169;2170;2171;2172;2173;2174;3129;3130	591;592;593;594;612;613;614;988;989;990;991;1041;1042;1043;1044;1045;1046;1061;1062;1063;1064;1288;2078;2690;2691;2692;2693;3772;3952;3953;3954;3955;3956;3957;3958;3959;5585;5586;5587;5588;5589;5590;5591	593;613;989;1046;1061;1062;1288;2078;2692;3772;3958;5590	29	145
sp|P10599|THIO_HUMAN	sp|P10599|THIO_HUMAN	5	5	5	>sp|P10599|THIO_HUMAN Thioredoxin OS=Homo sapiens OX=9606 GN=TXN PE=1 SV=3	1	5	5	5	5	5	5	42.9	42.9	42.9	11.737	105	105	0	31.008	42.9	21441000	21441000	21441000	7	7				67	500;1227;1526;2027;2240	True;True;True;True;True	518;1273;1585;2116;2344	693;1750;2164;2818;3145	1249;3268;3946;4994;4995;4996;5611	1249;3268;3946;4996;5611
sp|P10809|CH60_HUMAN	sp|P10809|CH60_HUMAN	27	27	27	>sp|P10809|CH60_HUMAN 60 kDa heat shock protein, mitochondrial OS=Homo sapiens OX=9606 GN=HSPD1 PE=1 SV=2	1	27	27	27	27	27	27	57.2	57.2	57.2	61.054	573	573	0	323.31	57.2	749040000	749040000	676710000	100	100				68	17;133;158;159;692;827;966;1020;1026;1040;1058;1125;1423;1480;1567;1793;1833;2030;2031;2106;2110;2155;2242;2244;2245;2247;2380	True;True;True;True;True;True;True;True;True;True;True;True;True;True;True;True;True;True;True;True;True;True;True;True;True;True;True	17;137;138;163;164;719;854;999;1058;1064;1079;1097;1167;1478;1536;1631;1878;1920;2119;2120;2199;2203;2204;2251;2346;2348;2349;2351;2486	22;23;24;25;174;175;176;177;204;205;930;1093;1308;1378;1379;1385;1402;1403;1425;1426;1516;2019;2111;2112;2226;2522;2569;2570;2821;2822;2823;2824;2825;2925;2929;2930;2994;3147;3149;3150;3151;3152;3153;3156;3333;3334	42;43;44;45;46;47;287;288;289;290;291;292;293;294;295;296;297;298;299;344;345;1632;1633;1880;2231;2349;2350;2351;2352;2359;2393;2394;2395;2396;2397;2442;2443;2444;2445;2446;2615;2616;2617;3704;3854;3855;3856;3857;3858;4040;4041;4042;4043;4519;4520;4521;4522;4523;4524;4525;4593;4594;4595;4999;5000;5001;5002;5003;5004;5005;5006;5007;5008;5009;5010;5011;5012;5013;5014;5015;5016;5017;5018;5019;5020;5…	43;299;344;345;1633;1880;2231;2350;2359;2393;2446;2616;3704;3858;4042;4523;4595;5006;5020;5180;5187;5316;5618;5622;5625;5632;5929	30;31;32	40;55;217
sp|P10909|CLUS_HUMAN	sp|P10909|CLUS_HUMAN	6	6	6	>sp|P10909|CLUS_HUMAN Clusterin OS=Homo sapiens OX=9606 GN=CLU PE=1 SV=1	1	6	6	6	6	6	6	20.9	20.9	20.9	52.494	449	449	0	46.528	20.9	51715000	51715000	51715000	11	11				69	190;488;509;1248;1781;2391	True;True;True;True;True;True	195;504;527;1295;1865;2497	241;672;703;1774;2508;3349	405;1217;1218;1263;1264;1265;3310;3311;3312;4496;4497;5954;5955	405;1217;1263;3312;4496;5954
sp|P11021|BIP_HUMAN	sp|P11021|BIP_HUMAN	25	25	24	>sp|P11021|BIP_HUMAN Endoplasmic reticulum chaperone BiP OS=Homo sapiens OX=9606 GN=HSPA5 PE=1 SV=2	1	25	25	24	25	25	24	45	45	45	72.332	654	654	0	323.31	45	464670000	464670000	444490000	66	66				70	108;137;242;341;462;606;941;980;982;1061;1063;1128;1162;1182;1495;1583;1651;1978;2060;2101;2167;2297;2324;2385;2406	True;True;True;True;True;True;True;True;True;True;True;True;True;True;True;True;True;True;True;True;True;True;True;True;True	110;142;251;354;478;628;974;1014;1016;1100;1102;1170;1206;1226;1551;1648;1718;2066;2151;2194;2266;2403;2430;2491;2514	143;144;181;311;483;484;645;646;825;1279;1280;1325;1326;1328;1329;1429;1431;1432;1519;1579;1580;1608;2128;2252;2334;2751;2863;2919;3014;3225;3226;3256;3341;3342;3369;3370	236;237;238;239;304;305;531;532;900;901;1175;1176;1458;1459;2187;2188;2257;2258;2259;2260;2262;2263;2264;2265;2266;2267;2268;2449;2450;2453;2454;2455;2456;2621;2622;2734;2735;2781;3886;3887;3888;3889;3890;3891;3892;3893;4079;4221;4222;4893;4894;4895;5088;5089;5173;5348;5349;5766;5767;5809;5938;5939;5940;5941;5942;5987;5988	237;304;532;900;1175;1458;2187;2258;2268;2450;2454;2622;2734;2781;3888;4079;4222;4895;5089;5173;5349;5767;5809;5942;5988
sp|P11047|LAMC1_HUMAN	sp|P11047|LAMC1_HUMAN	4	4	4	>sp|P11047|LAMC1_HUMAN Laminin subunit gamma-1 OS=Homo sapiens OX=9606 GN=LAMC1 PE=1 SV=3	1	4	4	4	4	4	4	4.4	4.4	4.4	177.6	1609	1609	0	34.002	4.4	8356800	8356800	8356800	8	8				71	425;1270;1369;1668	True;True;True;True	441;1318;1421;1738	599;1802;1928;2357	1094;1095;3355;3356;3357;3358;3540;4258	1094;3357;3540;4258
sp|P11142|HSP7C_HUMAN;sp|P54652|HSP72_HUMAN	sp|P11142|HSP7C_HUMAN	18;5	16;3	16;3	>sp|P11142|HSP7C_HUMAN Heat shock cognate 71 kDa protein OS=Homo sapiens OX=9606 GN=HSPA8 PE=1 SV=1	2	18	16	16	18	16	16	34.2	32.2	32.2	70.897	646	646;639	0	196.89	34.2	221610000	221610000	207090000	38	38				72	177;241;597;901;980;981;1429;1530;1557;1653;1657;1800;1828;1897;1979;1997;2150;2165	True;True;True;True;False;True;True;True;True;True;True;True;True;True;True;True;False;True	182;250;619;932;933;1014;1015;1484;1590;1621;1720;1721;1725;1885;1914;1915;1984;1985;2067;2086;2246;2264	227;310;815;1230;1231;1325;1326;1327;2025;2175;2212;2213;2336;2337;2341;2529;2561;2562;2653;2654;2752;2776;2777;2989;3010;3011	379;529;530;1445;2087;2088;2089;2090;2091;2092;2257;2258;2259;2260;2261;3713;3960;4016;4017;4018;4225;4226;4227;4228;4229;4230;4231;4232;4236;4237;4534;4535;4582;4583;4724;4725;4726;4727;4896;4927;4928;5303;5342;5343;5344	379;530;1445;2091;2258;2261;3713;3960;4016;4232;4237;4534;4583;4727;4896;4927;5303;5344	33;34;35;36	61;87;93;122
sp|P11940|PABP1_HUMAN;sp|Q9H361|PABP3_HUMAN;sp|Q4VXU2|PAP1L_HUMAN;sp|Q13310|PABP4_HUMAN;sp|Q5JQF8|PAP1M_HUMAN	sp|P11940|PABP1_HUMAN;sp|Q9H361|PABP3_HUMAN	10;7;3;3;1	10;7;3;3;1	10;7;3;3;1	>sp|P11940|PABP1_HUMAN Polyadenylate-binding protein 1 OS=Homo sapiens OX=9606 GN=PABPC1 PE=1 SV=2;>sp|Q9H361|PABP3_HUMAN Polyadenylate-binding protein 3 OS=Homo sapiens OX=9606 GN=PABPC3 PE=1 SV=2	5	10	10	10	10	10	10	19.5	19.5	19.5	70.67	636	636;631;614;644;200	0	67.823	19.5	48654000	48654000	45883000	12	12				73	116;222;657;722;1068;1107;1254;1613;1696;1933	True;True;True;True;True;True;True;True;True;True	118;229;683;749;1107;1149;1301;1678;1767;2020	152;284;285;891;967;1437;1495;1781;2288;2391;2695	254;255;484;485;1567;1684;2465;2466;2579;3323;4147;4301;4302;4303;4809	255;484;1567;1684;2465;2579;3323;4147;4301;4809	37	573
sp|P12814|ACTN1_HUMAN;sp|P35609|ACTN2_HUMAN;sp|Q08043|ACTN3_HUMAN	sp|P12814|ACTN1_HUMAN	16;2;2	16;2;2	11;1;1	>sp|P12814|ACTN1_HUMAN Alpha-actinin-1 OS=Homo sapiens OX=9606 GN=ACTN1 PE=1 SV=2	3	16	16	11	16	16	11	26	26	19.8	103.06	892	892;894;901	0	152.39	26	90822000	90822000	90822000	19	19				74	15;183;185;319;919;1205;1326;1435;1535;1558;1713;1736;1826;2095;2255;2291	True;True;True;True;True;True;True;True;True;True;True;True;True;True;True;True	15;188;190;328;952;1249;1377;1490;1596;1622;1789;1815;1912;2188;2359;2396	19;233;236;412;1257;1635;1879;2032;2182;2214;2418;2451;2557;2558;2559;2912;3167;3215	36;387;394;705;2151;2820;2821;3465;3726;3727;3967;4019;4355;4403;4577;4578;4579;4580;5166;5659;5742	36;387;394;705;2151;2821;3465;3726;3967;4019;4355;4403;4577;5166;5659;5742
sp|P12956|XRCC6_HUMAN	sp|P12956|XRCC6_HUMAN	4	4	4	>sp|P12956|XRCC6_HUMAN X-ray repair cross-complementing protein 6 OS=Homo sapiens OX=9606 GN=XRCC6 PE=1 SV=2	1	4	4	4	4	4	4	9.4	9.4	9.4	69.842	609	609	0	29.912	9.4	8944200	8944200	8944200	6	6				75	530;1003;1614;1880	True;True;True;True	549;1038;1679;1967	727;1354;2289;2628	1307;2304;4148;4149;4685;4686	1307;2304;4149;4686
sp|P13010|XRCC5_HUMAN	sp|P13010|XRCC5_HUMAN	5	5	5	>sp|P13010|XRCC5_HUMAN X-ray repair cross-complementing protein 5 OS=Homo sapiens OX=9606 GN=XRCC5 PE=1 SV=3	1	5	5	5	5	5	5	16.8	16.8	16.8	82.704	732	732	0	43.985	16.8	11696000	11696000	11696000	8	8				76	182;255;1043;1763;2429	True;True;True;True;True	187;264;1082;1846;2538	232;326;1408;2489;3399	385;386;552;553;554;555;2408;4469;4470;6035	385;554;2408;4469;6035
sp|P13073|COX41_HUMAN	sp|P13073|COX41_HUMAN	5	5	5	>sp|P13073|COX41_HUMAN Cytochrome c oxidase subunit 4 isoform 1, mitochondrial OS=Homo sapiens OX=9606 GN=COX4I1 PE=1 SV=1	1	5	5	5	5	5	5	32	32	32	19.576	169	169	0	34.432	32	54847000	54847000	53236000	7	7				77	192;290;628;1881;2337	True;True;True;True;True	197;299;652;1968;2443	243;371;372;373;853;2629;3273	408;627;628;629;630;1503;4687;5835	408;628;1503;4687;5835
sp|P13639|EF2_HUMAN	sp|P13639|EF2_HUMAN	14	14	14	>sp|P13639|EF2_HUMAN Elongation factor 2 OS=Homo sapiens OX=9606 GN=EEF2 PE=1 SV=4	1	14	14	14	14	14	14	24.1	24.1	24.1	95.337	858	858	0	95.295	24.1	53484000	53484000	50328000	22	22				78	178;314;466;468;566;662;1080;1354;1998;2080;2225;2331;2415;2449	True;True;True;True;True;True;True;True;True;True;True;True;True;True	183;323;482;484;587;688;1120;1405;2087;2171;2329;2437;2523;2558	228;399;650;652;774;775;776;897;1453;1910;1911;2778;2889;3127;3265;3381;3424	380;668;669;1180;1183;1378;1379;1380;1575;2490;3512;3513;3514;4929;4930;4931;5134;5583;5821;6005;6076;6077	380;668;1180;1183;1380;1575;2490;3512;4930;5134;5583;5821;6005;6076
sp|P13667|PDIA4_HUMAN	sp|P13667|PDIA4_HUMAN	9	9	9	>sp|P13667|PDIA4_HUMAN Protein disulfide-isomerase A4 OS=Homo sapiens OX=9606 GN=PDIA4 PE=1 SV=2	1	9	9	9	9	9	9	18.3	18.3	18.3	72.932	645	645	0	101.94	18.3	23483000	23483000	23483000	13	13				79	537;580;602;712;1116;1829;2128;2425;2459	True;True;True;True;True;True;True;True;True	558;602;624;739;1158;1916;2223;2533;2568	738;796;821;955;1504;2563;2953;3393;3437	1324;1325;1408;1409;1453;1666;1667;2597;4584;4585;5223;6025;6094;6095	1324;1408;1453;1666;2597;4584;5223;6025;6095
sp|P13674|P4HA1_HUMAN	sp|P13674|P4HA1_HUMAN	5	5	5	>sp|P13674|P4HA1_HUMAN Prolyl 4-hydroxylase subunit alpha-1 OS=Homo sapiens OX=9606 GN=P4HA1 PE=1 SV=2	1	5	5	5	5	5	5	11.8	11.8	11.8	61.049	534	534	0	32.944	11.8	15769000	15769000	15769000	5	5				80	349;822;843;1390;1873	True;True;True;True;True	362;849;870;1443;1960	493;1085;1117;1951;2620	913;1871;1923;3579;4674;4675	913;1871;1923;3579;4674
sp|P14314|GLU2B_HUMAN	sp|P14314|GLU2B_HUMAN	4	4	4	>sp|P14314|GLU2B_HUMAN Glucosidase 2 subunit beta OS=Homo sapiens OX=9606 GN=PRKCSH PE=1 SV=2	1	4	4	4	4	4	4	10.2	10.2	10.2	59.425	528	528	0	33.962	10.2	21303000	21303000	21303000	8	8				81	174;564;1546;1938	True;True;True;True	179;585;1609;2025	224;771;2195;2196;2702	375;376;1375;3981;3982;3983;3984;4820	376;1375;3984;4820
sp|P14618|KPYM_HUMAN;sp|P30613|KPYR_HUMAN	sp|P14618|KPYM_HUMAN	20;1	20;1	20;1	>sp|P14618|KPYM_HUMAN Pyruvate kinase PKM OS=Homo sapiens OX=9606 GN=PKM PE=1 SV=4	2	20	20	20	20	20	20	47.1	47.1	47.1	57.936	531	531;574	0	209.26	47.1	190250000	190250000	188860000	44	44				82	50;82;181;352;624;681;703;745;828;936;1062;1093;1117;1201;1219;1362;1667;1739;2037;2330	True;True;True;True;True;True;True;True;True;True;True;True;True;True;True;True;True;True;True;True	51;84;186;365;647;648;708;730;772;855;969;1101;1133;1159;1245;1265;1413;1737;1818;2126;2436	66;67;111;112;231;496;846;847;848;918;941;995;1094;1274;1430;1472;1505;1506;1631;1740;1920;2356;2454;2832;3264	108;109;110;111;179;180;384;917;1489;1490;1491;1492;1493;1494;1495;1610;1611;1612;1613;1649;1728;1729;1730;1881;1882;2179;2451;2452;2534;2598;2599;2814;2815;2816;3248;3249;3524;3525;4256;4257;4408;5030;5031;5032;5820	110;180;384;917;1491;1612;1649;1729;1881;2179;2451;2534;2599;2816;3249;3524;4257;4408;5032;5820	38	239
sp|P14625|ENPL_HUMAN;sp|Q58FF3|ENPLL_HUMAN	sp|P14625|ENPL_HUMAN	25;2	25;2	24;2	>sp|P14625|ENPL_HUMAN Endoplasmin OS=Homo sapiens OX=9606 GN=HSP90B1 PE=1 SV=1	2	25	25	24	25	25	24	35.6	35.6	34.1	92.468	803	803;399	0	266.04	35.6	234680000	234680000	234190000	53	53				83	166;301;404;431;444;445;461;519;589;650;830;906;992;1083;1118;1274;1432;1620;1913;1922;2043;2058;2059;2156;2232	True;True;True;True;True;True;True;True;True;True;True;True;True;True;True;True;True;True;True;True;True;True;True;True;True	171;310;419;447;460;461;477;538;611;674;857;938;1027;1123;1160;1322;1487;1685;2000;2009;2132;2149;2150;2252;2336	215;216;384;573;607;624;625;644;715;806;881;1096;1236;1343;1461;1507;1808;2029;2295;2296;2672;2681;2839;2861;2862;2995;2996;3136	362;363;643;644;645;646;647;1053;1106;1107;1132;1133;1134;1173;1174;1289;1290;1428;1429;1430;1431;1432;1548;1549;1550;1885;1886;2097;2098;2099;2291;2517;2600;2601;3366;3720;3721;4157;4158;4159;4160;4776;4788;5045;5083;5084;5085;5086;5087;5317;5318;5319;5320;5599;5600	363;646;1053;1107;1132;1133;1174;1289;1430;1550;1886;2099;2291;2517;2601;3366;3721;4157;4776;4788;5045;5085;5087;5319;5599
sp|P14854|CX6B1_HUMAN	sp|P14854|CX6B1_HUMAN	5	5	5	>sp|P14854|CX6B1_HUMAN Cytochrome c oxidase subunit 6B1 OS=Homo sapiens OX=9606 GN=COX6B1 PE=1 SV=2	1	5	5	5	5	5	5	67.4	67.4	67.4	10.192	86	86	0	62.261	67.4	48244000	48244000	44285000	13	13				84	51;646;729;1575;2408	True;True;True;True;True	52;670;756;1640;2516	68;875;876;877;975;2237;2238;3372;3373	112;1539;1540;1541;1695;4061;4062;5990;5991;5992;5993;5994;5995	112;1541;1695;4061;5992
sp|P16070|CD44_HUMAN	sp|P16070|CD44_HUMAN	5	5	5	>sp|P16070|CD44_HUMAN CD44 antigen OS=Homo sapiens OX=9606 GN=CD44 PE=1 SV=3	1	5	5	5	5	5	5	8.1	8.1	8.1	81.537	742	742	0	59.153	8.1	33610000	33610000	33610000	11	11				85	560;590;1473;1976;2453	True;True;True;True;True	581;612;1529;2064;2562	767;807;2102;2749;3428;3429	1368;1369;1370;1371;1433;3838;3839;3840;4890;6083;6084	1370;1433;3840;4890;6084
sp|P16402|H13_HUMAN;sp|P16403|H12_HUMAN;sp|P10412|H14_HUMAN;sp|P22492|H1T_HUMAN;sp|Q02539|H11_HUMAN	sp|P16402|H13_HUMAN;sp|P16403|H12_HUMAN;sp|P10412|H14_HUMAN;sp|P22492|H1T_HUMAN;sp|Q02539|H11_HUMAN	6;5;5;3;3	6;5;5;3;3	5;4;4;2;2	>sp|P16402|H13_HUMAN Histone H1.3 OS=Homo sapiens OX=9606 GN=HIST1H1D PE=1 SV=2;>sp|P16403|H12_HUMAN Histone H1.2 OS=Homo sapiens OX=9606 GN=HIST1H1C PE=1 SV=2;>sp|P10412|H14_HUMAN Histone H1.4 OS=Homo sapiens OX=9606 GN=HIST1H1E PE=1 SV=2;>sp|P22492|H1T_H	5	6	6	5	6	6	5	23.5	23.5	19.5	22.35	221	221;213;219;207;215	0	45.824	23.5	53526000	53526000	50990000	14	14				86	112;815;1088;1094;1176;1912	True;True;True;True;True;True	114;842;1128;1134;1220;1999	148;1077;1078;1466;1473;1474;1600;2671	244;245;246;1859;1860;1861;2526;2535;2536;2537;2538;2539;2763;4775	245;1861;2526;2538;2763;4775
sp|P17844|DDX5_HUMAN	sp|P17844|DDX5_HUMAN	7	7	5	>sp|P17844|DDX5_HUMAN Probable ATP-dependent RNA helicase DDX5 OS=Homo sapiens OX=9606 GN=DDX5 PE=1 SV=1	1	7	7	5	7	7	5	12.2	12.2	8.5	69.147	614	614	0	45.022	12.2	29527000	29527000	29527000	10	10				87	160;1340;1353;1537;1594;1853;2079	True;True;True;True;True;True;True	165;1391;1404;1598;1659;1940;2170	206;1894;1909;2184;2264;2596;2888	346;347;3490;3511;3970;4099;4100;4101;4636;5133	346;3490;3511;3970;4100;4636;5133
sp|P18206|VINC_HUMAN	sp|P18206|VINC_HUMAN	6	6	6	>sp|P18206|VINC_HUMAN Vinculin OS=Homo sapiens OX=9606 GN=VCL PE=1 SV=4	1	6	6	6	6	6	6	8.2	8.2	8.2	123.8	1134	1134	0	38.472	8.2	10395000	10395000	10395000	9	9				88	105;113;175;521;748;1539	True;True;True;True;True;True	107;115;180;540;775;1600	139;140;149;225;717;998;999;2186	231;232;247;377;1292;1735;1736;1737;3972	231;247;377;1292;1737;3972
sp|P18669|PGAM1_HUMAN;sp|P15259|PGAM2_HUMAN;sp|Q8N0Y7|PGAM4_HUMAN	sp|P18669|PGAM1_HUMAN	8;2;2	8;2;2	8;2;2	>sp|P18669|PGAM1_HUMAN Phosphoglycerate mutase 1 OS=Homo sapiens OX=9606 GN=PGAM1 PE=1 SV=2	3	8	8	8	8	8	8	43.7	43.7	43.7	28.804	254	254;253;254	0	58.698	43.7	49020000	49020000	47866000	15	15				89	134;655;854;1619;2118;2303;2421;2422	True;True;True;True;True;True;True;True	139;681;883;1684;2212;2213;2409;2529;2530	178;889;1132;2294;2938;2939;2940;2941;3234;3388;3389	300;301;1564;1950;4156;5198;5199;5200;5201;5202;5203;5204;5778;6018;6019;6020	300;1564;1950;4156;5204;5778;6018;6020	39	77
sp|P19338|NUCL_HUMAN	sp|P19338|NUCL_HUMAN	11	11	11	>sp|P19338|NUCL_HUMAN Nucleolin OS=Homo sapiens OX=9606 GN=NCL PE=1 SV=3	1	11	11	11	11	11	11	14.1	14.1	14.1	76.613	710	710	0	69.732	14.1	40896000	40896000	39922000	17	17				90	122;418;419;420;574;723;771;802;1925;2189;2386	True;True;True;True;True;True;True;True;True;True;True	125;434;435;436;596;750;798;829;2012;2289;2492	160;591;592;593;788;968;1027;1061;1062;2684;3078;3343	263;1082;1083;1084;1085;1399;1685;1777;1778;1779;1780;1781;1834;1835;4791;5504;5505;5943	263;1082;1083;1084;1399;1685;1778;1835;4791;5504;5943
sp|P20674|COX5A_HUMAN	sp|P20674|COX5A_HUMAN	5	5	5	>sp|P20674|COX5A_HUMAN Cytochrome c oxidase subunit 5A, mitochondrial OS=Homo sapiens OX=9606 GN=COX5A PE=1 SV=2	1	5	5	5	5	5	5	47.3	47.3	47.3	16.762	150	150	0	62.347	47.3	56840000	56840000	56840000	7	7				91	493;749;1357;1841;2420	True;True;True;True;True	510;776;1408;1928;2528	683;1000;1914;2580;3387	1237;1738;3518;4610;4611;4612;6017	1237;1738;3518;4611;6017
sp|P20700|LMNB1_HUMAN	sp|P20700|LMNB1_HUMAN	4	4	4	>sp|P20700|LMNB1_HUMAN Lamin-B1 OS=Homo sapiens OX=9606 GN=LMNB1 PE=1 SV=2	1	4	4	4	4	4	4	13.7	13.7	13.7	66.408	586	586	0	40.156	13.7	12888000	12888000	12888000	6	6				92	233;1439;1939;2147	True;True;True;True	242;1494;2026;2243	300;2036;2703;2986	511;3732;4821;4822;4823;5297	511;3732;4822;5297
sp|P21333|FLNA_HUMAN	sp|P21333|FLNA_HUMAN	97	97	86	>sp|P21333|FLNA_HUMAN Filamin-A OS=Homo sapiens OX=9606 GN=FLNA PE=1 SV=4	1	97	97	86	97	97	86	54.2	54.2	51.5	280.74	2647	2647	0	323.31	54.2	1520500000	1520500000	1490000000	240	240				93	43;53;54;63;85;87;98;127;138;151;184;197;225;229;237;238;245;249;284;305;308;309;378;410;421;450;473;538;561;618;640;643;665;670;686;760;773;800;819;888;910;931;1030;1044;1075;1124;1224;1279;1280;1331;1381;1415;1436;1484;1498;1504;1577;1595;1771;1844;1864;1967;1968;1974;2066;2081;2082;2083;2121;2182;2184;2185;2201;2210;2219;2223;2250;2259;2260;2286;2340;2344;2357;2363;2373;2378;2392;2394;2395;241…	True;True;True;True;True;True;True;True;True;True;True;True;True;True;True;True;True;True;True;True;True;True;True;True;True;True;True;True;True;True;True;True;True;True;True;True;True;True;True;True;True;True;True;True;True;True;True;True;True;True;True;True;True;True;True;True;True;True;True;True;True;True;True;True;True;True;True;True;True;True;True;True;True;True;True;True;True;True;True;True…	44;54;55;64;87;89;100;131;143;156;189;202;232;236;237;246;247;254;258;293;314;317;318;392;426;437;466;489;559;582;641;664;667;692;697;713;787;800;827;846;919;942;964;1068;1083;1115;1166;1270;1328;1329;1382;1433;1470;1491;1540;1554;1562;1642;1660;1854;1931;1951;2055;2056;2062;2157;2172;2173;2174;2216;2282;2284;2285;2301;2311;2322;2327;2354;2363;2364;2391;2446;2450;2463;2469;2479;2484;2498;2500;250…	58;70;71;81;115;116;118;130;131;167;168;182;183;196;234;235;250;289;294;295;305;306;307;314;319;365;389;392;393;543;544;583;594;595;630;657;739;768;840;868;871;872;901;906;923;1013;1029;1030;1058;1059;1082;1207;1242;1269;1389;1409;1446;1515;1747;1817;1818;1884;1941;2009;2033;2117;2131;2139;2240;2241;2242;2265;2497;2585;2609;2610;2738;2739;2746;2747;2871;2872;2890;2891;2892;2893;2894;2944;3038;304…	98;114;115;116;117;130;131;132;183;184;185;186;187;189;211;212;213;214;215;216;217;274;275;276;277;306;307;308;329;388;389;390;391;392;393;417;418;419;420;490;491;496;497;498;519;520;521;522;523;524;536;541;619;620;654;659;660;661;1001;1002;1003;1004;1005;1067;1068;1069;1086;1087;1088;1089;1090;1142;1143;1144;1145;1146;1147;1148;1188;1189;1190;1191;1192;1326;1327;1328;1329;1372;1478;1479;1480;148…	98;114;117;132;187;189;216;275;307;329;391;420;490;498;520;522;536;541;619;654;659;661;1005;1069;1089;1144;1190;1327;1372;1478;1529;1534;1584;1593;1623;1756;1784;1831;1866;2052;2116;2171;2366;2409;2479;2614;3264;3381;3382;3471;3559;3689;3728;3866;3897;3907;4066;4102;4482;4618;4658;4871;4872;4884;5107;5137;5139;5140;5209;5389;5408;5409;5521;5538;5566;5579;5647;5667;5668;5732;5840;5846;5872;5887;59…	40;41;42	297;1842;2490
sp|P21796|VDAC1_HUMAN	sp|P21796|VDAC1_HUMAN	11	11	11	>sp|P21796|VDAC1_HUMAN Voltage-dependent anion-selective channel protein 1 OS=Homo sapiens OX=9606 GN=VDAC1 PE=1 SV=2	1	11	11	11	11	11	11	49.1	49.1	49.1	30.772	283	283	0	115.24	49.1	244880000	244880000	236610000	30	30				94	839;1137;1448;1449;1454;1888;2335;2382;2389;2417;2499	True;True;True;True;True;True;True;True;True;True;True	866;1179;1504;1505;1510;1975;2441;2488;2495;2525;2609	1108;1531;1532;2073;2074;2079;2080;2639;2640;3269;3270;3336;3337;3346;3384;3484	1904;2647;2648;3788;3789;3790;3799;3800;3801;3802;4701;4702;4703;4704;5825;5826;5827;5828;5933;5934;5948;5949;5950;5951;6010;6011;6012;6013;6161;6162	1904;2648;3788;3790;3801;4703;5825;5933;5950;6011;6162
sp|P22392|NDKB_HUMAN;sp|O60361|NDK8_HUMAN;sp|P15531|NDKA_HUMAN	sp|P22392|NDKB_HUMAN;sp|O60361|NDK8_HUMAN;sp|P15531|NDKA_HUMAN	6;5;3	6;5;3	6;5;3	>sp|P22392|NDKB_HUMAN Nucleoside diphosphate kinase B OS=Homo sapiens OX=9606 GN=NME2 PE=1 SV=1;>sp|O60361|NDK8_HUMAN Putative nucleoside diphosphate kinase OS=Homo sapiens OX=9606 GN=NME2P1 PE=5 SV=1;>sp|P15531|NDKA_HUMAN Nucleoside diphosphate kinase A O	3	6	6	6	6	6	6	42.8	42.8	42.8	17.298	152	152;137;152	0	39.361	42.8	41974000	41974000	41974000	9	9				95	360;702;1604;1728;2064;2325	True;True;True;True;True;True	373;729;1669;1806;2155;2431	512;940;2274;2441;2867;2868;3257;3258	949;1648;4112;4386;5097;5098;5810;5811;5812;5813	949;1648;4112;4386;5097;5810
sp|P22626|ROA2_HUMAN	sp|P22626|ROA2_HUMAN	11	11	10	>sp|P22626|ROA2_HUMAN Heterogeneous nuclear ribonucleoproteins A2/B1 OS=Homo sapiens OX=9606 GN=HNRNPA2B1 PE=1 SV=2	1	11	11	10	11	11	10	46.2	46.2	43.6	37.429	353	353	0	101.55	46.2	103120000	103120000	101540000	24	24				96	441;457;720;725;731;734;736;929;1253;1634;2464	True;True;True;True;True;True;True;True;True;True;True	457;473;747;752;758;761;763;962;1300;1701;2573	621;639;965;970;971;978;981;983;984;1267;1780;2315;2316;3442;3443	1127;1161;1162;1682;1688;1689;1690;1698;1699;1703;1705;1706;1707;2169;3321;3322;4193;4194;4195;4196;4197;4198;6101;6102	1127;1162;1682;1688;1699;1703;1706;2169;3322;4196;6102
sp|P22695|QCR2_HUMAN	sp|P22695|QCR2_HUMAN	6	6	6	>sp|P22695|QCR2_HUMAN Cytochrome b-c1 complex subunit 2, mitochondrial OS=Homo sapiens OX=9606 GN=UQCRC2 PE=1 SV=3	1	6	6	6	6	6	6	21	21	21	48.442	453	453	0	40.325	21	21787000	21787000	21787000	5	5				97	194;208;1378;1568;1801;2438	True;True;True;True;True;True	199;214;1430;1632;1886;2547	246;267;1938;2227;2530;3409	411;452;3554;3555;4044;4536;6055	411;452;3555;4044;4536;6055
sp|P23246|SFPQ_HUMAN	sp|P23246|SFPQ_HUMAN	9	9	9	>sp|P23246|SFPQ_HUMAN Splicing factor, proline- and glutamine-rich OS=Homo sapiens OX=9606 GN=SFPQ PE=1 SV=2	1	9	9	9	9	9	9	20.4	20.4	20.4	76.149	707	707	0	67.759	20.4	36441000	36441000	36441000	15	15				98	306;621;754;1255;1520;1628;1690;1787;1971	True;True;True;True;True;True;True;True;True	315;644;781;1302;1579;1695;1760;1871;2059	390;843;1006;1782;2158;2308;2309;2382;2514;2743	655;656;657;1486;1747;1748;3324;3938;3939;3940;4179;4180;4181;4291;4506;4876	657;1486;1747;3324;3939;4179;4291;4506;4876
sp|P23284|PPIB_HUMAN	sp|P23284|PPIB_HUMAN	6	6	6	>sp|P23284|PPIB_HUMAN Peptidyl-prolyl cis-trans isomerase B OS=Homo sapiens OX=9606 GN=PPIB PE=1 SV=2	1	6	6	6	6	6	6	31.9	31.9	31.9	23.742	216	216	0	35.428	31.9	34668000	34668000	32748000	7	7				99	374;903;939;957;2273;2299	True;True;True;True;True;True	388;935;972;990;2378;2405	539;1233;1277;1296;1297;3192;3229	995;2094;2182;2183;2213;2214;5702;5770	995;2094;2182;2214;5702;5770
sp|P23396|RS3_HUMAN	sp|P23396|RS3_HUMAN	8	8	8	>sp|P23396|RS3_HUMAN 40S ribosomal protein S3 OS=Homo sapiens OX=9606 GN=RPS3 PE=1 SV=2	1	8	8	8	8	8	8	45.3	45.3	45.3	26.688	243	243	0	53.412	45.3	42381000	42381000	40528000	14	14				100	55;261;504;616;668;733;1016;1152	True;True;True;True;True;True;True;True	56;270;522;639;695;760;1054;1196	72;333;698;838;904;980;1374;1565;1566	118;119;564;1255;1476;1588;1589;1701;1702;2340;2341;2706;2707;2708	119;564;1255;1476;1588;1702;2341;2708
sp|P23528|COF1_HUMAN;sp|Q9Y281|COF2_HUMAN	sp|P23528|COF1_HUMAN	5;2	5;2	5;2	>sp|P23528|COF1_HUMAN Cofilin-1 OS=Homo sapiens OX=9606 GN=CFL1 PE=1 SV=3	2	5	5	5	5	5	5	40.4	40.4	40.4	18.502	166	166;166	0	89.902	40.4	64819000	64819000	64819000	9	9				101	218;489;1103;1605;2427	True;True;True;True;True	224;505;1144;1670;2535	279;673;1489;2275;3395	473;474;1219;1220;1221;2567;4113;6029;6030	474;1220;2567;4113;6030
sp|P24539|AT5F1_HUMAN	sp|P24539|AT5F1_HUMAN	5	5	5	>sp|P24539|AT5F1_HUMAN ATP synthase F(0) complex subunit B1, mitochondrial OS=Homo sapiens OX=9606 GN=ATP5PB PE=1 SV=2	1	5	5	5	5	5	5	22.7	22.7	22.7	28.908	256	256	0	45.768	22.7	17440000	17440000	15291000	7	7				102	898;904;1700;1983;2460	True;True;True;True;True	929;936;1771;2072;2569	1226;1227;1234;2395;2759;2760;3438	2082;2083;2095;4307;4308;4309;4904;4905;6096;6097	2083;2095;4308;4904;6097
sp|P24844|MYL9_HUMAN	sp|P24844|MYL9_HUMAN	11	11	4	>sp|P24844|MYL9_HUMAN Myosin regulatory light polypeptide 9 OS=Homo sapiens OX=9606 GN=MYL9 PE=1 SV=4	1	11	11	4	11	11	4	66.3	66.3	24.4	19.827	172	172	0	323.31	66.3	711350000	711350000	605990000	46	46				103	207;277;405;424;434;522;664;780;1115;1364;1565	True;True;True;True;True;True;True;True;True;True;True	212;213;286;420;421;440;450;541;690;691;807;1157;1415;1629	263;264;265;266;353;354;355;356;574;575;576;577;598;611;612;718;899;900;1037;1503;1922;2222;2223	442;443;444;445;446;447;448;449;450;451;595;596;597;598;599;600;601;602;603;1054;1055;1056;1057;1058;1093;1111;1112;1113;1293;1294;1295;1579;1580;1581;1582;1583;1793;1794;2596;3527;3528;3529;3530;4031;4032;4033	448;600;1058;1093;1112;1295;1582;1794;2596;3528;4032	1;2;43	25;40;142
sp|P25705|ATPA_HUMAN	sp|P25705|ATPA_HUMAN	15	15	15	>sp|P25705|ATPA_HUMAN ATP synthase subunit alpha, mitochondrial OS=Homo sapiens OX=9606 GN=ATP5F1A PE=1 SV=1	1	15	15	15	15	15	15	36.9	36.9	36.9	59.75	553	553	0	155.26	36.9	276050000	276050000	264680000	33	33				104	212;428;541;569;608;776;845;1006;1237;1301;2069;2078;2137;2318;2396	True;True;True;True;True;True;True;True;True;True;True;True;True;True;True	218;444;562;590;630;803;872;1041;1283;1352;2160;2169;2232;2424;2503	271;603;742;743;779;780;827;828;1033;1119;1358;1762;1846;2875;2887;2964;3249;3355	459;1101;1102;1333;1334;1335;1383;1384;1385;1386;1387;1388;1389;1390;1463;1464;1465;1789;1926;2309;2310;3287;3288;3423;5112;5113;5114;5131;5132;5244;5799;5964;5965	459;1101;1333;1390;1463;1789;1926;2310;3288;3423;5113;5132;5244;5799;5965	44	51
sp|P26038|MOES_HUMAN;sp|P35241|RADI_HUMAN	sp|P26038|MOES_HUMAN	9;3	9;3	6;0	>sp|P26038|MOES_HUMAN Moesin OS=Homo sapiens OX=9606 GN=MSN PE=1 SV=3	2	9	9	6	9	9	6	16.6	16.6	13.2	67.819	577	577;583	0	65.99	16.6	28744000	28744000	28744000	12	12				105	140;156;173;960;1090;1091;1307;2034;2129	True;True;True;True;True;True;True;True;True	145;161;178;993;1130;1131;1358;2123;2224	185;202;223;1300;1469;1470;1855;2828;2954	310;341;342;374;2217;2218;2531;2532;3434;5025;5026;5224	310;341;374;2217;2531;2532;3434;5026;5224
sp|P27797|CALR_HUMAN	sp|P27797|CALR_HUMAN	10	10	10	>sp|P27797|CALR_HUMAN Calreticulin OS=Homo sapiens OX=9606 GN=CALR PE=1 SV=1	1	10	10	10	10	10	10	40.8	40.8	40.8	48.141	417	417	0	81.021	40.8	106290000	106290000	102310000	33	33				106	545;676;770;851;920;928;991;1151;1910;2263	True;True;True;True;True;True;True;True;True;True	566;703;797;880;953;961;1026;1195;1997;2367	747;912;1026;1128;1129;1258;1266;1342;1564;2666;2667;2668;3175	1341;1600;1776;1946;1947;2152;2161;2162;2163;2164;2165;2166;2167;2168;2287;2288;2289;2290;2702;2703;2704;2705;4760;4761;4762;4763;4764;4765;4766;4767;4768;4769;4770;5671	1341;1600;1776;1946;2152;2167;2287;2704;4760;5671
sp|P27824|CALX_HUMAN	sp|P27824|CALX_HUMAN	11	11	11	>sp|P27824|CALX_HUMAN Calnexin OS=Homo sapiens OX=9606 GN=CANX PE=1 SV=2	1	11	11	11	11	11	11	23.6	23.6	23.6	67.567	592	592	0	88.832	23.6	92981000	92981000	79421000	26	26				107	46;164;817;1027;1070;1122;1169;2071;2123;2414;2434	True;True;True;True;True;True;True;True;True;True;True	47;169;844;1065;1109;1164;1213;2162;2218;2522;2543	61;62;211;212;213;1080;1386;1439;1511;1589;1590;2877;2946;2947;3380;3405	103;104;352;353;354;355;356;357;358;1863;1864;2360;2468;2605;2606;2607;2608;2609;2751;2752;5116;5211;5212;5213;5214;6004;6050	103;357;1864;2360;2468;2605;2751;5116;5212;6004;6050
sp|P28799|GRN_HUMAN	sp|P28799|GRN_HUMAN	9	9	9	>sp|P28799|GRN_HUMAN Progranulin OS=Homo sapiens OX=9606 GN=GRN PE=1 SV=2	1	9	9	9	9	9	9	16.2	16.2	16.2	63.544	593	593	0	97.221	16.2	54927000	54927000	51491000	12	12				108	153;209;806;1371;1721;1722;1724;1725;2256	True;True;True;True;True;True;True;True;True	158;215;833;1423;1798;1799;1801;1802;1803;2360	199;268;1066;1930;1931;2430;2431;2432;2433;2435;2436;2437;2438;3168	335;336;337;453;454;1840;3543;3544;4372;4373;4374;4375;4376;4378;4379;4380;4381;4382;5660;5661	337;454;1840;3543;4372;4375;4379;4382;5660
sp|P29401|TKT_HUMAN	sp|P29401|TKT_HUMAN	5	5	5	>sp|P29401|TKT_HUMAN Transketolase OS=Homo sapiens OX=9606 GN=TKT PE=1 SV=3	1	5	5	5	5	5	5	12.5	12.5	12.5	67.877	623	623	0	34.258	12.5	13205000	13205000	13205000	7	7				109	999;1057;1631;2012;2294	True;True;True;True;True	1034;1096;1698;2101;2400	1350;1424;2312;2797;3222	2299;2441;4184;4185;4186;4959;4960;5758	2299;2441;4184;4960;5758
sp|P29692|EF1D_HUMAN	sp|P29692|EF1D_HUMAN	4	4	4	>sp|P29692|EF1D_HUMAN Elongation factor 1-delta OS=Homo sapiens OX=9606 GN=EEF1D PE=1 SV=5	1	4	4	4	4	4	4	22.1	22.1	22.1	31.121	281	281	0	27.22	22.1	23810000	23810000	23810000	8	8				110	678;834;916;1934	True;True;True;True	705;861;949;2021	915;1102;1253;2696	1606;1607;1893;1894;1895;2141;2142;4810	1606;1894;2142;4810
sp|P29966|MARCS_HUMAN	sp|P29966|MARCS_HUMAN	7	7	7	>sp|P29966|MARCS_HUMAN Myristoylated alanine-rich C-kinase substrate OS=Homo sapiens OX=9606 GN=MARCKS PE=1 SV=4	1	7	7	7	7	7	7	43.4	43.4	43.4	31.554	332	332	0	74.812	43.4	68053000	68053000	65535000	13	13				111	4;44;413;423;454;705;710	True;True;True;True;True;True;True	4;45;429;439;470;732;737	5;59;586;597;635;943;944;951;952;953	12;99;1073;1074;1092;1155;1156;1651;1652;1653;1661;1662;1663	12;99;1074;1092;1156;1652;1663
sp|P30040|ERP29_HUMAN	sp|P30040|ERP29_HUMAN	5	5	5	>sp|P30040|ERP29_HUMAN Endoplasmic reticulum resident protein 29 OS=Homo sapiens OX=9606 GN=ERP29 PE=1 SV=4	1	5	5	5	5	5	5	27.2	27.2	27.2	28.993	261	261	0	30.844	27.2	16409000	16409000	16409000	6	6				112	275;601;690;798;1950	True;True;True;True;True	284;623;717;825;2037	350;820;928;1056;2715	590;1452;1630;1824;1825;4835	590;1452;1630;1824;4835
sp|P30048|PRDX3_HUMAN	sp|P30048|PRDX3_HUMAN	4	4	4	>sp|P30048|PRDX3_HUMAN Thioredoxin-dependent peroxide reductase, mitochondrial OS=Homo sapiens OX=9606 GN=PRDX3 PE=1 SV=3	1	4	4	4	4	4	4	26.6	26.6	26.6	27.692	256	256	0	48.049	26.6	63601000	63601000	63601000	13	13				113	69;392;763;873	True;True;True;True	71;406;790;902	88;89;558;1016;1161	143;144;145;146;147;148;1029;1030;1031;1761;1762;1991;1992	147;1030;1762;1992
sp|P30101|PDIA3_HUMAN	sp|P30101|PDIA3_HUMAN	12	12	12	>sp|P30101|PDIA3_HUMAN Protein disulfide-isomerase A3 OS=Homo sapiens OX=9606 GN=PDIA3 PE=1 SV=4	1	12	12	12	12	12	12	30.3	30.3	30.3	56.782	505	505	0	79.323	30.3	160140000	160140000	160140000	17	17				114	351;591;634;950;1361;1428;1503;1837;2021;2065;2196;2461	True;True;True;True;True;True;True;True;True;True;True;True	364;613;658;983;1412;1483;1560;1561;1924;2110;2156;2296;2570	495;808;860;1289;1919;2024;2137;2138;2576;2810;2869;2870;3085;3439	916;1434;1512;2201;3523;3712;3904;3905;3906;4606;4980;5099;5100;5101;5102;5514;6098	916;1434;1512;2201;3523;3712;3905;4606;4980;5100;5514;6098	45	434
sp|P31151|S10A7_HUMAN;sp|Q86SG5|S1A7A_HUMAN	sp|P31151|S10A7_HUMAN	4;1	4;1	4;1	>sp|P31151|S10A7_HUMAN Protein S100-A7 OS=Homo sapiens OX=9606 GN=S100A7 PE=1 SV=4	2	4	4	4	4	4	4	41.6	41.6	41.6	11.471	101	101;101	0	34.971	41.6	8370400	8370400	8370400	4	4				115	818;923;1121;1920	True;True;True;True	845;956;1163;2007	1081;1261;1510;2679	1865;2156;2604;4785	1865;2156;2604;4785
sp|P31930|QCR1_HUMAN	sp|P31930|QCR1_HUMAN	4	4	4	>sp|P31930|QCR1_HUMAN Cytochrome b-c1 complex subunit 1, mitochondrial OS=Homo sapiens OX=9606 GN=UQCRC1 PE=1 SV=3	1	4	4	4	4	4	4	13.1	13.1	13.1	52.645	480	480	0	29.905	13.1	10805000	10805000	10805000	7	7				116	35;387;535;1214	True;True;True;True	35;401;556;1259	49;553;736;1646	88;1016;1017;1018;1019;1322;2838	88;1016;1322;2838
sp|P31943|HNRH1_HUMAN;sp|P55795|HNRH2_HUMAN	sp|P31943|HNRH1_HUMAN;sp|P55795|HNRH2_HUMAN	6;4	6;4	4;3	>sp|P31943|HNRH1_HUMAN Heterogeneous nuclear ribonucleoprotein H OS=Homo sapiens OX=9606 GN=HNRNPH1 PE=1 SV=4;>sp|P55795|HNRH2_HUMAN Heterogeneous nuclear ribonucleoprotein H2 OS=Homo sapiens OX=9606 GN=HNRNPH2 PE=1 SV=1	2	6	6	4	6	6	4	18.3	18.3	12.2	49.229	449	449;449	0	54.415	18.3	35191000	35191000	35191000	13	13				117	200;321;891;1042;1999;2257	True;True;True;True;True;True	205;330;922;1081;2088;2361	255;256;414;1211;1212;1407;2779;3169	429;430;431;432;707;2058;2059;2407;4932;4933;5662;5663;5664;5665	432;707;2059;2407;4933;5664
sp|P31946|1433B_HUMAN;sp|Q04917|1433F_HUMAN;sp|P31947|1433S_HUMAN	sp|P31946|1433B_HUMAN	8;3;3	4;0;0	4;0;0	>sp|P31946|1433B_HUMAN 14-3-3 protein beta/alpha OS=Homo sapiens OX=9606 GN=YWHAB PE=1 SV=3	3	8	4	4	8	4	4	39.8	30.1	30.1	28.082	246	246;246;248	0	81.622	39.8	18554000	18554000	18554000	9	9				118	223;367;498;536;1196;1621;2024;2483	True;False;True;False;False;False;True;True	230;380;381;515;557;1240;1686;2113;2592	286;287;520;521;690;737;1625;1626;2297;2813;2814;3464	486;487;488;971;972;973;974;1246;1323;2807;2808;4161;4983;4984;4985;4986;6127	486;973;1246;1323;2808;4161;4984;6127	46	220
sp|P34897|GLYM_HUMAN;sp|P34896|GLYC_HUMAN	sp|P34897|GLYM_HUMAN	8;1	8;1	8;1	>sp|P34897|GLYM_HUMAN Serine hydroxymethyltransferase, mitochondrial OS=Homo sapiens OX=9606 GN=SHMT2 PE=1 SV=3	2	8	8	8	8	8	8	18.8	18.8	18.8	55.992	504	504;483	0	55.603	18.8	46673000	46673000	46673000	11	11				119	147;836;1050;1256;1284;1789;1866;2073	True;True;True;True;True;True;True;True	152;863;1089;1303;1333;1873;1953;2164	192;1104;1105;1416;1783;1822;2516;2613;2880	324;1897;1898;1899;1900;2425;3325;3326;3387;4509;4510;4511;4663;5119	324;1900;2425;3325;3387;4509;4663;5119
sp|P35221|CTNA1_HUMAN;sp|P26232|CTNA2_HUMAN	sp|P35221|CTNA1_HUMAN	5;1	5;1	5;1	>sp|P35221|CTNA1_HUMAN Catenin alpha-1 OS=Homo sapiens OX=9606 GN=CTNNA1 PE=1 SV=1	2	5	5	5	5	5	5	9.5	9.5	9.5	100.07	906	906;953	0	34.902	9.5	9067000	9067000	9067000	8	8				120	0;1342;1697;2143;2321	True;True;True;True;True	0;1393;1768;2238;2427	0;1896;2392;2972;3253	0;1;3493;3494;4304;5255;5804;5805;5806	0;3494;4304;5255;5805
sp|P35232|PHB_HUMAN	sp|P35232|PHB_HUMAN	12	12	12	>sp|P35232|PHB_HUMAN Prohibitin OS=Homo sapiens OX=9606 GN=PHB PE=1 SV=1	1	12	12	12	12	12	12	52.9	52.9	52.9	29.804	272	272	0	106.46	52.9	135180000	135180000	135180000	19	19				121	6;10;325;465;596;952;1005;1133;1608;1802;1811;2311	True;True;True;True;True;True;True;True;True;True;True;True	6;10;334;481;618;985;1040;1175;1673;1887;1897;2417	7;8;13;418;649;814;1291;1356;1357;1526;2279;2531;2542;3242	14;15;16;17;18;19;26;711;1179;1442;1443;1444;2207;2306;2307;2308;2635;2636;4126;4537;4556;5788;5789	15;26;711;1179;1444;2207;2307;2635;4126;4537;4556;5788
sp|P35579|MYH9_HUMAN;REV__sp|Q9UKV3|ACINU_HUMAN	sp|P35579|MYH9_HUMAN	142;1	142;1	119;1	>sp|P35579|MYH9_HUMAN Myosin-9 OS=Homo sapiens OX=9606 GN=MYH9 PE=1 SV=4	2	142	142	119	142	142	119	61.3	61.3	51.4	226.53	1960	1960;1341	0	323.31	61.3	7557900000	7557900000	6991500000	514	514				122	26;27;81;93;111;118;121;123;124;152;186;262;269;304;312;315;317;318;338;356;381;437;446;451;458;459;503;514;516;532;533;544;548;599;635;673;689;704;709;848;849;884;885;908;912;914;977;1015;1024;1047;1089;1100;1105;1108;1130;1134;1135;1144;1145;1146;1149;1156;1171;1177;1180;1223;1230;1231;1245;1295;1296;1306;1308;1309;1394;1398;1403;1407;1414;1447;1490;1509;1510;1549;1564;1573;1592;1611;1622;1632;…	True;True;True;True;True;True;True;True;True;True;True;True;True;True;True;True;True;True;True;True;True;True;True;True;True;True;True;True;True;True;True;True;True;True;True;True;True;True;True;True;True;True;True;True;True;True;True;True;True;True;True;True;True;True;True;True;True;True;True;True;True;True;True;True;True;True;True;True;True;True;True;True;True;True;True;True;True;True;True;True…	26;27;83;95;113;120;121;124;126;127;128;157;191;271;278;313;321;324;326;327;349;350;351;369;395;453;462;467;474;475;521;532;533;535;551;552;553;554;565;569;621;659;700;716;731;736;875;876;877;878;915;916;940;944;947;1010;1011;1052;1053;1062;1086;1129;1141;1146;1150;1172;1176;1177;1186;1187;1188;1189;1192;1193;1200;1215;1221;1224;1269;1276;1277;1291;1292;1346;1347;1357;1359;1360;1447;1452;1457;146…	37;38;39;40;110;124;125;147;154;155;156;159;161;162;163;197;198;237;334;343;344;387;388;396;397;400;401;404;405;406;407;408;409;410;411;477;478;479;480;505;506;507;547;615;626;631;632;640;641;642;696;697;708;709;711;712;729;730;731;732;733;746;751;752;817;818;861;862;909;927;942;949;950;1123;1124;1125;1126;1202;1203;1204;1239;1240;1244;1245;1246;1250;1251;1320;1321;1322;1371;1372;1373;1383;1412;1…	66;67;68;69;70;71;72;73;178;199;200;201;202;203;243;257;258;259;262;264;265;266;267;268;330;331;332;333;334;395;396;565;566;579;580;581;582;651;652;653;664;665;666;670;671;675;676;677;678;679;680;681;682;683;684;685;686;687;688;689;690;691;692;693;694;695;696;697;698;699;700;701;702;703;704;891;892;893;894;895;896;897;938;939;940;1009;1116;1117;1118;1119;1120;1135;1149;1150;1151;1163;1164;1165;11…	68;70;178;200;243;259;262;266;268;331;396;565;581;651;665;670;676;679;896;940;1009;1119;1135;1150;1163;1165;1254;1280;1285;1311;1316;1339;1346;1449;1514;1597;1629;1650;1659;1935;1937;2045;2048;2105;2127;2137;2249;2336;2357;2419;2527;2563;2571;2584;2627;2644;2645;2681;2684;2687;2698;2718;2755;2765;2776;3261;3277;3278;3304;3410;3416;3433;3435;3437;3584;3592;3648;3660;3676;3781;3878;3913;3915;3991;4…	47;48;49;50;51;52;53;54;55;56;57;58;59;60;61;62;63;64;65;66;67;68;69;70	86;137;146;318;323;337;365;484;627;848;871;879;941;1028;1190;1369;1373;1489;1510;1537;1565;1594;1678;1910
sp|P35580|MYH10_HUMAN;REV__sp|Q5T655|CFA58_HUMAN;sp|P13533|MYH6_HUMAN	sp|P35580|MYH10_HUMAN	95;1;1	79;0;1	74;0;0	>sp|P35580|MYH10_HUMAN Myosin-10 OS=Homo sapiens OX=9606 GN=MYH10 PE=1 SV=3	3	95	79	74	95	79	74	52.5	44.7	42.5	229	1976	1976;872;1939	0	323.31	52.5	1331900000	1331900000	1243200000	186	186				123	26;27;36;81;93;109;114;117;120;125;149;189;204;217;234;235;263;289;304;313;328;329;437;447;484;508;511;512;525;599;636;844;846;847;856;880;907;913;970;1071;1073;1108;1120;1129;1132;1143;1148;1157;1159;1173;1213;1217;1223;1246;1300;1393;1401;1402;1404;1407;1481;1511;1547;1573;1599;1606;1612;1623;1633;1650;1658;1659;1666;1670;1676;1745;1758;1759;1762;1808;1809;1832;1878;1935;2053;2072;2131;2135;214…	False;False;True;False;False;True;True;True;True;True;True;True;True;True;True;True;True;True;False;True;True;True;False;True;True;True;True;True;True;False;True;True;True;True;True;True;True;True;True;True;True;False;True;True;True;True;True;True;True;True;True;True;False;True;True;True;True;True;True;False;True;True;True;False;True;True;True;True;True;True;True;True;True;False;True;False;True;T…	26;27;36;37;83;95;111;116;119;123;129;154;194;209;223;243;244;272;298;313;322;337;338;453;463;500;526;529;530;544;621;660;871;873;874;885;911;939;945;946;1003;1110;1112;1113;1150;1162;1171;1174;1185;1191;1201;1203;1217;1258;1263;1269;1293;1351;1446;1455;1456;1458;1461;1462;1537;1569;1610;1638;1664;1671;1677;1689;1690;1700;1717;1726;1727;1735;1736;1740;1746;1824;1840;1841;1845;1893;1894;1895;1919;…	37;38;39;40;50;51;110;124;125;145;150;153;158;164;194;240;260;278;301;302;303;335;370;387;388;398;421;422;423;424;425;615;627;668;702;705;706;721;722;817;818;863;1118;1120;1121;1122;1134;1197;1237;1238;1247;1248;1249;1312;1440;1443;1444;1496;1509;1520;1521;1525;1550;1559;1572;1575;1595;1596;1645;1738;1746;1772;1844;1845;1954;1955;1985;1986;1987;1988;1993;1994;1997;1998;2113;2147;2197;2198;2235;22…	66;67;68;69;70;71;72;73;89;90;178;199;200;201;202;203;240;248;249;256;261;269;270;326;404;438;439;470;471;472;512;513;514;515;516;517;567;568;569;626;651;652;653;667;715;716;717;718;719;720;721;722;723;724;725;726;727;1116;1117;1118;1119;1120;1136;1210;1260;1261;1262;1269;1270;1271;1272;1273;1274;1275;1298;1299;1300;1301;1448;1449;1518;1924;1925;1927;1928;1929;1930;1931;1953;2034;2035;2100;2101;2…	68;70;89;178;200;240;249;256;261;270;326;404;439;471;513;517;568;626;651;667;716;719;1119;1136;1210;1261;1269;1270;1301;1449;1518;1924;1929;1931;1953;2035;2100;2130;2237;2469;2476;2584;2603;2624;2634;2679;2694;2725;2729;2757;2837;3244;3261;3307;3421;3583;3635;3639;3655;3660;3860;3916;3988;4059;4106;4115;4144;4167;4191;4220;4238;4239;4255;4261;4269;4416;4453;4455;4468;4550;4552;4591;4682;4812;5069…	60;70;71;72;73;74;75;76	90;141;372;491;634;878;1517;1752
sp|P35613|BASI_HUMAN	sp|P35613|BASI_HUMAN	5	5	5	>sp|P35613|BASI_HUMAN Basigin OS=Homo sapiens OX=9606 GN=BSG PE=1 SV=2	1	5	5	5	5	5	5	18.4	18.4	18.4	42.2	385	385	0	35.443	18.4	32257000	32257000	32257000	6	6				124	613;738;1887;1892;1986	True;True;True;True;True	635;765;1974;1979;2075	834;986;2638;2647;2763;2764	1472;1710;4700;4714;4908;4909	1472;1710;4700;4714;4909	77	292
sp|P36542|ATPG_HUMAN	sp|P36542|ATPG_HUMAN	4	4	4	>sp|P36542|ATPG_HUMAN ATP synthase subunit gamma, mitochondrial OS=Homo sapiens OX=9606 GN=ATP5F1C PE=1 SV=1	1	4	4	4	4	4	4	20.5	20.5	20.5	32.996	298	298	0	25.321	20.5	15708000	15708000	15708000	7	7				125	870;1084;1153;1571	True;True;True;True	899;1124;1197;1636	1154;1462;1567;2233	1980;1981;1982;2518;2519;2709;4054	1981;2519;2709;4054
sp|P37802|TAGL2_HUMAN;sp|Q9UI15|TAGL3_HUMAN	sp|P37802|TAGL2_HUMAN	10;1	10;1	10;1	>sp|P37802|TAGL2_HUMAN Transgelin-2 OS=Homo sapiens OX=9606 GN=TAGLN2 PE=1 SV=3	2	10	10	10	10	10	10	64.3	64.3	64.3	22.391	199	199;199	0	66.25	64.3	43563000	43563000	43563000	15	15				126	256;287;695;786;1037;1630;1677;1770;2109;2458	True;True;True;True;True;True;True;True;True;True	265;296;722;813;1076;1697;1747;1853;2202;2567	327;368;933;1043;1399;2311;2367;2496;2928;3436	556;557;624;1636;1637;1805;1806;2390;4183;4270;4271;4272;4480;4481;5184;6092;6093	556;624;1636;1805;2390;4183;4272;4481;5184;6092
sp|P38646|GRP75_HUMAN	sp|P38646|GRP75_HUMAN	22	22	22	>sp|P38646|GRP75_HUMAN Stress-70 protein, mitochondrial OS=Homo sapiens OX=9606 GN=HSPA9 PE=1 SV=2	1	22	22	22	22	22	22	38.6	38.6	38.6	73.68	679	679	0	192.1	38.6	176320000	176320000	171870000	39	39				127	148;167;188;257;345;555;1101;1250;1330;1497;1512;1531;1572;1694;1702;1858;2004;2149;2213;2276;2300;2362	True;True;True;True;True;True;True;True;True;True;True;True;True;True;True;True;True;True;True;True;True;True	153;172;193;266;358;576;1142;1297;1381;1553;1570;1591;1637;1764;1765;1773;1774;1945;2093;2245;2314;2381;2406;2468	193;217;239;328;488;761;1486;1487;1776;1883;2130;2148;2176;2234;2388;2389;2397;2398;2602;2785;2988;3106;3107;3195;3196;3230;3231;3305	325;364;365;402;403;558;908;1360;1361;1362;2564;2565;3314;3469;3895;3896;3917;3961;4055;4056;4057;4058;4297;4298;4299;4311;4312;4313;4314;4315;4644;4645;4942;5301;5302;5543;5544;5545;5546;5547;5705;5706;5771;5772;5773;5883;5884;5885	325;364;402;558;908;1362;2565;3314;3469;3896;3917;3961;4058;4299;4312;4644;4942;5302;5545;5706;5771;5884
sp|P39019|RS19_HUMAN	sp|P39019|RS19_HUMAN	10	10	10	>sp|P39019|RS19_HUMAN 40S ribosomal protein S19 OS=Homo sapiens OX=9606 GN=RPS19 PE=1 SV=2	1	10	10	10	10	10	10	51.7	51.7	51.7	16.06	145	145	0	63.859	51.7	50816000	50816000	50816000	10	10				128	382;506;728;865;909;1311;1598;1857;2313;2351	True;True;True;True;True;True;True;True;True;True	396;524;755;894;941;1362;1663;1944;2419;2457	548;700;974;1148;1241;1861;2268;2601;3244;3290	1010;1257;1694;1971;2115;3440;4105;4643;5791;5792;5859	1010;1257;1694;1971;2115;3440;4105;4643;5791;5859
sp|P39023|RL3_HUMAN;sp|Q92901|RL3L_HUMAN	sp|P39023|RL3_HUMAN	8;1	8;1	8;1	>sp|P39023|RL3_HUMAN 60S ribosomal protein L3 OS=Homo sapiens OX=9606 GN=RPL3 PE=1 SV=2	2	8	8	8	8	8	8	26.3	26.3	26.3	46.108	403	403;407	0	53.337	26.3	34683000	34683000	34683000	12	12				129	84;859;969;1241;1637;1924;2153;2172	True;True;True;True;True;True;True;True	86;888;1002;1287;1704;2011;2249;2271	114;1137;1311;1766;2319;2683;2992;3021	182;1957;2235;2236;3295;3296;4201;4790;5312;5313;5357;5358	182;1957;2235;3295;4201;4790;5313;5357
sp|P39656|OST48_HUMAN	sp|P39656|OST48_HUMAN	6	6	6	>sp|P39656|OST48_HUMAN Dolichyl-diphosphooligosaccharide--protein glycosyltransferase 48 kDa subunit OS=Homo sapiens OX=9606 GN=DDOST PE=1 SV=4	1	6	6	6	6	6	6	18.9	18.9	18.9	50.8	456	456	0	48.844	18.9	36881000	36881000	36881000	16	16				130	1669;1990;2020;2116;2241;2419	True;True;True;True;True;True	1739;2079;2109;2210;2345;2527	2358;2769;2809;2936;3146;3386	4259;4916;4917;4978;4979;5194;5195;5196;5612;5613;5614;5615;5616;5617;6015;6016	4259;4916;4978;5194;5613;6016
sp|P40926|MDHM_HUMAN	sp|P40926|MDHM_HUMAN	11	11	11	>sp|P40926|MDHM_HUMAN Malate dehydrogenase, mitochondrial OS=Homo sapiens OX=9606 GN=MDH2 PE=1 SV=3	1	11	11	11	11	11	11	41.4	41.4	41.4	35.503	338	338	0	102.33	41.4	105280000	105280000	101840000	24	24				131	74;478;669;698;946;1038;1113;1456;1528;1977;2346	True;True;True;True;True;True;True;True;True;True;True	76;494;696;725;979;1077;1155;1512;1587;1588;2065;2452	95;662;905;936;1285;1400;1501;2082;2083;2166;2167;2750;3284	157;158;1199;1200;1590;1591;1641;1642;1643;2193;2194;2195;2391;2593;3804;3805;3806;3949;3950;3951;4891;4892;5848;5849	157;1200;1590;1642;2194;2391;2593;3805;3949;4892;5849	78	315
sp|P40939|ECHA_HUMAN	sp|P40939|ECHA_HUMAN	4	4	4	>sp|P40939|ECHA_HUMAN Trifunctional enzyme subunit alpha, mitochondrial OS=Homo sapiens OX=9606 GN=HADHA PE=1 SV=2	1	4	4	4	4	4	4	9.8	9.8	9.8	82.999	763	763	0	32.548	9.8	13246000	13246000	13246000	6	6				132	573;619;2070;2112	True;True;True;True	595;642;2161;2206	787;841;2876;2932	1398;1483;1484;5115;5189;5190	1398;1484;5115;5189
sp|P42224|STAT1_HUMAN	sp|P42224|STAT1_HUMAN	7	7	7	>sp|P42224|STAT1_HUMAN Signal transducer and activator of transcription 1-alpha/beta OS=Homo sapiens OX=9606 GN=STAT1 PE=1 SV=2	1	7	7	7	7	7	7	12.8	12.8	12.8	87.334	750	750	0	48.481	12.8	18214000	18214000	18214000	7	7				133	527;630;1329;1707;1815;1937;2054	True;True;True;True;True;True;True	546;654;1380;1781;1901;2024;2143	724;856;1882;2405;2546;2701;2854;2855	1304;1506;3468;4323;4324;4560;4819;5073;5074;5075	1304;1506;3468;4324;4560;4819;5073
sp|P42704|LPPRC_HUMAN	sp|P42704|LPPRC_HUMAN	9	9	9	>sp|P42704|LPPRC_HUMAN Leucine-rich PPR motif-containing protein, mitochondrial OS=Homo sapiens OX=9606 GN=LRPPRC PE=1 SV=3	1	9	9	9	9	9	9	9.9	9.9	9.9	157.9	1394	1394	0	100.6	9.9	19083000	19083000	19083000	12	12				134	77;320;727;794;1039;1200;1959;2157;2161	True;True;True;True;True;True;True;True;True	79;329;754;821;1078;1244;2047;2253;2258	100;413;973;1052;1401;1630;2730;2997;3003	167;706;1693;1819;1820;2392;2812;2813;4855;5321;5331;5332	167;706;1693;1820;2392;2813;4855;5321;5331
sp|P45880|VDAC2_HUMAN	sp|P45880|VDAC2_HUMAN	9	9	9	>sp|P45880|VDAC2_HUMAN Voltage-dependent anion-selective channel protein 2 OS=Homo sapiens OX=9606 GN=VDAC2 PE=1 SV=2	1	9	9	9	9	9	9	38.4	38.4	38.4	31.566	294	294	0	71.759	38.4	155310000	155310000	151510000	22	22				135	721;1450;1451;1455;1876;2336;2383;2416;2501	True;True;True;True;True;True;True;True;True	748;1506;1507;1511;1963;2442;2489;2524;2611	966;2075;2076;2081;2623;3271;3272;3338;3339;3382;3383;3486	1683;3791;3792;3793;3794;3795;3803;4678;5829;5830;5831;5832;5833;5834;5935;5936;6006;6007;6008;6009;6165;6166	1683;3793;3795;3803;4678;5832;5936;6009;6166
sp|P46777|RL5_HUMAN	sp|P46777|RL5_HUMAN	6	6	6	>sp|P46777|RL5_HUMAN 60S ribosomal protein L5 OS=Homo sapiens OX=9606 GN=RPL5 PE=1 SV=3	1	6	6	6	6	6	6	23.2	23.2	23.2	34.362	297	297	0	44.142	23.2	27268000	27268000	27268000	8	8				136	293;464;696;863;1664;2482	True;True;True;True;True;True	302;480;723;892;1732;2591	376;648;934;1146;2349;3463	635;1178;1638;1968;1969;4248;6125;6126	635;1178;1638;1969;4248;6125
sp|P46940|IQGA1_HUMAN	sp|P46940|IQGA1_HUMAN	4	4	4	>sp|P46940|IQGA1_HUMAN Ras GTPase-activating-like protein IQGAP1 OS=Homo sapiens OX=9606 GN=IQGAP1 PE=1 SV=1	1	4	4	4	4	4	4	4.3	4.3	4.3	189.25	1657	1657	0	29.981	4.3	9004400	9004400	9004400	7	7				137	963;964;998;2343	True;True;True;True	996;997;1033;2449	1303;1304;1305;1349;3280	2224;2225;2226;2227;2228;2298;5844	2226;2227;2298;5844
sp|P47756|CAPZB_HUMAN	sp|P47756|CAPZB_HUMAN	8	8	8	>sp|P47756|CAPZB_HUMAN F-actin-capping protein subunit beta OS=Homo sapiens OX=9606 GN=CAPZB PE=1 SV=4	1	8	8	8	8	8	8	42.2	42.2	42.2	31.35	277	277	0	96.746	42.2	69596000	69596000	64359000	15	15				138	266;393;700;1138;1627;1843;1973;2002	True;True;True;True;True;True;True;True	275;407;727;1180;1694;1930;2061;2091	338;339;559;938;1533;2307;2582;2583;2584;2745;2783	573;574;575;1032;1033;1645;2649;2650;4178;4615;4616;4617;4882;4937;4938	575;1032;1645;2649;4178;4616;4882;4938
sp|P48047|ATPO_HUMAN	sp|P48047|ATPO_HUMAN	7	7	7	>sp|P48047|ATPO_HUMAN ATP synthase subunit O, mitochondrial OS=Homo sapiens OX=9606 GN=ATP5PO PE=1 SV=1	1	7	7	7	7	7	7	45.5	45.5	45.5	23.277	213	213	0	59.555	45.5	61565000	61565000	61565000	13	13				139	659;714;1482;1894;2047;2170;2431	True;True;True;True;True;True;True	685;741;1538;1981;2136;2269;2540	893;957;2114;2115;2649;2843;3018;3401	1571;1670;1671;3861;3862;3863;3864;4718;4719;5052;5053;5354;6037	1571;1671;3861;4719;5053;5354;6037
sp|P48643|TCPE_HUMAN	sp|P48643|TCPE_HUMAN	4	4	4	>sp|P48643|TCPE_HUMAN T-complex protein 1 subunit epsilon OS=Homo sapiens OX=9606 GN=CCT5 PE=1 SV=1	1	4	4	4	4	4	4	16.1	16.1	16.1	59.67	541	541	0	24.889	16.1	6576400	6576400	6576400	3	3				140	59;1768;1947;1975	True;True;True;True	60;1851;2034;2063	77;2494;2711;2748	125;4476;4477;4478;4831;4889	125;4478;4831;4889
sp|P48735|IDHP_HUMAN	sp|P48735|IDHP_HUMAN	4	4	4	>sp|P48735|IDHP_HUMAN Isocitrate dehydrogenase [NADP], mitochondrial OS=Homo sapiens OX=9606 GN=IDH2 PE=1 SV=2	1	4	4	4	4	4	4	10.8	10.8	10.8	50.909	452	452	0	59.598	10.8	12879000	12879000	12879000	4	4				141	989;1359;1478;2092	True;True;True;True	1024;1410;1534;2185	1340;1916;1917;2109;2909	2285;3520;3521;3850;5161	2285;3521;3850;5161
sp|P49257|LMAN1_HUMAN	sp|P49257|LMAN1_HUMAN	6	6	6	>sp|P49257|LMAN1_HUMAN Protein ERGIC-53 OS=Homo sapiens OX=9606 GN=LMAN1 PE=1 SV=2	1	6	6	6	6	6	6	12.7	12.7	12.7	57.548	510	510	0	36.934	12.7	14273000	14273000	14273000	6	6				142	740;1661;1753;2498;2520;2521	True;True;True;True;True;True	767;1729;1832;2608;2630;2631	988;2346;2471;3483;3510;3511	1713;1714;1715;4243;4437;6160;6200;6201	1713;4243;4437;6160;6200;6201
sp|P49327|FAS_HUMAN	sp|P49327|FAS_HUMAN	4	4	4	>sp|P49327|FAS_HUMAN Fatty acid synthase OS=Homo sapiens OX=9606 GN=FASN PE=1 SV=3	1	4	4	4	4	4	4	2.9	2.9	2.9	273.42	2511	2511	0	31.473	2.9	5686400	5686400	5686400	6	6				143	1373;1417;2107;2238	True;True;True;True	1425;1472;2200;2342	1933;2011;2926;3143	3546;3547;3693;5181;5182;5609	3547;3693;5181;5609
sp|P49411|EFTU_HUMAN	sp|P49411|EFTU_HUMAN	11	11	11	>sp|P49411|EFTU_HUMAN Elongation factor Tu, mitochondrial OS=Homo sapiens OX=9606 GN=TUFM PE=1 SV=2	1	11	11	11	11	11	11	31.4	31.4	31.4	49.541	452	452	0	75.784	31.4	93922000	93922000	93922000	20	20				144	42;316;480;707;752;820;1112;1186;2093;2166;2440	True;True;True;True;True;True;True;True;True;True;True	43;325;496;734;779;847;1154;1230;2186;2265;2549	57;402;403;664;947;1003;1004;1083;1500;1612;2910;3012;3013;3413	97;672;673;674;1203;1656;1741;1742;1743;1868;1869;2592;2785;5162;5163;5164;5345;5346;5347;6059	97;673;1203;1656;1741;1869;2592;2785;5163;5346;6059
sp|P50402|EMD_HUMAN	sp|P50402|EMD_HUMAN	4	4	4	>sp|P50402|EMD_HUMAN Emerin OS=Homo sapiens OX=9606 GN=EMD PE=1 SV=1	1	4	4	4	4	4	4	20.5	20.5	20.5	28.994	254	254	0	23.732	20.5	21962000	21962000	21962000	6	6				145	362;1102;2168;2494	True;True;True;True	375;1143;2267;2603	514;1488;3015;3476;3477	954;955;2566;5350;6151;6152	954;2566;5350;6151
sp|P50454|SERPH_HUMAN	sp|P50454|SERPH_HUMAN	12	12	12	>sp|P50454|SERPH_HUMAN Serpin H1 OS=Homo sapiens OX=9606 GN=SERPINH1 PE=1 SV=2	1	12	12	12	12	12	12	42.1	42.1	42.1	46.44	418	418	0	134.84	42.1	148120000	148120000	136170000	27	27				146	219;260;353;376;832;866;1150;1397;1440;1494;1868;2074	True;True;True;True;True;True;True;True;True;True;True;True	225;269;366;390;859;895;1194;1450;1451;1495;1550;1955;2165	280;331;332;497;498;541;1098;1099;1149;1562;1563;1960;1961;2037;2127;2615;2881	475;476;561;562;563;918;919;920;921;922;923;999;1889;1890;1972;1973;2700;2701;3588;3589;3733;3884;3885;4667;4668;4669;5120	476;562;920;999;1890;1972;2701;3588;3733;3885;4668;5120	79	258
sp|P50991|TCPD_HUMAN	sp|P50991|TCPD_HUMAN	5	5	5	>sp|P50991|TCPD_HUMAN T-complex protein 1 subunit delta OS=Homo sapiens OX=9606 GN=CCT4 PE=1 SV=4	1	5	5	5	5	5	5	11.3	11.3	11.3	57.924	539	539	0	29.81	11.3	8496400	8496400	8496400	6	6				147	562;746;1772;2114;2266	True;True;True;True;True	583;773;1855;2208;2370	769;996;2498;2934;3178	1373;1731;1732;4483;5192;5675;5676	1373;1731;4483;5192;5676
sp|P51148|RAB5C_HUMAN;sp|P61020|RAB5B_HUMAN;sp|P20339|RAB5A_HUMAN	sp|P51148|RAB5C_HUMAN	5;1;1	5;1;1	5;1;1	>sp|P51148|RAB5C_HUMAN Ras-related protein Rab-5C OS=Homo sapiens OX=9606 GN=RAB5C PE=1 SV=2	3	5	5	5	5	5	5	28.7	28.7	28.7	23.482	216	216;215;215	0	30.562	28.7	12897000	12897000	11169000	5	5				148	824;1584;1701;2033;2462	True;True;True;True;True	851;1649;1772;2122;2571	1088;1089;2253;2396;2827;3440	1874;1875;4080;4310;5024;6099	1875;4080;4310;5024;6099	80	176
sp|P51149|RAB7A_HUMAN	sp|P51149|RAB7A_HUMAN	6	6	6	>sp|P51149|RAB7A_HUMAN Ras-related protein Rab-7a OS=Homo sapiens OX=9606 GN=RAB7A PE=1 SV=1	1	6	6	6	6	6	6	34.8	34.8	34.8	23.489	207	207	0	44.981	34.8	45316000	45316000	45316000	9	9				149	202;350;414;1489;2140;2271	True;True;True;True;True;True	207;363;430;1545;2235;2376	258;494;587;2122;2967;3189	434;435;914;915;1075;3876;3877;5248;5696	435;915;1075;3877;5248;5696
sp|P51571|SSRD_HUMAN	sp|P51571|SSRD_HUMAN	4	4	4	>sp|P51571|SSRD_HUMAN Translocon-associated protein subunit delta OS=Homo sapiens OX=9606 GN=SSR4 PE=1 SV=1	1	4	4	4	4	4	4	30.6	30.6	30.6	18.998	173	173	0	27.361	30.6	30357000	30357000	27152000	5	5				150	611;1638;1865;2361	True;True;True;True	633;1705;1952;2467	832;2320;2611;2612;3304	1470;4202;4661;4662;5882	1470;4202;4661;5882
sp|P51572|BAP31_HUMAN	sp|P51572|BAP31_HUMAN	4	4	4	>sp|P51572|BAP31_HUMAN B-cell receptor-associated protein 31 OS=Homo sapiens OX=9606 GN=BCAP31 PE=1 SV=3	1	4	4	4	4	4	4	15	15	15	27.991	246	246	0	29.671	15	32471000	32471000	32062000	5	5				151	56;1321;1386;2490	True;True;True;True	57;1372;1438;1439;2599	73;1873;1946;1947;3471	120;3456;3457;3573;3574;6140	120;3457;3573;6140	81	241
sp|P52272|HNRPM_HUMAN	sp|P52272|HNRPM_HUMAN	7	7	7	>sp|P52272|HNRPM_HUMAN Heterogeneous nuclear ribonucleoprotein M OS=Homo sapiens OX=9606 GN=HNRNPM PE=1 SV=3	1	7	7	7	7	7	7	12.9	12.9	12.9	77.515	730	730	0	41.836	12.9	21900000	21900000	21900000	8	8				152	65;779;1518;1519;1521;1522;2243	True;True;True;True;True;True;True	66;806;1577;1578;1580;1581;2347	83;1036;2156;2157;2159;2160;3148	134;135;1792;3936;3937;3941;3942;5619	135;1792;3936;3937;3941;3942;5619
sp|P52907|CAZA1_HUMAN	sp|P52907|CAZA1_HUMAN	11	11	9	>sp|P52907|CAZA1_HUMAN F-actin-capping protein subunit alpha-1 OS=Homo sapiens OX=9606 GN=CAPZA1 PE=1 SV=3	1	11	11	9	11	11	9	58.7	58.7	52.8	32.922	286	286	0	82.858	58.7	101760000	101760000	99634000	22	22				153	291;384;426;557;627;666;935;976;1335;2091;2100	True;True;True;True;True;True;True;True;True;True;True	300;398;442;578;651;693;968;1009;1386;2184;2193	374;550;600;601;763;851;852;902;1273;1319;1888;2908;2918	631;632;633;1012;1013;1096;1097;1098;1099;1364;1499;1500;1501;1502;1585;2177;2178;2246;3480;3481;3482;5160;5172	632;1013;1096;1364;1502;1585;2177;2246;3482;5160;5172
sp|P54886|P5CS_HUMAN	sp|P54886|P5CS_HUMAN	11	11	11	>sp|P54886|P5CS_HUMAN Delta-1-pyrroline-5-carboxylate synthase OS=Homo sapiens OX=9606 GN=ALDH18A1 PE=1 SV=2	1	11	11	11	11	11	11	18.4	18.4	18.4	87.301	795	795	0	76.336	18.4	28456000	28456000	27841000	14	14				154	340;795;1206;1368;1525;1534;2046;2126;2252;2371;2481	True;True;True;True;True;True;True;True;True;True;True	353;822;1250;1420;1584;1595;2135;2221;2356;2477;2590	482;1053;1636;1927;2163;2181;2842;2950;2951;3162;3320;3462	899;1821;2822;3539;3945;3966;5049;5050;5051;5219;5220;5221;5650;5904;6124	899;1821;2822;3539;3945;3966;5050;5219;5650;5904;6124
sp|P55072|TERA_HUMAN	sp|P55072|TERA_HUMAN	10	10	10	>sp|P55072|TERA_HUMAN Transitional endoplasmic reticulum ATPase OS=Homo sapiens OX=9606 GN=VCP PE=1 SV=4	1	10	10	10	10	10	10	16.9	16.9	16.9	89.321	806	806	0	78.811	16.9	38619000	38619000	38619000	12	12				155	100;526;567;1197;1234;1260;1506;1693;2277;2410	True;True;True;True;True;True;True;True;True;True	102;545;588;1241;1280;1308;1564;1763;2382;2518	134;723;777;1627;1759;1789;2141;2387;3197;3375	223;1302;1303;1381;2809;3284;3337;3338;3909;4296;5707;5997;5998	223;1303;1381;2809;3284;3338;3909;4296;5707;5997
sp|P55209|NP1L1_HUMAN;sp|Q99733|NP1L4_HUMAN	sp|P55209|NP1L1_HUMAN	5;1	5;1	5;1	>sp|P55209|NP1L1_HUMAN Nucleosome assembly protein 1-like 1 OS=Homo sapiens OX=9606 GN=NAP1L1 PE=1 SV=1	2	5	5	5	5	5	5	22	22	22	45.374	391	391;375	0	47.222	22	25678000	25678000	25678000	13	13				156	607;677;750;1218;1673	True;True;True;True;True	629;704;777;1264;1743	826;913;914;1001;1739;2363	1460;1461;1462;1601;1602;1603;1604;1605;1739;3245;3246;3247;4265	1461;1605;1739;3246;4265
sp|P60174|TPIS_HUMAN	sp|P60174|TPIS_HUMAN	9	9	9	>sp|P60174|TPIS_HUMAN Triosephosphate isomerase OS=Homo sapiens OX=9606 GN=TPI1 PE=1 SV=3	1	9	9	9	9	9	9	47.9	47.9	47.9	30.791	286	286	0	74.864	47.9	66984000	66984000	66984000	17	17				157	254;507;612;917;990;1962;2347;2388;2400	True;True;True;True;True;True;True;True;True	263;525;634;950;1025;2050;2453;2494;2508	325;701;833;1254;1341;2733;3285;3286;3345;3361	550;551;1258;1259;1471;2143;2286;4860;5850;5851;5852;5853;5854;5946;5947;5973;5974	551;1259;1471;2143;2286;4860;5851;5946;5973
sp|P60660|MYL6_HUMAN;sp|P14649|MYL6B_HUMAN	sp|P60660|MYL6_HUMAN	9;2	9;2	9;2	>sp|P60660|MYL6_HUMAN Myosin light polypeptide 6 OS=Homo sapiens OX=9606 GN=MYL6 PE=1 SV=2	2	9	9	9	9	9	9	70.2	70.2	70.2	16.93	151	151;208	0	236.88	70.2	933670000	933670000	787350000	49	49				158	129;357;406;895;1013;1554;1609;1877;2292	True;True;True;True;True;True;True;True;True	133;370;422;926;1048;1049;1618;1674;1964;2397;2398	170;508;578;1216;1217;1218;1219;1220;1221;1222;1223;1366;1367;2209;2280;2281;2624;2625;3216;3217;3218;3219;3220	280;281;941;942;943;1059;1060;2066;2067;2068;2069;2070;2071;2072;2073;2074;2075;2076;2077;2325;2326;2327;2328;4009;4010;4011;4012;4127;4128;4129;4130;4131;4132;4679;4680;5743;5744;5745;5746;5747;5748;5749;5750;5751;5752;5753;5754;5755;5756	280;943;1060;2067;2328;4009;4128;4680;5751	82;83;84	36;73;127
sp|P63261|ACTG_HUMAN;sp|P60709|ACTB_HUMAN;sp|Q6S8J3|POTEE_HUMAN;sp|A5A3E0|POTEF_HUMAN;sp|P0CG38|POTEI_HUMAN;sp|Q9BYX7|ACTBM_HUMAN;sp|P0CG39|POTEJ_HUMAN	sp|P63261|ACTG_HUMAN;sp|P60709|ACTB_HUMAN	25;25;9;7;6;4;4	25;25;9;7;6;4;4	12;12;4;2;2;2;2	>sp|P63261|ACTG_HUMAN Actin, cytoplasmic 2 OS=Homo sapiens OX=9606 GN=ACTG1 PE=1 SV=1;>sp|P60709|ACTB_HUMAN Actin, cytoplasmic 1 OS=Homo sapiens OX=9606 GN=ACTB PE=1 SV=1	7	25	25	12	25	25	12	70.7	70.7	44	41.792	375	375;375;1075;1075;1075;375;1038	0	323.31	70.7	12560000000	12560000000	7960100000	767	767				159	80;214;215;232;331;337;368;369;491;499;653;840;878;974;994;995;1081;1099;1215;1711;1712;2016;2146;2183;2497	True;True;True;True;True;True;True;True;True;True;True;True;True;True;True;True;True;True;True;True;True;True;True;True;True	82;220;221;240;241;340;341;347;348;382;383;507;508;516;517;677;678;679;867;907;908;909;1007;1029;1030;1121;1139;1140;1260;1261;1785;1786;1787;1788;2105;2241;2242;2283;2606;2607	103;104;105;106;107;108;109;275;276;298;299;427;428;435;436;437;438;439;440;441;442;443;444;445;446;447;448;449;450;451;452;453;454;455;456;457;458;459;460;461;462;463;464;465;466;467;468;469;470;471;472;473;474;475;476;522;523;524;525;526;527;528;529;530;531;532;533;676;677;678;679;691;692;884;885;886;887;1109;1110;1111;1112;1113;1114;1166;1167;1168;1169;1170;1171;1172;1173;1174;1175;1176;1177;1…	171;172;173;174;175;176;177;463;464;465;466;467;468;503;504;505;506;507;508;509;510;729;730;731;732;733;734;743;744;745;746;747;748;749;750;751;752;753;754;755;756;757;758;759;760;761;762;763;764;765;766;767;768;769;770;771;772;773;774;775;776;777;778;779;780;781;782;783;784;785;786;787;788;789;790;791;792;793;794;795;796;797;798;799;800;801;802;803;804;805;806;807;808;809;810;811;812;813;814;815…	173;464;468;509;733;762;979;985;1225;1248;1558;1907;2021;2243;2293;2295;2507;2558;2847;4338;4348;4964;5279;5395;6158	85;86;87;88;89;90;91;92;93;94	44;47;82;153;190;227;269;283;305;325
sp|P60842|IF4A1_HUMAN;sp|Q14240|IF4A2_HUMAN;sp|P38919|IF4A3_HUMAN	sp|P60842|IF4A1_HUMAN;sp|Q14240|IF4A2_HUMAN	7;5;1	7;5;1	7;5;1	>sp|P60842|IF4A1_HUMAN Eukaryotic initiation factor 4A-I OS=Homo sapiens OX=9606 GN=EIF4A1 PE=1 SV=1;>sp|Q14240|IF4A2_HUMAN Eukaryotic initiation factor 4A-II OS=Homo sapiens OX=9606 GN=EIF4A2 PE=1 SV=2	3	7	7	7	7	7	7	21.9	21.9	21.9	46.153	406	406;407;411	0	47.574	21.9	32384000	32384000	32384000	12	12				160	273;756;837;1399;1517;2228;2304	True;True;True;True;True;True;True	282;783;864;1453;1576;2332;2410	348;1008;1009;1106;1983;2155;3131;3235	587;1750;1751;1752;1901;1902;3631;3632;3935;5592;5779;5780	587;1751;1902;3632;3935;5592;5779
sp|P61224|RAP1B_HUMAN;sp|A6NIZ1|RP1BL_HUMAN;sp|P62834|RAP1A_HUMAN	sp|P61224|RAP1B_HUMAN;sp|A6NIZ1|RP1BL_HUMAN;sp|P62834|RAP1A_HUMAN	4;3;2	4;3;2	4;3;2	>sp|P61224|RAP1B_HUMAN Ras-related protein Rap-1b OS=Homo sapiens OX=9606 GN=RAP1B PE=1 SV=1;>sp|A6NIZ1|RP1BL_HUMAN Ras-related protein Rap-1b-like protein OS=Homo sapiens OX=9606 PE=2 SV=1;>sp|P62834|RAP1A_HUMAN Ras-related protein Rap-1A OS=Homo sapiens	3	4	4	4	4	4	4	35.3	35.3	35.3	20.825	184	184;184;184	0	27.283	35.3	8238500	8238500	8238500	3	3				161	1807;1930;2284;2435	True;True;True;True	1892;2017;2389;2544	2536;2689;3207;3406	4547;4799;5728;6051	4547;4799;5728;6051
sp|P61247|RS3A_HUMAN	sp|P61247|RS3A_HUMAN	5	5	5	>sp|P61247|RS3A_HUMAN 40S ribosomal protein S3a OS=Homo sapiens OX=9606 GN=RPS3A PE=1 SV=2	1	5	5	5	5	5	5	20.1	20.1	20.1	29.945	264	264	0	40.659	20.1	23504000	23504000	21239000	11	11				162	24;154;579;1574;2144	True;True;True;True;True	24;159;601;1639;2239	34;35;200;794;795;2236;2973	60;61;62;63;64;338;1405;1406;1407;4060;5256;5257	64;338;1406;4060;5256
sp|P61586|RHOA_HUMAN;sp|P08134|RHOC_HUMAN;sp|P62745|RHOB_HUMAN	sp|P61586|RHOA_HUMAN	5;2;1	5;2;1	5;2;1	>sp|P61586|RHOA_HUMAN Transforming protein RhoA OS=Homo sapiens OX=9606 GN=RHOA PE=1 SV=1	3	5	5	5	5	5	5	37.8	37.8	37.8	21.768	193	193;193;196	0	33.259	37.8	22453000	22453000	22453000	3	3				163	355;575;955;1532;1806	True;True;True;True;True	368;597;988;1592;1891	504;789;1294;2177;2535	937;1400;2211;3962;4544;4545;4546	937;1400;2211;3962;4545
sp|P61604|CH10_HUMAN	sp|P61604|CH10_HUMAN	7	7	7	>sp|P61604|CH10_HUMAN 10 kDa heat shock protein, mitochondrial OS=Homo sapiens OX=9606 GN=HSPE1 PE=1 SV=2	1	7	7	7	7	7	7	49	49	49	10.932	102	102	0	45.691	49	124820000	124820000	119850000	13	13				164	633;730;759;1110;1859;2305;2401	True;True;True;True;True;True;True	657;757;786;1152;1946;2411;2509	859;976;977;1012;1498;2603;2604;3236;3362;3363	1511;1696;1697;1755;2589;2590;4646;4647;5781;5975;5976;5977;5978	1511;1696;1755;2589;4646;5781;5977
sp|P61978|HNRPK_HUMAN	sp|P61978|HNRPK_HUMAN	9	9	9	>sp|P61978|HNRPK_HUMAN Heterogeneous nuclear ribonucleoprotein K OS=Homo sapiens OX=9606 GN=HNRNPK PE=1 SV=1	1	9	9	9	9	9	9	32.8	32.8	32.8	50.976	463	463	0	101.22	32.8	76803000	76803000	75080000	16	16				165	805;811;921;978;985;988;1624;1846;2050	True;True;True;True;True;True;True;True;True	832;838;954;1012;1019;1023;1691;1933;2139	1065;1073;1259;1323;1333;1339;2302;2303;2587;2846	1839;1851;1852;2153;2254;2255;2275;2284;4170;4171;4172;4173;4620;5058;5059;5060	1839;1851;2153;2254;2275;2284;4171;4620;5058
sp|P61981|1433G_HUMAN	sp|P61981|1433G_HUMAN	7	4	4	>sp|P61981|1433G_HUMAN 14-3-3 protein gamma OS=Homo sapiens OX=9606 GN=YWHAG PE=1 SV=2	1	7	4	4	7	4	4	35.2	29.1	29.1	28.302	247	247	0	32.907	35.2	10566000	10566000	10566000	4	4				166	231;367;513;1196;1621;1678;2023	True;False;True;False;False;True;True	239;380;381;531;1240;1686;1748;2112	297;520;521;707;1625;1626;2297;2368;2812	502;971;972;973;974;1276;2807;2808;4161;4273;4982	502;973;1276;2808;4161;4273;4982	46	223
sp|P62136|PP1A_HUMAN	sp|P62136|PP1A_HUMAN	4	4	2	>sp|P62136|PP1A_HUMAN Serine/threonine-protein phosphatase PP1-alpha catalytic subunit OS=Homo sapiens OX=9606 GN=PPP1CA PE=1 SV=1	1	4	4	2	4	4	2	13.3	13.3	6.1	37.512	330	330	0	27.854	13.3	9335700	9335700	9335700	8	8				167	96;781;1328;1366	True;True;True;True	98;808;1379;1417	128;1038;1881;1924	206;207;208;209;1795;1796;3467;3532	208;1796;3467;3532
sp|P62249|RS16_HUMAN	sp|P62249|RS16_HUMAN	6	6	6	>sp|P62249|RS16_HUMAN 40S ribosomal protein S16 OS=Homo sapiens OX=9606 GN=RPS16 PE=1 SV=2	1	6	6	6	6	6	6	41.8	41.8	41.8	16.445	146	146	0	37.359	41.8	39223000	39223000	35208000	8	8				168	296;732;790;1324;2108;2332	True;True;True;True;True;True	305;759;817;1375;2201;2438	379;979;1047;1048;1877;2927;3266	638;1700;1811;1812;1813;3462;5183;5822	638;1700;1812;3462;5183;5822
sp|P62258|1433E_HUMAN	sp|P62258|1433E_HUMAN	7	4	4	>sp|P62258|1433E_HUMAN 14-3-3 protein epsilon OS=Homo sapiens OX=9606 GN=YWHAE PE=1 SV=1	1	7	4	4	7	4	4	25.9	20	20	29.174	255	255	0	32.551	25.9	24707000	24707000	24707000	8	8				169	7;8;367;396;1196;1621;2477	True;True;False;True;False;False;True	7;8;380;381;410;1240;1686;2586	9;10;11;520;521;562;1625;1626;2297;3458	20;21;22;23;24;971;972;973;974;1037;1038;2807;2808;4161;6119	20;22;973;1037;2808;4161;6119	46	221
sp|P62263|RS14_HUMAN	sp|P62263|RS14_HUMAN	4	4	4	>sp|P62263|RS14_HUMAN 40S ribosomal protein S14 OS=Homo sapiens OX=9606 GN=RPS14 PE=1 SV=3	1	4	4	4	4	4	4	36.4	36.4	36.4	16.273	151	151	0	28.265	36.4	31757000	31757000	31757000	7	7				170	37;517;932;2124	True;True;True;True	38;536;965;2219	52;713;1270;2948	91;92;1287;2172;2173;2174;5215	91;1287;2174;5215
sp|P62269|RS18_HUMAN	sp|P62269|RS18_HUMAN	7	7	7	>sp|P62269|RS18_HUMAN 40S ribosomal protein S18 OS=Homo sapiens OX=9606 GN=RPS18 PE=1 SV=3	1	7	7	7	7	7	7	35.5	35.5	35.5	17.718	152	152	0	48.186	35.5	78889000	78889000	75929000	13	13				171	78;853;1028;1419;1820;2282;2509	True;True;True;True;True;True;True	80;882;1066;1474;1906;2387;2619	101;1131;1387;2014;2015;2551;3205;3497	168;169;1949;2361;2362;3696;3697;3698;4569;5724;5725;5726;6183	168;1949;2361;3697;4569;5725;6183
sp|P62424|RL7A_HUMAN	sp|P62424|RL7A_HUMAN	4	4	4	>sp|P62424|RL7A_HUMAN 60S ribosomal protein L7a OS=Homo sapiens OX=9606 GN=RPL7A PE=1 SV=2	1	4	4	4	4	4	4	18.8	18.8	18.8	29.995	266	266	0	28.715	18.8	22547000	22547000	22547000	5	5				172	94;899;1312;1588	True;True;True;True	96;930;1363;1653	126;1228;1862;1863;2257	204;2084;3441;3442;4086	204;2084;3442;4086
sp|P62701|RS4X_HUMAN;sp|Q8TD47|RS4Y2_HUMAN;sp|P22090|RS4Y1_HUMAN	sp|P62701|RS4X_HUMAN	5;1;1	5;1;1	5;1;1	>sp|P62701|RS4X_HUMAN 40S ribosomal protein S4, X isoform OS=Homo sapiens OX=9606 GN=RPS4X PE=1 SV=2	3	5	5	5	5	5	5	24	24	24	29.597	263	263;263;263	0	29.614	24	23966000	23966000	23966000	8	8				173	248;600;782;1433;2045	True;True;True;True;True	257;622;809;1488;2134	318;819;1039;2030;2841	540;1450;1451;1797;3722;3723;3724;5048	540;1451;1797;3722;5048
sp|P62753|RS6_HUMAN	sp|P62753|RS6_HUMAN	5	5	5	>sp|P62753|RS6_HUMAN 40S ribosomal protein S6 OS=Homo sapiens OX=9606 GN=RPS6 PE=1 SV=1	1	5	5	5	5	5	5	21.3	21.3	21.3	28.68	249	249	0	31.007	21.3	24933000	24933000	22739000	7	7				174	298;1283;1502;1610;1723	True;True;True;True;True	307;1332;1558;1559;1675;1800	381;1821;2135;2136;2282;2283;2434	640;3386;3901;3902;3903;4133;4134;4377	640;3386;3903;4133;4377	95	32
sp|P62805|H4_HUMAN	sp|P62805|H4_HUMAN	9	9	9	>sp|P62805|H4_HUMAN Histone H4 OS=Homo sapiens OX=9606 GN=HIST1H4A PE=1 SV=2	1	9	9	9	9	9	9	52.4	52.4	52.4	11.367	103	103	0	117.77	52.4	634720000	634720000	599630000	30	30				175	252;342;343;1055;1174;1175;2163;2164;2233	True;True;True;True;True;True;True;True;True	261;355;356;1094;1218;1219;2260;2261;2262;2263;2337	322;323;485;486;1422;1597;1598;1599;3005;3006;3007;3008;3009;3137;3138	545;546;547;902;903;904;905;906;2432;2433;2434;2435;2436;2437;2759;2760;2761;2762;5334;5335;5336;5337;5338;5339;5340;5341;5601;5602;5603;5604	546;902;904;2435;2759;2762;5336;5340;5601	96	85
sp|P62879|GBB2_HUMAN;sp|Q9HAV0|GBB4_HUMAN;sp|P62873|GBB1_HUMAN;sp|P16520|GBB3_HUMAN	sp|P62879|GBB2_HUMAN;sp|Q9HAV0|GBB4_HUMAN;sp|P62873|GBB1_HUMAN	5;4;3;1	5;4;3;1	5;4;3;1	>sp|P62879|GBB2_HUMAN Guanine nucleotide-binding protein G(I)/G(S)/G(T) subunit beta-2 OS=Homo sapiens OX=9606 GN=GNB2 PE=1 SV=3;>sp|Q9HAV0|GBB4_HUMAN Guanine nucleotide-binding protein subunit beta-4 OS=Homo sapiens OX=9606 GN=GNB4 PE=1 SV=3;>sp|P62873|GB	4	5	5	5	5	5	5	18.5	18.5	18.5	37.331	340	340;340;340;340	0	30.037	18.5	18946000	18946000	18946000	6	6				176	23;92;523;1285;1348	True;True;True;True;True	23;94;542;1334;1399	33;123;719;1823;1904	59;197;198;1296;3388;3503	59;197;1296;3388;3503
sp|P62888|RL30_HUMAN	sp|P62888|RL30_HUMAN	4	4	4	>sp|P62888|RL30_HUMAN 60S ribosomal protein L30 OS=Homo sapiens OX=9606 GN=RPL30 PE=1 SV=2	1	4	4	4	4	4	4	41.7	41.7	41.7	12.784	115	115	0	24.454	41.7	22171000	22171000	22171000	5	5				177	1165;1471;1941;2194	True;True;True;True	1209;1527;2028;2294	1583;2100;2705;3083	2741;3832;3833;4825;5511	2741;3833;4825;5511
sp|P62906|RL10A_HUMAN	sp|P62906|RL10A_HUMAN	5	5	5	>sp|P62906|RL10A_HUMAN 60S ribosomal protein L10a OS=Homo sapiens OX=9606 GN=RPL10A PE=1 SV=2	1	5	5	5	5	5	5	26.7	26.7	26.7	24.831	217	217	0	35.653	26.7	21099000	21099000	21099000	6	6				178	211;373;578;661;1184	True;True;True;True;True	217;387;600;687;1228	270;538;793;895;896;1610	458;994;1404;1573;1574;2783	458;994;1404;1574;2783
sp|P62937|PPIA_HUMAN;sp|Q9Y536|PAL4A_HUMAN;sp|P0DN26|PAL4F_HUMAN;sp|F5H284|PAL4D_HUMAN;sp|A0A0B4J2A2|PAL4C_HUMAN;sp|A0A075B767|PAL4H_HUMAN;sp|A0A075B759|PAL4E_HUMAN	sp|P62937|PPIA_HUMAN	8;1;1;1;1;1;1	8;1;1;1;1;1;1	8;1;1;1;1;1;1	>sp|P62937|PPIA_HUMAN Peptidyl-prolyl cis-trans isomerase A OS=Homo sapiens OX=9606 GN=PPIA PE=1 SV=2	7	8	8	8	8	8	8	52.1	52.1	52.1	18.012	165	165;164;164;164;164;164;164	0	67.019	52.1	167590000	167590000	167590000	16	16				179	471;604;890;984;1126;2285;2369;2370	True;True;True;True;True;True;True;True	487;626;921;1018;1168;2390;2475;2476	655;823;1210;1332;1517;3208;3209;3317;3318;3319	1186;1455;1456;2056;2057;2274;2618;2619;5729;5730;5731;5899;5900;5901;5902;5903	1186;1455;2057;2274;2618;5729;5900;5902
sp|P63104|1433Z_HUMAN	sp|P63104|1433Z_HUMAN	11	11	7	>sp|P63104|1433Z_HUMAN 14-3-3 protein zeta/delta OS=Homo sapiens OX=9606 GN=YWHAZ PE=1 SV=1	1	11	11	7	11	11	7	47.8	47.8	38	27.745	245	245	0	141.53	47.8	130630000	130630000	121950000	25	25				180	367;536;631;753;1196;1621;2013;2025;2026;2404;2478	True;True;True;True;True;True;True;True;True;True;True	380;381;557;655;780;1240;1686;2102;2114;2115;2512;2587	520;521;737;857;1005;1625;1626;2297;2798;2815;2816;2817;3366;3367;3459	971;972;973;974;1323;1507;1508;1509;1744;1745;1746;2807;2808;4161;4961;4987;4988;4989;4990;4991;4992;4993;5984;5985;6120	973;1323;1508;1745;2808;4161;4961;4987;4990;5985;6120	46	218
sp|P63241|IF5A1_HUMAN;sp|Q6IS14|IF5AL_HUMAN;sp|Q9GZV4|IF5A2_HUMAN	sp|P63241|IF5A1_HUMAN;sp|Q6IS14|IF5AL_HUMAN;sp|Q9GZV4|IF5A2_HUMAN	4;3;2	4;3;2	4;3;2	>sp|P63241|IF5A1_HUMAN Eukaryotic translation initiation factor 5A-1 OS=Homo sapiens OX=9606 GN=EIF5A PE=1 SV=2;>sp|Q6IS14|IF5AL_HUMAN Eukaryotic translation initiation factor 5A-1-like OS=Homo sapiens OX=9606 GN=EIF5AL1 PE=2 SV=2;>sp|Q9GZV4|IF5A2_HUMAN Eu	3	4	4	4	4	4	4	42.9	42.9	42.9	16.832	154	154;154;153	0	31.712	42.9	10796000	10796000	10796000	13	13				181	436;1185;2258;2432	True;True;True;True	452;1229;2362;2541	614;1611;3170;3402;3403	1115;2784;5666;6038;6039;6040;6041;6042;6043;6044;6045;6046;6047;6048	1115;2784;5666;6040
sp|P67809|YBOX1_HUMAN;sp|Q9Y2T7|YBOX2_HUMAN	sp|P67809|YBOX1_HUMAN	5;2	5;2	3;0	>sp|P67809|YBOX1_HUMAN Nuclease-sensitive element-binding protein 1 OS=Homo sapiens OX=9606 GN=YBX1 PE=1 SV=3	2	5	5	3	5	5	3	26.9	26.9	22.2	35.924	324	324;364	0	40.911	26.9	30982000	30982000	29537000	11	11				182	433;442;682;1579;1850	True;True;True;True;True	449;458;709;1644;1937	609;610;622;919;2245;2246;2592;2593	1109;1110;1128;1129;1614;4070;4071;4630;4631;4632;4633	1110;1128;1614;4071;4631
sp|P67936|TPM4_HUMAN	sp|P67936|TPM4_HUMAN	12	6	5	>sp|P67936|TPM4_HUMAN Tropomyosin alpha-4 chain OS=Homo sapiens OX=9606 GN=TPM4 PE=1 SV=3	1	12	6	5	12	6	5	39.1	23.4	19	28.521	248	248	0	140.57	39.1	83519000	83519000	75787000	16	16				183	48;455;495;862;1036;1041;1123;1142;1187;1297;1835;2439	True;True;True;False;True;False;True;True;False;False;False;False	49;471;512;891;1075;1080;1165;1184;1231;1348;1922;2548	64;636;637;685;686;1145;1398;1404;1405;1406;1512;1513;1514;1548;1549;1613;1614;1615;1840;1841;2572;2573;3410;3411;3412	106;1157;1158;1159;1240;1241;1967;2387;2388;2389;2398;2399;2400;2401;2402;2403;2404;2405;2406;2610;2611;2612;2613;2676;2677;2678;2786;2787;2788;3417;3418;4597;4598;4599;6056;6057;6058	106;1158;1241;1967;2389;2399;2611;2676;2787;3417;4597;6057
[truncated: 61 more rows]

## Sheet: proteinGroups_HK-2 control
Protein IDs	Majority protein IDs	Peptide counts (all)	Peptide counts (razor+unique)	Peptide counts (unique)	Fasta headers	Number of proteins	Peptides	Razor + unique peptides	Unique peptides	Peptides PULLDOWN_12UL_S1_CNT_HK2_19NOV2020.raw	Razor + unique peptides PULLDOWN_12UL_S1_CNT_HK2_19NOV2020.raw	Unique peptides PULLDOWN_12UL_S1_CNT_HK2_19NOV2020.raw	Sequence coverage [%]	Unique + razor sequence coverage [%]	Unique sequence coverage [%]	Mol. weight [kDa]	Sequence length	Sequence lengths	Q-value	Score	Sequence coverage PULLDOWN_12UL_S1_CNT_HK2_19NOV2020.raw [%]	Intensity	Intensity PULLDOWN_12UL_S1_CNT_HK2_19NOV2020.raw	LFQ intensity PULLDOWN_12UL_S1_CNT_HK2_19NOV2020.raw	MS/MS Count PULLDOWN_12UL_S1_CNT_HK2_19NOV2020.raw	MS/MS Count	Only identified by site	Reverse	Potential contaminant	id	Peptide IDs	Peptide is razor	Mod. peptide IDs	Evidence IDs	MS/MS IDs	Best MS/MS	Oxidation (M) site IDs	Oxidation (M) site positions
[truncated: 165 more rows]

[truncated: 2 more sheets: proteinGroups_NCM460D sample, proteinGroups_NCM460D control]
